# Supplementary material for: Age-associated microbiome shows the giant panda lives on hemicelluloses, not on cellulose
Source: PubMed Central journal article supplement — ISME J. 2018 Feb 1;12(5):1319–28. doi: 10.1038/s41396-018-0051-y (PMC5931968; doi:10.1038/s41396-018-0051-y), 2018-02-01
Supplement: 41396_2018_51_MOESM1_ESM.pdf [file 41396_2018_51_MOESM1_ESM.pdf]

## Supplementary data

### **Age-associated microbiome shows the giant panda lives on hemicelluloses, not on celluloses**

Wenping Zhang<sup>1\*</sup>, Wenbing Liu<sup>2</sup>, Rong Hou<sup>1</sup>, Liang Zhang<sup>1</sup>, Stephan Schmitz-Esser<sup>3</sup>,  
Huaibo Sun<sup>2</sup>, Junjin Xie<sup>1</sup>, Yunfei Zhang<sup>4</sup>, Chengdong Wang<sup>1</sup>, Lifeng Li<sup>2</sup>, Bisong  
Yue<sup>5</sup>, He Huang<sup>1</sup>, Hairui Wang<sup>1</sup>, Fujun Shen<sup>1</sup>, Zhihe Zhang<sup>1\*</sup>

1, Chengdu Research Base of Giant Panda Breeding, Chengdu 611081, Sichuan,  
China

2, Novogene Bioinformatics Institute, Beijing 100083, PR China.

3, Department of Animal Science, Iowa State University, Ames, 50011 IA, USA

4, Biogas Institute of Ministry of Agriculture, Chengdu 610064, Sichuan, China.

5, Key Laboratory of Bioresources and Ecoenvironment (Ministry of Education),  
College of Life Sciences, Sichuan University, Chengdu 610064, Sichuan, China

\*Corresponding authors.

Email: [zhang\\_zoology@163.com](mailto:zhang_zoology@163.com) (WZ), [zzh@panda.org.cn](mailto:zzh@panda.org.cn) (ZZ)

#### **Includes:**

Supplemental Methods

Supplemental Figure Legends

Supplemental Table Legends

Supplemental References

Supplemental Figures

## Supplemental Methods

### *16S rRNA gene and ITS sequencing data processing*

To characterize the taxonomic profile of the panda gut microbiome, we sequenced the V3 region of the 16S rRNA gene using universal primers targeting most bacteria (F: 5'-ACTCCTACGGGAGGCAGCAG-3', R: 5'-TTACCGCGGCTGCTGGCAC-3') (Chen et al 2014) with a 6-bp barcode unique to each sample for the reverse primer. For the fungal analyses, we sequenced ITS-1 region using universal primer (F: 5'-GCTGCGTTCTTCATCGATGC-3', R: 5'-GGAAGTAAAAGTCGTAACAAGG-3') (Bellemain et al 2010) with a 6-bp barcode unique to each sample for the paired primer. The PCR conditions were 94°C for 4 min, followed by 30 cycles of 94°C for 30s, 54°C for 30s and 72°C for 30s and then 72°C for 5 min. The single amplifications were performed in 25 µL reactions with 50 ng template DNA. Normalized equimolar concentrations of PCR products were then pooled and sequenced using the Illumina MiSeq PE-250 platform. Barcodes and sequencing primers were trimmed before assembly.

Paired-end sequence reads were assembled using FLASH (Magoc and Salzberg 2011) (<http://ccb.jhu.edu/software/FLASH/>) and quality filtering was done with QIIME (Caporaso et al 2010) with the default settings. These trimmed sequences were then chimera filtered, singletons discarded, and assigned to operational taxonomic units (OTUs, cutoff 97% sequence identity for 16S rRNA and ITS) using UPARSE (Edgar 2013) pipeline (<http://drive5.com/uparse/>). Representative sequences for each OTU

were chosen for classification using the RDP-classifier (version 2.2, (Wang et al 2007)) with an 80% confidence level against the Greengenes 13.5 database and UNITE database for 16S rRNA and ITS sequences, respectively. Alpha- and Beta-diversity analyses were performed using observed OTUs and Unifrac distances respectively, as implemented in QIIME.

#### *Shotgun metagenome sequencing and data processing*

Based on the bacterial diversity and Unifrac distances of 332 samples from giant pandas, 57 samples were selected for shotgun metagenome sequencing (Supplementary Table S1). Our samples included different seasons and bamboo stem/leaves or shoots as diet. Metagenome DNA libraries were generated using NEBNext® Ultra™ DNA Library Prep Kit for Illumina (NEB, USA) following the manufacturer's instruction (Illumina HiSeq2500) and index codes were added to attribute sequences to each sample. One paired-end library with an insert size of 300 bp for each sample was built and sequenced with 125bp read length from each end. After sequencing, adaptor contamination, low quality reads, giant panda host reads, and the reads of food contamination were removed from the raw sequencing reads by the SoapAligner module in the SOAP package (Li et al 2009). On average, 5.2Gbp clean data per sample were generated (Supplementary Table S3). The proportion of high-quality clean data of all raw data from each sample was 80.1% on average.

The clean data were assembled into contigs for each sample by SOAPdenovo2 (Luo et al 2012). We tried different *K-mer* values (45, 55, 65, 75, and 85) to obtain optimal

assembly results and used N50 lengths to determine the best assembly result. The K-mer (55) was used in our study. Scaffigs (using information from special type of spanning reads to assemble contigs together into larger sequences) derived from assembled scaffolds longer than 500 nt were maintained and clustered into a non-redundant data set by CD-HIT (Fu et al 2012) using a sequence identity cut-off of 0.95 (Karlsson et al 2013).

Then, a pan-metagenome was constructed and used to analyze metagenome development from birth to juvenile of giant pandas.

#### *Pan-metagenome construction*

The pan-metagenome was constructed in the following steps (Supplemental Fig. S2):

(1) Blastall was used to align assembled contigs (parameters: -e 1e-5) of all samples.

Contigs were clustered by identity $\geq$ 95% and coverage $\geq$ 95% and only the longest

sequence in one cluster was kept for the following analysis; (2) if two alignment

sequences had both un-aligned end parts shorter than 30bp, a GC content difference of

less than 10%, and an alignment length  $\geq$ 100bp, a connection will be established

between the sequences. If no bifurcation occurred in the alignment of one connection

of two sequences, the two sequences will be combined to one sequence and all those

sequences were merged in a file named "chain.fasta"; otherwise, the remaining

sequences were written to a file named "unchain.fasta". All unmapped reads to

assemble the results of reads, were named "unmap.fasta". Finally, "chain.fasta",

“unchain.fasta” and “unmap.fasta” were merged, and the above steps were repeated to obtain the non-redundant genome sets (pan-metagenome).

#### *Taxonomy annotation and abundance analysis*

The Micro\_NT taxonomy database composed of microbial reference genomes was extracted from the National Center for Biological Information (NCBI) NT database (Version: 2014-10-19). The non-redundant scaffigs set of the pan-metagenome was aligned to reference genomes by BLAST using an e-value cut-off of  $10^{-5}$ . Then, we determined the taxonomic level of each scaffig by the lowest common ancestor (LCA)-based algorithm implemented in MEGAN4 (Qin et al. 2010; Huson et al. 2011). The abundance of annotated microbes can be assessed by mapping of all high-quality sequencing reads from individual samples onto the non-redundant scaffigs set of the pan-metagenome (Le Chatelier et al. 2013) by using Bowtie (Langmead and Salzberg 2012).

#### *Metagenome linking group (MLG) construction*

STEP1: SOAP2 (SOAPaligner) was used to map all the reads of each sample to the pan-metagenome. If one contig of the pan-metagenome had no mapping reads in more than 51 samples, the contig will be filtered for next steps. Then, Qin’s method (Qin et al 2012) was used here to evaluate the abundance of contigs. The abundance value of each contig of the pan-metagenome in each sample was obtained by the following formula (1).

$$a_i = \frac{x_i / L_i}{\sum_j x_j / L_j} \quad (1)$$

$a_i$ : The relative abundance of contig  $i$  in sample  $S$ .

$L_i$ : The length of contig  $i$ .

$x_i$ : The times which gene  $i$  can be detected in sample  $S$  (the number of mapped reads). In our sequence-based profiling analysis, only two types of alignments could be accepted: 1). an entire of a paired-end read can be mapped onto a contig with the correct insert-size; 2). one end of the paired-end read can be mapped onto the end of a contig, only if the other end of read was mapped outside the contig region. In both cases, the mapped read was counted as one copy.

The abundance value of each contig of the pan-metagenome in all samples (57 samples) was combined in abundance vector.

STEP2: The triple codon frequency (TCF) of each contig of the pan-metagenome was obtained using a 3bp window size starting with the first base pair of the contig and moving 1 bp every time. Moreover, the TCF of the reverse complementary sequence

of the same contig was obtained following the same protocol. The two TCFs were combined to obtain the final TCF vector for the contig.

STEP3: Based on abundance and TCF vectors of each contig of the pan-metagenome, the Pearson correlation coefficients (PCC) of abundance (abundance -PCC) and TCF (TCF-PCC) were calculated between two contigs (X and Y) following formula (2), respectively. Then the two contigs with TCF-PCC>0.9 and abundance-PCC>0.9 were selected to establish a single connection.

$$PCC(X,Y) = \frac{N \sum XY - \sum X \sum Y}{\sqrt{N \sum X^2 - (\sum X)^2} \sqrt{N \sum Y^2 - (\sum Y)^2}} \quad (2)$$

N: number of samples (57);

X: contig X vector (abundance or TCF for each sample);

Y: contig Y vector (abundance or TCF for each sample);

PCC(X,Y): the Pearson correlation coefficients between contig X and contig Y

(for abundance or TCF).

STEP4: According to the single connection, all the related sequences were clustered into one class in which every two sequence must have abundance-PCC>0.9 and TCF-PCC>0.9.

STEP5: abundance and TCF were re-calculated with weighting the total sequence length in one class from STEP4 for each contig of the pan-metagenome with the following formula (3). Then STEP3-5 was repeated until no more sequences could be merged into one class obtained from STEP4. Then all contigs in one class were one MLG.

$$V(G,i) = \frac{\sum_{j \in G} V(j,i) * L(j)}{\sum_{j \in G} L(j)} \quad (3)$$

$V(G,i)$ : the value (abundance or TCF) of the new class G in sample i;

j: the original contigs or classes beyond to class G;

$V(j,i)$ : the value (abundance or TCF) of contig (or class) j in sample i;

$L(j)$ : the total number of sequence base within contig (or class) j.

#### *MLG taxonomy annotation*

The taxonomy annotation of each MLG was performed on reference genomes derived from the NCBI NT database (Version: 2014-10-19). Genome sequences <1 Mbp were filtered in the database and reference genomes covering more than 1% of the MLG were kept for subsequent analysis. Finally, the reference genome with highest MLG coverage was used for the taxonomy information of the MLG (Supplemental Table S5).

#### *Gene prediction and function annotation*



Gene prediction was performed by MetaGeneMark (Zhu et al. 2010) and a non-redundant predicted gene catalogue was constructed with CD-HIT using a sequence identity cut-off of 0.95. BLASTP was used to search the protein sequences of the predicted unique genes set against the following databases: KEGG (Kyoto Encyclopedia of Genes and Genomes, Kanehisa et al. 2016), eggNOG (evolutionary genealogy of genes: Non-supervised Orthologous Groups, Jensen et al. 2008) and CAZy (Carbohydrate-Active Enzymes Database, Lombard et al. 2014), respectively, with a filter for E-values  $>1 \times 10^{-5}$ . Genes were annotated as a function of the CAZy, eggNOG or KEGG homologs with the lowest E-value.

*Estimating the abundance of genes/KEGG orthologous groups*

The abundance of each predicted gene from a sample was estimated according to the method of the contig coverage in sequence assembly. If  $R = \{r\}$  is the set of

assembled reads overlapping the locus of predicted gene  $g$  in a contig, abundance of

$g$  was calculated by the following formula (4) (Arumugam et al. 2011).

$$abundance(g) = \sum \frac{base\_overlap(g,r)}{base\_length(g)} \quad (4)$$

Predicted proteins were also aligned to proteins from KEGG database (blastp e-value < 1e-5). Each protein was assigned to the KEGG orthologous group (KO) containing the best hit result. From these alignments between the set of predicted proteins  $G = \{g\}$  from a sample and the set of KO reference proteins  $K = \{k\}$ , the abundance of each KO reference protein  $k$  in the sample was calculated as the sum abundance of all the related proteins abundance ( $g$ ).

*Significant differences of KO copy numbers of each MLG between groups*

The significant difference of KO copy numbers of each MLG between groups was obtained by the following method: First, the average abundance of single copy genes of the MLG in a sample was calculated and the copy number of one gene in the MLG was equal to the gene abundance divided by the average abundance of the single copy genes with the MLG sequences. The single copy gene of each MLG is defined as the gene in the contig contained in the MLG, with only one copy, and the clustering information of the genes refer to the results of CD-HIT previously mentioned. The copy number of KO is the sum of the copies of the genes it contained. Second, T-test was used to analyze the difference of gene/KO copy numbers among groups with

Benjamin & Hochberg correction and  $P$ -values  $< 0.001$  were recognized as significant differences.

#### *Function enrichment analysis among groups*

The significant difference of KO abundance among groups was obtained following the method:

First: Calculate OR-score for each function item (KO) on the following formula (5):

$$OR(k, G) = \frac{\sum_{s \in G} A_{sk} / \sum_{s \in G} \sum_{i \neq k} A_{si}}{\sum_{s \notin G} A_{sk} / \sum_{s \notin G} \sum_{i \neq k} A_{si}} \quad (5)$$

k: each KO;

s: each sample;

$A_{si}$ : abundance of KO i in sample s;

G: the checking group G;

OR(k,G): OR-score of KO k in checking group G.

Second: calculate chi-square and p-value (R packages, pchisq function)

Third: According to OR-score and p-values:

enriched: OR-score  $> 2$  and p-value  $< 0.05$

depleted: OR-score  $< 0.5$  and p-value  $< 0.05$

The same method also was used to analyze the significant difference of EC or eggNOG or CAZy function catalogs abundance among groups.

**Supplemental Figure Legends:**

**Supplemental Figure S1.** The pipeline in this study.

**Supplemental Figure S2.** The pipeline for the construction of the pan-metagenome.

**Supplemental Figure S3.** Relative abundances of the phyla present in samples for group S1 (green bar), S2 (blue bar), S3 (pink bar), and S4 (red bar) with increasing age from left to right for each group. Colors correspond to different phyla (see insert). The meanings of S1-4 are shown in the text and in supplemental\_ Table\_ S1.

**Supplemental Figure S4.** Taxonomic profile of panda gut bacterial phylotypes. (A) Relative taxa abundance plots for individuals from the four groups, summarized at the family level. Individuals are represented along the horizontal axis, and relative taxa frequency is denoted by the vertical axis. The rare and unclassified taxa are summarized as “Others”. (B) Relationships between relative abundances of dominant bacterial groups and increased ages of pandas. Linear regressions were used to test Spearman correlation between each taxon’s relative abundance and ages.

**Supplemental Figure S5.** Alpha diversity of the giant panda gut microbiota from birth to juvenile. Analyses were performed on 16S rRNA V3 region data, with a rarefaction depth of 6,044 reads per sample. The number of observed OTUs was

obtained for OTUs sharing  $\geq 97\%$  nucleotide sequence identity between all samples. A and B: The number of observed OTUs; C and D: Shannon diversity indices. The lines and squares inside boxes represent the median and mean, respectively. The meanings of S1-4 are shown in the text and in Table S1.

**Supplemental Figure S6.** Phylogenetic tree of *Clostridiales*-related lineages and OTUs in giant pandas. The prefix 'OTU' highlighted with red or blue text represents the OTUs present in giant pandas and the red text denotes the OTUs whose relative abundance reliably discriminated S1 and S3/4 samples. Muscle (Version: 3.8.31, parameter: -maxiters 16) was used for multiple sequences alignment and Treebest software (Version: treebest-1.9.2, parameter -b 1000) was used for constructing phylogenetic tree through NJ method. (Separate file)

**Supplemental Figure S7.** Taxonomic profile of the fungal phlotypes of the giant panda. A: Relative abundances of the phyla present in samples for group S1 (green bar), S2 (blue bar), S3 (pink bar), and S4 (red bar) with increasing age from left to right for each group. Colors correspond to phyla (see insert). The rare and unclassified taxa were summarized as "Others". B: The top 5 fungal classes in different groups. Individuals were represented along the horizontal axis, and relative taxa frequency was denoted by the vertical axis. The rare and unclassified taxa were summarized as "Others". The meanings of S1-4 are shown in the text and in Supplemental\_ Table\_ S1.

**Supplemental Figure S8.** Alpha diversity of the giant panda gut microbiota based on ITS-1. Analyses were performed on ITS-1 data, with a rarefaction depth of 8783 reads per sample. The number of observed OTUs was obtained for sharing  $\geq 97\%$  nucleotide sequence identity for all samples. In panel B, the lines and squares inside boxes represented the median and mean, respectively. The meanings of S1-4 are shown in the text and in Supplemental\_ Table\_ S1.

**Supplemental Figure S9.** PCA plot based on relative abundance at phylum (A), class (B), order (C), family (D), genus (E), or species (F) level of the fungal phylotypes of the giant panda.

**Supplemental Figure S10.** Principal coordinates analysis (PCoA) using unweighted (A) and weighted (B) UniFrac distances of ITS-1 data. The percentage of variation explained by the plotted principal coordinates was indicated on the axes. Each point corresponded to a community colored by age and diet (see the text and Supplemental\_ Table\_ S1).

**Supplemental Figure S11.** Metagenome linking group (MLG) assembly statistical result and phylogeny identification estimate. (A) Relation between MLG contig number and genome size at phylum level. (B) Homology relationship between MLG

and the nearest species at NT database, estimated by whole genome alignment coverage. (C) and (D) respectively represented the estimate ahead as (A) and (B) for four microbial classes (*Streptococcaceae*, *Enterobacteriaceae*, *Clostridiaceae*, *Lactobacillaceae*), which have high relative abundance according to the 16S rRNA data.

**Supplemental Figure S12.** Panda metagenome gene catalog annotation statistical result. (A) Non-redundant gene numbers for each group. The average unique gene number was 61190, 108150, 138911, and 181941 for S1, S2, S3 and S4, respectively. The unique gene number difference between any two groups was significant ( $P$ -value  $\leq 0.0259321$ ) except between S2 and S3 ( $P$ -value= 0.3675733) with Wilcoxon rank-sum test. (B) CAZy database annotation. (C) KEGG database annotation result. (D) eggNOG database annotation result.

**Supplemental Figure S13.** Principal component analysis on gene relative abundance of all genes (A), KEGG (B), eggNOG (C), and CAZy (D) database among the four groups. Samples at each group were clustered into a closer region. Cross marked for outliers.

**Supplemental Figure S14.** Gut unique genes classified giant pandas from different groups. To estimate the minimal number of top ranking age-discriminatory genes

required for prediction, the performance of the predictive model was evaluated with a 5-fold cross-validation approach and measured as cross-validation error following the random forest model of R package. The model was trained using relative abundance of the genes in the S1-S4 samples. (A): Distribution of 5 trials of 5-fold cross-validation error in random forest classification of giant pandas as the number of unique genes increases. The model was trained using relative abundance of the unique genes (681,167 genes) in 57 samples. The black line indicates the average of the five trials (grey lines) and the pink line marks the number of unique genes in the optimal set. (B): Box-and-whisker plot for the probability of different groups of giant pandas in the unique genes set. (C): Box-and-whisker plot for the probability of different groups of giant pandas in the genes training set according to the model in A.

**Supplemental Figure S15:** The giant panda fecal microbiome starch metabolism pathway based on the 1000 genes obtained from random forest shown in Fig 3. Blue indicates  $SCC > 0.4$ , red indicates  $-0.4 < SCC < 0.4$ , and grey indicates no ECs in giant pandas.

**Supplemental Figure S16.** The starch metabolism pathway for all genes present in the gut microbiomes of giant pandas. Blue: at least one KO existed in giant panda metagenome; Green: at least one KO had significant difference between one group and another group with  $P < 0.05$  (T-test); Red: at least one KO had a positive age-



related change (SCC>0.5) and higher abundance in group S3\4 than group 1. See Supplementary Table S11 for details.

**Supplemental Figure S17.**UPGMA-clustering dendrogram of CAZyme abundances.

Dietary compositions, taxonomy (at family level), and CAZy functional level1 are indicated by tip label colors.

**Supplemental Figure S18.** The carbohydrate-active enzymes (CAZy) functional compositions of giant pandas' and other mammals' microbiomes. Principal component analysis ordinations of predicted metagenomic potential function showed giant panda microbiomes were distinct from those of herbivores and carnivores but showed similarity to those of *Ursidae* when considering pathways involved in carbohydrate metabolism.

**Supplemental Figure S19.** Partial alignment of amylase gene sequences of tigers and giant pandas. Three heterozygosity sites existed in an intron of amylase of the giant panda and no heterozygosity sites in that of tigers with our PCR primers.

## Supplemental Table Legends

**Supplemental Table S1:** samples used in this study.

**Supplemental Table S2:** the OOB classification error rates of the 51 OTUs (Figure 1D).

**Supplemental Table S3:** the statistics of sequence and assembly information.

**Supplemental Table S4:** Pan-metagenome assembly index of giant panda gut microbiome.

**Supplemental Table S5:** The assembly and taxonomy information of MLGs.

**Supplemental Table S6:** The CheckM estimate for MLGs > 500 Kpb.

**Supplemental Table S7** (Microsoft Excel format): the statistics of KO copy number variation in MLG with significant difference among groups. (Separate file)

**Supplemental Table S8** (Microsoft Excel format): the annotation results of 1000 genes obtained from random forest. (Separate file)

**Supplemental Table S9:** The OOB classification error rates of the 1000 genes (Figure 3 and Supplementary Table S8).

**Supplemental Table S10** (Microsoft Excel format): The statistics of enrichment analysis and T\_test of KEGG, CAZy, and eggNOG databases. (Separate file).

**Supplemental Table S11** (Microsoft Excel format): The comparison of abundance of all ECs and KOs involving in starch pathway among groups. (Separate file)

**Supplemental Table S12:** The CAZy annotation of microbiome of S3/4 giant pandas and other mammals.

**Supplemental Table S13.**The qPCR primers for *TP53* and amylase genes.

**Supplemental Table S14.** Amylase copy numbers in individuals quantified using real time PCR. Mean estimates of each individual from three replicates are reported.

**Supplemental Table S15.** Amylase copy numbers found in whole genome data in *Carnivora* from NCBI.

### Supplemental References:

- Arumugam M, Raes J, Pelletier E, Le Paslier D, Yamada T, Mende DR, Fernandes GR, Tap J, Bruls T, Batto JM et al. 2011. Enterotypes of the human gut microbiome. *Nature* 473: 174-180.
- Bellemain E, Carlsen T, Brochmann C, Coissac E, Taberlet P, Kauserud H (2010). ITS as an environmental DNA barcode for fungi: an in silico approach reveals potential PCR biases. *BMC Microbiology* 10: 189.
- Caporaso JG, Kuczynski J, Stombaugh J, Bittinger K, Bushman FD, Costello EK et al (2010). QIIME allows analysis of high-throughput community sequencing data. *Nat Methods* 7: 335-336.
- Chen D, Yang Z, Chen X, Huang Y, Yin B, Guo F et al (2014). The effect of *Lactobacillus rhamnosus* hsryfm 1301 on the intestinal microbiota of a hyperlipidemic rat model. *BMC Complement Altern Med* 14: 386.
- Edgar RC (2013). UPARSE: highly accurate OTU sequences from microbial amplicon reads. *Nat Methods* 10: 996-998.
- Fu L, Niu B, Zhu Z, Wu S, Li W (2012). CD-HIT: accelerated for clustering the next-generation sequencing data. *Bioinformatics* 28: 3150-3152.
- Huson DH, Mitra S, Ruscheweyh H-J, Weber N, Schuster SC. 2011. Integrative analysis of environmental sequences using MEGAN4. *Genome Research* 21: 1552-1560.

- Jensen LJ, Julien P, Kuhn M, von Mering C, Muller J, Doerks T, Bork P. 2008. eggNOG: automated construction and annotation of orthologous groups of genes. *Nucleic Acids Res* 36: D250-254.
- Kanehisa M, Sato Y, Kawashima M, Furumichi M, Tanabe M. 2016. KEGG as a reference resource for gene and protein annotation. *Nucleic Acids Res* 44: D457-D462.
- Karlsson FH, Tremaroli V, Nookaew I, Bergstrom G, Behre CJ, Fagerberg B *et al* (2013). Gut metagenome in European women with normal, impaired and diabetic glucose control. *Nature* **498**: 99-103.
- Langmead B, Salzberg SL. 2012. Fast gapped-read alignment with Bowtie 2. *Nat Methods* 9: 357-359.
- Le Chatelier E, Nielsen T, Qin J, Prifti E, Hildebrand F, Falony G, Almeida M, Arumugam M, Batto JM, Kennedy S *et al*. 2013. Richness of human gut microbiome correlates with metabolic markers. *Nature* 500: 541-546.
- Li R, Yu C, Li Y, Lam TW, Yiu SM, Kristiansen K *et al* (2009). SOAP2: an improved ultrafast tool for short read alignment. *Bioinformatics* **25**: 1966-1967.
- Lombard V, Golaconda Ramulu H, Drula E, Coutinho PM, Henrissat B. 2014. The carbohydrate-active enzymes database (CAZy) in 2013. *Nucleic Acids Res* 42: D490-495.
- Luo R, Liu B, Xie Y, Li Z, Huang W, Yuan J *et al* (2012). SOAPdenovo2: an empirically improved memory-efficient short-read de novo assembler. *Gigascience* **1**: 18.

- Magoc T, Salzberg SL (2011). FLASH: fast length adjustment of short reads to improve genome assemblies. *Bioinformatics* **27**: 2957-2963.
- Qin J, Li Y, Cai Z, et al (2012). A metagenome-wide association study of gut microbiota in type 2 diabetes. *Nature* 490 (7418):55-60.
- Qin J, Li R, Raes J, Arumugam M, Burgdorf KS, Manichanh C, Nielsen T, Pons N, Levenez F, Yamada T et al. 2010. A human gut microbial gene catalogue established by metagenomic sequencing. *Nature* 464: 59-65.
- Wang Q, Garrity GM, Tiedje JM, Cole JR (2007). Naïve Bayesian Classifier for Rapid Assignment of rRNA Sequences into the New Bacterial Taxonomy. *Applied and Environmental Microbiology* **73**: 5261-5267.
- Zhu W, Lomsadze A, Borodovsky M. 2010. Ab initio gene identification in metagenomic sequences. *Nucleic Acids Res* 38: e132.

Figure S1

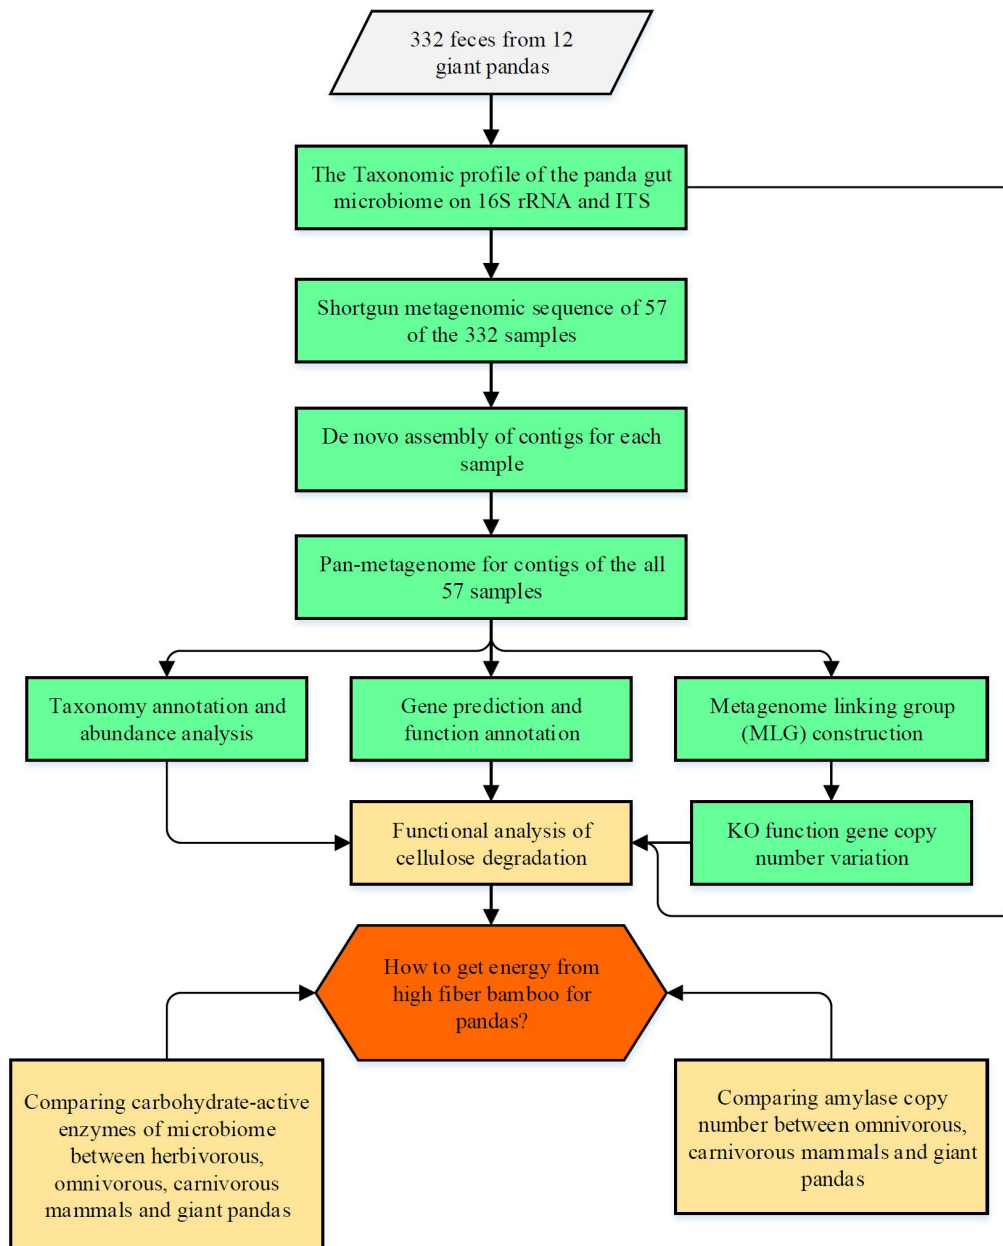

Figure S2

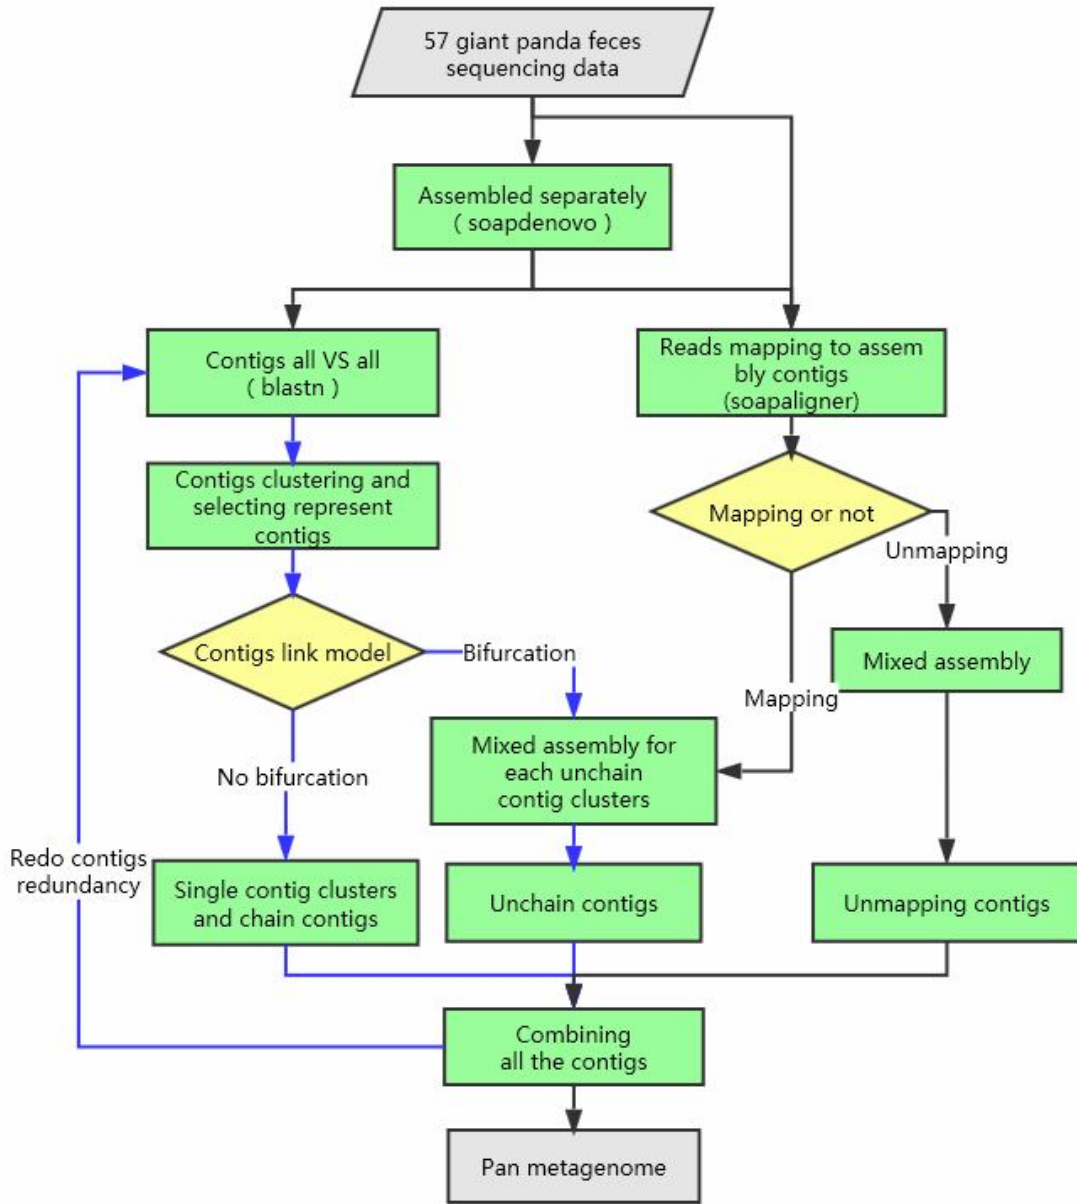

Figure S3

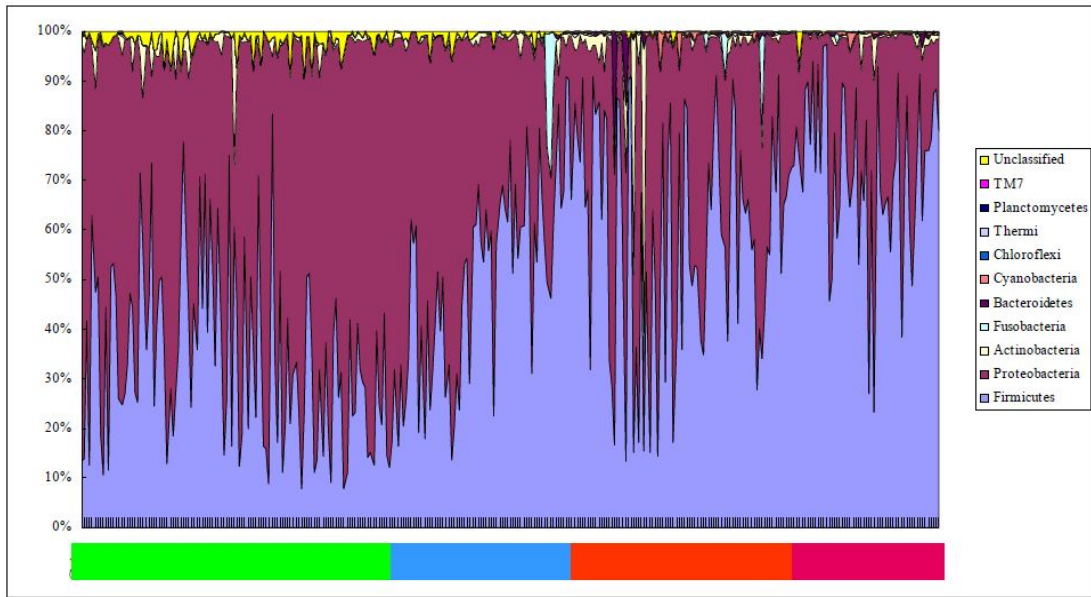



Figure S4

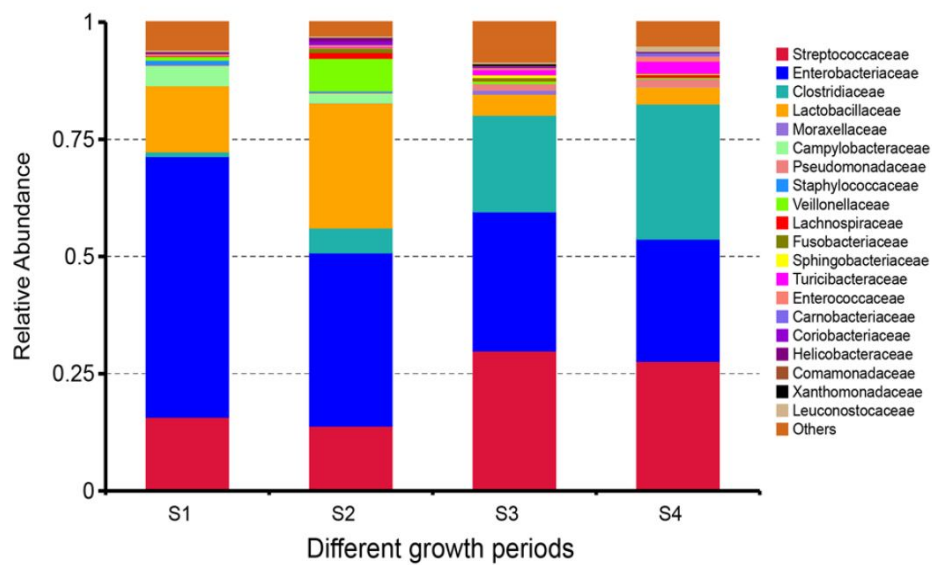

A

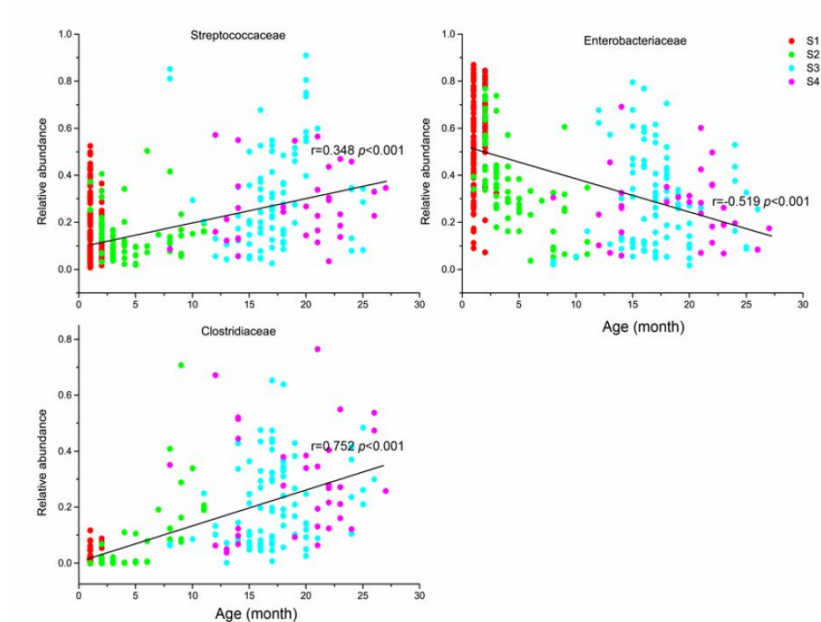

B

Figure S5

A

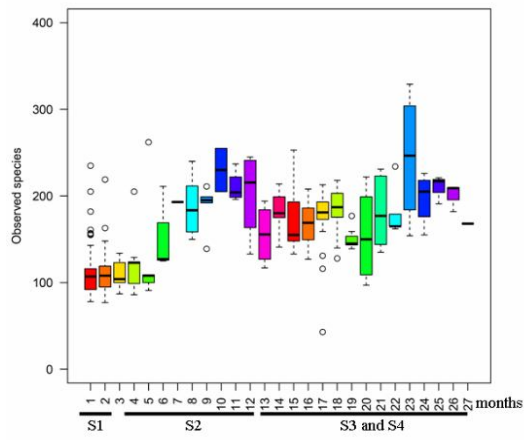

B

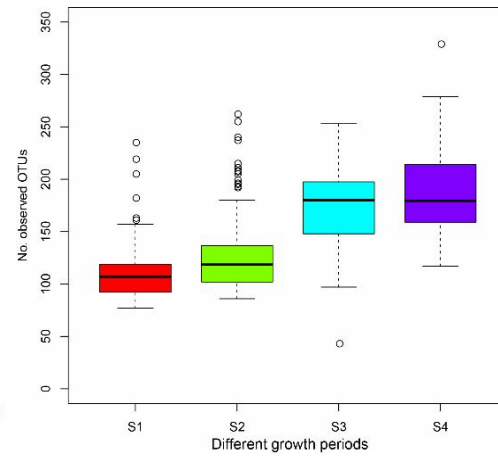

C

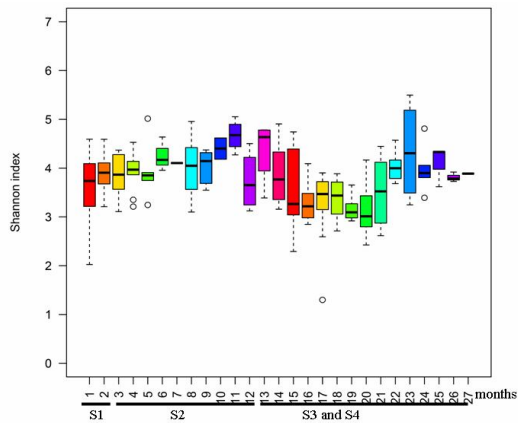

D

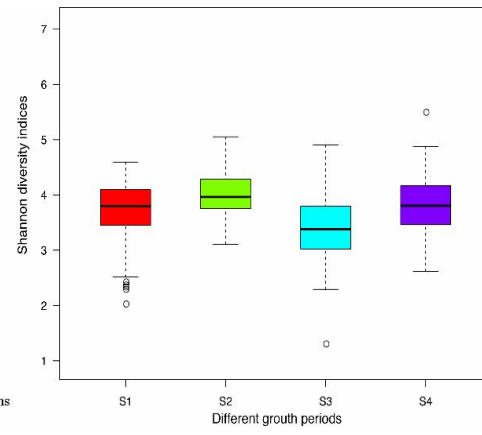

Figure S7

A

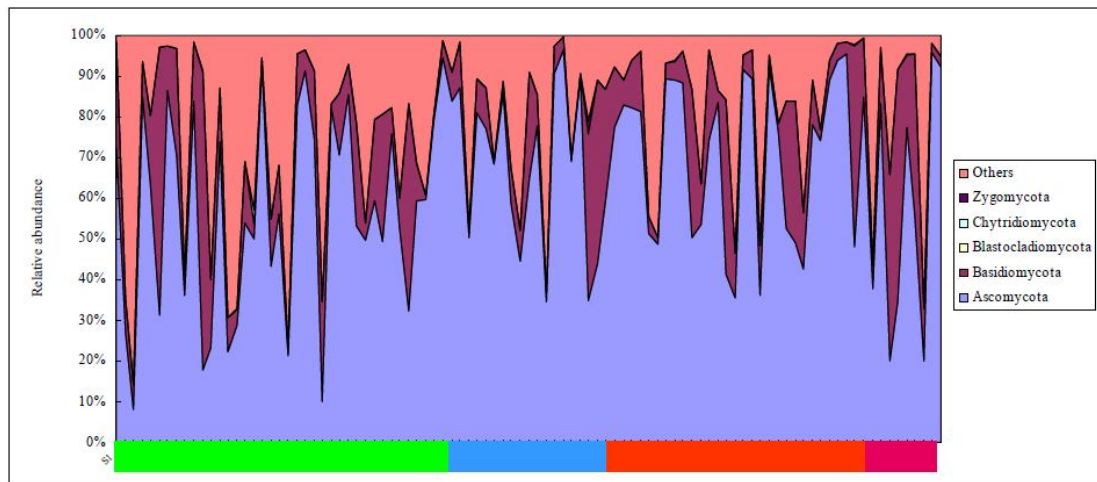

B

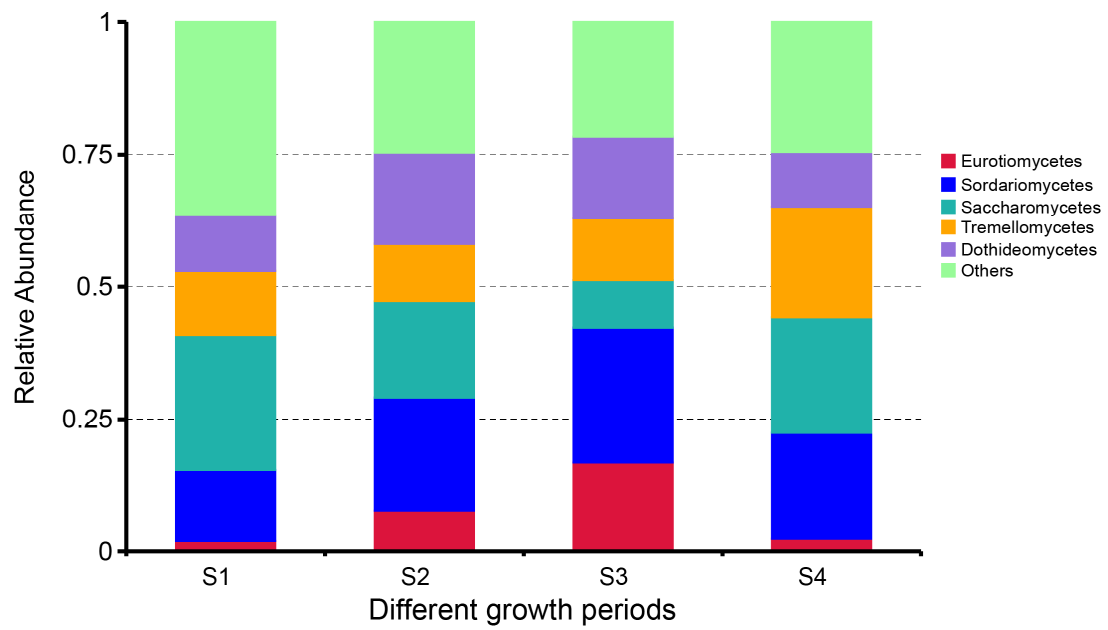

Figure S8

A

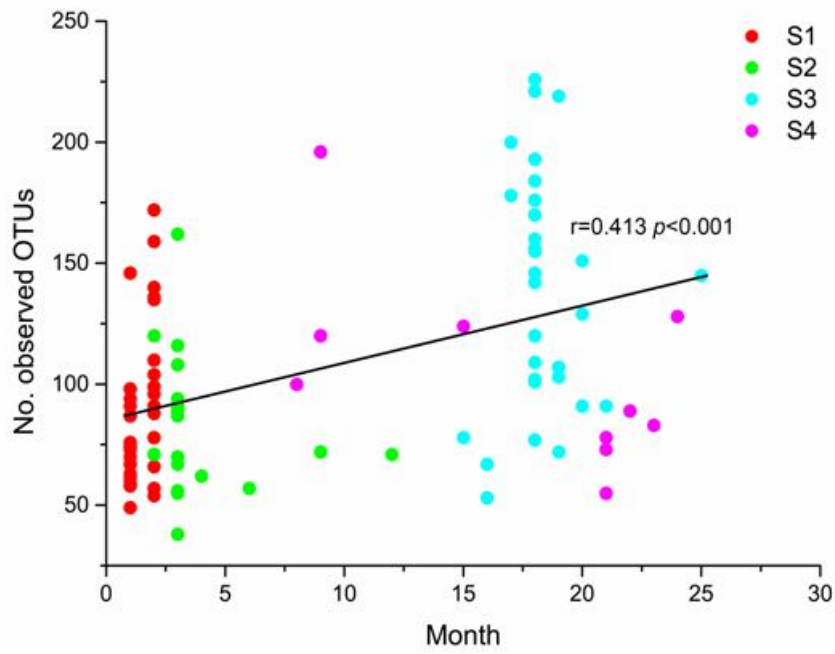

B

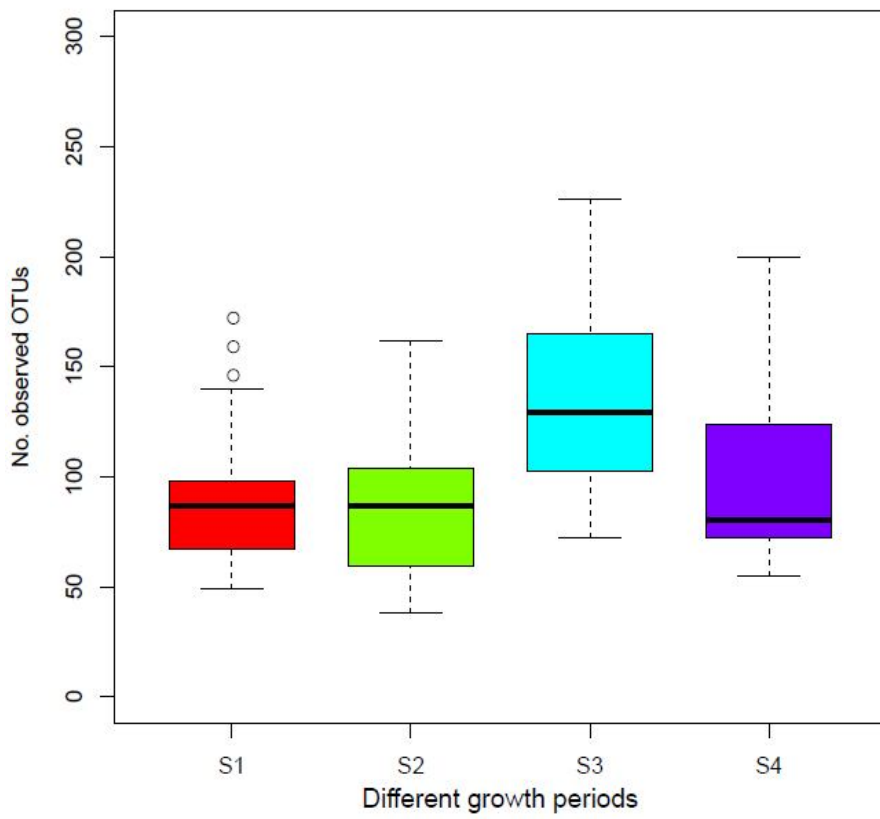

Figure S9

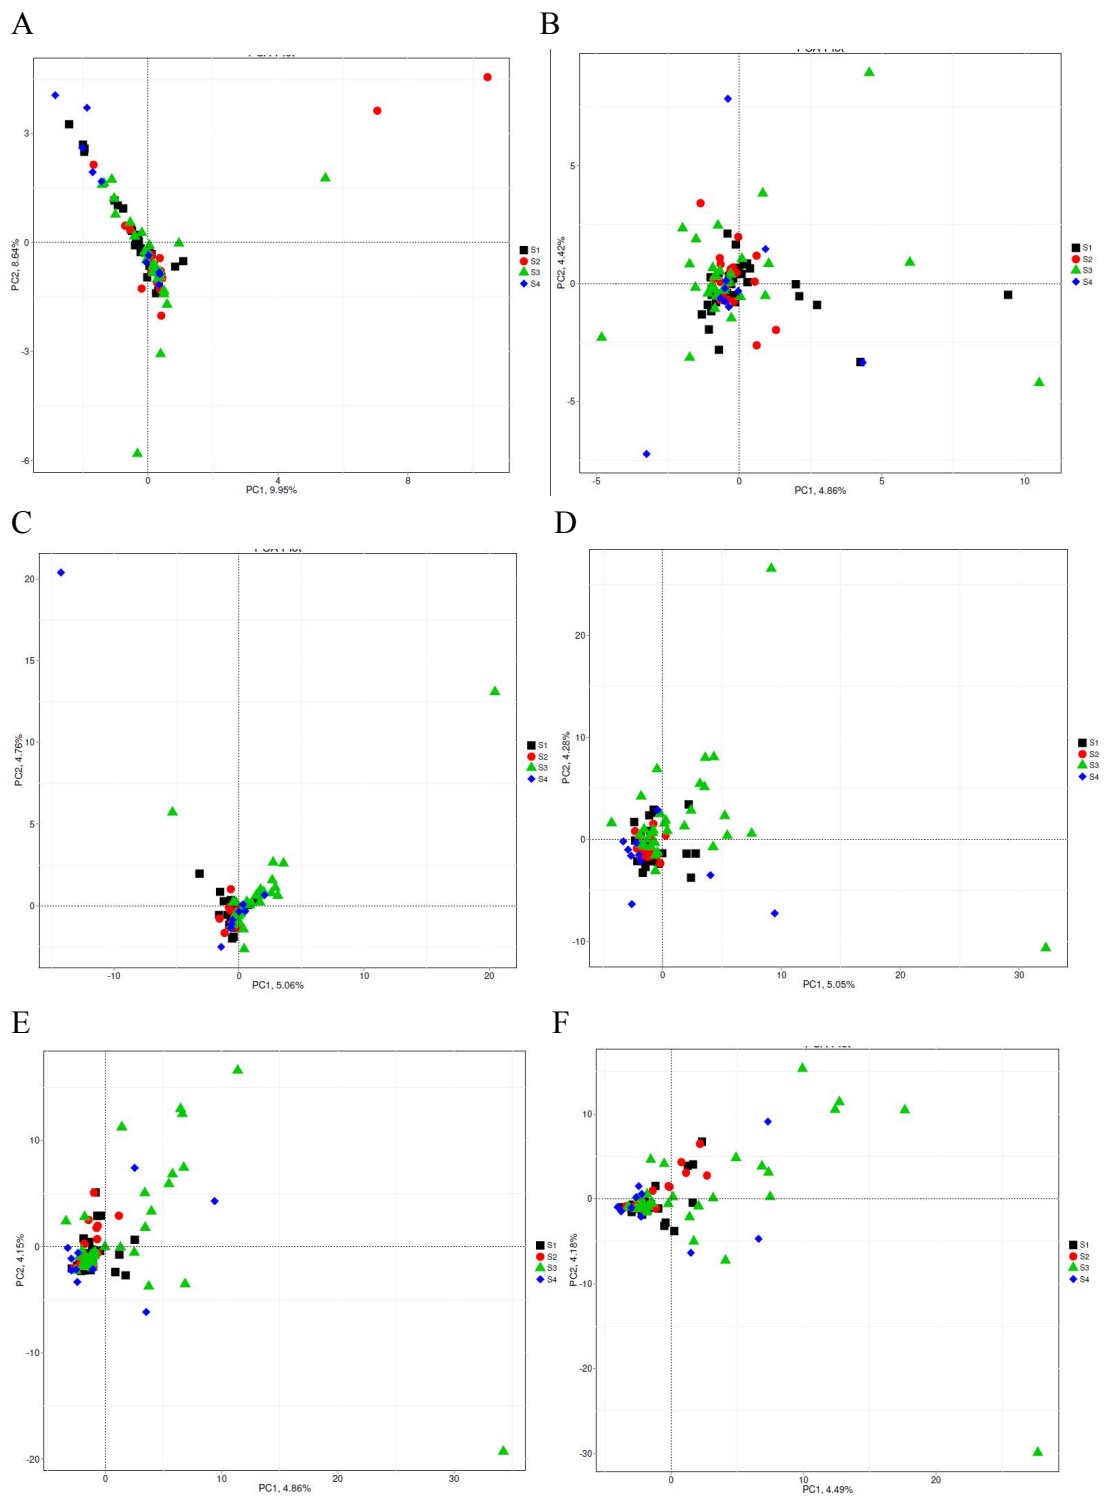

Figure S10

A

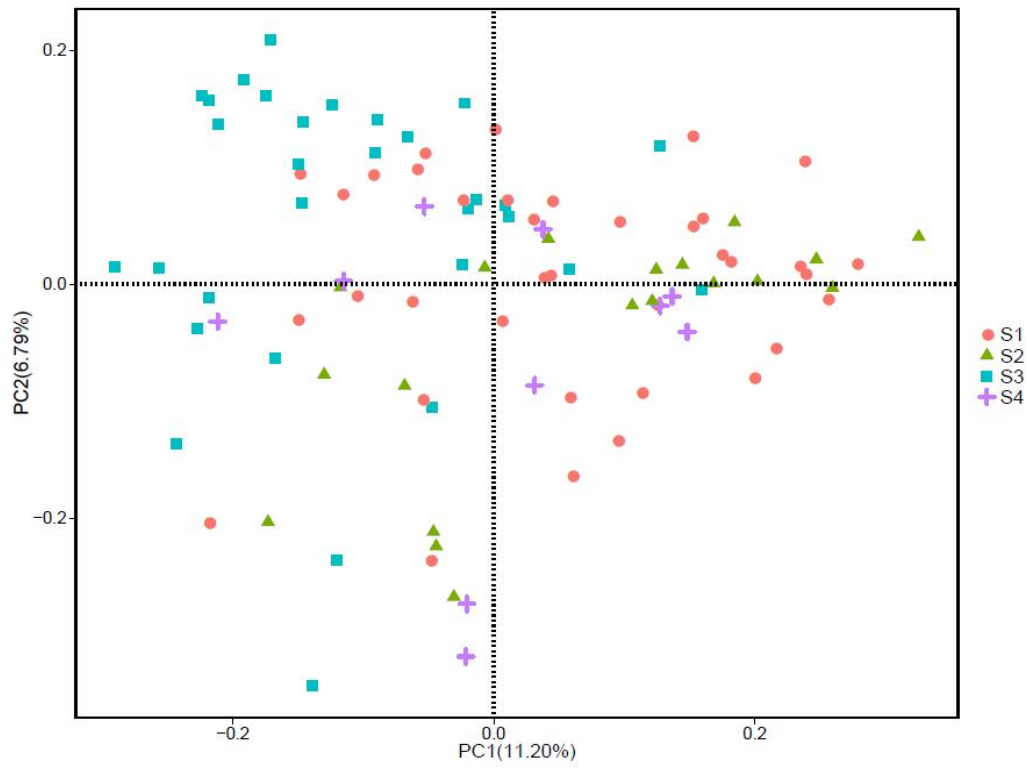

B

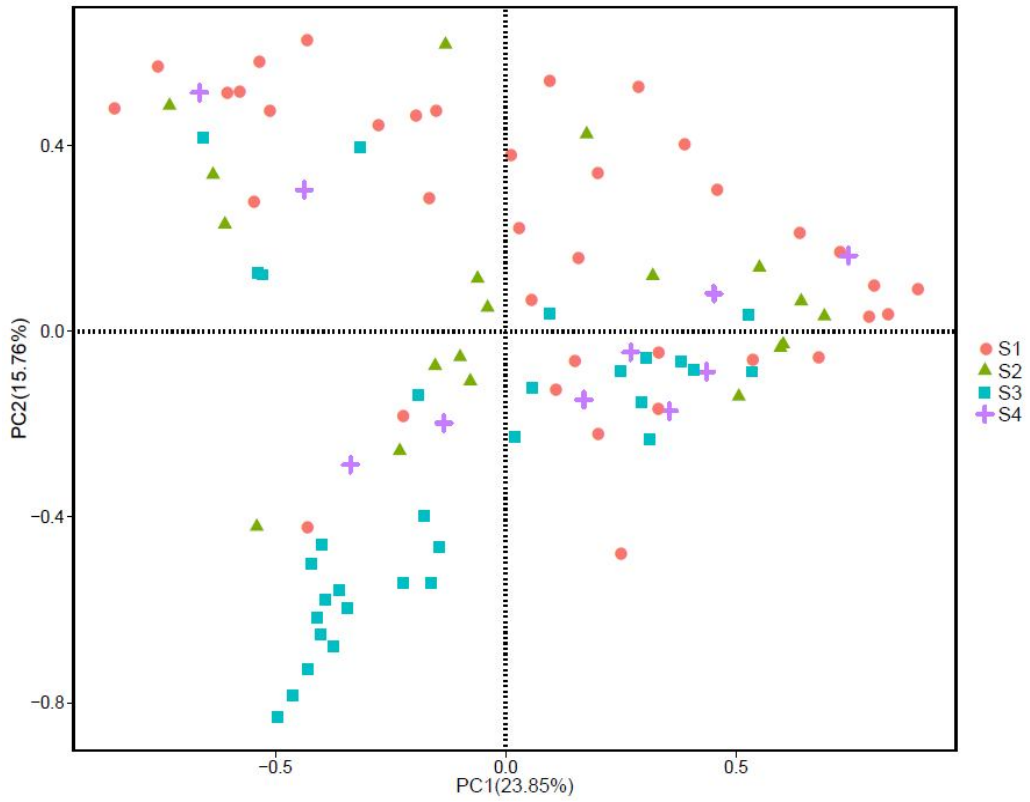

Figure S11

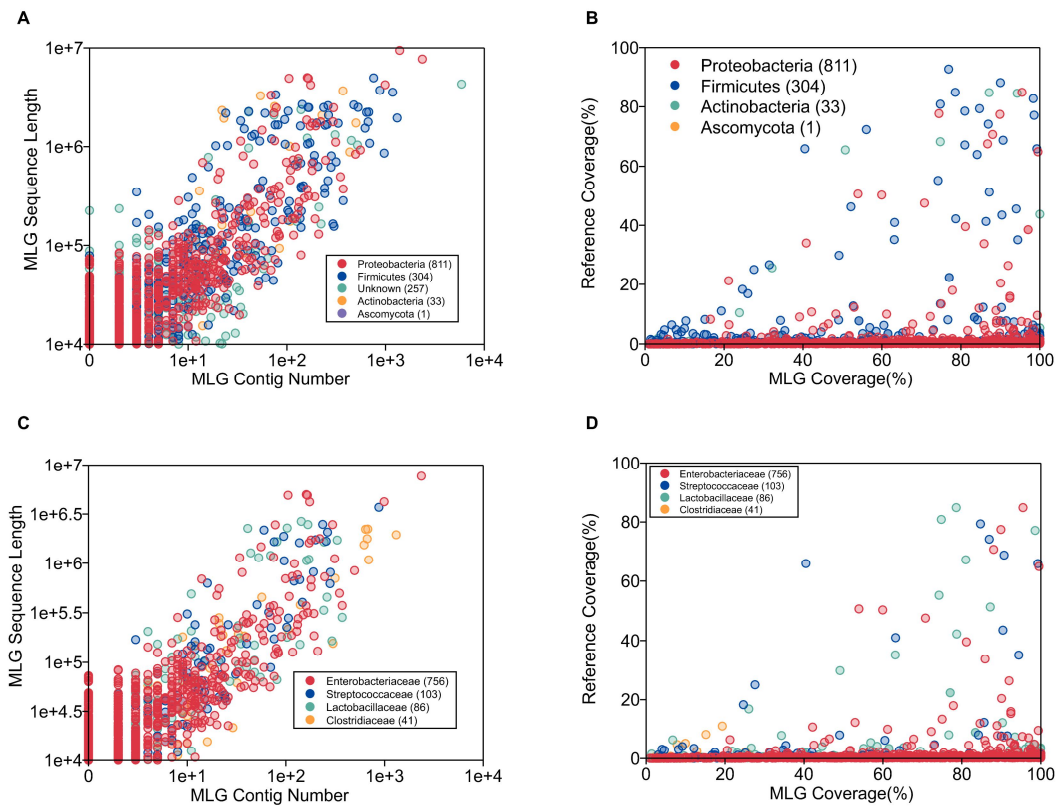

Figure S12

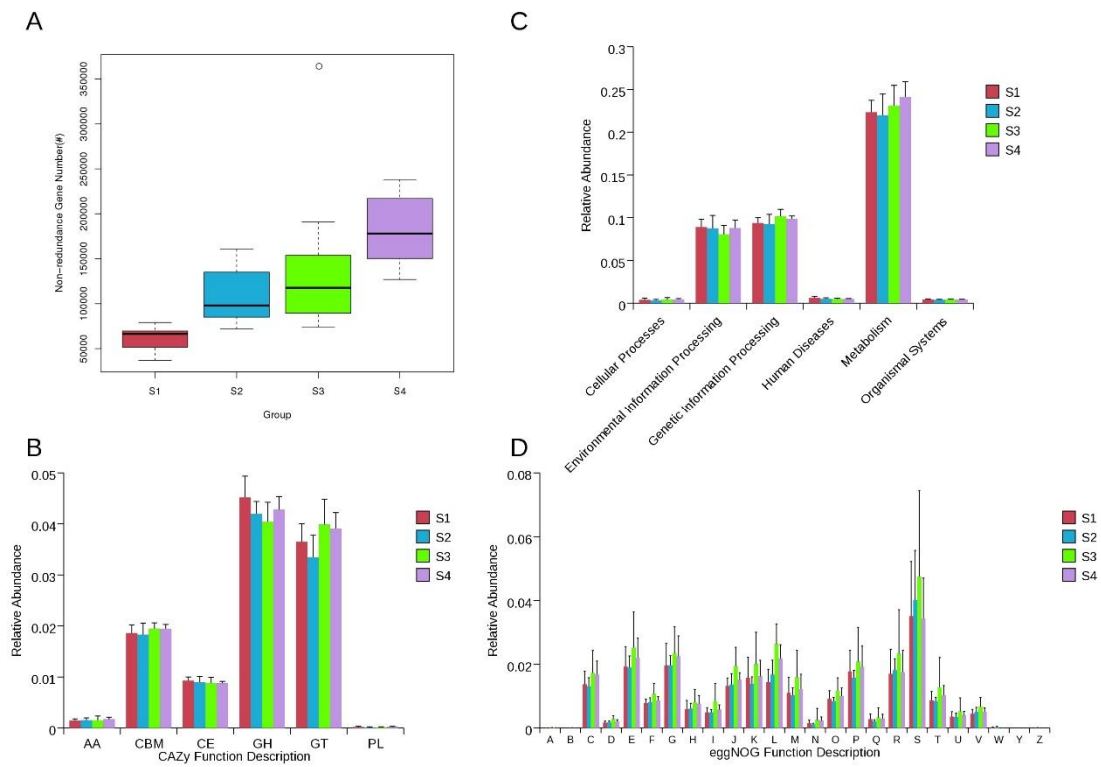



Figure S13

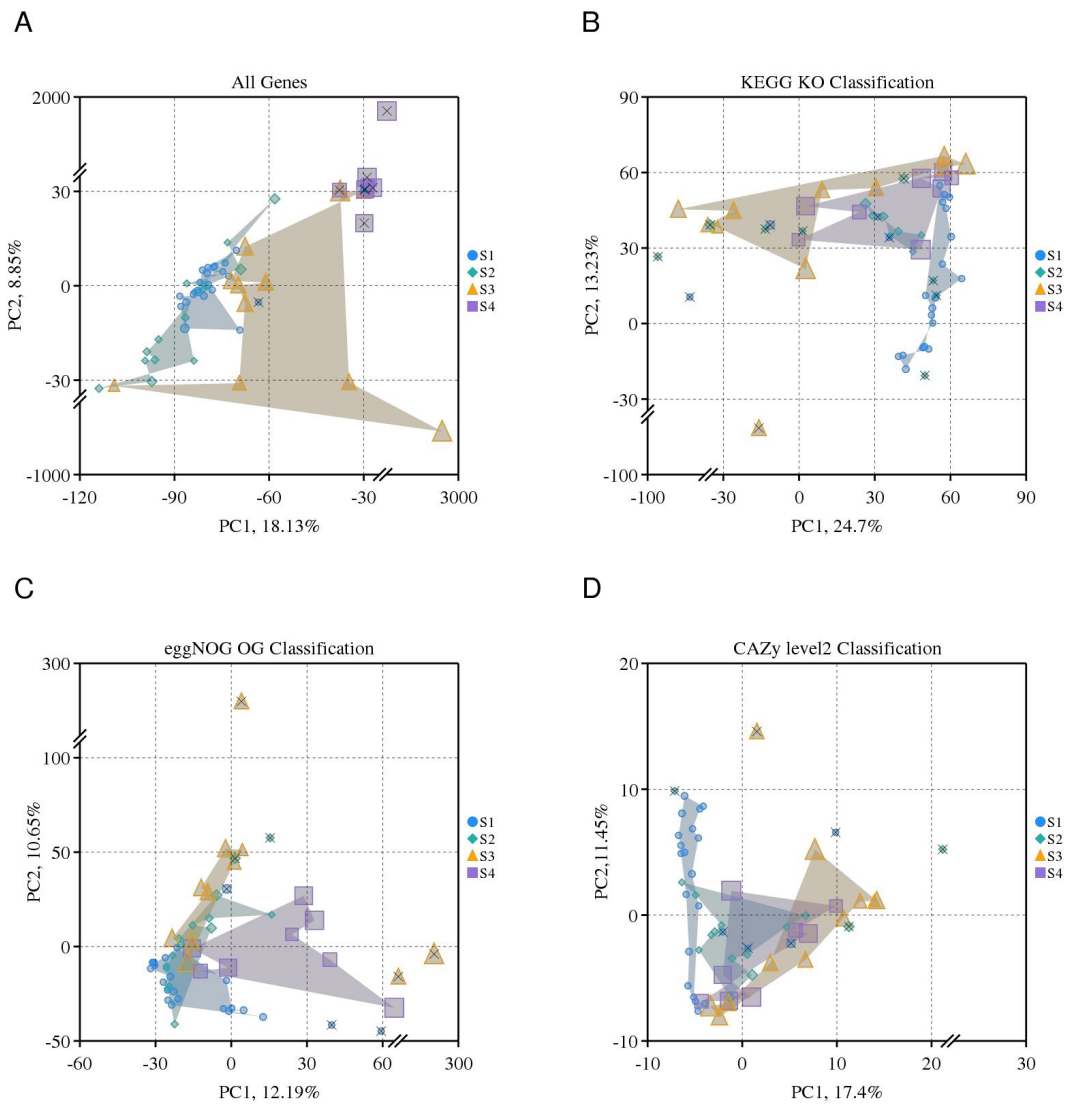

Figure S14

A

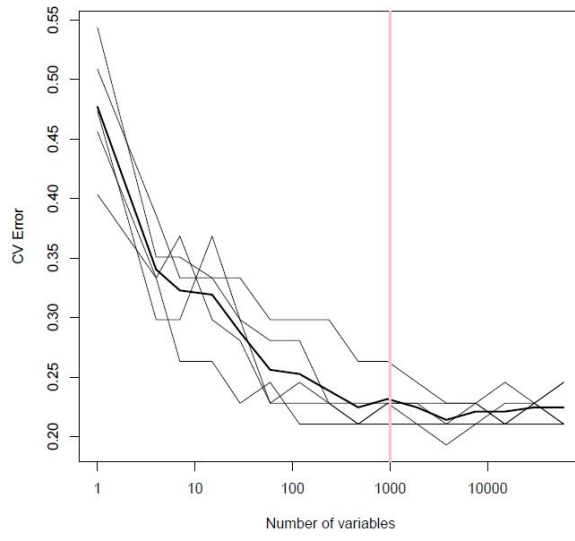

B

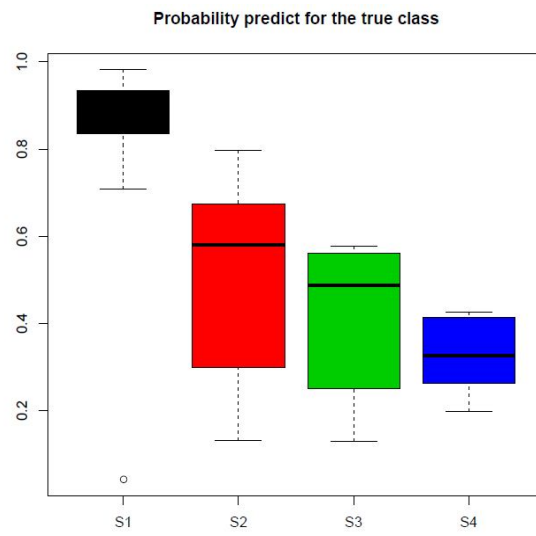

C

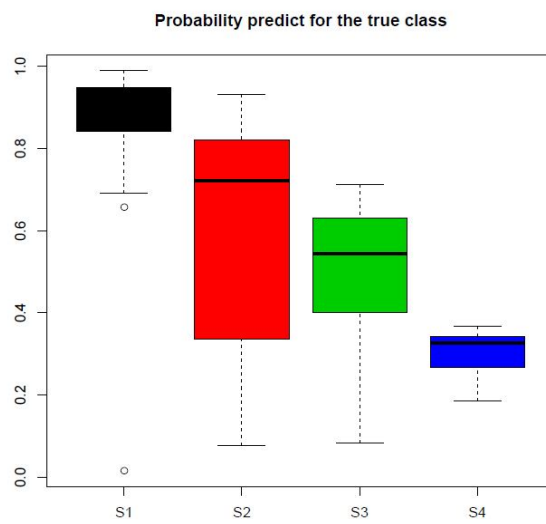





Figure S17

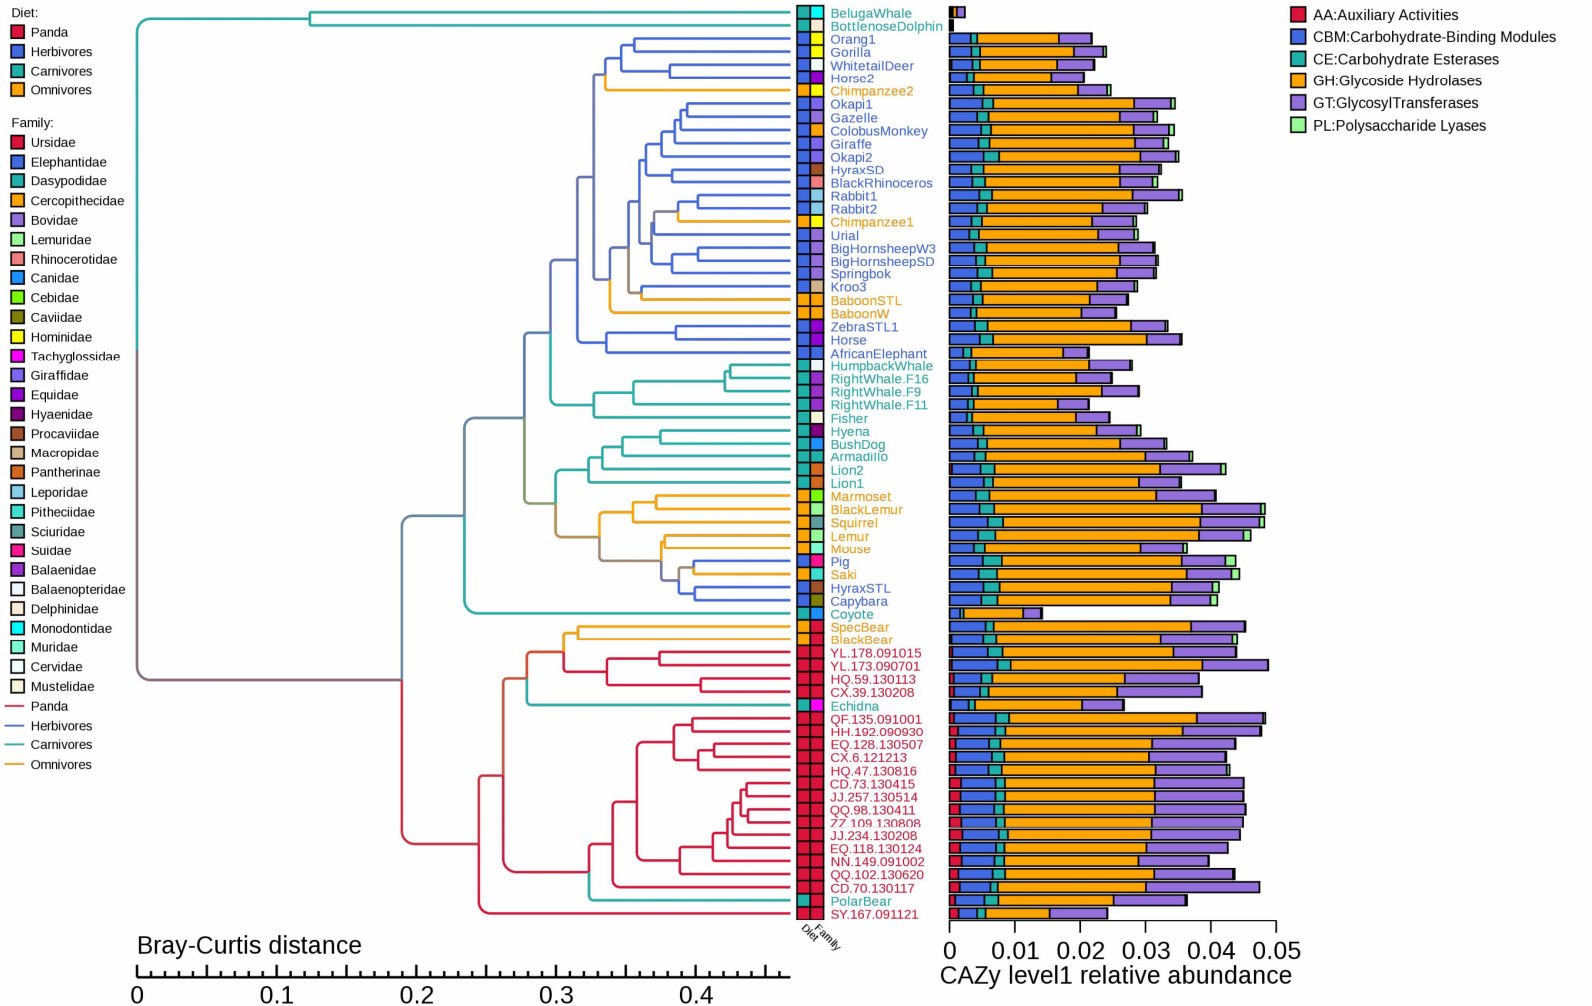

Figure S18

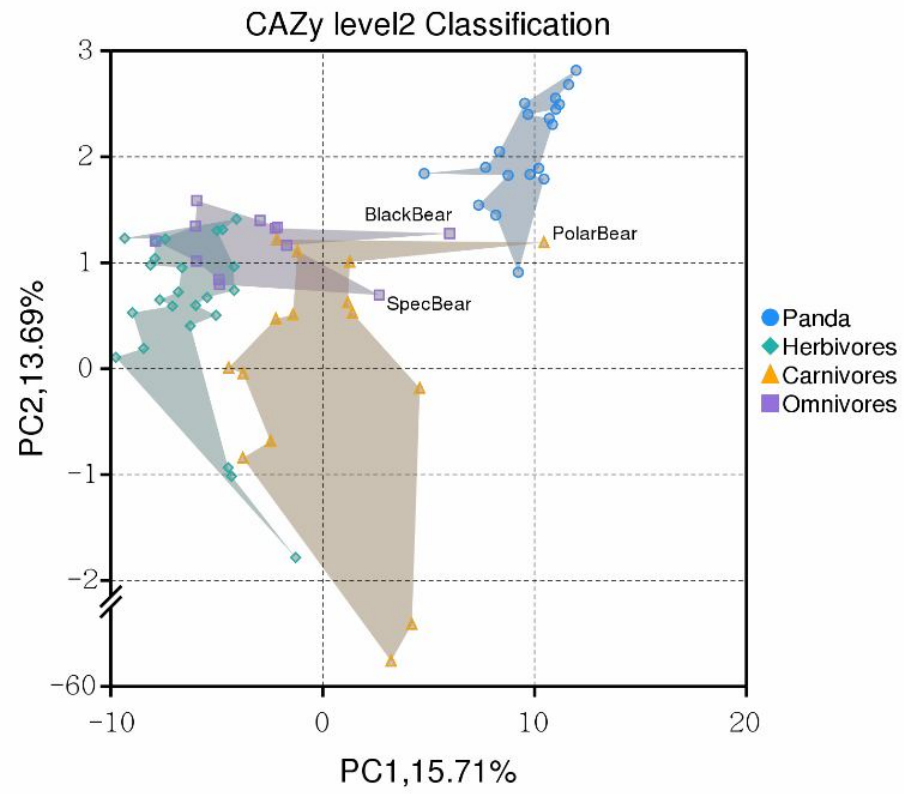

Figure S19

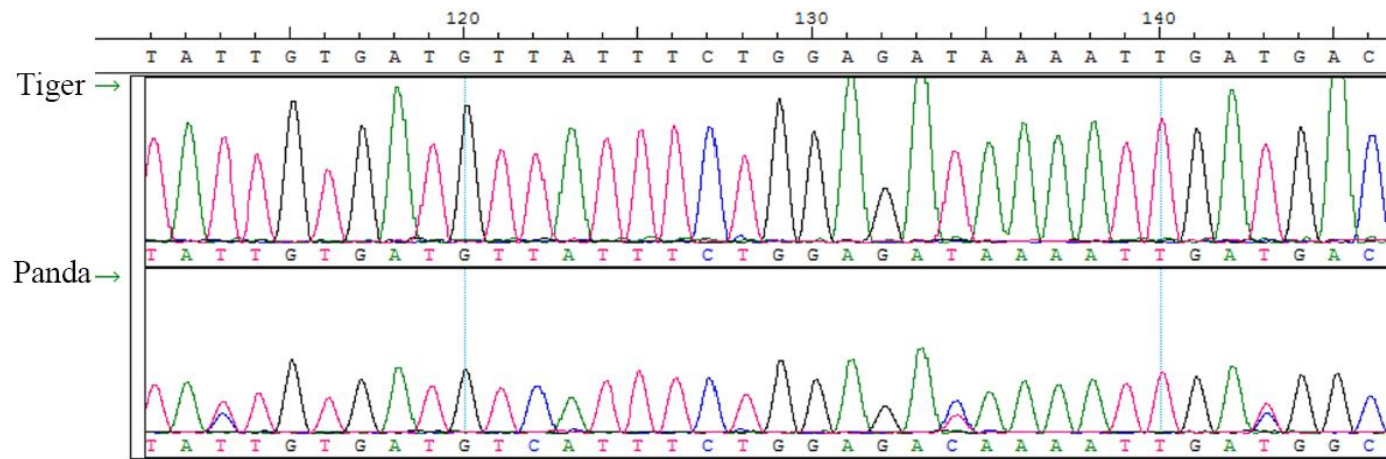

**Supplemental Table S1: samples used in this study.**

| Sample_ID    | Panda_ID  | Group_ID | Sex  | Studbook | Birth_date | Sampling_date<br>(yy/mon/day) | Shortgun_<br>sequencing | ITS_<br>sequencing | 16S_<br>Tags_number | ITS_<br>Tags_number |
|--------------|-----------|----------|------|----------|------------|-------------------------------|-------------------------|--------------------|---------------------|---------------------|
| CX.1.121026  | Chengxiao | S3       | Male | 825      | 2011/8/15  | 121026                        |                         |                    | 7,148               | 0                   |
| CX.10.121107 | Chengxiao | S3       | Male | 825      | 2011/8/15  | 121107                        |                         | Yes                | 8,520               | 41,018              |
| CX.11.121129 | Chengxiao | S3       | Male | 825      | 2011/8/15  | 121129                        |                         | Yes                | 8,743               | 30,470              |
| CX.12.121114 | Chengxiao | S3       | Male | 825      | 2011/8/15  | 121114                        |                         |                    | 8,737               | 0                   |
| CX.13.121112 | Chengxiao | S3       | Male | 825      | 2011/8/15  | 121112                        |                         |                    | 8,895               | 0                   |
| CX.15.121121 | Chengxiao | S3       | Male | 825      | 2011/8/15  | 121121                        |                         |                    | 8,138               | 0                   |
| CX.16.121207 | Chengxiao | S3       | Male | 825      | 2011/8/15  | 121207                        |                         |                    | 8,383               | 0                   |
| CX.17.121211 | Chengxiao | S3       | Male | 825      | 2011/8/15  | 121211                        |                         |                    | 8,019               | 0                   |
| CX.18.121202 | Chengxiao | S3       | Male | 825      | 2011/8/15  | 121202                        |                         |                    | 6,364               | 0                   |
| CX.19.121223 | Chengxiao | S3       | Male | 825      | 2011/8/15  | 121223                        |                         |                    | 6,467               | 0                   |
| CX.20.121225 | Chengxiao | S3       | Male | 825      | 2011/8/15  | 121225                        |                         |                    | 7,450               | 0                   |
| CX.22.121030 | Chengxiao | S3       | Male | 825      | 2011/8/15  | 121030                        |                         | Yes                | 8,010               | 22,267              |
| CX.25.130129 | Chengxiao | S3       | Male | 825      | 2011/8/15  | 130129                        |                         | Yes                | 8,339               | 56,723              |
| CX.27.130117 | Chengxiao | S3       | Male | 825      | 2011/8/15  | 130117                        |                         | Yes                | 6,056               | 33,263              |
| CX.29.130108 | Chengxiao | S3       | Male | 825      | 2011/8/15  | 130108                        |                         | Yes                | 8,116               | 56,395              |
| CX.3.121209  | Chengxiao | S3       | Male | 825      | 2011/8/15  | 121209                        |                         |                    | 7,931               | 0                   |
| CX.31.130113 | Chengxiao | S3       | Male | 825      | 2011/8/15  | 130113                        |                         | Yes                | 8,268               | 46,587              |
| CX.33.130202 | Chengxiao | S3       | Male | 825      | 2011/8/15  | 130202                        |                         | Yes                | 8,258               | 55,439              |
| CX.34.130125 | Chengxiao | S3       | Male | 825      | 2011/8/15  | 130125                        |                         | Yes                | 8,249               | 49,510              |
| CX.35.120827 | Chengxiao | S4       | Male | 825      | 2011/8/15  | 120827                        |                         |                    | 6,881               | 0                   |
| CX.36.130108 | Chengxiao | S3       | Male | 825      | 2011/8/15  | 130108                        |                         | Yes                | 7,973               | 58,643              |
| CX.38.130202 | Chengxiao | S3       | Male | 825      | 2011/8/15  | 130202                        |                         | Yes                | 6,044               | 34,670              |
| CX.39.130208 | Chengxiao | S3       | Male | 825      | 2011/8/15  | 130208                        | Yes                     | Yes                | 8,091               | 47,237              |
| CX.4.121221  | Chengxiao | S3       | Male | 825      | 2011/8/15  | 121221                        |                         | Yes                | 7,846               | 58,591              |
| CX.40.130401 | Chengxiao | S3       | Male | 825      | 2011/8/15  | 130401                        |                         | Yes                | 6,295               | 34,307              |
| CX.41.130402 | Chengxiao | S3       | Male | 825      | 2011/8/15  | 130402                        |                         |                    | 8,136               | 0                   |



|               |           |    |        |     |           |        |     |     |       |        |
|---------------|-----------|----|--------|-----|-----------|--------|-----|-----|-------|--------|
| CX.42.130403  | Chengxiao | S3 | Male   | 825 | 2011/8/15 | 130403 |     |     | 7,725 | 0      |
| CX.5.121203   | Chengxiao | S3 | Male   | 825 | 2011/8/15 | 121203 |     |     | 8,048 | 0      |
| CX.6.121213   | Chengxiao | S3 | Male   | 825 | 2011/8/15 | 121213 | Yes |     | 8,128 | 0      |
| CX.7.121208   | Chengxiao | S3 | Male   | 825 | 2011/8/15 | 121208 |     |     | 8,247 | 0      |
| CX.8.121209   | Chengxiao | S3 | Male   | 825 | 2011/8/15 | 121209 |     |     | 8,541 | 0      |
| CX.9.121215   | Chengxiao | S3 | Male   | 825 | 2011/8/15 | 121215 |     |     | 8,504 | 0      |
| CX.m1.110816  | Chengxiao | S1 | Male   | 825 | 2011/8/15 | 110816 | Yes | Yes | 6,582 | 51,757 |
| CX.m11.110903 | Chengxiao | S1 | Male   | 825 | 2011/8/15 | 110903 |     |     | 8,118 | 0      |
| CX.m12.110905 | Chengxiao | S1 | Male   | 825 | 2011/8/15 | 110905 |     |     | 8,275 | 0      |
| CX.m13.110907 | Chengxiao | S1 | Male   | 825 | 2011/8/15 | 110907 |     | Yes | 8,206 | 50,289 |
| CX.m14.110909 | Chengxiao | S1 | Male   | 825 | 2011/8/15 | 110909 |     |     | 8,358 | 0      |
| CX.m15.110911 | Chengxiao | S1 | Male   | 825 | 2011/8/15 | 110911 |     |     | 8,343 | 0      |
| CX.m16.110913 | Chengxiao | S1 | Male   | 825 | 2011/8/15 | 110913 |     |     | 8,274 | 0      |
| CX.m17.110915 | Chengxiao | S1 | Male   | 825 | 2011/8/15 | 110915 |     | Yes | 8,506 | 8,783  |
| CX.m18.110917 | Chengxiao | S1 | Male   | 825 | 2011/8/15 | 110917 | Yes |     | 8,316 | 0      |
| CX.m19.110919 | Chengxiao | S1 | Male   | 825 | 2011/8/15 | 110919 |     | Yes | 8,076 | 44,005 |
| CX.m22.110929 | Chengxiao | S1 | Male   | 825 | 2011/8/15 | 110929 |     | Yes | 7,781 | 57,488 |
| CX.m29.111025 | Chengxiao | S2 | Male   | 825 | 2011/8/15 | 111025 |     | Yes | 8,501 | 57,527 |
| CX.m30.111031 | Chengxiao | S2 | Male   | 825 | 2011/8/15 | 111031 |     | Yes | 8,578 | 21,881 |
| CX.m31.111101 | Chengxiao | S2 | Male   | 825 | 2011/8/15 | 111101 | Yes | Yes | 8,441 | 11,992 |
| CX.m6.110826  | Chengxiao | S1 | Male   | 825 | 2011/8/15 | 110826 |     | Yes | 8,116 | 62,653 |
| HQ.43.130202  | Heqi      | S3 | Female | 821 | 2011/8/12 | 130202 |     | Yes | 8,366 | 28,984 |
| HQ.44.130819  | Heqi      | S3 | Female | 821 | 2011/8/12 | 130819 |     | Yes | 7,993 | 0      |
| HQ.45.130815  | Heqi      | S3 | Female | 821 | 2011/8/12 | 130815 |     |     | 6,819 | 0      |
| HQ.46.130828  | Heqi      | S3 | Female | 821 | 2011/8/12 | 130828 |     | Yes | 7,672 | 0      |
| HQ.47.130816  | Heqi      | S3 | Female | 821 | 2011/8/12 | 130816 | Yes | Yes | 8,080 | 35,782 |
| HQ.48.130903  | Heqi      | S3 | Female | 821 | 2011/8/12 | 130903 |     | Yes | 7,816 | 0      |
| HQ.50.130129  | Heqi      | S4 | Female | 821 | 2011/8/12 | 130129 |     |     | 8,179 | 0      |
| HQ.51.130108  | Heqi      | S3 | Female | 821 | 2011/8/12 | 130108 |     |     | 7,458 | 11,614 |

|                |      |    |        |     |           |        |     |     |       |        |
|----------------|------|----|--------|-----|-----------|--------|-----|-----|-------|--------|
| HQ.52.130111   | Heqi | S3 | Female | 821 | 2011/8/12 | 130111 |     |     | 8,062 | 0      |
| HQ.53.130121   | Heqi | S3 | Female | 821 | 2011/8/12 | 130121 |     |     | 8,095 | 28,252 |
| HQ.56.130130   | Heqi | S3 | Female | 821 | 2011/8/12 | 130130 |     |     | 7,833 | 0      |
| HQ.58.130129   | Heqi | S4 | Female | 821 | 2011/8/12 | 130129 |     |     | 7,922 | 0      |
| HQ.59.130113   | Heqi | S3 | Female | 821 | 2011/8/12 | 130113 | Yes |     | 8,141 | 34,820 |
| HQ.m125.110819 | Heqi | S1 | Female | 821 | 2011/8/12 | 110819 | Yes |     | 8,432 | 0      |
| HQ.m126.110822 | Heqi | S1 | Female | 821 | 2011/8/12 | 110822 |     |     | 8,479 | 0      |
| HQ.m127.110824 | Heqi | S1 | Female | 821 | 2011/8/12 | 110824 |     |     | 7,191 | 0      |
| HQ.m128.110826 | Heqi | S1 | Female | 821 | 2011/8/12 | 110826 |     |     | 8,496 | 0      |
| HQ.m129.110828 | Heqi | S1 | Female | 821 | 2011/8/12 | 110828 |     |     | 8,362 | 0      |
| HQ.m130.110831 | Heqi | S1 | Female | 821 | 2011/8/12 | 110831 |     |     | 8,280 | 0      |
| HQ.m32.110901  | Heqi | S1 | Female | 821 | 2011/8/12 | 110901 |     | Yes | 8,817 | 35,686 |
| HQ.m33.110903  | Heqi | S1 | Female | 821 | 2011/8/12 | 110903 |     | Yes | 8,500 | 41,251 |
| HQ.m34.110907  | Heqi | S1 | Female | 821 | 2011/8/12 | 110907 | Yes |     | 8,647 | 0      |
| HQ.m37.110912  | Heqi | S1 | Female | 821 | 2011/8/12 | 110912 |     | Yes | 8,461 | 16,054 |
| HQ.m38.110915  | Heqi | S1 | Female | 821 | 2011/8/12 | 110915 |     | Yes | 8,663 | 23,051 |
| HQ.m39.110917  | Heqi | S1 | Female | 821 | 2011/8/12 | 110917 |     |     | 8,471 | 0      |
| HQ.m40.110919  | Heqi | S1 | Female | 821 | 2011/8/12 | 110919 |     | Yes | 8,453 | 18,071 |
| HQ.m41.110921  | Heqi | S1 | Female | 821 | 2011/8/12 | 110921 |     | Yes | 8,604 | 47,594 |
| HQ.m42.110923  | Heqi | S1 | Female | 821 | 2011/8/12 | 110923 |     |     | 8,324 | 0      |
| HQ.m43.110926  | Heqi | S1 | Female | 821 | 2011/8/12 | 110926 |     | Yes | 8,363 | 22,522 |
| HQ.m44.110928  | Heqi | S1 | Female | 821 | 2011/8/12 | 110928 |     | Yes | 8,624 | 50,310 |
| HQ.m45.110930  | Heqi | S1 | Female | 821 | 2011/8/12 | 110930 |     | Yes | 8,481 | 55,005 |
| HQ.m46.111002  | Heqi | S1 | Female | 821 | 2011/8/12 | 111002 |     | Yes | 8,636 | 56,724 |
| HQ.m47.111005  | Heqi | S1 | Female | 821 | 2011/8/12 | 111005 |     |     | 8,736 | 0      |
| HQ.m48.111008  | Heqi | S1 | Female | 821 | 2011/8/12 | 111008 |     |     | 8,897 | 0      |
| HQ.m49.111012  | Heqi | S1 | Female | 821 | 2011/8/12 | 111012 |     |     | 8,733 | 0      |
| HQ.m50.111015  | Heqi | S2 | Female | 821 | 2011/8/12 | 111015 |     |     | 8,645 | 0      |
| HQ.m52.111023  | Heqi | S2 | Female | 821 | 2011/8/12 | 111023 |     |     | 8,510 | 0      |

|                |          |    |        |     |           |        |     |     |       |        |
|----------------|----------|----|--------|-----|-----------|--------|-----|-----|-------|--------|
| HQ.m53.111027  | Heqi     | S2 | Female | 821 | 2011/8/12 | 111027 |     | Yes | 8,277 | 55,964 |
| HQ.m54.111030  | Heqi     | S2 | Female | 821 | 2011/8/12 | 111030 |     | Yes | 8,304 | 51,099 |
| HQ.m55.111101  | Heqi     | S2 | Female | 821 | 2011/8/12 | 111101 | Yes | Yes | 8,355 | 44,064 |
| HQ.m56.111104  | Heqi     | S2 | Female | 821 | 2011/8/12 | 111104 |     | Yes | 8,392 | 50,450 |
| CD.66.130207   | Chengda  | S3 | Female | 824 | 2011/8/15 | 130207 |     | Yes | 8,272 | 54,322 |
| CD.68.130109   | Chengda  | S3 | Female | 824 | 2011/8/15 | 130109 |     | Yes | 8,120 | 61,572 |
| CD.70.130117   | Chengda  | S3 | Female | 824 | 2011/8/15 | 130117 | Yes | Yes | 8,217 | 30,489 |
| CD.71.130104   | Chengda  | S3 | Female | 824 | 2011/8/15 | 130104 |     | Yes | 8,327 | 39,348 |
| CD.73.130415   | Chengda  | S4 | Female | 824 | 2011/8/15 | 130415 | Yes | Yes | 7,287 | 21,174 |
| CD.m120.111012 | Chengda  | S1 | Female | 824 | 2011/8/15 | 111012 |     |     | 8,480 | 0      |
| CD.m121.111017 | Chengda  | S2 | Female | 824 | 2011/8/15 | 111017 | Yes | Yes | 8,476 | 58,248 |
| CD.m122.111023 | Chengda  | S2 | Female | 824 | 2011/8/15 | 111023 |     |     | 8,475 | 0      |
| CD.m189.111102 | Chengda  | S2 | Female | 824 | 2011/8/15 | 111102 |     | Yes | 8,682 | 58,351 |
| CD.m65.110830  | Chengda  | S1 | Female | 824 | 2011/8/15 | 110830 |     |     | 7,723 | 0      |
| CD.m66.110902  | Chengda  | S1 | Female | 824 | 2011/8/15 | 110902 |     |     | 8,732 | 0      |
| CD.m67.110904  | Chengda  | S1 | Female | 824 | 2011/8/15 | 110904 |     |     | 8,513 | 0      |
| CD.m69.110908  | Chengda  | S1 | Female | 824 | 2011/8/15 | 110908 |     |     | 7,422 | 0      |
| CD.m70.110910  | Chengda  | S1 | Female | 824 | 2011/8/15 | 110910 |     |     | 8,715 | 0      |
| CD.m71.110912  | Chengda  | S1 | Female | 824 | 2011/8/15 | 110912 | Yes | Yes | 8,180 | 18,388 |
| CD.m72.110915  | Chengda  | S1 | Female | 824 | 2011/8/15 | 110915 |     | Yes | 8,503 | 55,155 |
| CD.m73.110918  | Chengda  | S1 | Female | 824 | 2011/8/15 | 110918 |     |     | 8,825 | 0      |
| CD.m74.110924  | Chengda  | S1 | Female | 824 | 2011/8/15 | 110924 |     | Yes | 8,576 | 17,547 |
| CD.m75.110927  | Chengda  | S1 | Female | 824 | 2011/8/15 | 110927 |     | Yes | 8,894 | 13,686 |
| CD.m76.110930  | Chengda  | S1 | Female | 824 | 2011/8/15 | 110930 |     | Yes | 8,791 | 11,538 |
| CD.m77.111002  | Chengda  | S1 | Female | 824 | 2011/8/15 | 111002 | Yes | Yes | 8,643 | 23,412 |
| CD.m78.111005  | Chengda  | S1 | Female | 824 | 2011/8/15 | 111005 |     |     | 8,325 | 0      |
| CD.m79.111008  | Chengda  | S1 | Female | 824 | 2011/8/15 | 111008 |     |     | 8,210 | 0      |
| QQ.101.130916  | Qiaoqiao | S4 | Male   | 815 | 2011/8/4  | 130916 |     |     | 7,896 | 0      |

|                |          |    |        |     |           |        |     |  |       |   |
|----------------|----------|----|--------|-----|-----------|--------|-----|--|-------|---|
| QQ.102.130620  | Qiaoqiao | S4 | Male   | 815 | 2011/8/4  | 130620 | Yes |  | 8,059 | 0 |
| QQ.103.130424  | Qiaoqiao | S4 | Male   | 815 | 2011/8/4  | 130424 |     |  | 8,094 | 0 |
| QQ.83.130314   | Qiaoqiao | S3 | Male   | 815 | 2011/8/4  | 130314 |     |  | 6,835 | 0 |
| QQ.85.130322   | Qiaoqiao | S3 | Male   | 815 | 2011/8/4  | 130322 |     |  | 7,969 | 0 |
| QQ.86.130108   | Qiaoqiao | S3 | Male   | 815 | 2011/8/4  | 130108 |     |  | 7,874 | 0 |
| QQ.87.130409   | Qiaoqiao | S3 | Male   | 815 | 2011/8/4  | 130409 |     |  | 6,984 | 0 |
| QQ.92.130119   | Qiaoqiao | S3 | Male   | 815 | 2011/8/4  | 130119 |     |  | 8,054 | 0 |
| QQ.97.130418   | Qiaoqiao | S4 | Male   | 815 | 2011/8/4  | 130418 |     |  | 7,784 | 0 |
| QQ.98.130411   | Qiaoqiao | S4 | Male   | 815 | 2011/8/4  | 130411 | Yes |  | 8,047 | 0 |
| QQ.m135.110817 | Qiaoqiao | S1 | Male   | 815 | 2011/8/4  | 110817 | Yes |  | 7,913 | 0 |
| QQ.m137.110823 | Qiaoqiao | S1 | Male   | 815 | 2011/8/4  | 110823 |     |  | 8,126 | 0 |
| QQ.m139.110829 | Qiaoqiao | S1 | Male   | 815 | 2011/8/4  | 110829 |     |  | 8,699 | 0 |
| QQ.m140.110901 | Qiaoqiao | S1 | Male   | 815 | 2011/8/4  | 110901 |     |  | 8,337 | 0 |
| QQ.m142.110907 | Qiaoqiao | S1 | Male   | 815 | 2011/8/4  | 110907 |     |  | 7,119 | 0 |
| QQ.m144.110913 | Qiaoqiao | S1 | Male   | 815 | 2011/8/4  | 110913 |     |  | 8,595 | 0 |
| QQ.m146.110922 | Qiaoqiao | S1 | Male   | 815 | 2011/8/4  | 110922 |     |  | 8,630 | 0 |
| QQ.m148.110930 | Qiaoqiao | S1 | Male   | 815 | 2011/8/4  | 110930 |     |  | 8,547 | 0 |
| QQ.m150.111008 | Qiaoqiao | S2 | Male   | 815 | 2011/8/4  | 111008 |     |  | 8,261 | 0 |
| QQ.m151.111015 | Qiaoqiao | S2 | Male   | 815 | 2011/8/4  | 111015 |     |  | 8,627 | 0 |
| QQ.m152.111015 | Qiaoqiao | S2 | Male   | 815 | 2011/8/4  | 111015 | Yes |  | 8,564 | 0 |
| EQ.118.130124  | Erqiao   | S3 | Female | 823 | 2011/8/23 | 130124 | Yes |  | 7,596 | 0 |
| EQ.124.130313  | Erqiao   | S3 | Female | 823 | 2011/8/23 | 130313 |     |  | 7,775 | 0 |
| EQ.125.130315  | Erqiao   | S4 | Female | 823 | 2011/8/23 | 130315 |     |  | 7,797 | 0 |
| EQ.126.130105  | Erqiao   | S3 | Female | 823 | 2011/8/23 | 130105 |     |  | 7,874 | 0 |
| EQ.128.130507  | Erqiao   | S4 | Female | 823 | 2011/8/23 | 130507 | Yes |  | 8,339 | 0 |
| EQ.m108.110828 | Erqiao   | S1 | Female | 823 | 2011/8/23 | 110828 |     |  | 8,335 | 0 |
| EQ.m114.110825 | Erqiao   | S1 | Female | 823 | 2011/8/23 | 110825 | Yes |  | 7,265 | 0 |
| EQ.m118.110830 | Erqiao   | S1 | Female | 823 | 2011/8/23 | 110830 |     |  | 8,306 | 0 |

|                |        |    |        |     |           |        |     |     |       |        |
|----------------|--------|----|--------|-----|-----------|--------|-----|-----|-------|--------|
| EQ.m154.110902 | Erqiao | S1 | Female | 823 | 2011/8/23 | 110902 |     |     | 8,602 | 0      |
| EQ.m155.110909 | Erqiao | S1 | Female | 823 | 2011/8/23 | 110909 |     |     | 8,537 | 0      |
| EQ.m156.110915 | Erqiao | S1 | Female | 823 | 2011/8/23 | 110915 |     |     | 8,713 | 0      |
| EQ.m157.110920 | Erqiao | S1 | Female | 823 | 2011/8/23 | 110920 |     |     | 8,774 | 0      |
| EQ.m158.110925 | Erqiao | S1 | Female | 823 | 2011/8/23 | 110925 |     |     | 8,773 | 0      |
| EQ.m159.110929 | Erqiao | S1 | Female | 823 | 2011/8/23 | 110929 |     |     | 8,717 | 0      |
| EQ.m160.111002 | Erqiao | S1 | Female | 823 | 2011/8/23 | 111002 |     |     | 8,621 | 0      |
| EQ.m161.111006 | Erqiao | S1 | Female | 823 | 2011/8/23 | 111006 |     |     | 8,726 | 0      |
| EQ.m162.111011 | Erqiao | S1 | Female | 823 | 2011/8/23 | 111011 |     |     | 8,810 | 0      |
| EQ.m163.111017 | Erqiao | S1 | Female | 823 | 2011/8/23 | 111017 |     |     | 8,074 | 0      |
| EQ.m164.111020 | Erqiao | S1 | Female | 823 | 2011/8/23 | 111020 | Yes |     | 7,949 | 0      |
| EQ.m165.111024 | Erqiao | S2 | Female | 823 | 2011/8/23 | 111024 |     |     | 8,605 | 0      |
| EQ.m166.111031 | Erqiao | S2 | Female | 823 | 2011/8/23 | 111031 |     |     | 8,755 | 0      |
| EQ.m168.111104 | Erqiao | S2 | Female | 823 | 2011/8/23 | 111104 | Yes |     | 8,427 | 0      |
| QF.129.090428  | Qifu   | S2 | Female | 709 | 2008/9/26 | 90428  |     | Yes | 7,799 | 25,084 |
| QF.131.090529  | Qifu   | S2 | Female | 709 | 2008/9/26 | 90529  | Yes |     | 8,587 | 0      |
| QF.132.090610  | Qifu   | S4 | Female | 709 | 2008/9/26 | 90610  |     | Yes | 8,574 | 9,870  |
| QF.133.090620  | Qifu   | S2 | Female | 709 | 2008/9/26 | 90620  |     | Yes | 8,776 | 10,415 |
| QF.134.090930  | Qifu   | S4 | Female | 709 | 2008/9/26 | 90930  |     |     | 7,819 | 0      |
| QF.135.091001  | Qifu   | S4 | Female | 709 | 2008/9/26 | 91001  | Yes |     | 8,877 | 0      |
| QF.138.091013  | Qifu   | S4 | Female | 709 | 2008/9/26 | 91013  |     |     | 8,412 | 0      |
| QF.140.091021  | Qifu   | S3 | Female | 709 | 2008/9/26 | 91021  |     |     | 7,935 | 0      |
| QF.141.091025  | Qifu   | S3 | Female | 709 | 2008/9/26 | 91025  |     |     | 6,778 | 0      |
| QF.m322.080927 | Qifu   | S1 | Female | 709 | 2008/9/26 | 80927  | Yes |     | 8,202 | 0      |
| QF.m323.080928 | Qifu   | S1 | Female | 709 | 2008/9/26 | 80928  |     |     | 9,117 | 0      |
| QF.m324.081005 | Qifu   | S1 | Female | 709 | 2008/9/26 | 81005  |     |     | 8,138 | 0      |
| QF.m325.081015 | Qifu   | S1 | Female | 709 | 2008/9/26 | 81015  |     |     | 8,944 | 0      |
| QF.m326.081022 | Qifu   | S1 | Female | 709 | 2008/9/26 | 81022  |     |     | 8,907 | 0      |

|                |      |    |        |     |           |       |     |     |       |        |
|----------------|------|----|--------|-----|-----------|-------|-----|-----|-------|--------|
| QF.m327.081029 | Qifu | S1 | Female | 709 | 2008/9/26 | 81029 |     |     | 8,800 | 0      |
| QF.m328.081106 | Qifu | S1 | Female | 709 | 2008/9/26 | 81106 |     | Yes | 8,624 | 19,137 |
| QF.m329.081113 | Qifu | S1 | Female | 709 | 2008/9/26 | 81113 |     |     | 8,803 | 0      |
| QF.m330.081207 | Qifu | S2 | Female | 709 | 2008/9/26 | 81207 | Yes | Yes | 8,632 | 33,341 |
| QF.m333.090121 | Qifu | S2 | Female | 709 | 2008/9/26 | 90121 | Yes |     | 7,656 | 0      |
| NN.144.090425  | Nini | S2 | Female | 725 | 2008/8/23 | 90425 | Yes |     | 7,576 | 0      |
| NN.145.090428  | Nini | S2 | Female | 725 | 2008/8/23 | 90428 |     |     | 7,401 | 0      |
| NN.146.090501  | Nini | S2 | Female | 725 | 2008/8/23 | 90501 |     |     | 7,684 | 0      |
| NN.148.090713  | Nini | S2 | Female | 725 | 2008/8/23 | 90713 |     |     | 7,695 | 0      |
| NN.149.091002  | Nini | S4 | Female | 725 | 2008/8/23 | 91002 | Yes |     | 7,177 | 0      |
| NN.154.091025  | Nini | S3 | Female | 725 | 2008/8/23 | 91025 |     |     | 7,646 | 0      |
| NN.156.091104  | Nini | S3 | Female | 725 | 2008/8/23 | 91104 |     |     | 8,051 | 0      |
| NN.m219.080824 | Nini | S1 | Female | 725 | 2008/8/23 | 80824 |     |     | 7,861 | 0      |
| NN.m221.080829 | Nini | S1 | Female | 725 | 2008/8/23 | 80829 | Yes |     | 9,058 | 0      |
| NN.m223.080904 | Nini | S1 | Female | 725 | 2008/8/23 | 80904 |     |     | 7,681 | 0      |
| NN.m224.080915 | Nini | S1 | Female | 725 | 2008/8/23 | 80915 |     |     | 7,511 | 0      |
| NN.m226.080925 | Nini | S1 | Female | 725 | 2008/8/23 | 80925 |     |     | 8,497 | 0      |
| NN.m227.080930 | Nini | S1 | Female | 725 | 2008/8/23 | 80930 |     |     | 8,632 | 0      |
| NN.m228.081004 | Nini | S1 | Female | 725 | 2008/8/23 | 81004 | Yes |     | 8,735 | 0      |
| NN.m230.081017 | Nini | S1 | Female | 725 | 2008/8/23 | 81017 |     |     | 8,708 | 0      |
| NN.m231.081023 | Nini | S1 | Female | 725 | 2008/8/23 | 81023 |     |     | 8,892 | 0      |
| NN.m232.081030 | Nini | S2 | Female | 725 | 2008/8/23 | 81030 |     |     | 8,670 | 0      |
| NN.m233.081102 | Nini | S2 | Female | 725 | 2008/8/23 | 81102 |     |     | 8,669 | 0      |
| NN.m234.081109 | Nini | S2 | Female | 725 | 2008/8/23 | 81109 |     |     | 8,327 | 0      |
| NN.m236.081124 | Nini | S2 | Female | 725 | 2008/8/23 | 81124 |     |     | 8,328 | 0      |
| NN.m237.081201 | Nini | S2 | Female | 725 | 2008/8/23 | 81201 |     |     | 8,454 | 0      |
| NN.m238.081204 | Nini | S2 | Female | 725 | 2008/8/23 | 81204 | Yes |     | 8,334 | 0      |
| NN.m239.081225 | Nini | S2 | Female | 725 | 2008/8/23 | 81225 |     |     | 8,330 | 0      |

|                |       |    |        |     |           |       |     |     |       |        |
|----------------|-------|----|--------|-----|-----------|-------|-----|-----|-------|--------|
| NN.m241.090111 | Nini  | S2 | Female | 725 | 2008/8/23 | 90111 |     |     | 7,316 | 0      |
| SY.159.090502  | Suyun | S2 | Male   | 718 | 2008/8/5  | 90502 |     | Yes | 7,980 | 19,993 |
| SY.163.090706  | Suyun | S2 | Male   | 718 | 2008/8/5  | 90706 |     | Yes | 7,152 | 10,598 |
| SY.165.091104  | Suyun | S3 | Male   | 718 | 2008/8/5  | 91104 |     |     | 8,030 | 0      |
| SY.166.091106  | Suyun | S3 | Male   | 718 | 2008/8/5  | 91106 |     |     | 7,357 | 0      |
| SY.167.091121  | Suyun | S3 | Male   | 718 | 2008/8/5  | 91121 | Yes |     | 8,268 | 0      |
| SY.168.091027  | Suyun | S3 | Male   | 718 | 2008/8/5  | 91027 |     |     | 8,037 | 0      |
| SY.170.091018  | Suyun | S3 | Male   | 718 | 2008/8/5  | 91018 |     |     | 8,199 | 0      |
| SY.171.091009  | Suyun | S3 | Male   | 718 | 2008/8/5  | 91009 |     |     | 8,237 | 0      |
| SY.m190.080809 | Suyun | S1 | Male   | 718 | 2008/8/5  | 80809 |     | Yes | 8,712 | 52,635 |
| SY.m193.080817 | Suyun | S1 | Male   | 718 | 2008/8/5  | 80817 |     | Yes | 7,560 | 19,390 |
| SY.m195.080824 | Suyun | S1 | Male   | 718 | 2008/8/5  | 80824 | Yes | Yes | 8,620 | 0      |
| SY.m197.080904 | Suyun | S1 | Male   | 718 | 2008/8/5  | 80904 |     |     | 8,771 | 0      |
| SY.m198.080910 | Suyun | S1 | Male   | 718 | 2008/8/5  | 80910 |     |     | 8,815 | 0      |
| SY.m199.080917 | Suyun | S1 | Male   | 718 | 2008/8/5  | 80917 |     |     | 9,022 | 0      |
| SY.m201.080929 | Suyun | S1 | Male   | 718 | 2008/8/5  | 80929 |     |     | 9,040 | 0      |
| SY.m202.081003 | Suyun | S1 | Male   | 718 | 2008/8/5  | 81003 | Yes |     | 8,985 | 0      |
| SY.m204.081018 | Suyun | S2 | Male   | 718 | 2008/8/5  | 81018 |     |     | 8,831 | 0      |
| SY.m205.081025 | Suyun | S2 | Male   | 718 | 2008/8/5  | 81025 |     |     | 8,938 | 0      |
| SY.m207.081103 | Suyun | S2 | Male   | 718 | 2008/8/5  | 81103 |     |     | 8,317 | 0      |
| SY.m209.081113 | Suyun | S2 | Male   | 718 | 2008/8/5  | 81113 |     |     | 8,644 | 0      |
| SY.m210.081125 | Suyun | S2 | Male   | 718 | 2008/8/5  | 81125 | Yes |     | 8,573 | 0      |
| SY.m211.081205 | Suyun | S2 | Male   | 718 | 2008/8/5  | 81205 |     |     | 8,740 | 0      |
| SY.m212.081215 | Suyun | S2 | Male   | 718 | 2008/8/5  | 81215 |     |     | 8,486 | 0      |
| SY.m213.081222 | Suyun | S2 | Male   | 718 | 2008/8/5  | 81222 |     |     | 8,518 | 0      |
| SY.m214.090102 | Suyun | S2 | Male   | 718 | 2008/8/5  | 90102 |     |     | 8,955 | 0      |
| SY.m215.090120 | Suyun | S2 | Male   | 718 | 2008/8/5  | 90120 |     |     | 8,769 | 0      |
| SY.m216.090120 | Suyun | S2 | Male   | 718 | 2008/8/5  | 90120 |     | Yes | 8,738 | 59,573 |
| SY.m217.090126 | Suyun | S2 | Male   | 718 | 2008/8/5  | 90126 |     |     | 8,855 | 0      |

|                |       |    |      |     |           |       |     |  |       |   |
|----------------|-------|----|------|-----|-----------|-------|-----|--|-------|---|
| SY.m218.081229 | Suyun | S2 | Male | 718 | 2008/8/5  | 81229 |     |  | 8,743 | 0 |
| YL.172.090417  | Yalin | S2 | Male | 726 | 2008/8/24 | 90417 |     |  | 7,434 | 0 |
| YL.173.090701  | Yalin | S3 | Male | 726 | 2008/8/24 | 90701 | Yes |  | 7,766 | 0 |
| YL.174.090710  | Yalin | S3 | Male | 726 | 2008/8/24 | 90710 |     |  | 7,567 | 0 |
| YL.175.090831  | Yalin | S3 | Male | 726 | 2008/8/24 | 90831 |     |  | 8,196 | 0 |
| YL.176.090903  | Yalin | S3 | Male | 726 | 2008/8/24 | 90903 |     |  | 8,225 | 0 |
| YL.177.091008  | Yalin | S3 | Male | 726 | 2008/8/24 | 91008 |     |  | 7,581 | 0 |
| YL.178.091015  | Yalin | S3 | Male | 726 | 2008/8/24 | 91015 | Yes |  | 7,856 | 0 |
| YL.180.091023  | Yalin | S3 | Male | 726 | 2008/8/24 | 91023 |     |  | 7,866 | 0 |
| YL.182.091101  | Yalin | S3 | Male | 726 | 2008/8/24 | 91101 |     |  | 8,159 | 0 |
| YL.183.091104  | Yalin | S3 | Male | 726 | 2008/8/24 | 91104 |     |  | 7,393 | 0 |
| YL.m247.080904 | Yalin | S1 | Male | 726 | 2008/8/24 | 80904 |     |  | 7,239 | 0 |
| YL.m248.080906 | Yalin | S1 | Male | 726 | 2008/8/24 | 80906 |     |  | 8,660 | 0 |
| YL.m249.080909 | Yalin | S1 | Male | 726 | 2008/8/24 | 80909 |     |  | 8,326 | 0 |
| YL.m250.080912 | Yalin | S1 | Male | 726 | 2008/8/24 | 80912 |     |  | 8,586 | 0 |
| YL.m251.080916 | Yalin | S1 | Male | 726 | 2008/8/24 | 80916 |     |  | 8,304 | 0 |
| YL.m252.080919 | Yalin | S1 | Male | 726 | 2008/8/24 | 80919 | Yes |  | 8,762 | 0 |
| YL.m253.080924 | Yalin | S1 | Male | 726 | 2008/8/24 | 80924 |     |  | 8,584 | 0 |
| YL.m255.081001 | Yalin | S1 | Male | 726 | 2008/8/24 | 81001 |     |  | 8,609 | 0 |
| YL.m256.081008 | Yalin | S1 | Male | 726 | 2008/8/24 | 81008 |     |  | 8,536 | 0 |
| YL.m257.081014 | Yalin | S1 | Male | 726 | 2008/8/24 | 81014 |     |  | 8,803 | 0 |
| YL.m258.081022 | Yalin | S1 | Male | 726 | 2008/8/24 | 81022 |     |  | 8,779 | 0 |
| YL.m260.081105 | Yalin | S1 | Male | 726 | 2008/8/24 | 81105 |     |  | 8,597 | 0 |
| YL.m261.081113 | Yalin | S2 | Male | 726 | 2008/8/24 | 81113 |     |  | 8,338 | 0 |
| YL.m262.081122 | Yalin | S2 | Male | 726 | 2008/8/24 | 81122 |     |  | 8,185 | 0 |
| YL.m263.081213 | Yalin | S2 | Male | 726 | 2008/8/24 | 81213 |     |  | 8,418 | 0 |
| YL.m264.081212 | Yalin | S2 | Male | 726 | 2008/8/24 | 81212 | Yes |  | 8,526 | 0 |
| YL.m265.090109 | Yalin | S2 | Male | 726 | 2008/8/24 | 90109 | Yes |  | 8,555 | 0 |



|                |        |    |        |     |          |        |     |     |       |        |
|----------------|--------|----|--------|-----|----------|--------|-----|-----|-------|--------|
| JJ.104.130515  | Junjun | S4 | Female | 813 | 2011/8/1 | 130515 |     | Yes | 7,626 | 18,428 |
| JJ.14.121127   | Junjun | S3 | Female | 813 | 2011/8/1 | 121127 |     |     | 8,464 | 0      |
| JJ.226.121029  | Junjun | S3 | Female | 813 | 2011/8/1 | 121029 |     | Yes | 8,698 | 53,051 |
| JJ.227.130101  | Junjun | S3 | Female | 813 | 2011/8/1 | 130101 |     | Yes | 8,061 | 50,139 |
| JJ.228.130108  | Junjun | S3 | Female | 813 | 2011/8/1 | 130108 |     |     | 8,113 | 0      |
| JJ.229.130113  | Junjun | S3 | Female | 813 | 2011/8/1 | 130113 |     |     | 8,817 | 0      |
| JJ.230.130116  | Junjun | S3 | Female | 813 | 2011/8/1 | 130116 |     | Yes | 7,889 | 56,783 |
| JJ.231.130129  | Junjun | S3 | Female | 813 | 2011/8/1 | 130129 |     | Yes | 8,853 | 60,248 |
| JJ.232.130204  | Junjun | S3 | Female | 813 | 2011/8/1 | 130204 |     |     | 8,787 | 0      |
| JJ.233.130206  | Junjun | S3 | Female | 813 | 2011/8/1 | 130206 |     |     | 8,117 | 0      |
| JJ.234.130208  | Junjun | S3 | Female | 813 | 2011/8/1 | 130208 | Yes | Yes | 8,553 | 54,660 |
| JJ.235.130214  | Junjun | S3 | Female | 813 | 2011/8/1 | 130214 |     |     | 8,778 | 0      |
| JJ.236.130217  | Junjun | S3 | Female | 813 | 2011/8/1 | 130217 |     |     | 8,562 | 0      |
| JJ.250.130315  | Junjun | S3 | Female | 813 | 2011/8/1 | 130315 |     | Yes | 8,653 | 18,442 |
| JJ.251.130321  | Junjun | S3 | Female | 813 | 2011/8/1 | 130321 |     | Yes | 8,784 | 34,745 |
| JJ.252.130328  | Junjun | S3 | Female | 813 | 2011/8/1 | 130328 |     |     | 8,821 | 0      |
| JJ.253.130417  | Junjun | S4 | Female | 813 | 2011/8/1 | 130417 |     | Yes | 8,663 | 9,173  |
| JJ.254.130423  | Junjun | S4 | Female | 813 | 2011/8/1 | 130423 |     |     | 8,348 | 0      |
| JJ.255.130501  | Junjun | S4 | Female | 813 | 2011/8/1 | 130501 |     |     | 8,518 | 0      |
| JJ.256.130510  | Junjun | S4 | Female | 813 | 2011/8/1 | 130510 |     |     | 8,494 | 0      |
| JJ.257.130514  | Junjun | S4 | Female | 813 | 2011/8/1 | 130514 | Yes |     | 8,214 | 0      |
| JJ.258.130524  | Junjun | S4 | Female | 813 | 2011/8/1 | 130524 |     |     | 8,215 | 0      |
| JJ.259.130605  | Junjun | S4 | Female | 813 | 2011/8/1 | 130605 |     | Yes | 7,534 | 52,180 |
| JJ.260.130618  | Junjun | S4 | Female | 813 | 2011/8/1 | 130618 |     |     | 7,518 | 0      |
| JJ.261.130624  | Junjun | S4 | Female | 813 | 2011/8/1 | 130624 |     | Yes | 8,068 | 20,639 |
| JJ.263.130710  | Junjun | S3 | Female | 813 | 2011/8/1 | 130710 |     |     | 8,049 | 0      |
| JJ.264.130918  | Junjun | S3 | Female | 813 | 2011/8/1 | 130918 |     |     | 7,936 | 0      |
| JJ.265.130922  | Junjun | S4 | Female | 813 | 2011/8/1 | 130922 |     | Yes | 8,082 | 0      |
| JJ.m100.110929 | Junjun | S1 | Female | 813 | 2011/8/1 | 110929 | Yes | Yes | 8,389 | 0      |

|                |          |    |        |     |           |        |     |     |       |        |
|----------------|----------|----|--------|-----|-----------|--------|-----|-----|-------|--------|
| JJ.m102.111008 | Junjun   | S2 | Female | 813 | 2011/8/1  | 111008 |     | Yes | 8,285 | 0      |
| JJ.m104.111025 | Junjun   | S2 | Female | 813 | 2011/8/1  | 111025 |     | Yes | 8,287 | 0      |
| JJ.m83.110808  | Junjun   | S1 | Female | 813 | 2011/8/1  | 110808 |     |     | 8,344 | 0      |
| JJ.m88.110820  | Junjun   | S1 | Female | 813 | 2011/8/1  | 110820 | Yes | Yes | 8,208 | 19,716 |
| JJ.m92.110901  | Junjun   | S1 | Female | 813 | 2011/8/1  | 110901 |     | Yes | 8,392 | 0      |
| JJ.m94.110908  | Junjun   | S1 | Female | 813 | 2011/8/1  | 110908 |     | Yes | 8,530 | 0      |
| JJ.m96.110915  | Junjun   | S1 | Female | 813 | 2011/8/1  | 110915 | Yes | Yes | 8,471 | 0      |
| ZZ.105.130403  | Zhenzhen | S3 | Female | 814 | 2011/8/4  | 130403 |     | Yes | 6,699 | 60,577 |
| ZZ.106.130918  | Zhenzhen | S4 | Female | 814 | 2011/8/4  | 130918 |     |     | 7,776 | 0      |
| ZZ.107.130327  | Zhenzhen | S3 | Female | 814 | 2011/8/4  | 130327 |     | Yes | 7,958 | 0      |
| ZZ.109.130808  | Zhenzhen | S3 | Female | 814 | 2011/8/4  | 130808 | Yes | Yes | 8,113 | 0      |
| ZZ.112.130109  | Zhenzhen | S3 | Female | 814 | 2011/8/4  | 130109 |     | Yes | 7,997 | 59,667 |
| ZZ.115.130410  | Zhenzhen | S4 | Female | 814 | 2011/8/4  | 130410 |     | Yes | 8,010 | 25,987 |
| ZZ.m173.110815 | Zhenzhen | S1 | Female | 814 | 2011/8/4  | 110815 | Yes | Yes | 8,858 | 0      |
| ZZ.m175.110820 | Zhenzhen | S1 | Female | 814 | 2011/8/4  | 110820 |     | Yes | 8,759 | 0      |
| ZZ.m177.110826 | Zhenzhen | S1 | Female | 814 | 2011/8/4  | 110826 |     | Yes | 8,825 | 16,642 |
| ZZ.m179.110902 | Zhenzhen | S1 | Female | 814 | 2011/8/4  | 110902 |     | Yes | 8,745 | 0      |
| ZZ.m181.110915 | Zhenzhen | S1 | Female | 814 | 2011/8/4  | 110915 |     | Yes | 8,701 | 0      |
| ZZ.m183.110928 | Zhenzhen | S1 | Female | 814 | 2011/8/4  | 110928 | Yes | Yes | 8,864 | 0      |
| ZZ.m187.111013 | Zhenzhen | S2 | Female | 814 | 2011/8/4  | 111013 |     |     | 8,703 | 0      |
| ZZ.m188.111015 | Zhenzhen | S2 | Female | 814 | 2011/8/4  | 111015 | Yes | Yes | 8,837 | 0      |
| HH.184.090203  | Huanhuan | S2 | Female | 723 | 2008/8/10 | 90203  |     |     | 7,616 | 0      |
| HH.185.090502  | Huanhuan | S2 | Female | 723 | 2008/8/10 | 90502  |     |     | 8,092 | 0      |
| HH.186.090510  | Huanhuan | S2 | Female | 723 | 2008/8/10 | 90510  | Yes |     | 7,765 | 0      |
| HH.187.090530  | Huanhuan | S2 | Female | 723 | 2008/8/10 | 90530  |     |     | 8,124 | 0      |
| HH.188.090613  | Huanhuan | S2 | Female | 723 | 2008/8/10 | 90613  |     |     | 6,960 | 0      |
| HH.190.090715  | Huanhuan | S2 | Female | 723 | 2008/8/10 | 90715  |     |     | 7,331 | 0      |
| HH.192.090930  | Huanhuan | S4 | Female | 723 | 2008/8/10 | 90930  | Yes |     | 8,547 | 0      |

|                |          |    |        |     |           |       |     |  |       |   |
|----------------|----------|----|--------|-----|-----------|-------|-----|--|-------|---|
| HH.193.091001  | Huanhuan | S4 | Female | 723 | 2008/8/10 | 91001 |     |  | 8,702 | 0 |
| HH.195.091007  | Huanhuan | S4 | Female | 723 | 2008/8/10 | 91007 |     |  | 8,594 | 0 |
| HH.196.091011  | Huanhuan | S4 | Female | 723 | 2008/8/10 | 91011 |     |  | 8,111 | 0 |
| HH.197.091013  | Huanhuan | S4 | Female | 723 | 2008/8/10 | 91013 |     |  | 8,296 | 0 |
| HH.202.091106  | Huanhuan | S3 | Female | 723 | 2008/8/10 | 91106 |     |  | 8,679 | 0 |
| HH.m272.080901 | Huanhuan | S1 | Female | 723 | 2008/8/10 | 80901 |     |  | 8,169 | 0 |
| HH.m273.080908 | Huanhuan | S1 | Female | 723 | 2008/8/10 | 80908 |     |  | 8,481 | 0 |
| HH.m274.080918 | Huanhuan | S1 | Female | 723 | 2008/8/10 | 80918 |     |  | 8,861 | 0 |
| HH.m275.080925 | Huanhuan | S1 | Female | 723 | 2008/8/10 | 80925 | Yes |  | 9,287 | 0 |
| HH.m276.081001 | Huanhuan | S1 | Female | 723 | 2008/8/10 | 81001 |     |  | 9,006 | 0 |
| HH.m277.081006 | Huanhuan | S1 | Female | 723 | 2008/8/10 | 81006 |     |  | 8,985 | 0 |
| HH.m278.081017 | Huanhuan | S2 | Female | 723 | 2008/8/10 | 81017 | Yes |  | 8,963 | 0 |
| HH.m280.081222 | Huanhuan | S2 | Female | 723 | 2008/8/10 | 81222 |     |  | 8,800 | 0 |
| HH.m281.081225 | Huanhuan | S2 | Female | 723 | 2008/8/10 | 81225 | Yes |  | 8,463 | 0 |
| HH.m313.081222 | Huanhuan | S2 | Female | 723 | 2008/8/10 | 81222 |     |  | 8,408 | 0 |
| YD.m314.080809 | Yuanda   | S1 | Male   | 627 | 2008/8/6  | 80809 |     |  | 8,531 | 0 |
| YD.m318.080827 | Yuanda   | S1 | Male   | 627 | 2008/8/6  | 80827 |     |  | 8,498 | 0 |
| YD.m319.080831 | Yuanda   | S1 | Male   | 627 | 2008/8/6  | 80831 |     |  | 8,704 | 0 |
| YD.m320.080907 | Yuanda   | S1 | Male   | 627 | 2008/8/6  | 80907 |     |  | 9,002 | 0 |
| YD.m321.080914 | Yuanda   | S1 | Male   | 627 | 2008/8/6  | 80914 |     |  | 8,866 | 0 |
| YX.m244.080811 | Yuanxiao | S1 | Male   | 628 | 2008/8/6  | 80811 |     |  | 7,086 | 0 |
| YX.m245.080813 | Yuanxiao | S1 | Male   | 628 | 2008/8/6  | 80813 |     |  | 8,273 | 0 |

**Supplemental Table S2:** the OOB classification error rates of the 51 OTUs (Figure 1D).

| Class | S1    | S2    | S3    | S4   | Class error (%) |
|-------|-------|-------|-------|------|-----------------|
| S1    | 92.12 | 1.3   | 6.37  | 0.21 | 7.88            |
| S2    | 59.17 | 19.27 | 20.22 | 1.33 | 80.73           |
| S3    | 15.57 | 6.49  | 73.59 | 4.35 | 26.41           |
| S4    | 4.19  | 2.52  | 84.83 | 8.46 | 91.54           |

Note: OOB estimate of error rate: 51.64%.

**Supplemental Table S3:** the statistics of sequence and assembly information.

| SampleID       | Different growth stages | RawData (Mb) | CleanData (Mb) | NonHostData (Mb) | Percentage(%) | Scaffigs number | Scaffigs length(bp) | N50 (bp) | N90 (bp) | Max (bp) | Min (bp) | Average len.(bp) |
|----------------|-------------------------|--------------|----------------|------------------|---------------|-----------------|---------------------|----------|----------|----------|----------|------------------|
| CD.m71.110914  | S1                      | 8,238        | 8,025          | 6,849            | 0.83          | 11,980          | 20,091,270          | 2,604    | 650      | 118,118  | 500      | 1,677            |
| CD.m77.111001  | S1                      | 5,327        | 5,161          | 2,875            | 0.54          | 8,719           | 11,630,855          | 1,629    | 615      | 60,251   | 500      | 1,334            |
| CX.m1.110827   | S1                      | 8,021        | 7,709          | 7,462            | 0.93          | 1,115           | 12,496,895          | 42,416   | 5,553    | 444,346  | 500      | 11,208           |
| CX.m18.110917  | S1                      | 5,594        | 5,457          | 3,962            | 0.71          | 3,863           | 11,534,228          | 11,955   | 873      | 362,695  | 500      | 2,986            |
| EQ.m114.110825 | S1                      | 5,435        | 5,278          | 4,792            | 0.88          | 5,497           | 8,416,600           | 2,047    | 630      | 88,255   | 500      | 1,531            |
| EQ.m164.111020 | S1                      | 5,470        | 5,331          | 4,644            | 0.85          | 8,551           | 17,076,260          | 3,677    | 709      | 109,140  | 500      | 1,997            |
| HH.m275.080925 | S1                      | 8,207        | 7,481          | 3,769            | 0.46          | 3,787           | 13,280,253          | 16,833   | 948      | 352,612  | 500      | 3,507            |
| HQ.m125.110820 | S1                      | 5,337        | 5,083          | 4,984            | 0.93          | 2,728           | 4,042,069           | 1,963    | 629      | 35,778   | 500      | 1,482            |
| HQ.m34.110906  | S1                      | 8,875        | 8,647          | 7,963            | 0.9           | 2,512           | 8,046,807           | 10,200   | 1,031    | 119,068  | 500      | 3,203            |
| JJ.m100.110929 | S1                      | 7,126        | 6,938          | 4,440            | 0.62          | 7,850           | 15,592,888          | 3,753    | 681      | 361,161  | 500      | 1,986            |
| JJ.m88.110820  | S1                      | 5,318        | 5,166          | 4,774            | 0.9           | 5,838           | 13,027,436          | 4,529    | 760      | 92,297   | 500      | 2,231            |
| JJ.m95.110911  | S1                      | 9,283        | 8,937          | 8,401            | 0.91          | 10,683          | 23,091,526          | 4,047    | 770      | 106,466  | 500      | 2,162            |
| NN.m221.080829 | S1                      | 5,502        | 5,037          | 2,814            | 0.51          | 9,029           | 16,973,370          | 3,062    | 715      | 58,498   | 500      | 1,880            |
| NN.m228.081002 | S1                      | 7,711        | 7,380          | 5,201            | 0.67          | 10,089          | 16,502,604          | 2,211    | 676      | 118,590  | 500      | 1,636            |
| QF.m322.080927 | S1                      | 5,377        | 5,223          | 5,142            | 0.96          | 3,061           | 10,565,891          | 7,272    | 1,278    | 89,278   | 500      | 3,452            |
| QQ.m135.110814 | S1                      | 5,233        | 5,075          | 5,026            | 0.96          | 2,120           | 11,316,574          | 16,696   | 1,970    | 182,235  | 500      | 5,338            |
| SY.m195.080827 | S1                      | 5,250        | 5,081          | 5,037            | 0.96          | 9,146           | 21,633,075          | 10,253   | 710      | 350,225  | 500      | 2,365            |
| SY.m202.081002 | S1                      | 5,178        | 4,909          | 1,734            | 0.33          | 7,452           | 21,754,413          | 10,993   | 843      | 157,532  | 500      | 2,919            |

|                |    |       |       |       |      |        |            |       |     |         |     |       |
|----------------|----|-------|-------|-------|------|--------|------------|-------|-----|---------|-----|-------|
| YL.m252.080918 | S1 | 5,815 | 5,607 | 5,516 | 0.95 | 6,314  | 17,616,432 | 7,500 | 926 | 168,315 | 500 | 2,790 |
| ZZ.m173.110828 | S1 | 5,289 | 5,111 | 5,034 | 0.95 | 6,734  | 18,539,887 | 9,719 | 872 | 464,334 | 500 | 2,753 |
| ZZ.m183.110929 | S1 | 8,364 | 8,042 | 4,526 | 0.54 | 9,520  | 11,667,812 | 1,394 | 582 | 107,597 | 500 | 1,226 |
| YL.m265.090109 | S2 | 6,133 | 5,415 | 5,159 | 0.84 | 15,405 | 34,589,820 | 4,023 | 802 | 336,922 | 500 | 2,245 |
| HH.m278.081017 | S2 | 6,448 | 6,137 | 2,854 | 0.44 | 8,577  | 25,501,463 | 8,511 | 937 | 168,735 | 500 | 2,973 |
| CD.m121.111017 | S2 | 7,466 | 7,252 | 5,942 | 0.8  | 11,811 | 16,879,825 | 1,809 | 644 | 107,932 | 500 | 1,429 |
| CX.m31.111104  | S2 | 8,238 | 7,646 | 5,584 | 0.68 | 7,215  | 15,117,784 | 4,331 | 720 | 286,459 | 500 | 2,095 |
| EQ.m168.111104 | S2 | 5,325 | 5,091 | 2,060 | 0.39 | 10,698 | 22,641,356 | 5,857 | 685 | 405,373 | 500 | 2,116 |
| HH.186.090510  | S2 | 5,127 | 4,921 | 4,888 | 0.95 | 18,838 | 31,308,385 | 2,303 | 683 | 127,204 | 500 | 1,662 |
| HH.m281.081225 | S2 | 8,079 | 6,628 | 3,150 | 0.39 | 16,414 | 27,415,793 | 2,637 | 644 | 99,768  | 500 | 1,670 |
| HQ.m55.111105  | S2 | 7,165 | 6,793 | 2,639 | 0.37 | 16,574 | 16,828,013 | 1,027 | 565 | 41,689  | 500 | 1,015 |
| NN.144.090425  | S2 | 7,978 | 7,723 | 7,702 | 0.97 | 19,535 | 37,270,516 | 3,200 | 699 | 163,330 | 500 | 1,908 |
| NN.m238.081204 | S2 | 6,017 | 5,737 | 3,084 | 0.51 | 10,357 | 27,805,781 | 8,606 | 788 | 447,565 | 500 | 2,685 |
| QF.131.090529  | S2 | 5,729 | 5,434 | 5,406 | 0.94 | 11,323 | 16,658,383 | 1,918 | 638 | 34,000  | 500 | 1,471 |
| QF.m330.081218 | S2 | 7,785 | 7,544 | 4,284 | 0.55 | 14,026 | 37,804,432 | 9,057 | 807 | 376,305 | 500 | 2,695 |
| QF.m333.090121 | S2 | 5,285 | 4,964 | 4,152 | 0.79 | 19,516 | 43,231,063 | 4,876 | 743 | 260,603 | 500 | 2,215 |
| QQ.m152.111015 | S2 | 8,107 | 7,776 | 6,740 | 0.83 | 7,456  | 12,000,636 | 2,318 | 655 | 72,810  | 500 | 1,610 |
| SY.m210.081125 | S2 | 5,271 | 5,006 | 1,462 | 0.28 | 9,345  | 18,174,450 | 3,933 | 679 | 224,117 | 500 | 1,945 |
| YL.m264.081212 | S2 | 5,245 | 5,113 | 4,548 | 0.87 | 10,858 | 24,206,897 | 4,964 | 731 | 118,631 | 500 | 2,229 |
| ZZ.m188.111015 | S2 | 5,286 | 5,085 | 4,269 | 0.81 | 7,100  | 9,308,276  | 1,570 | 609 | 60,234  | 500 | 1,311 |
| CD.70.130117   | S3 | 8,228 | 7,405 | 7,350 | 0.89 | 10,749 | 13,298,705 | 1,433 | 592 | 31,247  | 500 | 1,237 |

|               |    |        |       |       |      |        |             |       |     |         |     |       |
|---------------|----|--------|-------|-------|------|--------|-------------|-------|-----|---------|-----|-------|
| CX.39.130208  | S3 | 5,409  | 5,238 | 5,193 | 0.96 | 4,651  | 5,031,505   | 1,173 | 567 | 46,880  | 500 | 1,082 |
| CX.6.121213   | S3 | 8,305  | 8,084 | 7,701 | 0.93 | 17,203 | 38,703,543  | 5,472 | 713 | 224,108 | 500 | 2,250 |
| EQ.118.130124 | S3 | 8,387  | 8,090 | 8,054 | 0.96 | 10,685 | 19,902,231  | 3,099 | 685 | 225,695 | 500 | 1,863 |
| HQ.47.130816  | S3 | 10,080 | 9,831 | 9,707 | 0.96 | 89,866 | 111,531,867 | 1,408 | 596 | 57,354  | 500 | 1,241 |
| HQ.59.130113  | S3 | 5,429  | 5,146 | 5,126 | 0.94 | 8,581  | 10,185,427  | 1,352 | 598 | 28,249  | 500 | 1,187 |
| JJ.234.130208 | S3 | 5,454  | 5,166 | 5,137 | 0.94 | 9,723  | 13,496,943  | 1,742 | 622 | 44,646  | 500 | 1,388 |
| SY.167.091121 | S3 | 7,997  | 7,479 | 7,456 | 0.93 | 14,486 | 39,389,888  | 7,601 | 826 | 247,727 | 500 | 2,719 |
| YL.173.090701 | S3 | 5,717  | 5,537 | 5,465 | 0.96 | 22,247 | 50,961,106  | 4,607 | 797 | 285,447 | 500 | 2,291 |
| YL.178.091015 | S3 | 7,840  | 7,639 | 7,370 | 0.94 | 28,460 | 49,192,912  | 2,596 | 683 | 65,014  | 500 | 1,728 |
| ZZ.109.130808 | S3 | 5,729  | 5,501 | 5,473 | 0.96 | 7,918  | 8,097,084   | 1,061 | 562 | 18,710  | 500 | 1,023 |
| CD.73.130415  | S4 | 5,517  | 5,258 | 5,232 | 0.95 | 19,634 | 28,185,900  | 1,826 | 656 | 46,149  | 500 | 1,436 |
| EQ.128.130507 | S4 | 5,735  | 5,536 | 5,461 | 0.95 | 28,508 | 36,433,156  | 1,493 | 607 | 101,676 | 500 | 1,278 |
| HH.192.090930 | S4 | 5,363  | 5,059 | 4,864 | 0.91 | 27,008 | 36,590,744  | 1,643 | 626 | 82,842  | 500 | 1,355 |
| JJ.257.130514 | S4 | 5,800  | 5,671 | 5,645 | 0.97 | 25,772 | 32,832,019  | 1,502 | 614 | 29,932  | 500 | 1,274 |
| NN.149.091002 | S4 | 8,075  | 7,771 | 7,701 | 0.95 | 10,089 | 14,297,087  | 1,879 | 628 | 24,766  | 500 | 1,417 |
| QF.135.091001 | S4 | 7,672  | 7,486 | 7,365 | 0.96 | 27,540 | 43,347,118  | 2,117 | 672 | 133,505 | 500 | 1,574 |
| QQ.102.130620 | S4 | 5,542  | 5,275 | 5,261 | 0.95 | 56,796 | 74,542,470  | 1,598 | 620 | 42,303  | 500 | 1,312 |
| QQ.98.130411  | S4 | 5,303  | 5,034 | 5,010 | 0.94 | 20,406 | 29,134,722  | 1,805 | 631 | 57,842  | 500 | 1,428 |

**Supplemental Table S4: Pan-metagenome assembly index of giant panda gut microbiome.**

| #Level                | ContigNum | Total Length(bp) | N50_Length(bp) | N90_Length(bp) | Max_Length(bp) | Min_Length(bp) | GC%   |
|-----------------------|-----------|------------------|----------------|----------------|----------------|----------------|-------|
| ContigLen>= 300bp     | 461,872   | 551,924,865      | 2,679          | 403            | 464,334        | 300            | 47.57 |
| ContigLen>= 500bp     | 222,746   | 460,864,873      | 4,579          | 694            | 464,334        | 500            | 47.54 |
| ContigLen>= 1,000bp   | 89,948    | 370,293,669      | 8,046          | 1,425          | 464,334        | 1,000          | 47.32 |
| ContigLen>= 10,000bp  | 5,909     | 168,292,670      | 36,151         | 12,610         | 464,334        | 10,000         | 47.84 |
| ContigLen>= 100,000bp | 224       | 37,592,733       | 173,600        | 113,285        | 464,334        | 100,171        | 50.69 |



**Supplemental Table S5: The assembly and taxonomy information of MLG.**

| #ML Gname | ContigNum | TotalSize | MaxLen | AlignLen | Coverage | RefID                       | RefSize | RefAlignLen | RefCoverage | RefTaxID | RefTaxonomy                                                                                                                                                   |
|-----------|-----------|-----------|--------|----------|----------|-----------------------------|---------|-------------|-------------|----------|---------------------------------------------------------------------------------------------------------------------------------------------------------------|
| MLG1      | 1389      | 943816    | 166021 | 3852785  | 40.82    | gi 647802220 gb C P008696.1 | 7122173 | 2422461     | 34.01       | 325      | k__Bacteria;p__Proteobacteria;c__Gammaproteobacteria;o__Pseudomonadales;f__Pseudomonadaceae;g__Pseudomonas;s__Pseudomonas chlororaphis                        |
| MLG2      | 2359      | 7707564   | 38498  | 4156157  | 53.92    | gi 662712225 gb C P008823.1 | 4852980 | 2458544     | 50.66       | 4        | k__Bacteria;p__Proteobacteria;c__Gammaproteobacteria;o__Enterobacteriales;f__Enterobacteriaceae;g__Enterobacter;s__Enterobacter cloacae                       |
| MLG3      | 161       | 4995154   | 395672 | 4769492  | 95.48    | gi 150953431 gb C P000647.1 | 5315120 | 4510735     | 84.87       | 7        | k__Bacteria;p__Proteobacteria;c__Gammaproteobacteria;o__Enterobacteriales;f__Enterobacteriaceae;g__Klebsiella;s__Klebsiella pneumoniae                        |
| MLG4      | 757       | 4965613   | 164164 | 2783016  | 56.05    | gi 378937014 gb C P003351.1 | 2955294 | 2137445     | 72.33       | 165      | k__Bacteria;p__Firmicutes;c__Bacilli;o__Lactobacillales;f__Enterococcaceae;g__Enterococcus;s__Enterococcus faecium                                            |
| MLG5      | 105       | 4914501   | 257487 | 4326869  | 88.04    | gi 394343076 gb C P003683.1 | 6097032 | 4310576     | 70.7        | 12       | k__Bacteria;p__Proteobacteria;c__Gammaproteobacteria;o__Enterobacteriales;f__Enterobacteriaceae;g__Klebsiella;s__Klebsiella oxytoca                           |
| MLG6      | 165       | 4910119   | 309921 | 4413079  | 89.88    | gi 334732565 gb C P002824.1 | 5280350 | 4089534     | 77.45       | 15       | k__Bacteria;p__Proteobacteria;c__Gammaproteobacteria;o__Enterobacteriales;f__Enterobacteriaceae;g__Enterobacter;s__Enterobacter aerogenes                     |
| MLG7      | 5889      | 4294619   | 4191   | 0        | 0        | 0                           | -       | 0           | 0           | 0        | Unknow                                                                                                                                                        |
| MLG8      | 990       | 4226704   | 61888  | 2991179  | 70.77    | gi 480474683 gb C P004142.1 | 5398151 | 2567363     | 47.56       | 14       | k__Bacteria;p__Proteobacteria;c__Gammaproteobacteria;o__Enterobacteriales;f__Enterobacteriaceae;g__Raoultella;s__Raoultella omithinolytica                    |
| MLG9      | 174       | 4215722   | 316083 | 2526899  | 59.94    | gi 440045023 gb C P003938.1 | 4762179 | 2395751     | 50.31       | 3        | k__Bacteria;p__Proteobacteria;c__Gammaproteobacteria;o__Enterobacteriales;f__Enterobacteriaceae;g__Unclassified;s__Enterobacteriaceae bacterium strain FGI 57 |
| MLG10     | 875       | 3711220   | 49059  | 1502041  | 40.47    | gi 527122546 gb C P003025.1 | 1975541 | 1301701     | 65.89       | 207      | k__Bacteria;p__Firmicutes;c__Bacilli;o__Lactobacillales;f__Streptococcaceae;g__Streptococcus;s__Streptococcus lutetiensis                                     |
| MLG11     | 370       | 3662098   | 158535 | 1857300  | 50.72    | gi 291516109 emb FP929034.1 | 2384987 | 1562084     | 65.5        | 890      | k__Bacteria;p__Actinobacteria;c__Actinobacteria;o__Bifidobacteriales;f__Bifidobacteriaceae;g__Bifidobacterium;s__Bifidobacterium longum                       |
| MLG12     | 1180      | 3543762   | 29932  | 366318   | 10.34    | gi 326539903 gb C P002582.1 | 4714237 | 364459      | 7.73        | 51       | k__Bacteria;p__Firmicutes;c__Clostridia;o__Clostridiales;f__Lachnospiraceae;g__Cellulosilyticum;s__Cellulosilyticum lentocellum                               |
| MLG13     | 77        | 3341033   | 464334 | 2568988  | 76.89    | gi 327533853 gb C P002621.1 | 2739625 | 2540901     | 92.75       | 72       | k__Bacteria;p__Firmicutes;c__Bacilli;o__Lactobacillales;f__Enterococcaceae;g__Enterococcus;s__Enterococcus faecalis                                           |
| MLG14     | 69        | 3302369   | 247727 | 546532   | 16.55    | gi 160361034 gb C P000884.1 | 6767514 | 558234      | 8.25        | 1012     | k__Bacteria;p__Proteobacteria;c__Betaproteobacteria;o__Burkholderiales;f__Comamonadaceae;g__Delftia;s__Delftia acidovorans                                    |
| MLG15     | 54        | 3265280   | 260603 | 3077809  | 94.26    | gi 410821238 gb C P003493.1 | 3656170 | 3091264     | 84.55       | 929      | k__Bacteria;p__Actinobacteria;c__Actinobacteria;o__Actinomycetales;f__Propionibacteriaceae;g__Propionibacterium;s__Propionibacterium acidipropionici          |
| MLG16     | 143       | 2667936   | 85047  | 2629138  | 98.55    | gi 308044682 gb C P002222.1 | 3254376 | 2510258     | 77.13       | 385      | k__Bacteria;p__Firmicutes;c__Bacilli;o__Lactobacillales;f__Lactobacillaceae;g__Lactobacillus;s__Lactobacillus plantarum                                       |
| MLG17     | 477       | 2634625   | 34725  | 129293   | 4.91     | gi 378937014 gb C P003351.1 | 2955294 | 139273      | 4.71        | 165      | k__Bacteria;p__Firmicutes;c__Bacilli;o__Lactobacillales;f__Enterococcaceae;g__Enterococcus;s__Enterococcus faecium                                            |
| MLG18     | 261       | 2593772   | 84012  | 2181618  | 84.11    | gi 478439721 gb C P004856.1 | 3427276 | 2191613     | 63.95       | 363      | k__Bacteria;p__Firmicutes;c__Bacilli;o__Lactobacillales;f__Enterococcaceae;g__Enterococcus;s__Enterococcus casseliflavus                                      |
| MLG19     | 75        | 2541211   | 123797 | 82362    | 3.24     | gi 116608677 gb C P000454.1 | 4698945 | 84038       | 1.79        | 949      | k__Bacteria;p__Actinobacteria;c__Actinobacteria;o__Actinomycetales;f__Micrococcaceae;g__Arthrobacter;s__Arthrobacter sp. FB24                                 |
| MLG20     | 526       | 2495233   | 38991  | 2453919  | 98.34    | gi 392334715 gb C P003504.1 | 2827741 | 2339950     | 82.75       | 108      | k__Bacteria;p__Firmicutes;c__Bacilli;o__Lactobacillales;f__Enterococcaceae;g__Enterococcus;s__Enterococcus hirae                                              |
| MLG21     | 236       | 2486742   | 106241 | 2106421  | 84.71    | gi 334281572 dbj AP012054.1 | 2100077 | 1666627     | 79.36       | 368      | k__Bacteria;p__Firmicutes;c__Bacilli;o__Lactobacillales;f__Streptococcaceae;g__Streptococcus;s__Streptococcus pasteurianus                                    |
| MLG22     | 164       | 2483450   | 85036  | 2011321  | 80.99    | gi 323463200 gb C P002478.1 | 2572216 | 2020067     | 78.53       | 154      | k__Bacteria;p__Firmicutes;c__Bacilli;o__Bacillales;f__Staphylococcaceae;g__Staphylococcus;s__Staphylococcus pseudintermedius                                  |
| MLG23     | 167       | 2476783   | 405373 | 1852417  | 74.79    | gi 41584196 gb AE 017198.1  | 1992676 | 1611278     | 80.86       | 193      | k__Bacteria;p__Firmicutes;c__Bacilli;o__Lactobacillales;f__Lactobacillaceae;g__Lactobacillus;s__Lactobacillus johnsonii                                       |
| MLG24     | 297       | 2474294   | 36116  | 2462420  | 99.52    | gi 455418716 gb C P004345.1 | 3799539 | 2465410     | 64.89       | 301      | k__Bacteria;p__Proteobacteria;c__Gammaproteobacteria;o__Enterobacteriales;f__Enterobacteriaceae;g__Morganelia;s__Morganelia morgani                           |

|        |      |             |            |             |       |                                 |             |             |       |      |                                                                                                                                              |
|--------|------|-------------|------------|-------------|-------|---------------------------------|-------------|-------------|-------|------|----------------------------------------------------------------------------------------------------------------------------------------------|
| MLG 25 | 78   | 24599<br>81 | 32645<br>1 | 19960<br>81 | 81.14 | gii619734722 gb C<br>P007557.1  | 50990<br>34 | 20194<br>70 | 39.6  | 267  | k__Bacteria;p__Proteobacteria;c__Gammaproteobacteria;o__Enterobacteriales;f__Enterobacteriaceae;g__Citrobacter;s__Citrobacter freundii       |
| MLG 26 | 139  | 23646<br>50 | 65419      | 0           | 0     | 0                               | -           | 0           | 0     | 0    | Unknow                                                                                                                                       |
| MLG 27 | 22   | 23212<br>19 | 37630<br>5 | 20228<br>72 | 87.15 | gii585129876 gb C<br>P006713.1  | 23590<br>09 | 20000<br>65 | 84.78 | 895  | k__Bacteria;p__Actinobacteria;c__Actinobacteria;o__Bifidobacteriales;f__Bifidobacteriaceae;g__Bifidobacterium;s__Bifidobacterium breve       |
| MLG 28 | 103  | 22844<br>01 | 32768<br>2 | 17947<br>84 | 78.57 | gii300213939 gb C<br>P002034.1  | 18281<br>69 | 15515<br>77 | 84.87 | 192  | k__Bacteria;p__Firmicutes;c__Bacilli;o__Lactobacillales;f__Lactobacillaceae;g__Lactobacillus;s__Lactobacillus salivarius                     |
| MLG 29 | 41   | 22641<br>25 | 32950<br>7 | 31845       | 1.41  | gii183225820 dbj <br>AP008937.1 | 20986<br>85 | 31847       | 1.52  | 414  | k__Bacteria;p__Firmicutes;c__Bacilli;o__Lactobacillales;f__Lactobacillaceae;g__Lactobacillus;s__Lactobacillus fermentum                      |
| MLG 30 | 41   | 22341<br>42 | 35695<br>2 | 0           | 0     | 0                               | -           | 0           | 0     | 0    | Unknow                                                                                                                                       |
| MLG 31 | 675  | 22299<br>13 | 24181      | 33804<br>8  | 15.16 | gii406718232 emb <br>FR745875.1 | 37815<br>09 | 31013<br>5  | 8.2   | 20   | k__Bacteria;p__Firmicutes;c__Clostridia;o__Clostridiales;f__Clostridiaceae;g__Clostridium;s__Clostridium botulinum                           |
| MLG 32 | 642  | 22183<br>98 | 34647      | 17452<br>9  | 7.87  | gii188497817 gb C<br>P001078.1  | 36596<br>44 | 17453<br>5  | 4.77  | 20   | k__Bacteria;p__Firmicutes;c__Clostridia;o__Clostridiales;f__Clostridiaceae;g__Clostridium;s__Clostridium botulinum                           |
| MLG 33 | 74   | 21904<br>32 | 14437<br>9 | 46349<br>3  | 21.16 | gii313004821 emb <br>FN995097.1 | 22206<br>06 | 47123<br>9  | 21.22 | 1167 | k__Bacteria;p__Proteobacteria;c__Betaproteobacteria;o__Neisseriales;f__Neisseriaceae;g__Neisseria;s__Neisseria lactamica                     |
| MLG 34 | 24   | 21770<br>05 | 33615<br>8 | 11349<br>98 | 52.14 | gii341821300 emb <br>HE576794.1 | 24747<br>18 | 11460<br>98 | 46.31 | 651  | k__Bacteria;p__Firmicutes;c__Negativicutes;o__Selenomonadales;f__Veillonellaceae;g__Megasphaera;s__Megasphaera elsdenii                      |
| MLG 35 | 60   | 21763<br>88 | 13313<br>9 | 60051<br>4  | 27.59 | gii325177128 emb <br>FR824043.1 | 23564<br>44 | 58975<br>9  | 25.03 | 373  | k__Bacteria;p__Firmicutes;c__Bacilli;o__Lactobacillales;f__Streptococcaceae;g__Streptococcus;s__Streptococcus gallolyticus                   |
| MLG 36 | 74   | 20808<br>48 | 13849<br>6 | 0           | 0     | 0                               | -           | 0           | 0     | 0    | Unknow                                                                                                                                       |
| MLG 37 | 264  | 20744<br>92 | 10343<br>4 | 18812<br>93 | 90.69 | gii281374316 gb C<br>P001834.1  | 25981<br>44 | 17864<br>20 | 68.76 | 88   | k__Bacteria;p__Firmicutes;c__Bacilli;o__Lactobacillales;f__Streptococcaceae;g__Lactococcus;s__Lactococcus lactis                             |
| MLG 38 | 227  | 20721<br>84 | 20639<br>9 | 66629<br>8  | 32.15 | gii320459527 dbj <br>AP010890.1 | 24003<br>12 | 61442<br>3  | 25.6  | 890  | k__Bacteria;p__Actinobacteria;c__Actinobacteria;o__Bifidobacteriales;f__Bifidobacteriaceae;g__Bifidobacterium;s__Bifidobacterium longum      |
| MLG 39 | 1311 | 19486<br>64 | 17520      | 19428<br>8  | 9.97  | gii187720473 gb C<br>P001056.1  | 38003<br>27 | 19710<br>9  | 5.19  | 20   | k__Bacteria;p__Firmicutes;c__Clostridia;o__Clostridiales;f__Clostridiaceae;g__Clostridium;s__Clostridium botulinum                           |
| MLG 40 | 23   | 19370<br>14 | 18019<br>8 | 14484<br>09 | 74.78 | gii408465077 gb C<br>P003325.1  | 21673<br>04 | 14795<br>36 | 68.27 | 889  | k__Bacteria;p__Actinobacteria;c__Actinobacteria;o__Bifidobacteriales;f__Bifidobacteriaceae;g__Bifidobacterium;s__Bifidobacterium asteroides  |
| MLG 41 | 95   | 18788<br>11 | 93943      | 46331<br>4  | 24.66 | gii325177128 emb <br>FR824043.1 | 23564<br>44 | 43130<br>0  | 18.3  | 373  | k__Bacteria;p__Firmicutes;c__Bacilli;o__Lactobacillales;f__Streptococcaceae;g__Streptococcus;s__Streptococcus gallolyticus                   |
| MLG 42 | 159  | 18606<br>68 | 17309<br>7 | 13849<br>96 | 74.44 | gii523830301 gb C<br>P006006.1  | 17023<br>98 | 13230<br>10 | 77.71 | 98   | k__Bacteria;p__Proteobacteria;c__Epsilonproteobacteria;o__Campylobacteriales;f__Campylobacteriaceae;g__Campylobacter;s__Campylobacter jejuni |
| MLG 43 | 34   | 18246<br>63 | 26134<br>4 | 16424<br>42 | 90.01 | gii169803215 gb D<br>Q489736.1  | 17962<br>84 | 15842<br>29 | 88.19 | 818  | k__Bacteria;p__Firmicutes;c__Bacilli;o__Lactobacillales;f__Leuconostocaceae;g__Leuconostoc;s__Leuconostoc citreum                            |
| MLG 44 | 294  | 17834<br>00 | 32625      | 10393<br>6  | 5.83  | gii333741867 gb C<br>P002735.1  | 66858<br>42 | 10398<br>2  | 1.56  | 1019 | k__Bacteria;p__Proteobacteria;c__Betaproteobacteria;o__Burkholderiales;f__Comamonadaceae;g__Delftia;s__Delftia sp. Cs1-4                     |
| MLG 45 | 220  | 17821<br>03 | 54725      | 15302<br>10 | 85.87 | gii612150118 gb C<br>P007546.1  | 45619<br>05 | 15409<br>77 | 33.78 | 9    | k__Bacteria;p__Proteobacteria;c__Gammaproteobacteria;o__Enterobacteriales;f__Enterobacteriaceae;g__Enterobacter;s__Enterobacter asburiae     |
| MLG 46 | 666  | 17776<br>92 | 13032      | 34322<br>7  | 19.31 | gii47118322 dbj B<br>A000016.3  | 30314<br>30 | 33506<br>1  | 11.05 | 21   | k__Bacteria;p__Firmicutes;c__Clostridia;o__Clostridiales;f__Clostridiaceae;g__Clostridium;s__Clostridium perfringens                         |
| MLG 47 | 501  | 17339<br>73 | 41676      | 41440<br>4  | 23.9  | gii323272819 dbj <br>AP012052.1 | 39820<br>34 | 41641<br>1  | 10.46 | 956  | k__Bacteria;p__Actinobacteria;c__Actinobacteria;o__Actinomycetales;f__Microbacteriaceae;g__Microbacterium;s__Microbacterium testaceum        |
| MLG 48 | 200  | 17326<br>15 | 94762      | 15060<br>83 | 86.93 | gii343179174 dbj <br>AP009332.1 | 19501<br>35 | 14459<br>57 | 74.15 | 365  | k__Bacteria;p__Firmicutes;c__Bacilli;o__Lactobacillales;f__Streptococcaceae;g__Lactococcus;s__Lactococcus garvieae                           |
| MLG 49 | 180  | 17249<br>37 | 12997<br>7 | 15862<br>36 | 91.96 | gii349736152 gb C<br>P003034.1  | 53135<br>31 | 14021<br>65 | 26.39 | 1    | k__Bacteria;p__Proteobacteria;c__Gammaproteobacteria;o__Enterobacteriales;f__Enterobacteriaceae;g__Escherichia;s__Escherichia coli           |
| MLG 50 | 331  | 17214<br>85 | 45335      | 11628<br>9  | 6.76  | gii690347849 gb C<br>P007646.1  | 18362<br>97 | 11706<br>1  | 6.37  | 192  | k__Bacteria;p__Firmicutes;c__Bacilli;o__Lactobacillales;f__Lactobacillaceae;g__Lactobacillus;s__Lactobacillus salivarius                     |
| MLG 51 | 256  | 16769<br>20 | 72810      | 16641<br>15 | 99.24 | gii124491690 emb <br>AM406671.1 | 25294<br>78 | 16665<br>26 | 65.88 | 88   | k__Bacteria;p__Firmicutes;c__Bacilli;o__Lactobacillales;f__Streptococcaceae;g__Lactococcus;s__Lactococcus lactis                             |

|        |     |             |            |             |       |                                 |             |             |       |     |                                                                                                                                                               |
|--------|-----|-------------|------------|-------------|-------|---------------------------------|-------------|-------------|-------|-----|---------------------------------------------------------------------------------------------------------------------------------------------------------------|
| MLG 52 | 81  | 16586<br>52 | 18807<br>7 | 12309<br>22 | 74.21 | gii526120653 gb C<br>P006603.1  | 21454<br>45 | 11852<br>23 | 55.24 | 367 | k__Bacteria;p__Firmicutes;c__Bacilli;o__Lactobacillales;f__Lactobacillaceae;g__Lactobacillus;s__Lactobacillus reuteri                                         |
| MLG 53 | 76  | 16567<br>41 | 13482<br>7 | 66927       | 4.04  | gii353737348 gb C<br>P002644.1  | 21830<br>59 | 68848       | 3.15  | 34  | k__Bacteria;p__Firmicutes;c__Bacilli;o__Lactobacillales;f__Streptococcaceae;g__Streptococcus;s__Streptococcus suis                                            |
| MLG 54 | 244 | 16441<br>77 | 63272      | 13316<br>31 | 80.99 | gii158967071 gb C<br>P000033.3  | 19935<br>60 | 13390<br>44 | 67.17 | 212 | k__Bacteria;p__Firmicutes;c__Bacilli;o__Lactobacillales;f__Lactobacillaceae;g__Lactobacillus;s__Lactobacillus acidophilus                                     |
| MLG 55 | 196 | 16207<br>17 | 54659      | 14059<br>17 | 86.75 | gii301154649 emb <br>FQ312002.1 | 20868<br>75 | 14097<br>31 | 67.55 | 419 | k__Bacteria;p__Proteobacteria;c__Gammaproteobacteria;o__Pasteurellales;f__Pasteurellaceae;g__Haemophilus;s__Haemophilus parainfluenzae                        |
| MLG 56 | 137 | 16182<br>95 | 62106      | 10227<br>54 | 63.2  | gii288730948 emb <br>FN597254.1 | 23509<br>11 | 96407<br>7  | 41.01 | 373 | k__Bacteria;p__Firmicutes;c__Bacilli;o__Lactobacillales;f__Streptococcaceae;g__Streptococcus;s__Streptococcus gallolyticus                                    |
| MLG 57 | 172 | 16117<br>26 | 40558      | 34267<br>0  | 21.26 | gii523439782 gb C<br>P006252.1  | 52386<br>12 | 33699<br>1  | 6.43  | 274 | k__Bacteria;p__Proteobacteria;c__Gammaproteobacteria;o__Enterobacteriales;f__Enterobacteriaceae;g__Serratia;s__Serratia liquefaciens                          |
| MLG 58 | 620 | 15386<br>17 | 31884      | 45232       | 2.94  | gii549807177 gb C<br>P006721.1  | 51078<br>14 | 56892       | 1.11  | 24  | k__Bacteria;p__Firmicutes;c__Clostridia;o__Clostridiales;f__Clostridiaceae;g__Clostridium;s__Clostridium saccharobutylicum                                    |
| MLG 59 | 37  | 15143<br>18 | 15634<br>8 | 47651<br>1  | 31.47 | gii169803215 gb D<br>Q489736.1  | 17962<br>84 | 47878<br>8  | 26.65 | 818 | k__Bacteria;p__Firmicutes;c__Bacilli;o__Lactobacillales;f__Leuconostocaceae;g__Leuconostoc;s__Leuconostoc citreum                                             |
| MLG 60 | 56  | 14700<br>60 | 13571<br>2 | 62003<br>3  | 42.18 | gii612156087 gb C<br>P004887.1  | 59144<br>07 | 63383<br>2  | 10.72 | 12  | k__Bacteria;p__Proteobacteria;c__Gammaproteobacteria;o__Enterobacteriales;f__Enterobacteriaceae;g__Klebsiella;s__Klebsiella oxytoea                           |
| MLG 61 | 47  | 13312<br>43 | 20925<br>8 | 23093       | 1.73  | gii269093698 gb C<br>P001820.1  | 21321<br>42 | 23635       | 1.11  | 91  | k__Bacteria;p__Firmicutes;c__Negativicutes;o__Selenomonadales;f__Veillonellaceae;g__Veillonella;s__Veillonella parvula                                        |
| MLG 62 | 308 | 13190<br>85 | 51865      | 0           | 0     | 0                               | -           | 0           | 0     | 0   | Unknow                                                                                                                                                        |
| MLG 63 | 44  | 12752<br>84 | 15468<br>6 | 11119<br>12 | 87.19 | gii526120653 gb C<br>P006603.1  | 21454<br>45 | 11005<br>18 | 51.3  | 367 | k__Bacteria;p__Firmicutes;c__Bacilli;o__Lactobacillales;f__Lactobacillaceae;g__Lactobacillus;s__Lactobacillus reuteri                                         |
| MLG 64 | 161 | 12220<br>23 | 54815      | 0           | 0     | 0                               | -           | 0           | 0     | 0   | Unknow                                                                                                                                                        |
| MLG 65 | 70  | 11991<br>91 | 11939<br>5 | 75705<br>5  | 63.13 | gii78609255 emb C<br>R936503.1  | 18846<br>61 | 66306<br>2  | 35.18 | 364 | k__Bacteria;p__Firmicutes;c__Bacilli;o__Lactobacillales;f__Lactobacillaceae;g__Lactobacillus;s__Lactobacillus sakei                                           |
| MLG 66 | 450 | 11573<br>63 | 16441      | 0           | 0     | 0                               | -           | 0           | 0     | 0   | Unknow                                                                                                                                                        |
| MLG 67 | 75  | 11482<br>90 | 63927      | 89377<br>2  | 77.84 | gii619734722 gb C<br>P007557.1  | 50990<br>34 | 91679<br>1  | 17.98 | 267 | k__Bacteria;p__Proteobacteria;c__Gammaproteobacteria;o__Enterobacteriales;f__Enterobacteriaceae;g__Citrobacter;s__Citrobacter freundii                        |
| MLG 68 | 53  | 11412<br>36 | 73997      | 29691<br>1  | 26.02 | gii557470476 gb C<br>P006854.1  | 17891<br>38 | 30148<br>4  | 16.85 | 401 | k__Bacteria;p__Firmicutes;c__Bacilli;o__Lactobacillales;f__Lactobacillaceae;g__Pediococcus;s__Pediococcus pentosaceus                                         |
| MLG 69 | 34  | 11395<br>19 | 17417<br>6 | 10262<br>67 | 90.06 | gii619734722 gb C<br>P007557.1  | 50990<br>34 | 10402<br>95 | 20.4  | 267 | k__Bacteria;p__Proteobacteria;c__Gammaproteobacteria;o__Enterobacteriales;f__Enterobacteriaceae;g__Citrobacter;s__Citrobacter freundii                        |
| MLG 70 | 312 | 11117<br>66 | 24229      | 58852<br>2  | 52.94 | gii440045023 gb C<br>P003938.1  | 47621<br>79 | 58474<br>8  | 12.28 | 3   | k__Bacteria;p__Proteobacteria;c__Gammaproteobacteria;o__Enterobacteriales;f__Enterobacteriaceae;g__Unclassified;s__Enterobacteriaceae bacterium strain FGI 57 |
| MLG 71 | 171 | 10944<br>24 | 13119<br>3 | 53756<br>9  | 49.12 | gii557470476 gb C<br>P006854.1  | 17891<br>38 | 53385<br>7  | 29.84 | 401 | k__Bacteria;p__Firmicutes;c__Bacilli;o__Lactobacillales;f__Lactobacillaceae;g__Pediococcus;s__Pediococcus pentosaceus                                         |
| MLG 72 | 690 | 10835<br>51 | 16792      | 25570       | 2.36  | gii549807177 gb C<br>P006721.1  | 51078<br>14 | 27042       | 0.53  | 24  | k__Bacteria;p__Firmicutes;c__Clostridia;o__Clostridiales;f__Clostridiaceae;g__Clostridium;s__Clostridium saccharobutylicum                                    |
| MLG 73 | 162 | 10652<br>30 | 57986      | 83827<br>7  | 78.69 | gii41584196 gb AE<br>017198.1   | 19926<br>76 | 84167<br>6  | 42.24 | 193 | k__Bacteria;p__Firmicutes;c__Bacilli;o__Lactobacillales;f__Lactobacillaceae;g__Lactobacillus;s__Lactobacillus johnsonii                                       |
| MLG 74 | 96  | 10590<br>69 | 73012      | 95725<br>9  | 90.39 | gii338744031 emb <br>FR873482.1 | 22105<br>74 | 96220<br>1  | 43.53 | 375 | k__Bacteria;p__Firmicutes;c__Bacilli;o__Lactobacillales;f__Streptococcaceae;g__Streptococcus;s__Streptococcus salivarius                                      |
| MLG 75 | 519 | 10402<br>89 | 22426      | 0           | 0     | 0                               | -           | 0           | 0     | 0   | Unknow                                                                                                                                                        |
| MLG 76 | 25  | 10279<br>33 | 22410<br>8 | 88763<br>5  | 86.35 | gii269093698 gb C<br>P001820.1  | 21321<br>42 | 88169<br>6  | 41.35 | 91  | k__Bacteria;p__Firmicutes;c__Negativicutes;o__Selenomonadales;f__Veillonellaceae;g__Veillonella;s__Veillonella la parvula                                     |
| MLG 77 | 19  | 10216<br>75 | 19898<br>5 | 96062<br>2  | 94.02 | gii269093698 gb C<br>P001820.1  | 21321<br>42 | 97212<br>5  | 45.59 | 91  | k__Bacteria;p__Firmicutes;c__Negativicutes;o__Selenomonadales;f__Veillonellaceae;g__Veillonella;s__Veillonella la parvula                                     |
| MLG 78 | 106 | 10108<br>80 | 43102      | 28095       | 2.78  | gii328454937 gb C<br>P002628.1  | 21156<br>81 | 28103       | 1.33  | 882 | k__Bacteria;p__Actinobacteria;c__Actinobacteria;o__Coriobacteriales;f__Coriobacteriaceae;g__Coriobacterium;s__Coriobacterium glomerans                        |

|         |     |        |        |        |       |                              |         |        |       |      |                                                                                                                                              |
|---------|-----|--------|--------|--------|-------|------------------------------|---------|--------|-------|------|----------------------------------------------------------------------------------------------------------------------------------------------|
| MLG 79  | 122 | 990698 | 58821  | 743052 | 75    | gii480474683 gb C P004142.1  | 5398151 | 723616 | 13.4  | 14   | k__Bacteria;p__Proteobacteria;c__Gammaproteobacteria;o__Enterobacteriales;f__Enterobacteriaceae;g__Raoultella a;s__Raoultella omithinolytica |
| MLG 80  | 41  | 970244 | 143047 | 0      | 0     | 0                            | -       | 0      | 0     | 0    | Unknown                                                                                                                                      |
| MLG 81  | 555 | 926357 | 4758   | 362396 | 39.12 | gii334728683 gb C P000245.1  | 4070193 | 368042 | 9.04  | 812  | k__Bacteria;p__Proteobacteria;c__Betaproteobacteria;o__Burkholderiales;f__Comamonadaceae;g__Ramlibacter;s__Ramlibacter tatauiniensis         |
| MLG 82  | 434 | 884702 | 7869   | 884699 | 100   | gii514422290 gb C P004053.1  | 1938606 | 849248 | 43.81 | 898  | k__Bacteria;p__Actinobacteria;c__Actinobacteria;o__Bifidobacteriales;f__Bifidobacteriaceae;g__Bifidobacterium;s__Bifidobacterium animalis    |
| MLG 83  | 969 | 861841 | 16038  | 133800 | 15.52 | gii115249003 emb  AM180355.1 | 4290252 | 132707 | 3.09  | 22   | k__Bacteria;p__Firmicutes;c__Clostridia;o__Clostridiales;f__Peptostreptococcaceae;g__Peptoclostridium;s__Peptoclostridium difficile          |
| MLG 84  | 496 | 841665 | 10934  | 514907 | 61.18 | gii662712225 gb C P008823.1  | 4852980 | 484168 | 9.98  | 4    | k__Bacteria;p__Proteobacteria;c__Gammaproteobacteria;o__Enterobacteriales;f__Enterobacteriaceae;g__Enterobacter;s__Enterobacter cloacae      |
| MLG 85  | 190 | 816487 | 69447  | 37730  | 4.62  | gii372283141 emb  HE613569.1 | 2130034 | 60337  | 2.83  | 372  | k__Bacteria;p__Firmicutes;c__Bacilli;o__Lactobacillales;f__Streptococcaceae;g__Streptococcus;s__Streptococcus macedonicus                    |
| MLG 86  | 282 | 809037 | 25306  | 74388  | 9.19  | gii343179174 dbj  AP009332.1 | 1950135 | 79121  | 4.06  | 365  | k__Bacteria;p__Firmicutes;c__Bacilli;o__Lactobacillales;f__Streptococcaceae;g__Lactococcus;s__Lactococcus garvieae                           |
| MLG 87  | 36  | 806618 | 206601 | 745316 | 92.4  | gii640850664 gb C P007731.1  | 5241638 | 801960 | 15.3  | 7    | k__Bacteria;p__Proteobacteria;c__Gammaproteobacteria;o__Enterobacteriales;f__Enterobacteriaceae;g__Klebsiella a;s__Klebsiella pneumoniae     |
| MLG 88  | 16  | 782047 | 385024 | 0      | 0     | 0                            | -       | 0      | 0     | 0    | Unknown                                                                                                                                      |
| MLG 89  | 131 | 761333 | 46096  | 644005 | 84.59 | gii480474683 gb C P004142.1  | 5398151 | 646110 | 11.97 | 14   | k__Bacteria;p__Proteobacteria;c__Gammaproteobacteria;o__Enterobacteriales;f__Enterobacteriaceae;g__Raoultella a;s__Raoultella omithinolytica |
| MLG 90  | 116 | 735698 | 19583  | 679882 | 92.41 | gii325663854 gb C P002246.1  | 4552107 | 727182 | 15.97 | 296  | k__Bacteria;p__Proteobacteria;c__Gammaproteobacteria;o__Enterobacteriales;f__Enterobacteriaceae;g__Yersinia;s__Yersinia enterocolitica       |
| MLG 91  | 247 | 730785 | 16340  | 339336 | 46.43 | gii662712225 gb C P008823.1  | 4852980 | 326287 | 6.72  | 4    | k__Bacteria;p__Proteobacteria;c__Gammaproteobacteria;o__Enterobacteriales;f__Enterobacteriaceae;g__Enterobacter;s__Enterobacter cloacae      |
| MLG 92  | 129 | 715791 | 17408  | 0      | 0     | 0                            | -       | 0      | 0     | 0    | Unknown                                                                                                                                      |
| MLG 93  | 186 | 705157 | 10709  | 105936 | 15.02 | gii291548560 emb  FP929055.1 | 3341681 | 105930 | 3.17  | 163  | k__Bacteria;p__Firmicutes;c__Clostridia;o__Clostridiales;f__Lachnospiraceae;g__Blautia;s__[Ruminococcus] torques                             |
| MLG 94  | 315 | 704704 | 14689  | 90563  | 12.85 | gii188497817 gb C P001078.1  | 3659644 | 88779  | 2.43  | 20   | k__Bacteria;p__Firmicutes;c__Clostridia;o__Clostridiales;f__Clostridiaceae;g__Clostridium;s__Clostridium botulinum                           |
| MLG 95  | 99  | 697660 | 23404  | 143478 | 20.57 | gii523439782 gb C P006252.1  | 5238612 | 145131 | 2.77  | 274  | k__Bacteria;p__Proteobacteria;c__Gammaproteobacteria;o__Enterobacteriales;f__Enterobacteriaceae;g__Serratia;s__Serratia liquefaciens         |
| MLG 96  | 14  | 693032 | 218601 | 616130 | 88.9  | gii672600155 gb C P009114.1  | 5297511 | 593324 | 11.2  | 7    | k__Bacteria;p__Proteobacteria;c__Gammaproteobacteria;o__Enterobacteriales;f__Enterobacteriaceae;g__Klebsiella a;s__Klebsiella pneumoniae     |
| MLG 97  | 138 | 683941 | 26935  | 645617 | 94.4  | gii116100249 gb C P000419.1  | 1856368 | 651881 | 35.12 | 379  | k__Bacteria;p__Firmicutes;c__Bacilli;o__Lactobacillales;f__Streptococcaceae;g__Streptococcus;s__Streptococcus thermophilus                   |
| MLG 98  | 180 | 679117 | 17773  | 490647 | 72.25 | gii157320013 gb C P000826.1  | 5448853 | 501063 | 9.2   | 282  | k__Bacteria;p__Proteobacteria;c__Gammaproteobacteria;o__Enterobacteriales;f__Enterobacteriaceae;g__Serratia;s__Serratia proteamaculans       |
| MLG 99  | 46  | 670827 | 135310 | 171856 | 25.62 | gii160361034 gb C P000884.1  | 6767514 | 178916 | 2.64  | 1012 | k__Bacteria;p__Proteobacteria;c__Betaproteobacteria;o__Burkholderiales;f__Comamonadaceae;g__Delftia;s__Delftia acidovorans                   |
| MLG 100 | 121 | 661486 | 35191  | 54382  | 8.22  | gii116100249 gb C P000419.1  | 1856368 | 57754  | 3.11  | 379  | k__Bacteria;p__Firmicutes;c__Bacilli;o__Lactobacillales;f__Streptococcaceae;g__Streptococcus;s__Streptococcus thermophilus                   |
| MLG 101 | 206 | 632622 | 21690  | 333648 | 52.74 | gii388532432 gb C P003583.1  | 2698137 | 343002 | 12.71 | 165  | k__Bacteria;p__Firmicutes;c__Bacilli;o__Lactobacillales;f__Enterococcaceae;g__Enterococcus;s__Enterococcus faecium                           |
| MLG 102 | 16  | 629008 | 150319 | 76299  | 12.13 | gii556048476 gb C P006246.1  | 2240234 | 77406  | 3.46  | 34   | k__Bacteria;p__Firmicutes;c__Bacilli;o__Lactobacillales;f__Streptococcaceae;g__Streptococcus;s__Streptococcus suis                           |
| MLG 103 | 280 | 622524 | 15423  | 19487  | 3.13  | gii334279325 dbj  AP012053.1 | 2362241 | 29310  | 1.24  | 373  | k__Bacteria;p__Firmicutes;c__Bacilli;o__Lactobacillales;f__Streptococcaceae;g__Streptococcus;s__Streptococcus gallolyticus                   |
| MLG 104 | 109 | 582462 | 21755  | 189732 | 32.57 | gii674993598 dbj  AP014630.1 | 464848  | 189908 | 4.09  | 206  | k__Bacteria;p__Proteobacteria;c__Gammaproteobacteria;o__Pseudomonadales;f__Moraxellaceae;g__Acinetobacter;s__Acinetobacter guillouiae        |
| MLG 105 | 180 | 576136 | 18494  | 260410 | 45.2  | gii682108593 gb C P008897.1  | 4633407 | 260641 | 5.63  | 4    | k__Bacteria;p__Proteobacteria;c__Gammaproteobacteria;o__Enterobacteriales;f__Enterobacteriaceae;g__Enterobacter;s__Enterobacter cloacae      |

|         |     |        |        |        |       |                             |         |        |       |     |                                                                                                                                                               |
|---------|-----|--------|--------|--------|-------|-----------------------------|---------|--------|-------|-----|---------------------------------------------------------------------------------------------------------------------------------------------------------------|
| MLG 106 | 21  | 552938 | 134516 | 235092 | 42.52 | gii582030173 gb C P006659.1 | 5435369 | 247899 | 4.56  | 7   | k__Bacteria;p__Proteobacteria;c__Gammaproteobacteria;o__Enterobacteriales;f__Enterobacteriaceae;g__Klebsiella;a;s__Klebsiella pneumoniae                      |
| MLG 107 | 349 | 498391 | 11526  | 337785 | 67.78 | gii662712225 gb C P008823.1 | 4852980 | 322721 | 6.65  | 4   | k__Bacteria;p__Proteobacteria;c__Gammaproteobacteria;o__Enterobacteriales;f__Enterobacteriaceae;g__Enterobacter;s__Enterobacter cloacae                       |
| MLG 109 | 20  | 473884 | 89243  | 412270 | 89.03 | gii660550561 gb C P008700.1 | 5365144 | 417422 | 7.78  | 7   | k__Bacteria;p__Proteobacteria;c__Gammaproteobacteria;o__Enterobacteriales;f__Enterobacteriaceae;g__Klebsiella;a;s__Klebsiella pneumoniae                      |
| MLG 110 | 108 | 463069 | 24058  | 451530 | 99.36 | gii689262542 gb C P009451.1 | 4876443 | 466690 | 9.57  | 19  | k__Bacteria;p__Proteobacteria;c__Gammaproteobacteria;o__Enterobacteriales;f__Enterobacteriaceae;g__Cedecea;s__Cedecea neteri                                  |
| MLG 111 | 261 | 454445 | 4837   | 155701 | 34.3  | gii41584196 gb AE O17198.1  | 1992676 | 157027 | 7.88  | 193 | k__Bacteria;p__Firmicutes;c__Bacilli;o__Lactobacillales;f__Lactobacillaceae;g__Lactobacillus;s__Lactobacillus johnsonii                                       |
| MLG 112 | 57  | 453928 | 65464  | 25085  | 6.22  | gii188497817 gb C P001078.1 | 3659644 | 25100  | 0.69  | 20  | k__Bacteria;p__Firmicutes;c__Clostridia;o__Clostridiales;f__Clostridiaceae;g__Clostridium;s__Clostridium botulinum                                            |
| MLG 113 | 147 | 403446 | 11990  | 342592 | 85.62 | gii692326398 gb C P009472.1 | 2398044 | 294711 | 12.29 | 88  | k__Bacteria;p__Firmicutes;c__Bacilli;o__Lactobacillales;f__Streptococcaceae;g__Lactococcus;s__Lactococcus lactis                                              |
| MLG 114 | 83  | 400144 | 52350  | 190728 | 48.33 | gii156617157 gb C P000057.2 | 1914490 | 191740 | 10.02 | 164 | k__Bacteria;p__Proteobacteria;c__Gammaproteobacteria;o__Pasteurellales;f__Pasteurellaceae;g__Haemophilus;s__Haemophilus influenzae                            |
| MLG 115 | 139 | 394653 | 6956   | 285675 | 74.81 | gii269093698 gb C P001820.1 | 2132142 | 286655 | 13.44 | 91  | k__Bacteria;p__Firmicutes;c__Negativicutes;o__Selenomonadales;f__Veillonellaceae;g__Veillonella;s__Veillonella parvula                                        |
| MLG 116 | 51  | 381889 | 33354  | 186860 | 49.03 | gii124491690 emb AM406671.1 | 2529478 | 202812 | 8.02  | 88  | k__Bacteria;p__Firmicutes;c__Bacilli;o__Lactobacillales;f__Streptococcaceae;g__Lactococcus;s__Lactococcus lactis                                              |
| MLG 117 | 140 | 381110 | 18974  | 17596  | 4.62  | gii47118322 dbj B A000016.3 | 3031430 | 15541  | 0.51  | 21  | k__Bacteria;p__Firmicutes;c__Clostridia;o__Clostridiales;f__Clostridiaceae;g__Clostridium;s__Clostridium perfringens                                          |
| MLG 118 | 241 | 380830 | 8542   | 11192  | 2.94  | gii295089810 emb FP929037.1 | 3769775 | 11235  | 0.3   | 843 | k__Bacteria;p__Firmicutes;c__Clostridia;o__Clostridiales;f__Lachnospiraceae;g__Lachnoclostridium;s__Clostridium)saccharolyticum                               |
| MLG 119 | 54  | 380342 | 24563  | 122827 | 32.76 | gii291482100 emb FN665653.1 | 4047729 | 122878 | 3.04  | 22  | k__Bacteria;p__Firmicutes;c__Clostridia;o__Clostridiales;f__Peptostreptococcaceae;g__Peptoclostridium;s__Peptoclostridium difficile                           |
| MLG 120 | 372 | 374935 | 5504   | 356541 | 95.32 | gii571260215 emb HFS71988.1 | 4940199 | 371846 | 7.53  | 296 | k__Bacteria;p__Proteobacteria;c__Gammaproteobacteria;o__Enterobacteriales;f__Enterobacteriaceae;g__Yersinia;s__Yersinia enterocolitica                        |
| MLG 121 | 75  | 374030 | 12663  | 338159 | 90.63 | gii400173048 gb C P003737.1 | 4726582 | 343586 | 7.27  | 4   | k__Bacteria;p__Proteobacteria;c__Gammaproteobacteria;o__Enterobacteriales;f__Enterobacteriaceae;g__Enterobacter;s__Enterobacter cloacae                       |
| MLG 122 | 52  | 373117 | 29509  | 109536 | 29.45 | gii674993598 dbj AP014630.1 | 4648418 | 104985 | 2.26  | 206 | k__Bacteria;p__Proteobacteria;c__Gammaproteobacteria;o__Pseudomonadales;f__Moraxellaceae;g__Acinetobacter;s__Acinetobacter guillouiae                         |
| MLG 123 | 160 | 371929 | 9600   | 352272 | 96.9  | gii169752989 gb C P000946.1 | 4746218 | 337101 | 7.1   | 1   | k__Bacteria;p__Proteobacteria;c__Gammaproteobacteria;o__Enterobacteriales;f__Enterobacteriaceae;g__Escherichia;s__Escherichia coli                            |
| MLG 124 | 69  | 363556 | 28409  | 306853 | 85.82 | gii619734722 gb C P007557.1 | 5099034 | 314763 | 6.17  | 267 | k__Bacteria;p__Proteobacteria;c__Gammaproteobacteria;o__Enterobacteriales;f__Enterobacteriaceae;g__Citrobacter;s__Citrobacter freundii                        |
| MLG 125 | 13  | 357543 | 65880  | 20596  | 6.13  | gii283133067 dbj AP011540.1 | 2264603 | 20762  | 0.92  | 792 | k__Bacteria;p__Actinobacteria;c__Actinobacteria;o__Actinomycetales;f__Micrococcaceae;g__Rothia;s__Rothia mucilaginos                                          |
| MLG 127 | 242 | 335888 | 8144   | 289222 | 90.27 | gii472232670 dbj AP012167.1 | 2395134 | 292554 | 12.21 | 400 | k__Bacteria;p__Firmicutes;c__Bacilli;o__Lactobacillales;f__Lactobacillaceae;g__Lactobacillus;s__Lactobacillus brevis                                          |
| MLG 128 | 86  | 327280 | 30243  | 213879 | 67.23 | gii345091121 gb C P003026.1 | 4812833 | 207430 | 4.31  | 9   | k__Bacteria;p__Proteobacteria;c__Gammaproteobacteria;o__Enterobacteriales;f__Enterobacteriaceae;g__Enterobacter;s__Enterobacter asburiae                      |
| MLG 129 | 67  | 320395 | 14652  | 110177 | 35.4  | gii692326398 gb C P009472.1 | 2398044 | 106776 | 4.45  | 88  | k__Bacteria;p__Firmicutes;c__Bacilli;o__Lactobacillales;f__Streptococcaceae;g__Lactococcus;s__Lactococcus lactis                                              |
| MLG 130 | 166 | 318115 | 7483   | 284348 | 92.34 | gii294489418 gb C P001969.1 | 5108383 | 281906 | 5.52  | 1   | k__Bacteria;p__Proteobacteria;c__Gammaproteobacteria;o__Enterobacteriales;f__Enterobacteriaceae;g__Escherichia;s__Escherichia coli                            |
| MLG 131 | 192 | 311216 | 34447  | 3013   | 1     | gii309700213 emb FN649414.1 | 5153435 | 3014   | 0.06  | 1   | k__Bacteria;p__Proteobacteria;c__Gammaproteobacteria;o__Enterobacteriales;f__Enterobacteriaceae;g__Escherichia;s__Escherichia coli                            |
| MLG 132 | 10  | 307940 | 116684 | 12435  | 4.12  | gii527122546 gb C P003025.1 | 1975547 | 14033  | 0.71  | 207 | k__Bacteria;p__Firmicutes;c__Bacilli;o__Lactobacillales;f__Streptococcaceae;g__Streptococcus;s__Streptococcus lutetiensis                                     |
| MLG 133 | 40  | 302709 | 33268  | 217151 | 72.91 | gii440045023 gb C P003938.1 | 4762179 | 208882 | 4.39  | 3   | k__Bacteria;p__Proteobacteria;c__Gammaproteobacteria;o__Enterobacteriales;f__Enterobacteriaceae;g__Unclassified;s__Enterobacteriaceae bacterium strain FGI 57 |
| MLG 134 | 150 | 302067 | 11458  | 97161  | 32.77 | gii304557459 gb C P002154.1 | 3684607 | 98604  | 2.68  | 294 | k__Bacteria;p__Proteobacteria;c__Gammaproteobacteria;o__Enterobacteriales;f__Enterobacteriaceae;g__Edwardsiella;s__Edwardsiella tarda                         |

|         |     |        |        |        |       |                              |         |        |      |     |                                                                                                                                                               |
|---------|-----|--------|--------|--------|-------|------------------------------|---------|--------|------|-----|---------------------------------------------------------------------------------------------------------------------------------------------------------------|
| MLG 135 | 69  | 297815 | 10147  | 249471 | 86.12 | gii170517292 gb C P000970.1  | 5068389 | 238537 | 4.71 | 1   | k__Bacteria;p__Proteobacteria;c__Gammaproteobacteria;o__Enterobacteriales;f__Enterobacteriaceae;g__Escherichia;s__Escherichia coli                            |
| MLG 136 | 40  | 296530 | 23332  | 69120  | 24.27 | gii291482254 emb FN668944.1  | 4178227 | 69030  | 1.65 | 22  | k__Bacteria;p__Firmicutes;c__Clostridia;o__Clostridiales;f__Peptostreptococcaceae;g__Peptoclostridium;s__Peptoclostridium difficile                           |
| MLG 137 | 19  | 289662 | 84104  | 0      | 0     | 0                            | -       | 0      | 0    | 0   | Unknow                                                                                                                                                        |
| MLG 138 | 372 | 284760 | 18062  | 75162  | 26.65 | gii526120653 gb C P006603.1  | 2145445 | 76598  | 3.57 | 367 | k__Bacteria;p__Firmicutes;c__Bacilli;o__Lactobacillales;f__Lactobacillaceae;g__Lactobacillus;s__Lactobacillus reuteri                                         |
| MLG 139 | 8   | 284233 | 145963 | 184847 | 66.11 | gii612150118 gb C P007546.1  | 4561905 | 191512 | 4.2  | 9   | k__Bacteria;p__Proteobacteria;c__Gammaproteobacteria;o__Enterobacteriales;f__Enterobacteriaceae;g__Enterobacter;s__Enterobacter asburiae                      |
| MLG 140 | 21  | 282022 | 165878 | 69652  | 25.2  | gii47118322 dbj B A00016.3   | 3031430 | 67682  | 2.23 | 21  | k__Bacteria;p__Firmicutes;c__Clostridia;o__Clostridiales;f__Clostridiaceae;g__Clostridium;s__Clostridium perfringens                                          |
| MLG 141 | 106 | 279586 | 16395  | 47799  | 17.42 | gii325177128 emb FR824043.1  | 2356444 | 48773  | 2.07 | 373 | k__Bacteria;p__Firmicutes;c__Bacilli;o__Lactobacillales;f__Streptococcaceae;g__Streptococcus;s__Streptococcus gallolyticus                                    |
| MLG 142 | 133 | 276387 | 15322  | 106568 | 39.24 | gii295054830 gb C P001918.1  | 531454  | 107794 | 2.03 | 4   | k__Bacteria;p__Proteobacteria;c__Gammaproteobacteria;o__Enterobacteriales;f__Enterobacteriaceae;g__Enterobacter;s__Enterobacter cloacae                       |
| MLG 143 | 46  | 274369 | 28030  | 251090 | 93.37 | gii597512677 emb FO834906.1  | 5438894 | 265100 | 4.87 | 7   | k__Bacteria;p__Proteobacteria;c__Gammaproteobacteria;o__Enterobacteriales;f__Enterobacteriaceae;g__Klebsiella;s__Klebsiella pneumoniae                        |
| MLG 144 | 82  | 271583 | 18409  | 211848 | 81.72 | gii440045023 gb C P003938.1  | 4762179 | 215074 | 4.52 | 3   | k__Bacteria;p__Proteobacteria;c__Gammaproteobacteria;o__Enterobacteriales;f__Enterobacteriaceae;g__Unclassified;s__Enterobacteriaceae bacterium strain FGI 57 |
| MLG 145 | 19  | 268921 | 129286 | 17125  | 6.73  | gii281177210 dbj A P009378.1 | 4717338 | 17124  | 0.36 | 1   | k__Bacteria;p__Proteobacteria;c__Gammaproteobacteria;o__Enterobacteriales;f__Enterobacteriaceae;g__Escherichia;s__Escherichia coli                            |
| MLG 146 | 37  | 259228 | 21534  | 15082  | 6.05  | gii443901024 emb FO203355.1  | 5419609 | 15083  | 0.28 | 15  | k__Bacteria;p__Proteobacteria;c__Gammaproteobacteria;o__Enterobacteriales;f__Enterobacteriaceae;g__Enterobacter;s__Enterobacter aerogenes                     |
| MLG 147 | 42  | 254524 | 47249  | 88514  | 35.78 | gii392322800 gb C P003678.1  | 4968248 | 90359  | 1.82 | 4   | k__Bacteria;p__Proteobacteria;c__Gammaproteobacteria;o__Enterobacteriales;f__Enterobacteriaceae;g__Enterobacter;s__Enterobacter cloacae                       |
| MLG 148 | 40  | 249455 | 12788  | 243258 | 98.42 | gii170517292 gb C P000970.1  | 5068389 | 246120 | 4.86 | 1   | k__Bacteria;p__Proteobacteria;c__Gammaproteobacteria;o__Enterobacteriales;f__Enterobacteriaceae;g__Escherichia;s__Escherichia coli                            |
| MLG 149 | 60  | 247401 | 21580  | 126754 | 51.72 | gii682108593 gb C P008897.1  | 4633407 | 128585 | 2.78 | 4   | k__Bacteria;p__Proteobacteria;c__Gammaproteobacteria;o__Enterobacteriales;f__Enterobacteriaceae;g__Enterobacter;s__Enterobacter cloacae                       |
| MLG 150 | 21  | 247152 | 106940 | 32264  | 13.39 | gii549807177 gb C P006721.1  | 5107814 | 33867  | 0.66 | 24  | k__Bacteria;p__Firmicutes;c__Clostridia;o__Clostridiales;f__Clostridiaceae;g__Clostridium;s__Clostridium saccharobutylicum                                    |
| MLG 151 | 211 | 245063 | 18773  | 0      | 0     | 0                            | -       | 0      | 0    | 0   | Unknow                                                                                                                                                        |
| MLG 152 | 131 | 240868 | 14085  | 6770   | 2.82  | gii597512677 emb FO834906.1  | 5438894 | 6764   | 0.12 | 7   | k__Bacteria;p__Proteobacteria;c__Gammaproteobacteria;o__Enterobacteriales;f__Enterobacteriaceae;g__Klebsiella;s__Klebsiella pneumoniae                        |
| MLG 153 | 26  | 240511 | 28491  | 197888 | 84.19 | gii334279325 dbj A P012053.1 | 2362241 | 190552 | 8.07 | 373 | k__Bacteria;p__Firmicutes;c__Bacilli;o__Lactobacillales;f__Streptococcaceae;g__Streptococcus;s__Streptococcus gallolyticus                                    |
| MLG 154 | 12  | 240186 | 175538 | 9781   | 4.32  | gii527122546 gb C P003025.1  | 1975547 | 9901   | 0.5  | 207 | k__Bacteria;p__Firmicutes;c__Bacilli;o__Lactobacillales;f__Streptococcaceae;g__Streptococcus;s__Streptococcus lutetiensis                                     |
| MLG 155 | 33  | 235053 | 49078  | 48817  | 21.78 | gii41584196 gb AE 017198.1   | 1992676 | 49600  | 2.49 | 193 | k__Bacteria;p__Firmicutes;c__Bacilli;o__Lactobacillales;f__Lactobacillaceae;g__Lactobacillus;s__Lactobacillus johnsonii                                       |
| MLG 156 | 102 | 226607 | 28294  | 7408   | 3.32  | gii527122546 gb C P003025.1  | 1975547 | 7448   | 0.38 | 207 | k__Bacteria;p__Firmicutes;c__Bacilli;o__Lactobacillales;f__Streptococcaceae;g__Streptococcus;s__Streptococcus lutetiensis                                     |
| MLG 158 | 71  | 224141 | 20180  | 134291 | 60.49 | gii338744031 emb FR873482.1  | 2210574 | 137812 | 6.23 | 375 | k__Bacteria;p__Firmicutes;c__Bacilli;o__Lactobacillales;f__Streptococcaceae;g__Streptococcus;s__Streptococcus salivarius                                      |
| MLG 159 | 140 | 223453 | 12165  | 215561 | 98.24 | gii478439721 gb C P004856.1  | 3427276 | 215854 | 6.3  | 363 | k__Bacteria;p__Firmicutes;c__Bacilli;o__Lactobacillales;f__Enterococcaceae;g__Enterococcus;s__Enterococcus casseliflavus                                      |
| MLG 160 | 32  | 223130 | 147747 | 111450 | 51.61 | gii392322800 gb C P003678.1  | 4968248 | 121483 | 2.45 | 4   | k__Bacteria;p__Proteobacteria;c__Gammaproteobacteria;o__Enterobacteriales;f__Enterobacteriaceae;g__Enterobacter;s__Enterobacter cloacae                       |
| MLG 161 | 54  | 222017 | 16909  | 198367 | 93.13 | gii281177210 dbj A P009378.1 | 4717338 | 199398 | 4.23 | 1   | k__Bacteria;p__Proteobacteria;c__Gammaproteobacteria;o__Enterobacteriales;f__Enterobacteriaceae;g__Escherichia;s__Escherichia coli                            |
| MLG 162 | 43  | 219422 | 18200  | 3563   | 1.71  | gii320455049 dbj A P010888.1 | 2385164 | 4625   | 0.19 | 890 | k__Bacteria;p__Actinobacteria;c__Actinobacteria;o__Bifidobacteriales;f__Bifidobacteriaceae;g__Bifidobacterium;s__Bifidobacterium longum                       |

|         |     |        |       |        |       |                                 |         |        |      |      |                                                                                                                                               |
|---------|-----|--------|-------|--------|-------|---------------------------------|---------|--------|------|------|-----------------------------------------------------------------------------------------------------------------------------------------------|
| MLG 163 | 105 | 215947 | 19960 | 12865  | 6.24  | gii188497817 gb C<br>P001078.1  | 3659644 | 12571  | 0.34 | 20   | k__Bacteria;p__Firmicutes;c__Clostridia;o__Clostridiales;f__Clostridiaceae;g__Clostridium;s__Clostridium botulinum                            |
| MLG 164 | 22  | 213011 | 32134 | 115886 | 56.69 | gii619734722 gb C<br>P007557.1  | 5099034 | 122935 | 2.41 | 267  | k__Bacteria;p__Proteobacteria;c__Gammaproteobacteria;o__Enterobacteriales;f__Enterobacteriaceae;g__Citrobacter;s__Citrobacter freundii        |
| MLG 165 | 11  | 208456 | 47336 | 152285 | 76.69 | gii329666391 gb C<br>P002464.1  | 1966342 | 158813 | 8.08 | 193  | k__Bacteria;p__Firmicutes;c__Bacilli;o__Lactobacillales;f__Lactobacillaceae;g__Lactobacillus;s__Lactobacillus johnsonii                       |
| MLG 166 | 129 | 206294 | 11832 | 189468 | 97.45 | gii26111730 gb AE<br>014075.1   | 5231428 | 177720 | 3.4  | 1    | k__Bacteria;p__Proteobacteria;c__Gammaproteobacteria;o__Enterobacteriales;f__Enterobacteriaceae;g__Escherichia;s__Escherichia coli            |
| MLG 168 | 19  | 204416 | 49969 | 169773 | 89.81 | gii157065147 gb C<br>P000802.1  | 4643538 | 168406 | 3.63 | 1    | k__Bacteria;p__Proteobacteria;c__Gammaproteobacteria;o__Enterobacteriales;f__Enterobacteriaceae;g__Escherichia;s__Escherichia coli            |
| MLG 169 | 30  | 198579 | 34422 | 126542 | 67.32 | gii68342549 gb CP<br>000076.1   | 7074893 | 128623 | 1.82 | 463  | k__Bacteria;p__Proteobacteria;c__Gammaproteobacteria;o__Pseudomonadales;f__Pseudomonadaceae;g__Pseudomonas;s__Pseudomonas protegens           |
| MLG 170 | 33  | 194416 | 33081 | 6638   | 3.54  | gii110681940 gb C<br>P000312.1  | 2897393 | 8329   | 0.29 | 21   | k__Bacteria;p__Firmicutes;c__Clostridia;o__Clostridiales;f__Clostridiaceae;g__Clostridium;s__Clostridium perfringens                          |
| MLG 171 | 58  | 190222 | 21516 | 109780 | 58.98 | gii689262542 gb C<br>P009451.1  | 4876443 | 110874 | 2.27 | 19   | k__Bacteria;p__Proteobacteria;c__Gammaproteobacteria;o__Enterobacteriales;f__Enterobacteriaceae;g__Cedecea;s__Cedecea neteri                  |
| MLG 172 | 23  | 189040 | 29289 | 2568   | 1.38  | gii549807177 gb C<br>P006721.1  | 5107814 | 4954   | 0.1  | 24   | k__Bacteria;p__Firmicutes;c__Clostridia;o__Clostridiales;f__Clostridiaceae;g__Clostridium;s__Clostridium saccharobutylicum                    |
| MLG 173 | 114 | 187975 | 11399 | 36046  | 19.51 | gii569535620 gb C<br>P007025.1  | 4701875 | 36980  | 0.79 | 264  | k__Bacteria;p__Proteobacteria;c__Gammaproteobacteria;o__Enterobacteriales;f__Enterobacteriaceae;g__Escherichia;s__Escherichia albertii        |
| MLG 174 | 136 | 187254 | 9744  | 18270  | 99.16 | gii478439721 gb C<br>P004856.1  | 3427276 | 183549 | 5.36 | 363  | k__Bacteria;p__Firmicutes;c__Bacilli;o__Lactobacillales;f__Enterococcaceae;g__Enterococcus;s__Enterococcus casseliflavus                      |
| MLG 175 | 120 | 186143 | 12197 | 162206 | 89.02 | gii150839411 gb C<br>P000746.1  | 2319663 | 162083 | 6.99 | 1216 | k__Bacteria;p__Proteobacteria;c__Gammaproteobacteria;o__Pasteurellales;f__Pasteurellaceae;g__Actinobacillus;s__Actinobacillus succinogenes    |
| MLG 176 | 193 | 185772 | 10846 | 18058  | 9.98  | gii253778933 emb <br>FM162591.1 | 5064808 | 18043  | 0.36 | 306  | k__Bacteria;p__Proteobacteria;c__Gammaproteobacteria;o__Enterobacteriales;f__Enterobacteriaceae;g__Photorhabdus;s__Photorhabdus asymbiotica   |
| MLG 177 | 38  | 184722 | 27198 | 8846   | 4.92  | gii451782877 gb C<br>P004121.1  | 6530257 | 10475  | 0.16 | 35   | k__Bacteria;p__Firmicutes;c__Clostridia;o__Clostridiales;f__Clostridiaceae;g__Clostridium;s__Clostridium saccharoperbutylacetonicum           |
| MLG 178 | 22  | 184249 | 24343 | 167316 | 93.38 | gii325663854 gb C<br>P002246.1  | 4552107 | 199683 | 4.39 | 296  | k__Bacteria;p__Proteobacteria;c__Gammaproteobacteria;o__Enterobacteriales;f__Enterobacteriaceae;g__Yersinia;s__Yersinia enterocolitica        |
| MLG 179 | 90  | 182210 | 6812  | 153954 | 87.02 | gii480474683 gb C<br>P004142.1  | 5398151 | 157703 | 2.92 | 14   | k__Bacteria;p__Proteobacteria;c__Gammaproteobacteria;o__Enterobacteriales;f__Enterobacteriaceae;g__Raoultella;s__Raoultella omithinolytica    |
| MLG 180 | 9   | 180920 | 49432 | 45941  | 26.16 | gii188497817 gb C<br>P001078.1  | 3659644 | 45073  | 1.23 | 20   | k__Bacteria;p__Firmicutes;c__Clostridia;o__Clostridiales;f__Clostridiaceae;g__Clostridium;s__Clostridium botulinum                            |
| MLG 181 | 103 | 179730 | 21734 | 16804  | 9.62  | gii41584196 gb AE<br>017198.1   | 1992676 | 17095  | 0.86 | 193  | k__Bacteria;p__Firmicutes;c__Bacilli;o__Lactobacillales;f__Lactobacillaceae;g__Lactobacillus;s__Lactobacillus johnsonii                       |
| MLG 182 | 40  | 179185 | 14214 | 22670  | 13.07 | gii686507741 gb C<br>P006693.1  | 4574846 | 25724  | 0.56 | 5    | k__Bacteria;p__Proteobacteria;c__Gammaproteobacteria;o__Enterobacteriales;f__Enterobacteriaceae;g__Salmonella;s__Salmonella enterica          |
| MLG 183 | 34  | 176918 | 17381 | 77202  | 44.59 | gii329666391 gb C<br>P002464.1  | 1966342 | 79156  | 4.03 | 193  | k__Bacteria;p__Firmicutes;c__Bacilli;o__Lactobacillales;f__Lactobacillaceae;g__Lactobacillus;s__Lactobacillus johnsonii                       |
| MLG 184 | 108 | 175604 | 9624  | 58433  | 33.85 | gii118764602 dbj <br>AP009256.1 | 2089645 | 59052  | 2.83 | 893  | k__Bacteria;p__Actinobacteria;c__Actinobacteria;o__Bifidobacteriales;f__Bifidobacteriaceae;g__Bifidobacterium;s__Bifidobacterium adolescentis |
| MLG 185 | 126 | 174631 | 18846 | 0      | 0     | 0                               | -       | 0      | 0    | 0    | Unknown                                                                                                                                       |
| MLG 186 | 8   | 173462 | 49469 | 39072  | 23.14 | gii526120653 gb C<br>P006603.1  | 2145445 | 39964  | 1.86 | 367  | k__Bacteria;p__Firmicutes;c__Bacilli;o__Lactobacillales;f__Lactobacillaceae;g__Lactobacillus;s__Lactobacillus reuteri                         |
| MLG 187 | 76  | 173139 | 20203 | 41957  | 25.13 | gii325177128 emb <br>FR824043.1 | 2356444 | 44015  | 1.87 | 373  | k__Bacteria;p__Firmicutes;c__Bacilli;o__Lactobacillales;f__Streptococcaceae;g__Streptococcus;s__Streptococcus gallolyticus                    |
| MLG 188 | 41  | 172605 | 21143 | 0      | 0     | 0                               | -       | 0      | 0    | 0    | Unknown                                                                                                                                       |
| MLG 189 | 41  | 171047 | 8455  | 0      | 0     | 0                               | -       | 0      | 0    | 0    | Unknown                                                                                                                                       |
| MLG 191 | 30  | 168884 | 23999 | 52579  | 32.64 | gii122087364 emb <br>AM286415.1 | 4615899 | 58407  | 1.27 | 296  | k__Bacteria;p__Proteobacteria;c__Gammaproteobacteria;o__Enterobacteriales;f__Enterobacteriaceae;g__Yersinia;s__Yersinia enterocolitica        |

|         |     |            |            |            |       |                                  |             |            |      |     |                                                                                                                                           |
|---------|-----|------------|------------|------------|-------|----------------------------------|-------------|------------|------|-----|-------------------------------------------------------------------------------------------------------------------------------------------|
| MLG 192 | 60  | 16697<br>2 | 21064      | 15661<br>6 | 97.3  | gii443901024[emb]<br>FO203355.1] | 54196<br>09 | 16523<br>1 | 3.05 | 15  | k__Bacteria;p__Proteobacteria;c__Gammaproteobacteria;o__Enterobacteriales;f__Enterobacteriaceae;g__Enterobacter;s__Enterobacter aerogenes |
| MLG 193 | 293 | 16517<br>9 | 3699       | 89989      | 56.91 | gii512154926[gb]C<br>P006011.1]  | 19477<br>06 | 10632<br>2 | 5.46 | 367 | k__Bacteria;p__Firmicutes;c__Bacilli;o__Lactobacillales;f__Lactobacillaceae;g__Lactobacillus;s__Lactobacillus reuteri                     |
| MLG 194 | 222 | 16484<br>6 | 5026       | 0          | 0     | 0                                | -           | 0          | 0    | 0   | Unknow                                                                                                                                    |
| MLG 195 | 12  | 16226<br>3 | 54719      | 14200<br>9 | 91.51 | gii343179174[dbj]<br>AP009332.1] | 19501<br>35 | 15080<br>5 | 7.73 | 365 | k__Bacteria;p__Firmicutes;c__Bacilli;o__Lactobacillales;f__Streptococcaceae;g__Lactococcus;s__Lactococcus garvieae                        |
| MLG 196 | 28  | 16110<br>8 | 18720      | 93963      | 60.7  | gii349736152[gb]C<br>P003034.1]  | 53135<br>31 | 94377      | 1.78 | 1   | k__Bacteria;p__Proteobacteria;c__Gammaproteobacteria;o__Enterobacteriales;f__Enterobacteriaceae;g__Escherichia;s__Escherichia coli        |
| MLG 197 | 22  | 16095<br>4 | 33623      | 17087      | 11.05 | gii301318648[gb]C<br>P002106.1]  | 20518<br>96 | 17864      | 0.87 | 885 | k__Bacteria;p__Actinobacteria;c__Actinobacteria;o__Coriobacteriales;f__Coriobacteriaceae;g__Olsenella;s__Olsenella uli                    |
| MLG 198 | 7   | 15811<br>2 | 55387      | 13654<br>6 | 89.06 | gii402539130[gb]C<br>P003785.1]  | 53867<br>05 | 14046<br>0 | 2.61 | 7   | k__Bacteria;p__Proteobacteria;c__Gammaproteobacteria;o__Enterobacteriales;f__Enterobacteriaceae;g__Klebsiella;s__Klebsiella pneumoniae    |
| MLG 199 | 300 | 15607<br>2 | 1422       | 8388       | 5.51  | gii28204652[gb]AE<br>015927.1]   | 27992<br>51 | 8207       | 0.29 | 43  | k__Bacteria;p__Firmicutes;c__Clostridia;o__Clostridiales;f__Clostridiaceae;g__Clostridium;s__Clostridium tetani                           |
| MLG 200 | 40  | 15517<br>8 | 31235      | 13512<br>0 | 89.96 | gii339277069[emb]<br>FR875178.1] | 19299<br>05 | 14850<br>3 | 7.69 | 379 | k__Bacteria;p__Firmicutes;c__Bacilli;o__Lactobacillales;f__Streptococcaceae;g__Streptococcus;s__Streptococcus thermophilus                |
| MLG 201 | 13  | 15480<br>6 | 41574      | 0          | 0     | 0                                | -           | 0          | 0    | 0   | Unknow                                                                                                                                    |
| MLG 202 | 35  | 15462<br>3 | 13167      | 14455<br>3 | 98.23 | gii342240345[emb]<br>AL935263.2] | 33082<br>73 | 16452<br>8 | 4.97 | 385 | k__Bacteria;p__Firmicutes;c__Bacilli;o__Lactobacillales;f__Lactobacillaceae;g__Lactobacillus;s__Lactobacillus plantarum                   |
| MLG 203 | 5   | 15332<br>4 | 55741      | 13530<br>4 | 93.44 | gii512154926[gb]C<br>P006011.1]  | 19477<br>06 | 14336<br>5 | 7.36 | 367 | k__Bacteria;p__Firmicutes;c__Bacilli;o__Lactobacillales;f__Lactobacillaceae;g__Lactobacillus;s__Lactobacillus reuteri                     |
| MLG 204 | 139 | 15210<br>6 | 10087      | 38919      | 27.62 | gii308044682[gb]C<br>P002222.1]  | 32543<br>76 | 39875      | 1.23 | 385 | k__Bacteria;p__Firmicutes;c__Bacilli;o__Lactobacillales;f__Lactobacillaceae;g__Lactobacillus;s__Lactobacillus plantarum                   |
| MLG 205 | 48  | 15019<br>7 | 13657      | 82051      | 58.53 | gii526120653[gb]C<br>P006603.1]  | 21454<br>45 | 89918      | 4.19 | 367 | k__Bacteria;p__Firmicutes;c__Bacilli;o__Lactobacillales;f__Lactobacillaceae;g__Lactobacillus;s__Lactobacillus reuteri                     |
| MLG 206 | 12  | 14830<br>1 | 42354      | 5195       | 3.75  | gii187720473[gb]C<br>P001056.1]  | 38003<br>27 | 5302       | 0.14 | 20  | k__Bacteria;p__Firmicutes;c__Clostridia;o__Clostridiales;f__Clostridiaceae;g__Clostridium;s__Clostridium botulinum                        |
| MLG 207 | 11  | 14716<br>2 | 32555      | 42639      | 31.4  | gii334281572[dbj]<br>AP012054.1] | 21000<br>77 | 41307      | 1.97 | 368 | k__Bacteria;p__Firmicutes;c__Bacilli;o__Lactobacillales;f__Streptococcaceae;g__Streptococcus;s__Streptococcus pasteurianus                |
| MLG 208 | 14  | 14480<br>3 | 10117<br>0 | 13091<br>8 | 96.81 | gii307551844[gb]C<br>P001671.1]  | 51313<br>97 | 13143<br>3 | 2.56 | 1   | k__Bacteria;p__Proteobacteria;c__Gammaproteobacteria;o__Enterobacteriales;f__Enterobacteriaceae;g__Escherichia;s__Escherichia coli        |
| MLG 209 | 28  | 14090<br>4 | 31718      | 12278<br>2 | 91.59 | gii222031834[emb]<br>CU651637.1] | 47731<br>08 | 77303      | 1.62 | 1   | k__Bacteria;p__Proteobacteria;c__Gammaproteobacteria;o__Enterobacteriales;f__Enterobacteriaceae;g__Escherichia;s__Escherichia coli        |
| MLG 210 | 17  | 14019<br>5 | 21534      | 97591      | 73.05 | gii334281572[dbj]<br>AP012054.1] | 21000<br>77 | 99103      | 4.72 | 368 | k__Bacteria;p__Firmicutes;c__Bacilli;o__Lactobacillales;f__Streptococcaceae;g__Streptococcus;s__Streptococcus pasteurianus                |
| MLG 211 | 80  | 13851<br>9 | 8508       | 52180      | 39.42 | gii315059226[gb]C<br>P002185.1]  | 49009<br>68 | 53530      | 1.09 | 1   | k__Bacteria;p__Proteobacteria;c__Gammaproteobacteria;o__Enterobacteriales;f__Enterobacteriaceae;g__Escherichia;s__Escherichia coli        |
| MLG 212 | 12  | 13578<br>8 | 51751      | 23004      | 17.4  | gii288730948[emb]<br>FN597254.1] | 23509<br>11 | 26742      | 1.14 | 373 | k__Bacteria;p__Firmicutes;c__Bacilli;o__Lactobacillales;f__Streptococcaceae;g__Streptococcus;s__Streptococcus gallolyticus                |
| MLG 213 | 16  | 13522<br>5 | 36500      | 22074      | 16.72 | gii527122546[gb]C<br>P003025.1]  | 19755<br>47 | 22896      | 1.16 | 207 | k__Bacteria;p__Firmicutes;c__Bacilli;o__Lactobacillales;f__Streptococcaceae;g__Streptococcus;s__Streptococcus lutetiensis                 |
| MLG 214 | 5   | 13405<br>7 | 40618      | 0          | 0     | 0                                | -           | 0          | 0    | 0   | Unknow                                                                                                                                    |
| MLG 215 | 10  | 13359<br>4 | 48642      | 0          | 0     | 0                                | -           | 0          | 0    | 0   | Unknow                                                                                                                                    |
| MLG 216 | 10  | 13238<br>0 | 49331      | 23553      | 18.22 | gii326539903[gb]C<br>P002582.1]  | 47142<br>37 | 23537      | 0.5  | 51  | k__Bacteria;p__Firmicutes;c__Clostridia;o__Clostridiales;f__Lachnospiraceae;g__Cellulosilyticum;s__Cellulosilyticum lentocellum           |
| MLG 217 | 25  | 13221<br>0 | 25601      | 2172       | 1.71  | gii329124738[gb]C<br>P002410.1]  | 27731<br>57 | 2299       | 0.08 | 20  | k__Bacteria;p__Firmicutes;c__Clostridia;o__Clostridiales;f__Clostridiaceae;g__Clostridium;s__Clostridium botulinum                        |
| MLG 218 | 10  | 13205<br>8 | 82716      | 45674      | 36.1  | gii365906294[gb]C<br>P003218.1]  | 59741<br>09 | 46521      | 0.78 | 12  | k__Bacteria;p__Proteobacteria;c__Gammaproteobacteria;o__Enterobacteriales;f__Enterobacteriaceae;g__Klebsiella;s__Klebsiella oxytoca       |



|         |     |        |       |        |       |                                 |         |        |      |     |                                                                                                                                                               |
|---------|-----|--------|-------|--------|-------|---------------------------------|---------|--------|------|-----|---------------------------------------------------------------------------------------------------------------------------------------------------------------|
| MLG 220 | 14  | 131629 | 28709 | 9373   | 7.54  | gii529202214 gb C<br>P006620.1  | 2994661 | 13734  | 0.46 | 165 | k__Bacteria;p__Firmicutes;c__Bacilli;o__Lactobacillales;f__Enterococcaceae;g__Enterococcus;s__Enterococcus faecium                                            |
| MLG 221 | 210 | 129935 | 1480  | 116163 | 94.18 | gii569535620 gb C<br>P007025.1  | 4701875 | 113390 | 2.41 | 264 | k__Bacteria;p__Proteobacteria;c__Gammaproteobacteria;o__Enterobacteriales;f__Enterobacteriaceae;g__Escherichia;s__Escherichia albertii                        |
| MLG 222 | 83  | 129295 | 22060 | 31477  | 25.86 | gii582030173 gb C<br>P006659.1  | 5435369 | 45230  | 0.83 | 7   | k__Bacteria;p__Proteobacteria;c__Gammaproteobacteria;o__Enterobacteriales;f__Enterobacteriaceae;g__Klebsiella;s__Klebsiella pneumoniae                        |
| MLG 223 | 117 | 126936 | 5379  | 91705  | 75.41 | gii440045023 gb C<br>P003938.1  | 4762179 | 92916  | 1.95 | 3   | k__Bacteria;p__Proteobacteria;c__Gammaproteobacteria;o__Enterobacteriales;f__Enterobacteriaceae;g__Unclassified;s__Enterobacteriaceae bacterium strain FGI 57 |
| MLG 224 | 22  | 126520 | 26953 | 76821  | 64.1  | gii514423830 gb C<br>P006250.1  | 5328010 | 76972  | 1.44 | 278 | k__Bacteria;p__Proteobacteria;c__Gammaproteobacteria;o__Enterobacteriales;f__Enterobacteriaceae;g__Serratia;s__Serratia plymuthica                            |
| MLG 225 | 5   | 125488 | 62462 | 86974  | 72.72 | gii480474683 gb C<br>P004142.1  | 5398151 | 87971  | 1.63 | 14  | k__Bacteria;p__Proteobacteria;c__Gammaproteobacteria;o__Enterobacteriales;f__Enterobacteriaceae;g__Raoultella;a__Raoultella omithinolytica                    |
| MLG 226 | 84  | 124302 | 4054  | 116681 | 98.26 | gii573966439 gb C<br>P006027.1  | 5585613 | 106125 | 1.9  | 1   | k__Bacteria;p__Proteobacteria;c__Gammaproteobacteria;o__Enterobacteriales;f__Enterobacteriaceae;g__Escherichia;s__Escherichia coli                            |
| MLG 227 | 26  | 123335 | 20511 | 90216  | 77.86 | gii619734722 gb C<br>P007557.1  | 5099034 | 91026  | 1.79 | 267 | k__Bacteria;p__Proteobacteria;c__Gammaproteobacteria;o__Enterobacteriales;f__Enterobacteriaceae;g__Citrobacter;s__Citrobacter freundii                        |
| MLG 228 | 9   | 121725 | 33831 | 20070  | 17.53 | gii552063405 gb C<br>P006766.1  | 2589250 | 23716  | 0.92 | 88  | k__Bacteria;p__Firmicutes;c__Bacilli;o__Lactobacillales;f__Streptococcaceae;g__Lactococcus;s__Lactococcus lactis                                              |
| MLG 229 | 8   | 121608 | 98257 | 97995  | 86.28 | gii170517292 gb C<br>P000970.1  | 5068389 | 96916  | 1.91 | 1   | k__Bacteria;p__Proteobacteria;c__Gammaproteobacteria;o__Enterobacteriales;f__Enterobacteriaceae;g__Escherichia;s__Escherichia coli                            |
| MLG 230 | 39  | 119850 | 10385 | 99784  | 87.93 | gii170517292 gb C<br>P000970.1  | 5068389 | 69240  | 1.37 | 1   | k__Bacteria;p__Proteobacteria;c__Gammaproteobacteria;o__Enterobacteriales;f__Enterobacteriaceae;g__Escherichia;s__Escherichia coli                            |
| MLG 231 | 77  | 119609 | 8051  | 73633  | 64.92 | gii660567586 gb C<br>P008788.1  | 6152190 | 81409  | 1.32 | 12  | k__Bacteria;p__Proteobacteria;c__Gammaproteobacteria;o__Enterobacteriales;f__Enterobacteriaceae;g__Klebsiella;a__Klebsiella oxytoca                           |
| MLG 232 | 11  | 118745 | 33368 | 110354 | 98.53 | gii612150118 gb C<br>P007546.1  | 4561905 | 113967 | 2.5  | 9   | k__Bacteria;p__Firmicutes;c__Bacilli;o__Lactobacillales;f__Lactobacillaceae;g__Lactobacillus;s__Lactobacillus salivarius                                      |
| MLG 233 | 10  | 115869 | 45008 | 55683  | 50.47 | gii392334715 gb C<br>P003504.1  | 2827741 | 55532  | 1.96 | 108 | k__Bacteria;p__Firmicutes;c__Bacilli;o__Lactobacillales;f__Enterococcaceae;g__Enterococcus;s__Enterococcus hirae                                              |
| MLG 234 | 20  | 114467 | 20104 | 64019  | 58.81 | gii480474683 gb C<br>P004142.1  | 5398151 | 64182  | 1.19 | 14  | k__Bacteria;p__Proteobacteria;c__Gammaproteobacteria;o__Enterobacteriales;f__Enterobacteriaceae;g__Raoultella;a__Raoultella omithinolytica                    |
| MLG 235 | 12  | 113572 | 25560 | 59806  | 55.12 | gii690347849 gb C<br>P007646.1  | 1836297 | 63321  | 3.45 | 192 | k__Bacteria;p__Firmicutes;c__Bacilli;o__Lactobacillales;f__Lactobacillaceae;g__Lactobacillus;s__Lactobacillus salivarius                                      |
| MLG 236 | 7   | 113484 | 36448 | 104825 | 97.04 | gii472232670 dbj <br>AP012167.1 | 2395134 | 106658 | 4.45 | 400 | k__Bacteria;p__Firmicutes;c__Bacilli;o__Lactobacillales;f__Lactobacillaceae;g__Lactobacillus;s__Lactobacillus brevis                                          |
| MLG 237 | 4   | 113426 | 50515 | 5355   | 4.99  | gii229359445 emb <br>AM181176.4 | 6722539 | 5356   | 0.08 | 317 | k__Bacteria;p__Proteobacteria;c__Gammaproteobacteria;o__Pseudomonadales;f__Pseudomonadaceae;g__Pseudomonas;s__Pseudomonas fluorescens                         |
| MLG 238 | 17  | 111999 | 41936 | 67019  | 62.72 | gii480474683 gb C<br>P004142.1  | 5398151 | 70408  | 1.3  | 14  | k__Bacteria;p__Proteobacteria;c__Gammaproteobacteria;o__Enterobacteriales;f__Enterobacteriaceae;g__Raoultella;a__Raoultella omithinolytica                    |
| MLG 239 | 33  | 110331 | 13923 | 42725  | 40.71 | gii674993598 dbj <br>AP014630.1 | 4648418 | 41719  | 0.9  | 206 | k__Bacteria;p__Proteobacteria;c__Gammaproteobacteria;o__Pseudomonadales;f__Moraxellaceae;g__Acinetobacter;s__Acinetobacter guillouiae                         |
| MLG 240 | 20  | 108855 | 15503 | 14941  | 14.32 | gii674993598 dbj <br>AP014630.1 | 4648418 | 15389  | 0.33 | 206 | k__Bacteria;p__Proteobacteria;c__Gammaproteobacteria;o__Pseudomonadales;f__Moraxellaceae;g__Acinetobacter;s__Acinetobacter guillouiae                         |
| MLG 241 | 12  | 108502 | 41852 | 103166 | 100   | gii219620149 gb C<br>P001213.1  | 1933695 | 103329 | 5.34 | 898 | k__Bacteria;p__Actinobacteria;c__Actinobacteria;o__Bifidobacteriales;f__Bifidobacteriaceae;g__Bifidobacterium;s__Bifidobacterium animalis                     |
| MLG 242 | 22  | 108027 | 12034 | 0      | 0     | 0                               | -       | 0      | 0    | 0   | Unknow                                                                                                                                                        |
| MLG 243 | 8   | 107228 | 36138 | 85213  | 82.78 | gii480474683 gb C<br>P004142.1  | 5398151 | 86180  | 1.6  | 14  | k__Bacteria;p__Proteobacteria;c__Gammaproteobacteria;o__Enterobacteriales;f__Enterobacteriaceae;g__Raoultella;a__Raoultella omithinolytica                    |
| MLG 244 | 20  | 106858 | 19578 | 27727  | 27.24 | gii291548560 emb <br>FP929055.1 | 3341681 | 27723  | 0.83 | 163 | k__Bacteria;p__Firmicutes;c__Clostridia;o__Clostridiales;f__Lachnospiraceae;g__Blautia;s__Blautia [Ruminococcus] torques                                      |
| MLG 245 | 48  | 104939 | 9372  | 66408  | 65.26 | gii526120653 gb C<br>P006603.1  | 2145445 | 80254  | 3.74 | 367 | k__Bacteria;p__Firmicutes;c__Bacilli;o__Lactobacillales;f__Lactobacillaceae;g__Lactobacillus;s__Lactobacillus reuteri                                         |
| MLG 246 | 22  | 104360 | 9772  | 42287  | 42    | gii372283141 emb <br>HE613569.1 | 2130034 | 44604  | 2.09 | 372 | k__Bacteria;p__Firmicutes;c__Bacilli;o__Lactobacillales;f__Streptococcaceae;g__Streptococcus;s__Streptococcus macedonicus                                     |

|         |    |        |       |       |       |                             |         |        |      |     |                                                                                                                                            |
|---------|----|--------|-------|-------|-------|-----------------------------|---------|--------|------|-----|--------------------------------------------------------------------------------------------------------------------------------------------|
| MLG 247 | 48 | 103166 | 14452 | 57556 | 57.18 | gii528171613 gb C P006631.1 | 4915960 | 44170  | 0.9  | 5   | k__Bacteria;p__Proteobacteria;c__Gammaproteobacteria;o__Enterobacteriales;f__Enterobacteriaceae;g__Salmonella;s__Salmonella enterica       |
| MLG 248 | 7  | 103148 | 21021 | 65865 | 65.58 | gii480474683 gb C P004142.1 | 5398151 | 62901  | 1.17 | 14  | k__Bacteria;p__Proteobacteria;c__Gammaproteobacteria;o__Enterobacteriales;f__Enterobacteriaceae;g__Raoultella;a__Raoultella omithinolytica |
| MLG 249 | 15 | 102935 | 28721 | 12855 | 12.82 | gii372283141 emb HE613569.1 | 2130034 | 14179  | 0.67 | 372 | k__Bacteria;p__Firmicutes;c__Bacilli;o__Lactobacillales;f__Streptococcaceae;g__Streptococcus;s__Streptococcus macedonicus                  |
| MLG 250 | 31 | 101777 | 9982  | 68452 | 68.52 | gii295054830 gb C P001918.1 | 5314581 | 66861  | 1.26 | 4   | k__Bacteria;p__Proteobacteria;c__Gammaproteobacteria;o__Enterobacteriales;f__Enterobacteriaceae;g__Enterobacter;s__Enterobacter cloacae    |
| MLG 251 | 10 | 101754 | 22460 | 35917 | 36.02 | gii282947233 emb FN543502.1 | 5346659 | 71568  | 1.34 | 266 | k__Bacteria;p__Proteobacteria;c__Gammaproteobacteria;o__Enterobacteriales;f__Enterobacteriaceae;g__Citrobacter;s__Citrobacter rodentium    |
| MLG 252 | 15 | 100676 | 57842 | 23915 | 24.26 | gii692332123 gb C P009531.1 | 1926135 | 23851  | 1.24 | 233 | k__Bacteria;p__Firmicutes;c__Bacilli;o__Lactobacillales;f__Lactobacillaceae;g__Lactobacillus;s__Lactobacillus sp. wkB8                     |
| MLG 253 | 6  | 100656 | 35650 | 16229 | 16.59 | gii307551844 gb C P001671.1 | 5131397 | 16231  | 0.32 | 1   | k__Bacteria;p__Proteobacteria;c__Gammaproteobacteria;o__Enterobacteriales;f__Enterobacteriaceae;g__Escherichia;s__Escherichia coli         |
| MLG 254 | 21 | 100427 | 12202 | 95913 | 99.94 | gii448273020 gb C P004082.1 | 3203964 | 103497 | 3.23 | 385 | k__Bacteria;p__Firmicutes;c__Bacilli;o__Lactobacillales;f__Lactobacillaceae;g__Lactobacillus;s__Lactobacillus plantarum                    |
| MLG 255 | 36 | 100298 | 11422 | 4603  | 4.86  | gii603129120 gb C P007332.1 | 4807994 | 4609   | 0.1  | 5   | k__Bacteria;p__Proteobacteria;c__Gammaproteobacteria;o__Enterobacteriales;f__Enterobacteriaceae;g__Salmonella;s__Salmonella enterica       |
| MLG 256 | 54 | 99906  | 14324 | 6895  | 7.28  | gii160426828 gb C P000885.1 | 4847594 | 6896   | 0.14 | 110 | k__Bacteria;p__Firmicutes;c__Clostridia;o__Clostridiales;f__Lachnospiraceae;g__Lachnoclostridium;s__Lachnoclostridium phytofermentans      |
| MLG 257 | 9  | 99727  | 32207 | 91619 | 97.49 | gii150953431 gb C P000647.1 | 5315120 | 93405  | 1.76 | 7   | k__Bacteria;p__Proteobacteria;c__Gammaproteobacteria;o__Enterobacteriales;f__Enterobacteriaceae;g__Klebsiella;a__Klebsiella pneumoniae     |
| MLG 258 | 40 | 98561  | 9450  | 16565 | 17.66 | gii150953431 gb C P000647.1 | 5315120 | 17576  | 0.33 | 7   | k__Bacteria;p__Proteobacteria;c__Gammaproteobacteria;o__Enterobacteriales;f__Enterobacteriaceae;g__Klebsiella;a__Klebsiella pneumoniae     |
| MLG 259 | 13 | 97839  | 27476 | 19482 | 20.8  | gii334279325 dbj AP012053.1 | 2362241 | 19528  | 0.83 | 373 | k__Bacteria;p__Firmicutes;c__Bacilli;o__Lactobacillales;f__Streptococcaceae;g__Streptococcus;s__Streptococcus gallolyticus                 |
| MLG 260 | 10 | 95970  | 44147 | 0     | 0     | 0                           | -       | 0      | 0    | 0   | Unknow                                                                                                                                     |
| MLG 261 | 8  | 94766  | 31085 | 31274 | 33.62 | gii394343076 gb C P003683.1 | 6097032 | 31969  | 0.52 | 12  | k__Bacteria;p__Proteobacteria;c__Gammaproteobacteria;o__Enterobacteriales;f__Enterobacteriaceae;g__Klebsiella;a__Klebsiella oxytoca        |
| MLG 262 | 33 | 94697  | 7739  | 36680 | 39.59 | gii526120653 gb C P006603.1 | 2145445 | 49719  | 2.32 | 367 | k__Bacteria;p__Firmicutes;c__Bacilli;o__Lactobacillales;f__Lactobacillaceae;g__Lactobacillus;s__Lactobacillus reuteri                      |
| MLG 263 | 9  | 93975  | 47364 | 2344  | 2.54  | gii662712225 gb C P008823.1 | 4852980 | 2346   | 0.05 | 4   | k__Bacteria;p__Proteobacteria;c__Gammaproteobacteria;o__Enterobacteriales;f__Enterobacteriaceae;g__Enterobacter;s__Enterobacter cloacae    |
| MLG 264 | 9  | 93820  | 19620 | 0     | 0     | 0                           | -       | 0      | 0    | 0   | Unknow                                                                                                                                     |
| MLG 265 | 10 | 93671  | 28914 | 82414 | 92.38 | gii257751862 dbj AP010953.1 | 5697240 | 81813  | 1.44 | 1   | k__Bacteria;p__Proteobacteria;c__Gammaproteobacteria;o__Enterobacteriales;f__Enterobacteriaceae;g__Escherichia;s__Escherichia coli         |
| MLG 266 | 84 | 93446  | 4223  | 11361 | 12.75 | gii219620149 gb C P001213.1 | 1933695 | 11631  | 0.6  | 898 | k__Bacteria;p__Actinobacteria;c__Actinobacteria;o__Bifidobacteriales;f__Bifidobacteriaceae;g__Bifidobacterium;s__Bifidobacterium animalis  |
| MLG 268 | 11 | 93020  | 17334 | 3872  | 4.36  | gii326539903 gb C P002582.1 | 4714237 | 3880   | 0.08 | 51  | k__Bacteria;p__Firmicutes;c__Clostridia;o__Clostridiales;f__Lachnospiraceae;g__Cellulosilyticum;s__Cellulosilyticum lentocellum            |
| MLG 269 | 8  | 92660  | 35695 | 79092 | 89.18 | gii26111730 gb AE 014075.1  | 5231428 | 79118  | 1.51 | 1   | k__Bacteria;p__Proteobacteria;c__Gammaproteobacteria;o__Enterobacteriales;f__Enterobacteriaceae;g__Escherichia;s__Escherichia coli         |
| MLG 270 | 14 | 92240  | 15813 | 33919 | 38.34 | gii343179174 dbj AP009332.1 | 1950135 | 33952  | 1.74 | 365 | k__Bacteria;p__Firmicutes;c__Bacilli;o__Lactobacillales;f__Streptococcaceae;g__Lactococcus;s__Lactococcus garvieae                         |
| MLG 271 | 14 | 91552  | 15218 | 0     | 0     | 0                           | -       | 0      | 0    | 0   | Unknow                                                                                                                                     |
| MLG 272 | 14 | 89213  | 17599 | 54851 | 63.11 | gii582030173 gb C P006659.1 | 5435369 | 60113  | 1.11 | 7   | k__Bacteria;p__Proteobacteria;c__Gammaproteobacteria;o__Enterobacteriales;f__Enterobacteriaceae;g__Klebsiella;a__Klebsiella pneumoniae     |
| MLG 273 | 40 | 89102  | 9395  | 35213 | 40.59 | gii690347849 gb C P007646.1 | 1836297 | 35207  | 1.92 | 192 | k__Bacteria;p__Firmicutes;c__Bacilli;o__Lactobacillales;f__Lactobacillaceae;g__Lactobacillus;s__Lactobacillus salivarius                   |
| MLG 274 | 48 | 88834  | 13188 | 0     | 0     | 0                           | -       | 0      | 0    | 0   | Unknow                                                                                                                                     |

|         |     |       |       |       |       |                                 |             |       |      |      |                                                                                                                                                 |
|---------|-----|-------|-------|-------|-------|---------------------------------|-------------|-------|------|------|-------------------------------------------------------------------------------------------------------------------------------------------------|
| MLG 275 | 60  | 88710 | 7967  | 12810 | 14.99 | gii660567586 gb C<br>P008788.1  | 61521<br>90 | 12910 | 0.21 | 12   | k__Bacteria;p__Proteobacteria;c__Gammaproteobacteria;o__Enterobacteriales;f__Enterobacteriaceae;g__Klebsiella;s__Klebsiella oxytoca             |
| MLG 276 | 9   | 88692 | 40390 | 54326 | 64.19 | gii343179174 dbj <br>AP009332.1 | 19501<br>35 | 53542 | 2.75 | 365  | k__Bacteria;p__Firmicutes;c__Bacilli;o__Lactobacillales;f__Streptococcaceae;g__Lactococcus;s__Lactococcus garvieae                              |
| MLG 277 | 70  | 88458 | 4410  | 6387  | 7.56  | gii527122546 gb C<br>P003025.1  | 19755<br>47 | 6620  | 0.34 | 207  | k__Bacteria;p__Firmicutes;c__Bacilli;o__Lactobacillales;f__Streptococcaceae;g__Streptococcus;s__Streptococcus lutetiensis                       |
| MLG 278 | 24  | 87922 | 7255  | 42340 | 50.37 | gii400173048 gb C<br>P003737.1  | 47265<br>82 | 44601 | 0.94 | 4    | k__Bacteria;p__Proteobacteria;c__Gammaproteobacteria;o__Enterobacteriales;f__Enterobacteriaceae;g__Enterobacter;s__Enterobacter cloacae         |
| MLG 279 | 8   | 86914 | 30152 | 6769  | 8.1   | gii160361034 gb C<br>P000884.1  | 67675<br>14 | 7703  | 0.11 | 1012 | k__Bacteria;p__Proteobacteria;c__Betaproteobacteria;o__Burkholderiales;f__Comamonadaceae;g__Delftia;s__Delftia acidovorans                      |
| MLG 280 | 17  | 86750 | 36545 | 8620  | 10.33 | gii549807177 gb C<br>P006721.1  | 51078<br>14 | 10578 | 0.21 | 24   | k__Bacteria;p__Firmicutes;c__Clostridia;o__Clostridiales;f__Clostridiaceae;g__Clostridium;s__Clostridium saccharobutylicum                      |
| MLG 281 | 5   | 85925 | 43455 | 58327 | 70.72 | gii349736152 gb C<br>P003034.1  | 53135<br>31 | 63267 | 1.19 | 1    | k__Bacteria;p__Proteobacteria;c__Gammaproteobacteria;o__Enterobacteriales;f__Enterobacteriaceae;g__Escherichia;s__Escherichia coli              |
| MLG 282 | 6   | 85449 | 31819 | 47247 | 57.4  | gii148530277 gb C<br>P000705.1  | 19996<br>18 | 50168 | 2.51 | 367  | k__Bacteria;p__Firmicutes;c__Bacilli;o__Lactobacillales;f__Lactobacillaceae;g__Lactobacillus;s__Lactobacillus reuteri                           |
| MLG 283 | 43  | 84631 | 8616  | 0     | 0     | 0                               | -           | 0     | 0    | 0    | Unknow                                                                                                                                          |
| MLG 284 | 8   | 84507 | 57907 | 32494 | 40.03 | gii660567586 gb C<br>P008788.1  | 61521<br>90 | 43493 | 0.71 | 12   | k__Bacteria;p__Proteobacteria;c__Gammaproteobacteria;o__Enterobacteriales;f__Enterobacteriaceae;g__Klebsiella;s__Klebsiella oxytoca             |
| MLG 285 | 19  | 84057 | 19841 | 27574 | 34.02 | gii569535620 gb C<br>P007025.1  | 47018<br>75 | 27624 | 0.59 | 264  | k__Bacteria;p__Proteobacteria;c__Gammaproteobacteria;o__Enterobacteriales;f__Enterobacteriaceae;g__Escherichia;s__Escherichia albertii          |
| MLG 287 | 36  | 83548 | 8017  | 3836  | 4.78  | gii333109300 gb C<br>P002743.1  | 23274<br>92 | 3833  | 0.16 | 895  | k__Bacteria;p__Actinobacteria;c__Actinobacteria;o__Bifidobacteriales;f__Bifidobacteriaceae;g__Bifidobacterium;s__Bifidobacterium breve          |
| MLG 288 | 19  | 83485 | 28807 | 0     | 0     | 0                               | -           | 0     | 0    | 0    | Unknow                                                                                                                                          |
| MLG 289 | 7   | 82478 | 19302 | 0     | 0     | 0                               | -           | 0     | 0    | 0    | Unknow                                                                                                                                          |
| MLG 290 | 7   | 82307 | 29316 | 18619 | 23.37 | gii571260215 emb <br>HF571988.1 | 49401<br>99 | 18623 | 0.38 | 296  | k__Bacteria;p__Proteobacteria;c__Gammaproteobacteria;o__Enterobacteriales;f__Enterobacteriaceae;g__Yersinia;s__Yersinia enterocolitica          |
| MLG 291 | 22  | 81897 | 6455  | 44551 | 55.96 | gii671341910 gb C<br>P007443.1  | 22032<br>22 | 45850 | 2.08 | 893  | k__Bacteria;p__Actinobacteria;c__Actinobacteria;o__Bifidobacteriales;f__Bifidobacteriaceae;g__Bifidobacterium;s__Bifidobacterium adolescentis   |
| MLG 292 | 12  | 81182 | 20444 | 37111 | 46.8  | gii480474683 gb C<br>P004142.1  | 53981<br>51 | 37783 | 0.7  | 14   | k__Bacteria;p__Proteobacteria;c__Gammaproteobacteria;o__Enterobacteriales;f__Enterobacteriaceae;g__Raoultella;a__Raoultella omithinolytica      |
| MLG 293 | 7   | 81052 | 35144 | 54925 | 69.63 | gii343776783 gb C<br>P002986.1  | 45444<br>77 | 55150 | 1.21 | 444  | k__Bacteria;p__Proteobacteria;c__Gammaproteobacteria;o__Xanthomonadales;f__Xanthomonadaceae;g__Stenotrophomonas;s__Stenotrophomonas maltophilia |
| MLG 294 | 5   | 80536 | 29033 | 11590 | 14.78 | gii194405610 gb C<br>P001120.1  | 48887<br>68 | 10909 | 0.22 | 5    | k__Bacteria;p__Proteobacteria;c__Gammaproteobacteria;o__Enterobacteriales;f__Enterobacteriaceae;g__Salmonella;s__Salmonella enterica            |
| MLG 295 | 9   | 80235 | 25136 | 28395 | 36.43 | gii334279325 dbj <br>AP012053.1 | 23622<br>41 | 26829 | 1.14 | 373  | k__Bacteria;p__Firmicutes;c__Bacilli;o__Lactobacillales;f__Streptococcaceae;g__Streptococcus;s__Streptococcus gallolyticus                      |
| MLG 296 | 9   | 79901 | 36671 | 20525 | 26.34 | gii145316543 gb C<br>P000653.1  | 45187<br>12 | 20576 | 0.46 | 272  | k__Bacteria;p__Proteobacteria;c__Gammaproteobacteria;o__Enterobacteriales;f__Enterobacteriaceae;g__Enterobacter;s__Enterobacter sp. 638         |
| MLG 297 | 139 | 79762 | 1321  | 4118  | 5.37  | gii325205106 gb C<br>P002423.1  | 22504<br>49 | 4118  | 0.18 | 522  | k__Bacteria;p__Proteobacteria;c__Betaproteobacteria;o__Neisseriales;f__Neisseriaceae;g__Neisseria;s__Neisseria meningitidis                     |
| MLG 298 | 19  | 79663 | 9356  | 0     | 0     | 0                               | -           | 0     | 0    | 0    | Unknow                                                                                                                                          |
| MLG 299 | 33  | 79614 | 10021 | 18667 | 24.68 | gii595583568 gb C<br>P007265.1  | 47586<br>29 | 18978 | 0.4  | 1    | k__Bacteria;p__Proteobacteria;c__Gammaproteobacteria;o__Enterobacteriales;f__Enterobacteriaceae;g__Escherichia;s__Escherichia coli              |
| MLG 300 | 32  | 79300 | 6743  | 27029 | 35.76 | gii170517292 gb C<br>P000970.1  | 50683<br>89 | 21487 | 0.42 | 1    | k__Bacteria;p__Proteobacteria;c__Gammaproteobacteria;o__Enterobacteriales;f__Enterobacteriaceae;g__Escherichia;s__Escherichia coli              |
| MLG 301 | 48  | 78886 | 4595  | 70617 | 93.98 | gii116098028 gb C<br>P000416.1  | 22912<br>20 | 71541 | 3.12 | 400  | k__Bacteria;p__Firmicutes;c__Bacilli;o__Lactobacillales;f__Lactobacillaceae;g__Lactobacillus;s__Lactobacillus brevis                            |
| MLG 303 | 9   | 78415 | 24006 | 8772  | 11.73 | gii308746527 gb C<br>P002272.1  | 48140<br>49 | 14421 | 0.3  | 8    | k__Bacteria;p__Proteobacteria;c__Gammaproteobacteria;o__Enterobacteriales;f__Enterobacteriaceae;g__Enterobacter;s__Enterobacter lignolyticus    |

|         |    |       |       |       |       |                             |         |       |      |     |                                                                                                                                                               |
|---------|----|-------|-------|-------|-------|-----------------------------|---------|-------|------|-----|---------------------------------------------------------------------------------------------------------------------------------------------------------------|
| MLG 304 | 9  | 77948 | 24148 | 8812  | 11.81 | gii343179174 dbj AP009332.1 | 1950135 | 8831  | 0.45 | 365 | k__Bacteria;p__Firmicutes;c__Bacilli;o__Lactobacillales;f__Streptococcaceae;g__Lactococcus;s__Lactococcus garvieae                                            |
| MLG 305 | 10 | 77912 | 18025 | 13345 | 17.9  | gii288730948 emb FN597254.1 | 2350911 | 13554 | 0.58 | 373 | k__Bacteria;p__Firmicutes;c__Bacilli;o__Lactobacillales;f__Streptococcaceae;g__Streptococcus;s__Streptococcus galloyticus                                     |
| MLG 306 | 5  | 76734 | 30576 | 14497 | 19.5  | gii334281572 dbj AP012054.1 | 2100077 | 15230 | 0.73 | 368 | k__Bacteria;p__Firmicutes;c__Bacilli;o__Lactobacillales;f__Streptococcaceae;g__Streptococcus;s__Streptococcus pasteurianus                                    |
| MLG 307 | 5  | 75713 | 29830 | 24032 | 32.5  | gii662712225 gb C P008823.1 | 4852980 | 24022 | 0.49 | 4   | k__Bacteria;p__Proteobacteria;c__Gammaproteobacteria;o__Enterobacteriales;f__Enterobacteriaceae;g__Enterobacter;s__Enterobacter cloacae                       |
| MLG 308 | 5  | 75651 | 27775 | 60389 | 81.77 | gii392322800 gb C P003678.1 | 4968248 | 64483 | 1.3  | 4   | k__Bacteria;p__Proteobacteria;c__Gammaproteobacteria;o__Enterobacteriales;f__Enterobacteriaceae;g__Enterobacter;s__Enterobacter cloacae                       |
| MLG 309 | 31 | 75580 | 10302 | 9287  | 12.58 | gii374681091 gb C P003295.1 | 1988420 | 9284  | 0.47 | 228 | k__Bacteria;p__Firmicutes;c__Bacilli;o__Lactobacillales;f__Streptococcaceae;g__Streptococcus;s__Streptococcus infantarius                                     |
| MLG 310 | 19 | 75143 | 6893  | 51994 | 70.5  | gii682108593 gb C P008897.1 | 4633407 | 54190 | 1.17 | 4   | k__Bacteria;p__Proteobacteria;c__Gammaproteobacteria;o__Enterobacteriales;f__Enterobacteriaceae;g__Enterobacter;s__Enterobacter cloacae                       |
| MLG 311 | 39 | 75094 | 6134  | 14605 | 19.86 | gii603299224 gb C P007421.1 | 4760449 | 14868 | 0.31 | 5   | k__Bacteria;p__Proteobacteria;c__Gammaproteobacteria;o__Enterobacteriales;f__Enterobacteriaceae;g__Salmonella;s__Salmonella enterica                          |
| MLG 312 | 4  | 74767 | 31727 | 56888 | 78.11 | gii157320013 gb C P000826.1 | 5448853 | 57612 | 1.06 | 282 | k__Bacteria;p__Proteobacteria;c__Gammaproteobacteria;o__Enterobacteriales;f__Enterobacteriaceae;g__Serratia;s__Serratia proteamaculans                        |
| MLG 313 | 44 | 74605 | 9803  | 41433 | 56.95 | gii440050501 gb C P003942.1 | 4858216 | 41692 | 0.86 | 16  | k__Bacteria;p__Proteobacteria;c__Gammaproteobacteria;o__Enterobacteriales;f__Enterobacteriaceae;g__Serratia;s__Serratia marcescens                            |
| MLG 314 | 16 | 74542 | 20208 | 24706 | 34.33 | gii647802220 gb C P008696.1 | 7122173 | 26459 | 0.37 | 325 | k__Bacteria;p__Proteobacteria;c__Gammaproteobacteria;o__Pseudomonadales;f__Pseudomonadaceae;g__Pseudomonas;s__Pseudomonas chlororaphis                        |
| MLG 315 | 22 | 74359 | 17682 | 25276 | 35.33 | gii527122546 gb C P003025.1 | 1975547 | 23831 | 1.21 | 207 | k__Bacteria;p__Firmicutes;c__Bacilli;o__Lactobacillales;f__Streptococcaceae;g__Streptococcus;s__Streptococcus lutetiensis                                     |
| MLG 316 | 23 | 73941 | 14161 | 46562 | 65.5  | gii647802220 gb C P008696.1 | 7122173 | 43744 | 0.61 | 325 | k__Bacteria;p__Proteobacteria;c__Gammaproteobacteria;o__Pseudomonadales;f__Pseudomonadaceae;g__Pseudomonas;s__Pseudomonas chlororaphis                        |
| MLG 317 | 9  | 73855 | 26093 | 5871  | 8.31  | gii673531252 emb LK931336.1 | 4763704 | 5873  | 0.12 | 6   | k__Bacteria;p__Proteobacteria;c__Gammaproteobacteria;o__Enterobacteriales;f__Enterobacteriaceae;g__Citrobacter;s__Citrobacter koseri                          |
| MLG 318 | 12 | 73819 | 29348 | 10343 | 14.68 | gii612150118 gb C P007546.1 | 4561905 | 10339 | 0.23 | 9   | k__Bacteria;p__Proteobacteria;c__Gammaproteobacteria;o__Enterobacteriales;f__Enterobacteriaceae;g__Enterobacter;s__Enterobacter asburiae                      |
| MLG 319 | 64 | 73751 | 4350  | 0     | 0     | 0                           | -       | 0     | 0    | 0   | Unknow                                                                                                                                                        |
| MLG 320 | 6  | 73557 | 47262 | 989   | 1.41  | gii401794054 gb C P003747.1 | 5083176 | 1569  | 0.03 | 104 | k__Bacteria;p__Firmicutes;c__Bacilli;o__Bacillales;f__Bacillaceae;g__Bacillus;s__Bacillus cereus                                                              |
| MLG 322 | 23 | 72831 | 6578  | 56742 | 82.06 | gii443419838 gb C P004009.1 | 4798435 | 57538 | 1.2  | 1   | k__Bacteria;p__Proteobacteria;c__Gammaproteobacteria;o__Enterobacteriales;f__Enterobacteriaceae;g__Escherichia;s__Escherichia coli                            |
| MLG 323 | 8  | 72757 | 24945 | 45203 | 65.44 | gii660567586 gb C P008788.1 | 6152190 | 47673 | 0.77 | 12  | k__Bacteria;p__Proteobacteria;c__Gammaproteobacteria;o__Enterobacteriales;f__Enterobacteriaceae;g__Klebsiella;s__Klebsiella oxytoca                           |
| MLG 324 | 76 | 71964 | 4766  | 61324 | 89.27 | gii455418716 gb C P004345.1 | 3799539 | 68146 | 1.79 | 301 | k__Bacteria;p__Proteobacteria;c__Gammaproteobacteria;o__Enterobacteriales;f__Enterobacteriaceae;g__Morganella;s__Morganella morganii                          |
| MLG 325 | 23 | 71538 | 17240 | 59349 | 87.16 | gii339759707 gb C P002910.1 | 5259571 | 59415 | 1.13 | 7   | k__Bacteria;p__Proteobacteria;c__Gammaproteobacteria;o__Enterobacteriales;f__Enterobacteriaceae;g__Klebsiella;s__Klebsiella pneumoniae                        |
| MLG 326 | 42 | 71083 | 7634  | 50680 | 75.27 | gii145316543 gb C P000653.1 | 4518712 | 53244 | 1.18 | 272 | k__Bacteria;p__Proteobacteria;c__Gammaproteobacteria;o__Enterobacteriales;f__Enterobacteriaceae;g__Enterobacter;s__Enterobacter sp. 638                       |
| MLG 327 | 7  | 70624 | 22962 | 15082 | 22.68 | gii480474683 gb C P004142.1 | 5398151 | 15368 | 0.28 | 14  | k__Bacteria;p__Proteobacteria;c__Gammaproteobacteria;o__Enterobacteriales;f__Enterobacteriaceae;g__Raoultella;s__Raoultella omithinolytica                    |
| MLG 328 | 5  | 70454 | 34121 | 0     | 0     | 0                           | -       | 0     | 0    | 0   | Unknow                                                                                                                                                        |
| MLG 329 | 11 | 70381 | 26829 | 53685 | 81.81 | gii440045023 gb C P003938.1 | 4762179 | 56646 | 1.19 | 3   | k__Bacteria;p__Proteobacteria;c__Gammaproteobacteria;o__Enterobacteriales;f__Enterobacteriaceae;g__Unclassified;s__Enterobacteriaceae bacterium strain FGI 57 |
| MLG 330 | 55 | 70276 | 8639  | 63007 | 96.12 | gii526120653 gb C P006603.1 | 2145445 | 71476 | 3.33 | 367 | k__Bacteria;p__Firmicutes;c__Bacilli;o__Lactobacillales;f__Lactobacillaceae;g__Lactobacillus;s__Lactobacillus reuteri                                         |
| MLG 331 | 24 | 70086 | 14501 | 15675 | 24.02 | gii619734722 gb C P007557.1 | 5099034 | 15676 | 0.31 | 267 | k__Bacteria;p__Proteobacteria;c__Gammaproteobacteria;o__Enterobacteriales;f__Enterobacteriaceae;g__Citrobacter;s__Citrobacter freundii                        |

|         |    |       |       |       |       |                              |          |       |      |     |                                                                                                                                         |
|---------|----|-------|-------|-------|-------|------------------------------|----------|-------|------|-----|-----------------------------------------------------------------------------------------------------------------------------------------|
| MLG 332 | 10 | 69143 | 20149 | 2368  | 3.64  | gii374681091 gb C P003295.1  | 19884 20 | 2880  | 0.14 | 228 | k__Bacteria;p__Firmicutes;c__Bacilli;o__Lactobacillales;f__Streptococcaceae;g__Streptococcus;s__Streptococcus infantarius               |
| MLG 333 | 12 | 69075 | 53342 | 33696 | 51.83 | gii448273020 gb C P004082.1  | 32039 64 | 31192 | 0.97 | 385 | k__Bacteria;p__Firmicutes;c__Bacilli;o__Lactobacillales;f__Lactobacillaceae;g__Lactobacillus;s__Lactobacillus plantarum                 |
| MLG 335 | 18 | 68697 | 8354  | 21448 | 33.05 | gii619734722 gb C P007557.1  | 50990 34 | 22257 | 0.44 | 267 | k__Bacteria;p__Proteobacteria;c__Gammaproteobacteria;o__Enterobacteriales;f__Enterobacteriaceae;g__Citrobacter;s__Citrobacter freundii  |
| MLG 336 | 6  | 68094 | 21564 | 64583 | 99.94 | gii500236135 gb C P005958.1  | 20646 20 | 75685 | 3.67 | 414 | k__Bacteria;p__Firmicutes;c__Bacilli;o__Lactobacillales;f__Lactobacillaceae;g__Lactobacillus;s__Lactobacillus fermentum                 |
| MLG 337 | 21 | 67335 | 14127 | 63644 | 98.78 | gii569535620 gb C P007025.1  | 47018 75 | 64913 | 1.38 | 264 | k__Bacteria;p__Proteobacteria;c__Gammaproteobacteria;o__Enterobacteriales;f__Enterobacteriaceae;g__Escherichia;s__Escherichia albertii  |
| MLG 338 | 9  | 66508 | 14974 | 25255 | 39.29 | gii326539903 gb C P002582.1  | 47142 37 | 28329 | 0.6  | 51  | k__Bacteria;p__Firmicutes;c__Clostridia;o__Clostridiales;f__Lachnospiraceae;g__Cellulosilyticum;s__Cellulosilyticum lentocellum         |
| MLG 339 | 81 | 66472 | 4337  | 44660 | 69.48 | gii148530277 gb C P000705.1  | 19996 18 | 48616 | 2.43 | 367 | k__Bacteria;p__Firmicutes;c__Bacilli;o__Lactobacillales;f__Lactobacillaceae;g__Lactobacillus;s__Lactobacillus reuteri                   |
| MLG 340 | 10 | 65619 | 14313 | 14832 | 23.1  | gii218430358 emb C U928163.2 | 52020 90 | 14814 | 0.28 | 1   | k__Bacteria;p__Proteobacteria;c__Gammaproteobacteria;o__Enterobacteriales;f__Enterobacteriaceae;g__Escherichia;s__Escherichia coli      |
| MLG 341 | 12 | 65551 | 31705 | 7600  | 11.84 | gii187427012 gb C P001063.1  | 46159 97 | 8099  | 0.18 | 263 | k__Bacteria;p__Proteobacteria;c__Gammaproteobacteria;o__Enterobacteriales;f__Enterobacteriaceae;g__Shigella;s__Shigella boydii          |
| MLG 343 | 14 | 65253 | 12689 | 14846 | 23.27 | gii116100249 gb C P000419.1  | 18563 68 | 20775 | 1.12 | 379 | k__Bacteria;p__Firmicutes;c__Bacilli;o__Lactobacillales;f__Streptococcaceae;g__Streptococcus;s__Streptococcus thermophilus              |
| MLG 344 | 4  | 65128 | 35773 | 62017 | 97.96 | gii374269796 emb HE616528.1  | 49885 04 | 78353 | 1.57 | 262 | k__Bacteria;p__Proteobacteria;c__Gammaproteobacteria;o__Enterobacteriales;f__Enterobacteriaceae;g__Shigella;s__Shigella sonnei          |
| MLG 345 | 9  | 65009 | 36210 | 1767  | 2.81  | gii329124738 gb C P002410.1  | 27731 57 | 1767  | 0.06 | 20  | k__Bacteria;p__Firmicutes;c__Clostridia;o__Clostridiales;f__Clostridiaceae;g__Clostridium;s__Clostridium botulinum                      |
| MLG 346 | 16 | 64988 | 16437 | 0     | 0     | 0                            | -        | 0     | 0    | 0   | Unknow                                                                                                                                  |
| MLG 347 | 13 | 64888 | 11154 | 15643 | 24.99 | gii564116047 gb C P006731.1  | 43775 44 | 16922 | 0.39 | 271 | k__Bacteria;p__Proteobacteria;c__Gammaproteobacteria;o__Enterobacteriales;f__Enterobacteriaceae;g__Cronobacter;s__Cronobacter sakazakii |
| MLG 348 | 15 | 64625 | 7524  | 60582 | 96.98 | gii349736152 gb C P003034.1  | 53135 31 | 51622 | 0.97 | 1   | k__Bacteria;p__Proteobacteria;c__Gammaproteobacteria;o__Enterobacteriales;f__Enterobacteriaceae;g__Escherichia;s__Escherichia coli      |
| MLG 349 | 10 | 64430 | 16082 | 51384 | 82.41 | gii392322800 gb C P003678.1  | 49682 48 | 54669 | 1.1  | 4   | k__Bacteria;p__Proteobacteria;c__Gammaproteobacteria;o__Enterobacteriales;f__Enterobacteriaceae;g__Enterobacter;s__Enterobacter cloacae |
| MLG 350 | 49 | 64283 | 5850  | 29463 | 47.3  | gii110341805 gb C P000247.1  | 49389 20 | 32175 | 0.65 | 1   | k__Bacteria;p__Proteobacteria;c__Gammaproteobacteria;o__Enterobacteriales;f__Enterobacteriaceae;g__Escherichia;s__Escherichia coli      |
| MLG 351 | 8  | 64281 | 22034 | 47755 | 76.82 | gii595583568 gb C P007265.1  | 47586 29 | 60849 | 1.28 | 1   | k__Bacteria;p__Proteobacteria;c__Gammaproteobacteria;o__Enterobacteriales;f__Enterobacteriaceae;g__Escherichia;s__Escherichia coli      |
| MLG 352 | 11 | 64208 | 16965 | 36187 | 58.63 | gii365906294 gb C P003218.1  | 59741 09 | 35894 | 0.6  | 12  | k__Bacteria;p__Proteobacteria;c__Gammaproteobacteria;o__Enterobacteriales;f__Enterobacteriaceae;g__Klebsiella;a__Klebsiella oxytoca     |
| MLG 353 | 8  | 64165 | 13849 | 24445 | 39.61 | gii582035815 gb C P004081.1  | 29610 43 | 28298 | 0.96 | 72  | k__Bacteria;p__Firmicutes;c__Bacilli;o__Lactobacillales;f__Enterococcaceae;g__Enterococcus;s__Enterococcus faecalis                     |
| MLG 354 | 7  | 64054 | 35908 | 11780 | 19.12 | gii218368405 emb C U928164.2 | 51320 68 | 11779 | 0.23 | 1   | k__Bacteria;p__Proteobacteria;c__Gammaproteobacteria;o__Enterobacteriales;f__Enterobacteriaceae;g__Escherichia;s__Escherichia coli      |
| MLG 355 | 27 | 63809 | 22189 | 26498 | 43.65 | gii329127738 gb C P002652.1  | 25063 01 | 29441 | 1.17 | 395 | k__Bacteria;p__Firmicutes;c__Bacilli;o__Lactobacillales;f__Lactobacillaceae;g__Lactobacillus;s__Lactobacillus buchneri                  |
| MLG 356 | 13 | 63309 | 10167 | 17133 | 28.28 | gii392322800 gb C P003678.1  | 49682 48 | 18071 | 0.36 | 4   | k__Bacteria;p__Proteobacteria;c__Gammaproteobacteria;o__Enterobacteriales;f__Enterobacteriaceae;g__Enterobacter;s__Enterobacter cloacae |
| MLG 357 | 59 | 62951 | 4846  | 22584 | 37.74 | gii560171871 emb HG326223.1  | 51138 02 | 22911 | 0.45 | 16  | k__Bacteria;p__Proteobacteria;c__Gammaproteobacteria;o__Enterobacteriales;f__Enterobacteriaceae;g__Serratia;s__Serratia marcescens      |
| MLG 358 | 4  | 62877 | 33066 | 2550  | 4.32  | gii451782877 gb C P004121.1  | 65302 57 | 2602  | 0.04 | 35  | k__Bacteria;p__Firmicutes;c__Clostridia;o__Clostridiales;f__Clostridiaceae;g__Clostridium;s__Clostridium saccharoperbutylacetonicum     |
| MLG 359 | 4  | 62596 | 21029 | 54289 | 92.24 | gii41584196 gb AE 017198.1   | 19926 76 | 55513 | 2.79 | 193 | k__Bacteria;p__Firmicutes;c__Bacilli;o__Lactobacillales;f__Lactobacillaceae;g__Lactobacillus;s__Lactobacillus johnsonii                 |
| MLG 361 | 9  | 62466 | 14720 | 58223 | 99.5  | gii308044682 gb C P002222.1  | 32543 76 | 58289 | 1.79 | 385 | k__Bacteria;p__Firmicutes;c__Bacilli;o__Lactobacillales;f__Lactobacillaceae;g__Lactobacillus;s__Lactobacillus plantarum                 |

|         |    |       |       |       |       |                             |         |       |      |     |                                                                                                                                              |
|---------|----|-------|-------|-------|-------|-----------------------------|---------|-------|------|-----|----------------------------------------------------------------------------------------------------------------------------------------------|
| MLG 362 | 4  | 62353 | 41278 | 1717  | 2.95  | gi 647802220 gb C_P008696.1 | 7122173 | 1717  | 0.02 | 325 | k__Bacteria;p__Proteobacteria;c__Gammaproteobacteria;o__Pseudomonadales;f__Pseudomonadales;g__Pseudomonas;s__Pseudomonas chlororaphis        |
| MLG 363 | 12 | 62284 | 11205 | 44465 | 76.45 | gi 325663854 gb C_P002246.1 | 4552107 | 49217 | 1.08 | 296 | k__Bacteria;p__Proteobacteria;c__Gammaproteobacteria;o__Enterobacteriales;f__Enterobacteriaceae;g__Yersinia;s__Yersinia enterocolitica       |
| MLG 364 | 3  | 62168 | 23151 | 3487  | 6     | gi 595583568 gb C_P007265.1 | 4758629 | 3487  | 0.07 | 1   | k__Bacteria;p__Proteobacteria;c__Gammaproteobacteria;o__Enterobacteriales;f__Enterobacteriaceae;g__Escherichia;s__Escherichia coli           |
| MLG 365 | 32 | 61725 | 8705  | 1223  | 2.11  | gi 187720473 gb C_P001056.1 | 3800327 | 1223  | 0.03 | 20  | k__Bacteria;p__Firmicutes;c__Clostridia;o__Clostridiales;f__Clostridiaceae;g__Clostridium;s__Clostridium botulinum                           |
| MLG 366 | 18 | 61719 | 27334 | 4887  | 8.45  | gi 218354981 emb CU928158.2 | 4588711 | 4925  | 0.11 | 2   | k__Bacteria;p__Proteobacteria;c__Gammaproteobacteria;o__Enterobacteriales;f__Enterobacteriaceae;g__Escherichia;s__Escherichia fergusonii     |
| MLG 367 | 18 | 61611 | 11780 | 1793  | 3.1   | gi 189427298 gb C_P000605.1 | 2375792 | 2668  | 0.11 | 890 | k__Bacteria;p__Actinobacteria;c__Actinobacteria;o__Bifidobacteriales;f__Bifidobacteriaceae;g__Bifidobacterium;s__Bifidobacterium longum      |
| MLG 368 | 14 | 60707 | 12971 | 3060  | 5.31  | gi 122087364 emb AM286415.1 | 4615899 | 3039  | 0.07 | 296 | k__Bacteria;p__Proteobacteria;c__Gammaproteobacteria;o__Enterobacteriales;f__Enterobacteriaceae;g__Yersinia;s__Yersinia enterocolitica       |
| MLG 369 | 12 | 60584 | 17782 | 1990  | 3.48  | gi 549807177 gb C_P006721.1 | 5107814 | 3245  | 0.06 | 24  | k__Bacteria;p__Firmicutes;c__Clostridia;o__Clostridiales;f__Clostridiaceae;g__Clostridium;s__Clostridium saccharobutylicum                   |
| MLG 370 | 16 | 59839 | 7989  | 55481 | 97.63 | gi 312944605 gb C_P001855.1 | 4747819 | 55697 | 1.17 | 1   | k__Bacteria;p__Proteobacteria;c__Gammaproteobacteria;o__Enterobacteriales;f__Enterobacteriaceae;g__Escherichia;s__Escherichia coli           |
| MLG 371 | 44 | 59039 | 6819  | 8562  | 15.1  | gi 348600280 dbj AP012046.1 | 2562720 | 8568  | 0.33 | 209 | k__Bacteria;p__Firmicutes;c__Bacilli;o__Lactobacillales;f__Enterococcaceae;g__Tetragenococcus;s__Tetragenococcus halophilus                  |
| MLG 372 | 10 | 58857 | 25103 | 44751 | 79.65 | gi 443419838 gb C_P004009.1 | 4798435 | 44744 | 0.93 | 1   | k__Bacteria;p__Proteobacteria;c__Gammaproteobacteria;o__Enterobacteriales;f__Enterobacteriaceae;g__Escherichia;s__Escherichia coli           |
| MLG 375 | 15 | 58517 | 13961 | 7427  | 13.34 | gi 334279325 dbj AP012053.1 | 2362241 | 7428  | 0.31 | 373 | k__Bacteria;p__Firmicutes;c__Bacilli;o__Lactobacillales;f__Streptococcaceae;g__Streptococcus;s__Streptococcus gallolyticus                   |
| MLG 376 | 7  | 58513 | 11712 | 27501 | 49.39 | gi 571260215 emb HF571988.1 | 4940199 | 27539 | 0.56 | 296 | k__Bacteria;p__Proteobacteria;c__Gammaproteobacteria;o__Enterobacteriales;f__Enterobacteriaceae;g__Yersinia;s__Yersinia enterocolitica       |
| MLG 377 | 7  | 58295 | 32622 | 54837 | 98.6  | gi 689262542 gb C_P009451.1 | 4876437 | 57329 | 1.18 | 19  | k__Bacteria;p__Proteobacteria;c__Gammaproteobacteria;o__Enterobacteriales;f__Enterobacteriaceae;g__Cedecea;s__Cedecea neteri                 |
| MLG 378 | 15 | 58165 | 9535  | 26134 | 47.31 | gi 121504137 gb C_P000538.1 | 1616554 | 28170 | 1.74 | 98  | k__Bacteria;p__Proteobacteria;c__Epsilonproteobacteria;o__Campylobacteriales;f__Campylobacteriaceae;g__Campylobacter;s__Campylobacter jejuni |
| MLG 379 | 10 | 58163 | 25353 | 6327  | 11.47 | gi 157081501 gb C_P000822.1 | 4720462 | 6326  | 0.13 | 6   | k__Bacteria;p__Proteobacteria;c__Gammaproteobacteria;o__Enterobacteriales;f__Enterobacteriaceae;g__Citrobacter;s__Citrobacter koseri         |
| MLG 380 | 58 | 57973 | 7214  | 0     | 0     | 0                           | -       | 0     | 0    | 0   | Unknow                                                                                                                                       |
| MLG 381 | 4  | 57849 | 29656 | 2401  | 4.36  | gi 187720473 gb C_P001056.1 | 3800327 | 2401  | 0.06 | 20  | k__Bacteria;p__Firmicutes;c__Clostridia;o__Clostridiales;f__Clostridiaceae;g__Clostridium;s__Clostridium botulinum                           |
| MLG 382 | 5  | 57759 | 33580 | 1862  | 3.4   | gi 187720473 gb C_P001056.1 | 3800327 | 1862  | 0.05 | 20  | k__Bacteria;p__Firmicutes;c__Clostridia;o__Clostridiales;f__Clostridiaceae;g__Clostridium;s__Clostridium botulinum                           |
| MLG 383 | 18 | 57586 | 10702 | 19654 | 36.54 | gi 695936535 gb C_P009578.1 | 4874804 | 19654 | 0.4  | 1   | k__Bacteria;p__Proteobacteria;c__Gammaproteobacteria;o__Enterobacteriales;f__Enterobacteriaceae;g__Escherichia;s__Escherichia coli           |
| MLG 384 | 38 | 57252 | 10545 | 24482 | 45.83 | gi 206564770 gb C_P000964.1 | 5641239 | 24718 | 0.44 | 7   | k__Bacteria;p__Proteobacteria;c__Gammaproteobacteria;o__Enterobacteriales;f__Enterobacteriaceae;g__Klebsiella;a__Klebsiella pneumoniae       |
| MLG 385 | 5  | 56830 | 16522 | 52298 | 98.46 | gi 218354981 emb CU928158.2 | 4588711 | 26587 | 0.58 | 2   | k__Bacteria;p__Proteobacteria;c__Gammaproteobacteria;o__Enterobacteriales;f__Enterobacteriaceae;g__Escherichia;s__Escherichia fergusonii     |
| MLG 386 | 12 | 56690 | 39897 | 8108  | 15.34 | gi 283101593 gb C_P001750.1 | 2636367 | 8116  | 0.31 | 909 | k__Bacteria;p__Actinobacteria;c__Actinobacteria;o__Bifidobacteriales;f__Bifidobacteriaceae;g__Bifidobacterium;s__Bifidobacterium dentium     |
| MLG 387 | 7  | 56188 | 25203 | 48854 | 92.61 | gi 110341805 gb C_P000247.1 | 4938920 | 59949 | 1.21 | 1   | k__Bacteria;p__Proteobacteria;c__Gammaproteobacteria;o__Enterobacteriales;f__Enterobacteriaceae;g__Escherichia;s__Escherichia coli           |
| MLG 388 | 69 | 56101 | 3629  | 49314 | 93.71 | gi 582030173 gb C_P006659.1 | 5435369 | 52085 | 0.96 | 7   | k__Bacteria;p__Proteobacteria;c__Gammaproteobacteria;o__Enterobacteriales;f__Enterobacteriaceae;g__Klebsiella;a__Klebsiella pneumoniae       |
| MLG 389 | 8  | 55865 | 23183 | 22516 | 43.05 | gi 689257448 gb C_P009450.1 | 5489680 | 23470 | 0.43 | 11  | k__Bacteria;p__Proteobacteria;c__Gammaproteobacteria;o__Enterobacteriales;f__Enterobacteriaceae;g__Pluralibacter;s__Pluralibacter gergoviae  |
| MLG 390 | 4  | 55694 | 33520 | 2398  | 4.59  | gi 291482099 emb FN665652.1 | 4159517 | 1629  | 0.04 | 22  | k__Bacteria;p__Firmicutes;c__Clostridia;o__Clostridiales;f__Peptostreptococcaceae;g__Peptoclostridium;s__Peptoclostridium difficile          |

|         |    |       |       |       |       |                             |         |       |      |     |                                                                                                                                                               |
|---------|----|-------|-------|-------|-------|-----------------------------|---------|-------|------|-----|---------------------------------------------------------------------------------------------------------------------------------------------------------------|
| MLG 391 | 35 | 55681 | 8397  | 17679 | 33.86 | gii215263233 emb FM180568.1 | 4965553 | 17690 | 0.36 | 1   | k__Bacteria;p__Proteobacteria;c__Gammaproteobacteria;o__Enterobacteriales;f__Enterobacteriaceae;g__Escherichia;s__Escherichia coli                            |
| MLG 392 | 12 | 55616 | 11292 | 14824 | 28.47 | gii334279325 dbj AP012053.1 | 2362241 | 14763 | 0.62 | 373 | k__Bacteria;p__Firmicutes;c__Bacilli;o__Lactobacillales;f__Streptococcaceae;g__Streptococcus;s__Streptococcus gallolyticus                                    |
| MLG 393 | 21 | 55240 | 10449 | 50683 | 97.51 | gii334732565 gb C P002824.1 | 5280350 | 53712 | 1.02 | 15  | k__Bacteria;p__Proteobacteria;c__Gammaproteobacteria;o__Enterobacteriales;f__Enterobacteriaceae;g__Enterobacter;s__Enterobacter aerogenes                     |
| MLG 394 | 20 | 55176 | 7239  | 11486 | 22.23 | gii619734722 gb C P007557.1 | 5099034 | 11487 | 0.23 | 267 | k__Bacteria;p__Proteobacteria;c__Gammaproteobacteria;o__Enterobacteriales;f__Enterobacteriaceae;g__Citrobacter;s__Citrobacter freundii                        |
| MLG 395 | 3  | 55138 | 30780 | 5619  | 10.96 | gii400173048 gb C P003737.1 | 4726582 | 5618  | 0.12 | 4   | k__Bacteria;p__Proteobacteria;c__Gammaproteobacteria;o__Enterobacteriales;f__Enterobacteriaceae;g__Enterobacter;s__Enterobacter cloacae                       |
| MLG 396 | 47 | 55114 | 5813  | 40575 | 79.42 | gii573932891 gb C P006262.1 | 5402276 | 41061 | 0.76 | 1   | k__Bacteria;p__Proteobacteria;c__Gammaproteobacteria;o__Enterobacteriales;f__Enterobacteriaceae;g__Escherichia;s__Escherichia coli                            |
| MLG 397 | 29 | 54767 | 7387  | 44950 | 88.26 | gii29350190 gb AE 016830.1  | 3218031 | 49926 | 1.55 | 72  | k__Bacteria;p__Firmicutes;c__Bacilli;o__Lactobacillales;f__Enterococcaceae;g__Enterococcus;s__Enterococcus faecalis                                           |
| MLG 398 | 5  | 53783 | 23410 | 0     | 0     | 0                           | -       | 0     | 0    | 0   | Unknow                                                                                                                                                        |
| MLG 399 | 12 | 53419 | 7726  | 3647  | 7.19  | gii499527875 emb FO203501.1 | 5270770 | 2542  | 0.05 | 7   | k__Bacteria;p__Proteobacteria;c__Gammaproteobacteria;o__Enterobacteriales;f__Enterobacteriaceae;g__Klebsiella;s__Klebsiella pneumoniae                        |
| MLG 400 | 5  | 53117 | 21508 | 0     | 0     | 0                           | -       | 0     | 0    | 0   | Unknow                                                                                                                                                        |
| MLG 401 | 9  | 52844 | 20464 | 5172  | 10.33 | gii675818151 emb LK999983.1 | 1893946 | 5172  | 0.27 | 1   | k__Bacteria;p__Proteobacteria;c__Gammaproteobacteria;o__Enterobacteriales;f__Enterobacteriaceae;g__Escherichia;s__Escherichia coli                            |
| MLG 402 | 5  | 52751 | 29430 | 24157 | 49.27 | gii662712225 gb C P008823.1 | 4852980 | 26054 | 0.54 | 4   | k__Bacteria;p__Proteobacteria;c__Gammaproteobacteria;o__Enterobacteriales;f__Enterobacteriaceae;g__Enterobacter;s__Enterobacter cloacae                       |
| MLG 404 | 3  | 52624 | 28568 | 23108 | 47.48 | gii47232670 dbj AP012167.1  | 2395134 | 23812 | 0.99 | 400 | k__Bacteria;p__Firmicutes;c__Bacilli;o__Lactobacillales;f__Lactobacillaceae;g__Lactobacillus;s__Lactobacillus brevis                                          |
| MLG 405 | 10 | 52302 | 31579 | 16033 | 33.02 | gii695172424 gb C P008929.1 | 5317001 | 18388 | 0.35 | 7   | k__Bacteria;p__Proteobacteria;c__Gammaproteobacteria;o__Enterobacteriales;f__Enterobacteriaceae;g__Klebsiella;s__Klebsiella pneumoniae                        |
| MLG 406 | 22 | 52237 | 22087 | 1248  | 2.59  | gii485080253 gb C P002099.1 | 4791958 | 1243  | 0.03 | 5   | k__Bacteria;p__Proteobacteria;c__Gammaproteobacteria;o__Enterobacteriales;f__Enterobacteriaceae;g__Salmonella;s__Salmonella enterica                          |
| MLG 407 | 13 | 52209 | 11412 | 46818 | 97.57 | gii125496804 gb C P000387.1 | 2388435 | 47016 | 1.97 | 409 | k__Bacteria;p__Firmicutes;c__Bacilli;o__Lactobacillales;f__Streptococcaceae;g__Streptococcus;s__Streptococcus sanguinis                                       |
| MLG 409 | 7  | 52063 | 24820 | 42809 | 89.84 | gii269093698 gb C P001820.1 | 2132142 | 52515 | 2.46 | 91  | k__Bacteria;p__Firmicutes;c__Negativicutes;o__Selenomonadales;f__Veillonellaceae;g__Veillonella;s__Veillonella parvula                                        |
| MLG 410 | 9  | 51976 | 10326 | 43173 | 91.18 | gii218354981 emb CU928158.2 | 4588711 | 39947 | 0.87 | 2   | k__Bacteria;p__Proteobacteria;c__Gammaproteobacteria;o__Enterobacteriales;f__Enterobacteriaceae;g__Escherichia;s__Escherichia fergusonii                      |
| MLG 411 | 4  | 51678 | 16255 | 34481 | 72.93 | gii440045023 gb C P003938.1 | 4762179 | 35545 | 0.75 | 3   | k__Bacteria;p__Proteobacteria;c__Gammaproteobacteria;o__Enterobacteriales;f__Enterobacteriaceae;g__Unclassified;s__Enterobacteriaceae bacterium strain FGI 57 |
| MLG 412 | 5  | 51286 | 21454 | 46678 | 99.59 | gii334732565 gb C P002824.1 | 5280350 | 53162 | 1.01 | 15  | k__Bacteria;p__Proteobacteria;c__Gammaproteobacteria;o__Enterobacteriales;f__Enterobacteriaceae;g__Enterobacter;s__Enterobacter aerogenes                     |
| MLG 413 | 5  | 51087 | 22876 | 46738 | 99.86 | gii365906294 gb C P003218.1 | 5974109 | 54834 | 0.92 | 12  | k__Bacteria;p__Proteobacteria;c__Gammaproteobacteria;o__Enterobacteriales;f__Enterobacteriaceae;g__Klebsiella;s__Klebsiella oxytoca                           |
| MLG 414 | 23 | 50930 | 5606  | 3280  | 7.02  | gii295107714 emb FP929054.1 | 3757491 | 3434  | 0.09 | 721 | k__Bacteria;p__Firmicutes;c__Clostridia;o__Clostridiales;f__Lachnospiraceae;g__Blautia;s__[Ruminococcus] obeum                                                |
| MLG 415 | 14 | 50780 | 10097 | 39189 | 84.05 | gii145316543 gb C P000653.1 | 4518712 | 36355 | 0.8  | 272 | k__Bacteria;p__Proteobacteria;c__Gammaproteobacteria;o__Enterobacteriales;f__Enterobacteriaceae;g__Enterobacter;s__Enterobacter sp. 638                       |
| MLG 416 | 10 | 50752 | 11205 | 22677 | 48.7  | gii397335222 gb C P003726.1 | 2987450 | 25202 | 0.84 | 72  | k__Bacteria;p__Firmicutes;c__Bacilli;o__Lactobacillales;f__Enterococcaceae;g__Enterococcus;s__Enterococcus faecalis                                           |
| MLG 418 | 4  | 50200 | 18313 | 36603 | 78.91 | gii662712225 gb C P008823.1 | 4852980 | 35904 | 0.74 | 4   | k__Bacteria;p__Proteobacteria;c__Gammaproteobacteria;o__Enterobacteriales;f__Enterobacteriaceae;g__Enterobacter;s__Enterobacter cloacae                       |
| MLG 419 | 15 | 50085 | 9105  | 6043  | 13.14 | gii372283141 emb HE613569.1 | 2130034 | 6733  | 0.32 | 372 | k__Bacteria;p__Firmicutes;c__Bacilli;o__Lactobacillales;f__Streptococcaceae;g__Streptococcus;s__Streptococcus macedonicus                                     |
| MLG 420 | 23 | 49033 | 6292  | 45768 | 99.59 | gii170517292 gb C P000970.1 | 5068389 | 45299 | 0.89 | 1   | k__Bacteria;p__Proteobacteria;c__Gammaproteobacteria;o__Enterobacteriales;f__Enterobacteriaceae;g__Escherichia;s__Escherichia coli                            |

|         |    |       |       |       |       |                             |         |       |      |     |                                                                                                                                                               |
|---------|----|-------|-------|-------|-------|-----------------------------|---------|-------|------|-----|---------------------------------------------------------------------------------------------------------------------------------------------------------------|
| MLG 421 | 8  | 48894 | 17127 | 39344 | 86.06 | gii571260215 emb HF571988.1 | 4940199 | 40502 | 0.82 | 296 | k__Bacteria;p__Proteobacteria;c__Gammaproteobacteria;o__Enterobacteriales;f__Enterobacteriaceae;g__Yersinia;s__Yersinia enterocolitica                        |
| MLG 422 | 13 | 48673 | 14325 | 0     | 0     | 0                           | -       | 0     | 0    | 0   | Unknow                                                                                                                                                        |
| MLG 424 | 6  | 48554 | 14282 | 31042 | 70.1  | gii253992019 gb C_P000094.2 | 6438405 | 30655 | 0.48 | 317 | k__Bacteria;p__Proteobacteria;c__Gammaproteobacteria;o__Pseudomonadales;f__Pseudomonadaceae;g__Pseudomonas;s__Pseudomonas fluorescens                         |
| MLG 425 | 12 | 48109 | 20830 | 29967 | 67.91 | gii689262542 gb C_P009451.1 | 4876443 | 33754 | 0.69 | 19  | k__Bacteria;p__Proteobacteria;c__Gammaproteobacteria;o__Enterobacteriales;f__Enterobacteriaceae;g__Cedecea;s__Cedecea neteri                                  |
| MLG 426 | 17 | 47982 | 5510  | 13271 | 30.21 | gii145316543 gb C_P000653.1 | 4518712 | 13269 | 0.29 | 272 | k__Bacteria;p__Proteobacteria;c__Gammaproteobacteria;o__Enterobacteriales;f__Enterobacteriaceae;g__Enterobacter;s__Enterobacter sp. 638                       |
| MLG 427 | 14 | 47672 | 10658 | 0     | 0     | 0                           | -       | 0     | 0    | 0   | Unknow                                                                                                                                                        |
| MLG 428 | 7  | 47649 | 20576 | 34235 | 78.4  | gii150953431 gb C_P000647.1 | 5315120 | 34247 | 0.64 | 7   | k__Bacteria;p__Proteobacteria;c__Gammaproteobacteria;o__Enterobacteriales;f__Enterobacteriaceae;g__Klebsiella;s__Klebsiella pneumoniae                        |
| MLG 430 | 10 | 47350 | 8298  | 8972  | 20.62 | gii664693170 gb C_P005998.1 | 4944397 | 8973  | 0.18 | 1   | k__Bacteria;p__Proteobacteria;c__Gammaproteobacteria;o__Enterobacteriales;f__Enterobacteriaceae;g__Escherichia;s__Escherichia coli                            |
| MLG 431 | 13 | 47278 | 8176  | 38628 | 88.81 | gii440045023 gb C_P003938.1 | 4762179 | 38799 | 0.81 | 3   | k__Bacteria;p__Proteobacteria;c__Gammaproteobacteria;o__Enterobacteriales;f__Enterobacteriaceae;g__Unclassified;s__Enterobacteriaceae bacterium strain FGI 57 |
| MLG 432 | 6  | 46869 | 35351 | 6535  | 15.12 | gii291482100 emb FN665653.1 | 4047729 | 6977  | 0.17 | 22  | k__Bacteria;p__Firmicutes;c__Clostridia;o__Clostridiales;f__Peptostreptococaceae;g__Peptoclostridium;s__Peptoclostridium difficile                            |
| MLG 433 | 61 | 46802 | 2039  | 607   | 1.41  | gii392334715 gb C_P003504.1 | 2827741 | 1381  | 0.05 | 108 | k__Bacteria;p__Firmicutes;c__Bacilli;o__Lactobacillales;f__Enterococaceae;g__Enterococcus;s__Enterococcus hirae                                               |
| MLG 434 | 7  | 46726 | 23800 | 6032  | 14.04 | gii667688329 gb C_P007588.1 | 1355853 | 6032  | 0.44 | 457 | k__Bacteria;p__Firmicutes;c__Bacilli;o__Lactobacillales;f__Leuconostocaceae;g__Weissella;s__Weissella ceti                                                    |
| MLG 435 | 10 | 46624 | 10450 | 17629 | 41.07 | gii323272819 dbj AP012052.1 | 3982034 | 17802 | 0.45 | 956 | k__Bacteria;p__Actinobacteria;c__Actinobacteria;o__Actinomycetales;f__Microbacteriaceae;g__Microbacterium;s__Microbacterium testaceum                         |
| MLG 436 | 9  | 46564 | 8458  | 5249  | 12.25 | gii478439721 gb C_P004856.1 | 3427276 | 5247  | 0.15 | 363 | k__Bacteria;p__Firmicutes;c__Bacilli;o__Lactobacillales;f__Enterococaceae;g__Enterococcus;s__Enterococcus casseliflavus                                       |
| MLG 437 | 20 | 46395 | 5574  | 4491  | 10.49 | gii322506180 gb C_P001921.1 | 3940614 | 4491  | 0.11 | 552 | k__Bacteria;p__Proteobacteria;c__Gammaproteobacteria;o__Pseudomonadales;f__Moraxellaceae;g__Acinetobacter;s__Acinetobacter baumannii                          |
| MLG 438 | 24 | 46387 | 7597  | 1254  | 2.94  | gii343181122 dbj AP009333.1 | 1963964 | 1248  | 0.06 | 365 | k__Bacteria;p__Firmicutes;c__Bacilli;o__Lactobacillales;f__Streptococaceae;g__Lactococcus;s__Lactococcus garvieae                                             |
| MLG 440 | 8  | 45980 | 22727 | 17930 | 42.11 | gii281374316 gb C_P001834.1 | 2598144 | 18077 | 0.7  | 88  | k__Bacteria;p__Firmicutes;c__Bacilli;o__Lactobacillales;f__Streptococaceae;g__Lactococcus;s__Lactococcus lactis                                               |
| MLG 441 | 7  | 45957 | 13483 | 18637 | 44.12 | gii206564770 gb C_P000964.1 | 5641239 | 18683 | 0.33 | 7   | k__Bacteria;p__Proteobacteria;c__Gammaproteobacteria;o__Enterobacteriales;f__Enterobacteriaceae;g__Klebsiella;s__Klebsiella pneumoniae                        |
| MLG 442 | 13 | 45717 | 6483  | 14627 | 34.8  | gii387159426 gb C_P003041.1 | 5962570 | 14614 | 0.25 | 317 | k__Bacteria;p__Proteobacteria;c__Gammaproteobacteria;o__Pseudomonadales;f__Pseudomonadaceae;g__Pseudomonas;s__Pseudomonas fluorescens                         |
| MLG 443 | 11 | 45625 | 7396  | 7878  | 18.77 | gii282947233 emb FN543502.1 | 5346659 | 7922  | 0.15 | 266 | k__Bacteria;p__Proteobacteria;c__Gammaproteobacteria;o__Enterobacteriales;f__Enterobacteriaceae;g__Citrobacter;s__Citrobacter rodentium                       |
| MLG 444 | 23 | 45472 | 7666  | 498   | 1.19  | gii300213939 gb C_P002034.1 | 1828169 | 498   | 0.03 | 192 | k__Bacteria;p__Firmicutes;c__Bacilli;o__Lactobacillales;f__Lactobacillaceae;g__Lactobacillus;s__Lactobacillus salivarius                                      |
| MLG 446 | 21 | 44282 | 8880  | 21099 | 50.57 | gii527122546 gb C_P003025.1 | 1975547 | 21100 | 1.07 | 207 | k__Bacteria;p__Firmicutes;c__Bacilli;o__Lactobacillales;f__Streptococaceae;g__Streptococcus;s__Streptococcus lutetiensis                                      |
| MLG 447 | 26 | 44130 | 5658  | 11897 | 28.55 | gii619734722 gb C_P007557.1 | 5099034 | 11898 | 0.23 | 267 | k__Bacteria;p__Proteobacteria;c__Gammaproteobacteria;o__Enterobacteriales;f__Enterobacteriaceae;g__Citrobacter;s__Citrobacter freundii                        |
| MLG 448 | 4  | 43926 | 16159 | 25563 | 61.74 | gii392322800 gb C_P003678.1 | 4968248 | 26024 | 0.52 | 4   | k__Bacteria;p__Proteobacteria;c__Gammaproteobacteria;o__Enterobacteriales;f__Enterobacteriaceae;g__Enterobacter;s__Enterobacter cloacae                       |
| MLG 449 | 73 | 43894 | 5789  | 4260  | 10.33 | gii558607752 dbj AP013036.1 | 3022186 | 4261  | 0.14 | 153 | k__Bacteria;p__Firmicutes;c__Bacilli;o__Lactobacillales;f__Enterococaceae;g__Enterococcus;s__Enterococcus mundtii                                             |
| MLG 450 | 3  | 43669 | 22574 | 5573  | 13.63 | gii692326398 gb C_P009472.1 | 2398091 | 6029  | 0.25 | 88  | k__Bacteria;p__Firmicutes;c__Bacilli;o__Lactobacillales;f__Streptococaceae;g__Lactococcus;s__Lactococcus lactis                                               |
| MLG 451 | 6  | 43634 | 12356 | 26199 | 64.21 | gii222031834 emb CU651637.1 | 4773108 | 13651 | 0.29 | 1   | k__Bacteria;p__Proteobacteria;c__Gammaproteobacteria;o__Enterobacteriales;f__Enterobacteriaceae;g__Escherichia;s__Escherichia coli                            |



|         |    |       |       |       |       |                              |         |       |      |     |                                                                                                                                                               |
|---------|----|-------|-------|-------|-------|------------------------------|---------|-------|------|-----|---------------------------------------------------------------------------------------------------------------------------------------------------------------|
| MLG 452 | 8  | 43508 | 17821 | 10963 | 26.89 | gii295095013 emb FP929040.1  | 4908759 | 11763 | 0.24 | 4   | k__Bacteria;p__Proteobacteria;c__Gammaproteobacteria;o__Enterobacteriales;f__Enterobacteriaceae;g__Enterobacter;s__Enterobacter cloacae                       |
| MLG 453 | 11 | 43496 | 11473 | 20642 | 50.98 | gii619734722 gb C P007557.1  | 5099034 | 20800 | 0.41 | 267 | k__Bacteria;p__Proteobacteria;c__Gammaproteobacteria;o__Enterobacteriales;f__Enterobacteriaceae;g__Citrobacter;s__Citrobacter freundii                        |
| MLG 454 | 52 | 43234 | 3873  | 37002 | 91.43 | gii392334715 gb C P003504.1  | 2827741 | 38241 | 1.35 | 108 | k__Bacteria;p__Firmicutes;c__Bacilli;o__Lactobacillales;f__Enterococcaceae;g__Enterococcus;s__Enterococcus hirae                                              |
| MLG 455 | 4  | 43053 | 25151 | 880   | 2.18  | gii10681940 gb C P000312.1   | 2897393 | 880   | 0.03 | 21  | k__Bacteria;p__Firmicutes;c__Clostridia;o__Clostridiales;f__Clostridiaceae;g__Clostridium;s__Clostridium perfringens                                          |
| MLG 457 | 24 | 42957 | 5004  | 18947 | 47.11 | gii334279325 db j AP012053.1 | 2362241 | 19036 | 0.81 | 373 | k__Bacteria;p__Firmicutes;c__Bacilli;o__Lactobacillales;f__Streptococcaceae;g__Streptococcus;s__Streptococcus gallolyticus                                    |
| MLG 458 | 25 | 42926 | 3925  | 19079 | 47.65 | gii445187230 gb C P004063.1  | 2635572 | 19815 | 0.75 | 165 | k__Bacteria;p__Firmicutes;c__Bacilli;o__Lactobacillales;f__Enterococcaceae;g__Enterococcus;s__Enterococcus faecium                                            |
| MLG 459 | 15 | 42849 | 7969  | 33590 | 83.9  | gii440045023 gb C P003938.1  | 4762179 | 34998 | 0.73 | 3   | k__Bacteria;p__Proteobacteria;c__Gammaproteobacteria;o__Enterobacteriales;f__Enterobacteriaceae;g__Unclassified;s__Enterobacteriaceae bacterium strain FGI 57 |
| MLG 460 | 6  | 42806 | 16507 | 28655 | 72.38 | gii569535620 gb C P007025.1  | 4701875 | 24260 | 0.52 | 264 | k__Bacteria;p__Proteobacteria;c__Gammaproteobacteria;o__Enterobacteriales;f__Enterobacteriaceae;g__Escherichia;s__Escherichia albertii                        |
| MLG 463 | 12 | 42669 | 11021 | 0     | 0     | 0                            | -       | 0     | 0    | 0   | Unknow                                                                                                                                                        |
| MLG 464 | 8  | 42607 | 8252  | 8138  | 20.82 | gii122087364 emb AM286415.1  | 4615899 | 8139  | 0.18 | 296 | k__Bacteria;p__Proteobacteria;c__Gammaproteobacteria;o__Enterobacteriales;f__Enterobacteriaceae;g__Yersinia;s__Yersinia enterocolitica                        |
| MLG 465 | 18 | 42579 | 19944 | 37825 | 97.05 | gii571260215 emb HF571988.1  | 4940199 | 41487 | 0.84 | 296 | k__Bacteria;p__Proteobacteria;c__Gammaproteobacteria;o__Enterobacteriales;f__Enterobacteriaceae;g__Yersinia;s__Yersinia enterocolitica                        |
| MLG 466 | 11 | 42239 | 9461  | 0     | 0     | 0                            | -       | 0     | 0    | 0   | Unknow                                                                                                                                                        |
| MLG 467 | 5  | 42037 | 13389 | 3964  | 10.23 | gii291482099 emb FN665652.1  | 4159517 | 3807  | 0.09 | 22  | k__Bacteria;p__Firmicutes;c__Clostridia;o__Clostridiales;f__Peptostreptococcaceae;g__Peptoclostridium;s__Peptoclostridium difficile                           |
| MLG 468 | 4  | 41977 | 23216 | 21600 | 56.2  | gii552063405 gb C P006766.1  | 2589250 | 34323 | 1.33 | 88  | k__Bacteria;p__Firmicutes;c__Bacilli;o__Lactobacillales;f__Streptococcaceae;g__Lactococcus;s__Lactococcus lactis                                              |
| MLG 469 | 13 | 41929 | 6109  | 15129 | 39.4  | gii662706586 gb C P008841.1  | 5865090 | 16428 | 0.28 | 12  | k__Bacteria;p__Proteobacteria;c__Gammaproteobacteria;o__Enterobacteriales;f__Enterobacteriaceae;g__Klebsiella;s__Klebsiella oxytoca                           |
| MLG 470 | 7  | 41752 | 24827 | 33838 | 88.85 | gii307625127 gb C P002167.1  | 4993013 | 26169 | 0.52 | 1   | k__Bacteria;p__Proteobacteria;c__Gammaproteobacteria;o__Enterobacteriales;f__Enterobacteriaceae;g__Escherichia;s__Escherichia coli                            |
| MLG 471 | 15 | 41723 | 12953 | 31175 | 81.87 | gii116100249 gb C P000419.1  | 1856368 | 31160 | 1.68 | 379 | k__Bacteria;p__Firmicutes;c__Bacilli;o__Lactobacillales;f__Streptococcaceae;g__Streptococcus;s__Streptococcus thermophilus                                    |
| MLG 472 | 6  | 41678 | 21447 | 0     | 0     | 0                            | -       | 0     | 0    | 0   | Unknow                                                                                                                                                        |
| MLG 473 | 12 | 41402 | 22731 | 31727 | 84.06 | gii619734722 gb C P007557.1  | 5099034 | 32960 | 0.65 | 267 | k__Bacteria;p__Proteobacteria;c__Gammaproteobacteria;o__Enterobacteriales;f__Enterobacteriaceae;g__Citrobacter;s__Citrobacter freundii                        |
| MLG 474 | 16 | 41236 | 6205  | 18715 | 49.73 | gii218363708 emb CU928161.2  | 5032268 | 29470 | 0.59 | 1   | k__Bacteria;p__Proteobacteria;c__Gammaproteobacteria;o__Enterobacteriales;f__Enterobacteriaceae;g__Escherichia;s__Escherichia coli                            |
| MLG 477 | 20 | 40874 | 14577 | 37143 | 99.96 | gii400173048 gb C P003737.1  | 4726582 | 37141 | 0.79 | 4   | k__Bacteria;p__Proteobacteria;c__Gammaproteobacteria;o__Enterobacteriales;f__Enterobacteriaceae;g__Enterobacter;s__Enterobacter cloacae                       |
| MLG 478 | 5  | 40801 | 14942 | 5323  | 14.34 | gii158967071 gb C P000033.3  | 1993560 | 6344  | 0.32 | 212 | k__Bacteria;p__Firmicutes;c__Bacilli;o__Lactobacillales;f__Lactobacillaceae;g__Lactobacillus;s__Lactobacillus acidophilus                                     |
| MLG 479 | 25 | 40770 | 6152  | 20347 | 55.06 | gii206564770 gb C P000964.1  | 5641239 | 21876 | 0.39 | 7   | k__Bacteria;p__Proteobacteria;c__Gammaproteobacteria;o__Enterobacteriales;f__Enterobacteriaceae;g__Klebsiella;s__Klebsiella pneumoniae                        |
| MLG 480 | 6  | 40487 | 10115 | 21922 | 59.6  | gii326405597 gb C P002365.1  | 2399458 | 22798 | 0.95 | 88  | k__Bacteria;p__Firmicutes;c__Bacilli;o__Lactobacillales;f__Streptococcaceae;g__Lactococcus;s__Lactococcus lactis                                              |
| MLG 481 | 25 | 40469 | 4214  | 1006  | 2.75  | gii527122546 gb C P003025.1  | 1975547 | 2656  | 0.13 | 207 | k__Bacteria;p__Firmicutes;c__Bacilli;o__Lactobacillales;f__Streptococcaceae;g__Streptococcus;s__Streptococcus lutetiensis                                     |
| MLG 482 | 19 | 40423 | 13898 | 18485 | 50.7  | gii571260215 emb HF571988.1  | 4940199 | 18483 | 0.37 | 296 | k__Bacteria;p__Proteobacteria;c__Gammaproteobacteria;o__Enterobacteriales;f__Enterobacteriaceae;g__Yersinia;s__Yersinia enterocolitica                        |
| MLG 483 | 12 | 40285 | 24472 | 12363 | 34.12 | gii554510692 gb C P006784.1  | 5129938 | 11129 | 0.22 | 1   | k__Bacteria;p__Proteobacteria;c__Gammaproteobacteria;o__Enterobacteriales;f__Enterobacteriaceae;g__Escherichia;s__Escherichia coli                            |

|         |    |       |       |       |       |                             |         |       |      |      |                                                                                                                                            |
|---------|----|-------|-------|-------|-------|-----------------------------|---------|-------|------|------|--------------------------------------------------------------------------------------------------------------------------------------------|
| MLG 484 | 9  | 40219 | 13292 | 35995 | 99.77 | gii124491690 emb AM406671.1 | 2529478 | 37013 | 1.46 | 88   | k__Bacteria;p__Firmicutes;c__Bacilli;o__Lactobacillales;f__Streptococcaceae;g__Lactococcus;s__Lactococcus lactis                           |
| MLG 486 | 9  | 40043 | 11659 | 12757 | 35.74 | gii660567586 gb C P008788.1 | 6152190 | 12822 | 0.21 | 12   | k__Bacteria;p__Proteobacteria;c__Gammaproteobacteria;o__Enterobacteriales;f__Enterobacteriaceae;g__Klebsiella;s__Klebsiella oxytoca        |
| MLG 487 | 7  | 40035 | 10687 | 33843 | 95.09 | gii254044096 gb C P001617.1 | 3197759 | 34621 | 1.08 | 385  | k__Bacteria;p__Firmicutes;c__Bacilli;o__Lactobacillales;f__Lactobacillaceae;g__Lactobacillus;s__Lactobacillus plantarum                    |
| MLG 488 | 4  | 39590 | 24731 | 18424 | 52.27 | gii512154926 gb C P006011.1 | 1947706 | 16934 | 0.87 | 367  | k__Bacteria;p__Firmicutes;c__Bacilli;o__Lactobacillales;f__Lactobacillaceae;g__Lactobacillus;s__Lactobacillus reuteri                      |
| MLG 489 | 7  | 39304 | 14716 | 3855  | 10.94 | gii188497817 gb C P001078.1 | 3659644 | 3996  | 0.11 | 20   | k__Bacteria;p__Firmicutes;c__Clostridia;o__Clostridiales;f__Clostridiaceae;g__Clostridium;s__Clostridium botulinum                         |
| MLG 490 | 7  | 39231 | 12762 | 1064  | 3.03  | gii480474683 gb C P004142.1 | 5398151 | 1058  | 0.02 | 14   | k__Bacteria;p__Proteobacteria;c__Gammaproteobacteria;o__Enterobacteriales;f__Enterobacteriaceae;g__Raoultella;s__Raoultella omithinolytica |
| MLG 491 | 3  | 39164 | 13280 | 2192  | 6.25  | gii312944605 gb C P001855.1 | 4747819 | 2193  | 0.05 | 1    | k__Bacteria;p__Proteobacteria;c__Gammaproteobacteria;o__Enterobacteriales;f__Enterobacteriaceae;g__Escherichia;s__Escherichia coli         |
| MLG 492 | 12 | 39091 | 6446  | 7161  | 20.61 | gii674993598 dbj AP014630.1 | 4648418 | 7296  | 0.16 | 206  | k__Bacteria;p__Proteobacteria;c__Gammaproteobacteria;o__Pseudomonadales;f__Moraxellaceae;g__Acinetobacter;s__Acinetobacter guillouiae      |
| MLG 493 | 7  | 38973 | 12069 | 34683 | 100   | gii569535620 gb C P007025.1 | 4701875 | 35604 | 0.76 | 264  | k__Bacteria;p__Proteobacteria;c__Gammaproteobacteria;o__Enterobacteriales;f__Enterobacteriaceae;g__Escherichia;s__Escherichia albertii     |
| MLG 494 | 5  | 38771 | 23072 | 22888 | 66.26 | gii339759707 gb C P002910.1 | 5259571 | 24341 | 0.46 | 7    | k__Bacteria;p__Proteobacteria;c__Gammaproteobacteria;o__Enterobacteriales;f__Enterobacteriaceae;g__Klebsiella;s__Klebsiella pneumoniae     |
| MLG 495 | 51 | 38751 | 3445  | 15077 | 43.67 | gii672605233 gb C P006704.1 | 6062703 | 15609 | 0.26 | 1008 | k__Bacteria;p__Proteobacteria;c__Betaproteobacteria;o__Burkholderiales;f__Comamonadaceae;g__Comamonas;s__Comamonas testosteroni            |
| MLG 496 | 12 | 38435 | 9745  | 27876 | 80.89 | gii554510692 gb C P006784.1 | 5129938 | 18787 | 0.37 | 1    | k__Bacteria;p__Proteobacteria;c__Gammaproteobacteria;o__Enterobacteriales;f__Enterobacteriaceae;g__Escherichia;s__Escherichia coli         |
| MLG 498 | 5  | 38399 | 11512 | 18842 | 54.89 | gii353737348 gb C P002644.1 | 2183059 | 22642 | 1.04 | 34   | k__Bacteria;p__Firmicutes;c__Bacilli;o__Lactobacillales;f__Streptococcaceae;g__Streptococcus;s__Streptococcus suis                         |
| MLG 499 | 5  | 38085 | 12728 | 29675 | 87.12 | gii110341805 gb C P000247.1 | 4938920 | 30419 | 0.62 | 1    | k__Bacteria;p__Proteobacteria;c__Gammaproteobacteria;o__Enterobacteriales;f__Enterobacteriaceae;g__Escherichia;s__Escherichia coli         |
| MLG 500 | 7  | 38079 | 11590 | 20511 | 60.69 | gii667688329 gb C P007588.1 | 1355853 | 18012 | 1.33 | 457  | k__Bacteria;p__Firmicutes;c__Bacilli;o__Lactobacillales;f__Leuconostocaceae;g__Weissella;s__Weissella ceti                                 |
| MLG 501 | 7  | 38038 | 9212  | 33728 | 99.95 | gii455418716 gb C P004345.1 | 3799539 | 34176 | 0.9  | 301  | k__Bacteria;p__Proteobacteria;c__Gammaproteobacteria;o__Enterobacteriales;f__Enterobacteriaceae;g__Morganelle;s__Morganelle morgani        |
| MLG 502 | 11 | 37744 | 14808 | 3335  | 9.91  | gii47118322 dbj B A000016.3 | 3031430 | 3335  | 0.11 | 21   | k__Bacteria;p__Firmicutes;c__Clostridia;o__Clostridiales;f__Clostridiaceae;g__Clostridium;s__Clostridium perfringens                       |
| MLG 503 | 3  | 37634 | 13333 | 15156 | 45.06 | gii682108593 gb C P008897.1 | 4633407 | 16480 | 0.36 | 4    | k__Bacteria;p__Proteobacteria;c__Gammaproteobacteria;o__Enterobacteriales;f__Enterobacteriaceae;g__Enterobacter;s__Enterobacter cloacae    |
| MLG 504 | 5  | 37357 | 10084 | 32845 | 98.36 | gii169887498 gb C P000948.1 | 4686137 | 33749 | 0.72 | 1    | k__Bacteria;p__Proteobacteria;c__Gammaproteobacteria;o__Enterobacteriales;f__Enterobacteriaceae;g__Escherichia;s__Escherichia coli         |
| MLG 505 | 12 | 37271 | 8750  | 18484 | 55.84 | gii218359353 emb CU928160.2 | 4700560 | 18487 | 0.39 | 1    | k__Bacteria;p__Proteobacteria;c__Gammaproteobacteria;o__Enterobacteriales;f__Enterobacteriaceae;g__Escherichia;s__Escherichia coli         |
| MLG 506 | 4  | 37158 | 17721 | 0     | 0     | 0                           | -       | 0     | 0    | 0    | Unknow                                                                                                                                     |
| MLG 507 | 31 | 37115 | 6473  | 0     | 0     | 0                           | -       | 0     | 0    | 0    | Unknow                                                                                                                                     |
| MLG 508 | 10 | 36952 | 6272  | 20475 | 63.97 | gii122087364 emb AM286415.1 | 4615899 | 21999 | 0.48 | 296  | k__Bacteria;p__Proteobacteria;c__Gammaproteobacteria;o__Enterobacteriales;f__Enterobacteriaceae;g__Yersinia;s__Yersinia enterocolitica     |
| MLG 509 | 23 | 36784 | 7458  | 28357 | 88.77 | gii394343076 gb C P003683.1 | 6097032 | 28425 | 0.47 | 12   | k__Bacteria;p__Proteobacteria;c__Gammaproteobacteria;o__Enterobacteriales;f__Enterobacteriaceae;g__Klebsiella;s__Klebsiella oxytoca        |
| MLG 511 | 11 | 36541 | 20478 | 2251  | 7.16  | gii188497817 gb C P001078.1 | 3659644 | 2311  | 0.06 | 20   | k__Bacteria;p__Firmicutes;c__Clostridia;o__Clostridiales;f__Clostridiaceae;g__Clostridium;s__Clostridium botulinum                         |
| MLG 512 | 9  | 36459 | 7664  | 23758 | 75.81 | gii674993598 dbj AP014630.1 | 4648418 | 23664 | 0.51 | 206  | k__Bacteria;p__Proteobacteria;c__Gammaproteobacteria;o__Pseudomonadales;f__Moraxellaceae;g__Acinetobacter;s__Acinetobacter guillouiae      |
| MLG 513 | 3  | 36239 | 21221 | 6980  | 22.4  | gii374681091 gb C P003295.1 | 1988420 | 6978  | 0.35 | 228  | k__Bacteria;p__Firmicutes;c__Bacilli;o__Lactobacillales;f__Streptococcaceae;g__Streptococcus;s__Streptococcus infantarius                  |

|         |    |       |       |       |       |                             |         |       |      |      |                                                                                                                                              |
|---------|----|-------|-------|-------|-------|-----------------------------|---------|-------|------|------|----------------------------------------------------------------------------------------------------------------------------------------------|
| MLG 514 | 8  | 36079 | 18317 | 14546 | 46.74 | gii49529273[emb]C R543861.1 | 3598621 | 14547 | 0.4  | 410  | k__Bacteria;p__Proteobacteria;c__Gammaproteobacteria;o__Pseudomonadales;f__Moraxellaceae;g__Acinetobacter;s__Acinetobacter sp. ADP1          |
| MLG 515 | 5  | 35715 | 12497 | 0     | 0     | 0                           | -       | 0     | 0    | 0    | Unknow                                                                                                                                       |
| MLG 516 | 14 | 35698 | 5394  | 7804  | 25.22 | gii696593549[gb]C P009565.1 | 4726694 | 7800  | 0.17 | 5    | k__Bacteria;p__Proteobacteria;c__Gammaproteobacteria;o__Enterobacteriales;f__Enterobacteriaceae;g__Salmonella;s__Salmonella enterica         |
| MLG 517 | 12 | 35592 | 6162  | 9844  | 31.88 | gii569535620[gb]C P007025.1 | 4701875 | 10125 | 0.22 | 264  | k__Bacteria;p__Proteobacteria;c__Gammaproteobacteria;o__Enterobacteriales;f__Enterobacteriaceae;g__Escherichia;s__Escherichia albertii       |
| MLG 519 | 7  | 35246 | 23374 | 26120 | 86.74 | gii612150118[gb]C P007546.1 | 4561905 | 29129 | 0.64 | 9    | k__Bacteria;p__Proteobacteria;c__Gammaproteobacteria;o__Enterobacteriales;f__Enterobacteriaceae;g__Enterobacter;s__Enterobacter asburiae     |
| MLG 520 | 17 | 35238 | 11302 | 3649  | 12.35 | gii295092884[emb]FP929039.1 | 3123007 | 3658  | 0.12 | 1281 | k__Bacteria;p__Firmicutes;c__Clostridia;o__Clostridiales;f__Lachnospiraceae;g__Coprococcus;s__Coprococcus sp. ART55/1                        |
| MLG 521 | 6  | 35143 | 13088 | 0     | 0     | 0                           | -       | 0     | 0    | 0    | Unknow                                                                                                                                       |
| MLG 522 | 10 | 35060 | 14219 | 10606 | 36.55 | gii365906294[gb]C P003218.1 | 5974109 | 11271 | 0.19 | 12   | k__Bacteria;p__Proteobacteria;c__Gammaproteobacteria;o__Enterobacteriales;f__Enterobacteriaceae;g__Klebsiella;s__Klebsiella oxytoca          |
| MLG 525 | 8  | 34748 | 5899  | 24506 | 85.99 | gii308746527[gb]C P002272.1 | 4814049 | 26190 | 0.54 | 8    | k__Bacteria;p__Proteobacteria;c__Gammaproteobacteria;o__Enterobacteriales;f__Enterobacteriaceae;g__Enterobacter;s__Enterobacter lignolyticus |
| MLG 526 | 4  | 34683 | 11777 | 8098  | 28.96 | gii257751862[dbj]AP010953.1 | 5697240 | 8629  | 0.15 | 1    | k__Bacteria;p__Proteobacteria;c__Gammaproteobacteria;o__Enterobacteriales;f__Enterobacteriaceae;g__Escherichia;s__Escherichia coli           |
| MLG 527 | 5  | 34542 | 15391 | 27671 | 100   | gii209157093[gb]C P001164.1 | 5572075 | 27681 | 0.5  | 1    | k__Bacteria;p__Proteobacteria;c__Gammaproteobacteria;o__Enterobacteriales;f__Enterobacteriaceae;g__Escherichia;s__Escherichia coli           |
| MLG 528 | 8  | 34527 | 9232  | 13700 | 49.8  | gii218354981[emb]CU928158.2 | 4588711 | 14478 | 0.32 | 2    | k__Bacteria;p__Proteobacteria;c__Gammaproteobacteria;o__Enterobacteriales;f__Enterobacteriaceae;g__Escherichia;s__Escherichia fergusonii     |
| MLG 529 | 7  | 34460 | 15378 | 7575  | 27.73 | gii122087364[emb]AM286415.1 | 4615899 | 7557  | 0.16 | 296  | k__Bacteria;p__Proteobacteria;c__Gammaproteobacteria;o__Enterobacteriales;f__Enterobacteriaceae;g__Yersinia;s__Yersinia enterocolitica       |
| MLG 531 | 13 | 34359 | 6585  | 8104  | 29.84 | gii329666391[gb]C P002464.1 | 1966342 | 9889  | 0.5  | 193  | k__Bacteria;p__Firmicutes;c__Bacilli;o__Lactobacillales;f__Lactobacillaceae;g__Lactobacillus;s__Lactobacillus johnsonii                      |
| MLG 532 | 5  | 34326 | 21301 | 8206  | 30.34 | gii569535620[gb]C P007025.1 | 4701875 | 8196  | 0.17 | 264  | k__Bacteria;p__Proteobacteria;c__Gammaproteobacteria;o__Enterobacteriales;f__Enterobacteriaceae;g__Escherichia;s__Escherichia albertii       |
| MLG 533 | 8  | 34063 | 12714 | 750   | 2.78  | gii329666391[gb]C P002464.1 | 1966342 | 702   | 0.04 | 193  | k__Bacteria;p__Firmicutes;c__Bacilli;o__Lactobacillales;f__Lactobacillaceae;g__Lactobacillus;s__Lactobacillus johnsonii                      |
| MLG 534 | 5  | 33799 | 11415 | 1545  | 5.77  | gii426265132[gb]C P003880.1 | 6183388 | 1600  | 0.03 | 336  | k__Bacteria;p__Proteobacteria;c__Gammaproteobacteria;o__Pseudomonadales;f__Pseudomonadaceae;g__Pseudomonas;s__Pseudomonas sp. UW4            |
| MLG 535 | 13 | 33745 | 5432  | 26595 | 99.39 | gii290760697[gb]C P001846.1 | 5386352 | 26808 | 0.5  | 1    | k__Bacteria;p__Proteobacteria;c__Gammaproteobacteria;o__Enterobacteriales;f__Enterobacteriaceae;g__Escherichia;s__Escherichia coli           |
| MLG 536 | 16 | 33645 | 6088  | 6503  | 24.49 | gii527122546[gb]C P003025.1 | 1975547 | 6178  | 0.31 | 207  | k__Bacteria;p__Firmicutes;c__Bacilli;o__Lactobacillales;f__Streptococcaceae;g__Streptococcus;s__Streptococcus lutetiensis                    |
| MLG 537 | 5  | 33633 | 10967 | 17770 | 67.12 | gii392334715[gb]C P003504.1 | 2827741 | 23073 | 0.82 | 108  | k__Bacteria;p__Firmicutes;c__Bacilli;o__Lactobacillales;f__Enterococcaceae;g__Enterococcus;s__Enterococcus hirae                             |
| MLG 538 | 8  | 33393 | 8058  | 24792 | 93.87 | gii689262542[gb]C P009451.1 | 4876443 | 22359 | 0.46 | 19   | k__Bacteria;p__Proteobacteria;c__Gammaproteobacteria;o__Enterobacteriales;f__Enterobacteriaceae;g__Cedecea;s__Cedecea neteri                 |
| MLG 540 | 4  | 33101 | 18484 | 1436  | 5.52  | gii157081501[gb]C P000822.1 | 4720462 | 1436  | 0.03 | 6    | k__Bacteria;p__Proteobacteria;c__Gammaproteobacteria;o__Enterobacteriales;f__Enterobacteriaceae;g__Citrobacter;s__Citrobacter koseri         |
| MLG 543 | 5  | 32448 | 16075 | 9100  | 35.49 | gii612150118[gb]C P007546.1 | 4561905 | 10156 | 0.22 | 9    | k__Bacteria;p__Proteobacteria;c__Gammaproteobacteria;o__Enterobacteriales;f__Enterobacteriaceae;g__Enterobacter;s__Enterobacter asburiae     |
| MLG 544 | 9  | 32263 | 11251 | 264   | 1.03  | gii187720473[gb]C P001056.1 | 3800327 | 264   | 0.01 | 20   | k__Bacteria;p__Firmicutes;c__Clostridia;o__Clostridiales;f__Clostridiaceae;g__Clostridium;s__Clostridium botulinum                           |
| MLG 545 | 7  | 32007 | 9013  | 23080 | 90.18 | gii394343076[gb]C P003683.1 | 6097032 | 21942 | 0.36 | 12   | k__Bacteria;p__Proteobacteria;c__Gammaproteobacteria;o__Enterobacteriales;f__Enterobacteriaceae;g__Klebsiella;s__Klebsiella oxytoca          |
| MLG 547 | 5  | 31945 | 8337  | 24656 | 97.22 | gii115511419[gb]C P000468.1 | 5082025 | 24655 | 0.49 | 1    | k__Bacteria;p__Proteobacteria;c__Gammaproteobacteria;o__Enterobacteriales;f__Enterobacteriaceae;g__Escherichia;s__Escherichia coli           |
| MLG 549 | 5  | 31870 | 13848 | 8801  | 34.81 | gii600567586[gb]C P008788.1 | 6152190 | 9350  | 0.15 | 12   | k__Bacteria;p__Proteobacteria;c__Gammaproteobacteria;o__Enterobacteriales;f__Enterobacteriaceae;g__Klebsiella;s__Klebsiella oxytoca          |

|         |    |       |       |        |       |                              |         |        |       |     |                                                                                                                                               |
|---------|----|-------|-------|--------|-------|------------------------------|---------|--------|-------|-----|-----------------------------------------------------------------------------------------------------------------------------------------------|
| MLG 550 | 25 | 31458 | 2561  | 0      | 0     | 0                            | -       | 0      | 0     | 0   | Unknown                                                                                                                                       |
| MLG 551 | 11 | 31338 | 6910  | 22611  | 91.78 | gii325663854 gb C P002246.1  | 4552107 | 26342  | 0.58  | 296 | k__Bacteria;p__Proteobacteria;c__Gammaproteobacteria;o__Enterobacteriales;f__Enterobacteriaceae;g__Yersinia;s__Yersinia enterocolitica        |
| MLG 552 | 6  | 31167 | 12499 | 672    | 2.73  | gii343179174 dbj  AP009332.1 | 1950135 | 672    | 0.03  | 365 | k__Bacteria;p__Firmicutes;c__Bacilli;o__Lactobacillales;f__Streptococcaceae;g__Lactococcus;s__Lactococcus garvieae                            |
| MLG 554 | 7  | 31121 | 7466  | 8676   | 35.74 | gii619734722 gb C P007557.1  | 5099034 | 9038   | 0.18  | 267 | k__Bacteria;p__Proteobacteria;c__Gammaproteobacteria;o__Enterobacteriales;f__Enterobacteriaceae;g__Citrobacter;s__Citrobacter freundii        |
| MLG 555 | 9  | 31041 | 5570  | 14097  | 58.18 | gii526120653 gb C P006603.1  | 2145445 | 15443  | 0.72  | 367 | k__Bacteria;p__Firmicutes;c__Bacilli;o__Lactobacillales;f__Lactobacillaceae;g__Lactobacillus;s__Lactobacillus reuteri                         |
| MLG 556 | 5  | 30946 | 12783 | 15413  | 63.77 | gii660550561 gb C P008700.1  | 5365144 | 15813  | 0.29  | 7   | k__Bacteria;p__Proteobacteria;c__Gammaproteobacteria;o__Enterobacteriales;f__Enterobacteriaceae;g__Klebsiella;a__Klebsiella pneumoniae        |
| MLG 557 | 7  | 30875 | 8239  | 10704  | 44.39 | gii115511419 gb C P000468.1  | 5082025 | 12497  | 0.25  | 1   | k__Bacteria;p__Proteobacteria;c__Gammaproteobacteria;o__Enterobacteriales;f__Enterobacteriaceae;g__Escherichia;s__Escherichia coli            |
| MLG 558 | 5  | 30457 | 9141  | 5074   | 21.24 | gii32263428 gb AE 017125.1   | 1799146 | 5067   | 0.28  | 645 | k__Bacteria;p__Proteobacteria;c__Epsilonproteobacteria;o__Campylobacteriales;f__Helicobacteriaceae;g__Helicobacter;s__Helicobacter hepaticus  |
| MLG 562 | 9  | 30112 | 15944 | 10901  | 46.18 | gii619734722 gb C P007557.1  | 5099034 | 10890  | 0.21  | 267 | k__Bacteria;p__Proteobacteria;c__Gammaproteobacteria;o__Enterobacteriales;f__Enterobacteriaceae;g__Citrobacter er;s__Citrobacter freundii     |
| MLG 564 | 4  | 29553 | 11685 | 8333   | 35.51 | gii334279325 dbj  AP012053.1 | 2362241 | 14193  | 0.6   | 373 | k__Bacteria;p__Firmicutes;c__Bacilli;o__Lactobacillales;f__Streptococcaceae;g__Streptococcus;s__Streptococcus gallolyticus                    |
| MLG 565 | 14 | 29025 | 5947  | 22737  | 97.6  | gii209910450 dbj  AP009240.1 | 4887515 | 23022  | 0.47  | 1   | k__Bacteria;p__Proteobacteria;c__Gammaproteobacteria;o__Enterobacteriales;f__Enterobacteriaceae;g__Escherichia;s__Escherichia coli            |
| MLG 566 | 24 | 29017 | 2436  | 11078  | 47.85 | gii291482100 emb  FN665653.1 | 4047729 | 11649  | 0.29  | 22  | k__Bacteria;p__Firmicutes;c__Clostridia;o__Clostridiales;f__Peptostreptococcaceae;g__Peptoclostridium;s__Peptoclostridium difficile           |
| MLG 567 | 19 | 28852 | 7386  | 20082  | 86.98 | gii480474683 gb C P004142.1  | 5398151 | 20085  | 0.37  | 14  | k__Bacteria;p__Proteobacteria;c__Gammaproteobacteria;o__Enterobacteriales;f__Enterobacteriaceae;g__Raoultella;a__Raoultella omithinolytica    |
| MLG 569 | 3  | 28560 | 13897 | 10300  | 44.93 | gii118764602 dbj  AP009256.1 | 2089645 | 10302  | 0.49  | 893 | k__Bacteria;p__Actinobacteria;c__Actinobacteria;o__Bifidobacteriales;f__Bifidobacteriaceae;g__Bifidobacterium;s__Bifidobacterium adolescentis |
| MLG 570 | 13 | 28498 | 5787  | 0      | 0     | 0                            | -       | 0      | 0     | 0   | Unknown                                                                                                                                       |
| MLG 573 | 5  | 27960 | 11940 | 542    | 2.44  | gii338853710 gb C P002899.1  | 1422478 | 542    | 0.04  | 403 | k__Bacteria;p__Firmicutes;c__Bacilli;o__Lactobacillales;f__Leuconostocaceae;g__Weissella;s__Weissella korensis                                |
| MLG 575 | 3  | 27671 | 15609 | 5993   | 27.83 | gii378937014 gb C P003351.1  | 2955294 | 10337  | 0.35  | 165 | k__Bacteria;p__Firmicutes;c__Bacilli;o__Lactobacillales;f__Enterococcaceae;g__Enterococcus;s__Enterococcus faecium                            |
| MLG 577 | 6  | 27512 | 13059 | 620832 | 97.03 | gii121504137 gb C P000538.1  | 1616554 | 623243 | 38.55 | 98  | k__Bacteria;p__Proteobacteria;c__Epsilonproteobacteria;o__Campylobacteriales;f__Campylobacteriaceae;g__Campylobacter;s__Campylobacter jejuni  |
| MLG 578 | 7  | 27313 | 5459  | 377361 | 77.04 | gii690347849 gb C P007646.1  | 1836297 | 409956 | 22.33 | 192 | k__Bacteria;p__Firmicutes;c__Bacilli;o__Lactobacillales;f__Lactobacillaceae;g__Lactobacillus;s__Lactobacillus salivarius                      |
| MLG 579 | 5  | 27288 | 9093  | 189339 | 54.17 | gii341821300 emb  HE576794.1 | 2474718 | 191199 | 7.73  | 651 | k__Bacteria;p__Firmicutes;c__Negativicutes;o__Selenomonadales;f__Veillonellaceae;g__Megasphaera;s__Megasphaera elsdenii                       |
| MLG 580 | 21 | 27157 | 6278  | 0      | 0     | 0                            | -       | 0      | 0     | 0   | Unknown                                                                                                                                       |
| MLG 581 | 5  | 27050 | 9964  | 171509 | 83.42 | gii329666391 gb C P002464.1  | 1966342 | 175286 | 8.91  | 193 | k__Bacteria;p__Firmicutes;c__Bacilli;o__Lactobacillales;f__Lactobacillaceae;g__Lactobacillus;s__Lactobacillus johnsonii                       |
| MLG 582 | 6  | 26982 | 14331 | 59136  | 34.72 | gii527122546 gb C P003025.1  | 1975547 | 58491  | 2.96  | 207 | k__Bacteria;p__Firmicutes;c__Bacilli;o__Lactobacillales;f__Streptococcaceae;g__Streptococcus;s__Streptococcus lutetiensis                     |
| MLG 583 | 3  | 26797 | 11640 | 44831  | 31.35 | gii332341332 gb C P002729.1  | 5186416 | 44488  | 0.86  | 1   | k__Bacteria;p__Proteobacteria;c__Gammaproteobacteria;o__Enterobacteriales;f__Enterobacteriaceae;g__Escherichia;s__Escherichia coli            |
| MLG 584 | 5  | 26758 | 8080  | 0      | 0     | 0                            | -       | 0      | 0     | 0   | Unknown                                                                                                                                       |
| MLG 587 | 8  | 26555 | 8778  | 0      | 0     | 0                            | -       | 0      | 0     | 0   | Unknown                                                                                                                                       |
| MLG 588 | 25 | 26473 | 4469  | 0      | 0     | 0                            | -       | 0      | 0     | 0   | Unknown                                                                                                                                       |

|         |    |       |       |       |       |                              |         |       |      |     |                                                                                                                                                               |
|---------|----|-------|-------|-------|-------|------------------------------|---------|-------|------|-----|---------------------------------------------------------------------------------------------------------------------------------------------------------------|
| MLG 589 | 6  | 26411 | 7231  | 0     | 0     | 0                            | -       | 0     | 0    | 0   | Unknown                                                                                                                                                       |
| MLG 590 | 4  | 26408 | 13915 | 64494 | 69.32 | gii440045023 gb C P003938.1  | 4762179 | 65299 | 1.37 | 3   | k__Bacteria;p__Proteobacteria;c__Gammaproteobacteria;o__Enterobacteriales;f__Enterobacteriaceae;g__Unclassified;s__Enterobacteriaceae bacterium strain FGI 57 |
| MLG 591 | 4  | 26020 | 12387 | 5396  | 6.44  | gii662712225 gb C P008823.1  | 4852980 | 5894  | 0.12 | 4   | k__Bacteria;p__Proteobacteria;c__Gammaproteobacteria;o__Enterobacteriales;f__Enterobacteriaceae;g__Enterobacter;s__Enterobacter cloacae                       |
| MLG 592 | 15 | 25880 | 5361  | 55560 | 67.46 | gii569550235 gb C P003999.1  | 5307003 | 34691 | 0.65 | 7   | k__Bacteria;p__Proteobacteria;c__Gammaproteobacteria;o__Enterobacteriales;f__Enterobacteriaceae;g__Klebsiella pneumoniae                                      |
| MLG 593 | 11 | 25833 | 5055  | 0     | 0     | 0                            | -       | 0     | 0    | 0   | Unknown                                                                                                                                                       |
| MLG 595 | 12 | 25642 | 3736  | 18397 | 23.84 | gii383101383 gb C P002291.1  | 4935294 | 27974 | 0.57 | 1   | k__Bacteria;p__Proteobacteria;c__Gammaproteobacteria;o__Enterobacteriales;f__Enterobacteriaceae;g__Escherichia;s__Escherichia coli                            |
| MLG 596 | 10 | 25621 | 12064 | 0     | 0     | 0                            | -       | 0     | 0    | 0   | Unknown                                                                                                                                                       |
| MLG 597 | 6  | 25593 | 7296  | 45167 | 61.51 | gii116094265 gb C P000413.1  | 1894360 | 64978 | 3.43 | 384 | k__Bacteria;p__Firmicutes;c__Bacilli;o__Lactobacillales;f__Lactobacillaceae;g__Lactobacillus;s__Lactobacillus gasseri                                         |
| MLG 598 | 4  | 25485 | 11916 | 0     | 0     | 0                            | -       | 0     | 0    | 0   | Unknown                                                                                                                                                       |
| MLG 599 | 4  | 25360 | 14167 | 64152 | 95.44 | gii356601232 gb C P002797.2  | 4971461 | 33807 | 0.68 | 1   | k__Bacteria;p__Proteobacteria;c__Gammaproteobacteria;o__Enterobacteriales;f__Enterobacteriaceae;g__Escherichia;s__Escherichia coli                            |
| MLG 600 | 4  | 25317 | 9517  | 44000 | 66.59 | gii695172424 gb C P008929.1  | 5317001 | 36670 | 0.69 | 7   | k__Bacteria;p__Proteobacteria;c__Gammaproteobacteria;o__Enterobacteriales;f__Enterobacteriaceae;g__Klebsiella pneumoniae                                      |
| MLG 601 | 4  | 25280 | 8801  | 3002  | 4.65  | gii169752989 gb C P000946.1  | 4746218 | 5141  | 0.11 | 1   | k__Bacteria;p__Proteobacteria;c__Gammaproteobacteria;o__Enterobacteriales;f__Enterobacteriaceae;g__Escherichia;s__Escherichia coli                            |
| MLG 602 | 17 | 25042 | 5061  | 30870 | 49.36 | gii365906294 gb C P003218.1  | 5974109 | 31062 | 0.52 | 12  | k__Bacteria;p__Proteobacteria;c__Gammaproteobacteria;o__Enterobacteriales;f__Enterobacteriaceae;g__Klebsiella pneumoniae                                      |
| MLG 603 | 6  | 24635 | 6260  | 1488  | 2.4   | gii603129120 gb C P007332.1  | 4807994 | 1488  | 0.03 | 5   | k__Bacteria;p__Proteobacteria;c__Gammaproteobacteria;o__Enterobacteriales;f__Enterobacteriaceae;g__Salmonella;s__Salmonella enterica                          |
| MLG 604 | 13 | 24585 | 8348  | 42396 | 72.11 | gii582030173 gb C P006659.1  | 5435369 | 44612 | 0.82 | 7   | k__Bacteria;p__Proteobacteria;c__Gammaproteobacteria;o__Enterobacteriales;f__Enterobacteriaceae;g__Klebsiella pneumoniae                                      |
| MLG 606 | 5  | 24382 | 7209  | 18078 | 31.49 | gii339759707 gb C P002910.1  | 5259571 | 18992 | 0.36 | 7   | k__Bacteria;p__Proteobacteria;c__Gammaproteobacteria;o__Enterobacteriales;f__Enterobacteriaceae;g__Klebsiella pneumoniae                                      |
| MLG 609 | 6  | 24275 | 8175  | 3502  | 6.36  | gii675820319 emb  LM996882.1 | 1086344 | 3491  | 0.32 | 1   | k__Bacteria;p__Proteobacteria;c__Gammaproteobacteria;o__Enterobacteriales;f__Enterobacteriaceae;g__Escherichia;s__Escherichia coli                            |
| MLG 610 | 5  | 24229 | 9882  | 0     | 0     | 0                            | -       | 0     | 0    | 0   | Unknown                                                                                                                                                       |
| MLG 611 | 14 | 24171 | 8749  | 22115 | 41.03 | gii660577155 gb C P008797.1  | 5396164 | 24904 | 0.46 | 7   | k__Bacteria;p__Proteobacteria;c__Gammaproteobacteria;o__Enterobacteriales;f__Enterobacteriaceae;g__Klebsiella pneumoniae                                      |
| MLG 612 | 3  | 24113 | 10704 | 0     | 0     | 0                            | -       | 0     | 0    | 0   | Unknown                                                                                                                                                       |
| MLG 614 | 19 | 23889 | 10139 | 0     | 0     | 0                            | -       | 0     | 0    | 0   | Unknown                                                                                                                                                       |
| MLG 616 | 5  | 23805 | 8927  | 19489 | 37.95 | gii341821300 emb  HE576794.1 | 2474718 | 19496 | 0.79 | 651 | k__Bacteria;p__Firmicutes;c__Negativicutes;o__Selenomonadales;f__Veillonellaceae;g__Megasphaera;s__Megasphaera elsdenii                                       |
| MLG 617 | 5  | 23723 | 11197 | 50667 | 99.5  | gii569535620 gb C P007025.1  | 4701875 | 53428 | 1.14 | 264 | k__Bacteria;p__Proteobacteria;c__Gammaproteobacteria;o__Enterobacteriales;f__Enterobacteriaceae;g__Escherichia;s__Escherichia albertii                        |
| MLG 618 | 6  | 23637 | 11255 | 849   | 1.68  | gii121504137 gb C P000538.1  | 1616554 | 857   | 0.05 | 98  | k__Bacteria;p__Proteobacteria;c__Epsilonproteobacteria;o__Campylobacteriales;f__Campylobacteraceae;g__Campylobacter;s__Campylobacter jejuni                   |
| MLG 619 | 5  | 23606 | 7663  | 0     | 0     | 0                            | -       | 0     | 0    | 0   | Unknown                                                                                                                                                       |
| MLG 621 | 10 | 23493 | 6953  | 32360 | 66.78 | gii640845263 gb C P007727.1  | 5395263 | 52965 | 0.98 | 7   | k__Bacteria;p__Proteobacteria;c__Gammaproteobacteria;o__Enterobacteriales;f__Enterobacteriaceae;g__Klebsiella pneumoniae                                      |
| MLG 622 | 9  | 23469 | 6852  | 27322 | 57.16 | gii251817111 emb  FM252032.1 | 2146229 | 30349 | 1.41 | 34  | k__Bacteria;p__Firmicutes;c__Bacilli;o__Lactobacillales;f__Streptococcaceae;g__Streptococcus;s__Streptococcus suis                                            |

|         |     |        |        |        |       |                             |         |        |       |     |                                                                                                                                                               |
|---------|-----|--------|--------|--------|-------|-----------------------------|---------|--------|-------|-----|---------------------------------------------------------------------------------------------------------------------------------------------------------------|
| MLG 624 | 8   | 23297  | 7889   | 10410  | 22.53 | gi 282947233 emb FN543502.1 | 5346659 | 10394  | 0.19  | 266 | k__Bacteria;p__Proteobacteria;c__Gammaproteobacteria;o__Enterobacteriales;f__Enterobacteriaceae;g__Citrobacter;s__Citrobacter rodentium                       |
| MLG 625 | 20  | 23152  | 10141  | 20225  | 43.99 | gi 156530483 gb C P000783.1 | 4368373 | 20223  | 0.46  | 271 | k__Bacteria;p__Proteobacteria;c__Gammaproteobacteria;o__Enterobacteriales;f__Enterobacteriaceae;g__Cronobacter;s__Cronobacter sakazakii                       |
| MLG 627 | 4   | 23087  | 7763   | 0      | 0     | 0                           | -       | 0      | 0     | 0   | Unknow                                                                                                                                                        |
| MLG 628 | 6   | 23071  | 6865   | 0      | 0     | 0                           | -       | 0      | 0     | 0   | Unknow                                                                                                                                                        |
| MLG 629 | 5   | 22924  | 9205   | 11652  | 26.04 | gi 284919779 emb FN554766.1 | 5241977 | 17357  | 0.33  | 1   | k__Bacteria;p__Proteobacteria;c__Gammaproteobacteria;o__Enterobacteriales;f__Enterobacteriaceae;g__Escherichia;s__Escherichia coli                            |
| MLG 630 | 8   | 22884  | 4306   | 23033  | 51.49 | gi 597512677 emb FO834906.1 | 5438894 | 25138  | 0.46  | 7   | k__Bacteria;p__Proteobacteria;c__Gammaproteobacteria;o__Enterobacteriales;f__Enterobacteriaceae;g__Klebsiella;s__Klebsiella pneumoniae                        |
| MLG 632 | 26  | 22678  | 2599   | 5728   | 13.04 | gi 595607150 gb C P007394.1 | 5090442 | 6137   | 0.12  | 1   | k__Bacteria;p__Proteobacteria;c__Gammaproteobacteria;o__Enterobacteriales;f__Enterobacteriaceae;g__Escherichia;s__Escherichia coli                            |
| MLG 633 | 9   | 22318  | 3695   | 0      | 0     | 0                           | -       | 0      | 0     | 0   | Unknow                                                                                                                                                        |
| MLG 636 | 10  | 22197  | 4418   | 17866  | 41.84 | gi 281374316 gb C P001834.1 | 2598144 | 20109  | 0.77  | 88  | k__Bacteria;p__Firmicutes;c__Bacilli;o__Lactobacillales;f__Streptococcaceae;g__Lactococcus;s__Lactococcus lactis                                              |
| MLG 638 | 14  | 21751  | 4336   | 1448   | 3.51  | gi 569535620 gb C P007025.1 | 4701875 | 1448   | 0.03  | 264 | k__Bacteria;p__Proteobacteria;c__Gammaproteobacteria;o__Enterobacteriales;f__Enterobacteriaceae;g__Escherichia;s__Escherichia albertii                        |
| MLG 643 | 11  | 21531  | 4751   | 32399  | 81.39 | gi 170517292 gb C P000970.1 | 5068389 | 35008  | 0.69  | 1   | k__Bacteria;p__Proteobacteria;c__Gammaproteobacteria;o__Enterobacteriales;f__Enterobacteriaceae;g__Escherichia;s__Escherichia coli                            |
| MLG 645 | 12  | 21254  | 4729   | 0      | 0     | 0                           | -       | 0      | 0     | 0   | Unknow                                                                                                                                                        |
| MLG 108 | 127 | 639830 | 15850  | 620832 | 97.03 | gi 121504137 gb C P000538.1 | 1616554 | 623243 | 38.55 | 98  | k__Bacteria;p__Proteobacteria;c__Epsilonproteobacteria;o__Campylobacteriales;f__Campylobacteraceae;g__Campylobacter;s__Campylobacter jejuni                   |
| MLG 126 | 11  | 489826 | 176856 | 377361 | 77.04 | gi 690347849 gb C P007646.1 | 1836297 | 409956 | 22.33 | 192 | k__Bacteria;p__Firmicutes;c__Bacilli;o__Lactobacillales;f__Lactobacillaceae;g__Lactobacillus;s__Lactobacillus salivarius                                      |
| MLG 157 | 3   | 349534 | 255034 | 189339 | 54.17 | gi 341821300 emb HE576794.1 | 2474718 | 191199 | 7.73  | 651 | k__Bacteria;p__Firmicutes;c__Negativicutes;o__Selenomonadales;f__Veillonellaceae;g__Megasphaera;s__Megasphaera elsdenii                                       |
| MLG 167 | 2   | 236553 | 224182 | 0      | 0     | 0                           | -       | 0      | 0     | 0   | Unknow                                                                                                                                                        |
| MLG 190 | 4   | 205603 | 80041  | 171509 | 83.42 | gi 329666391 gb C P002464.1 | 1966342 | 175286 | 8.91  | 193 | k__Bacteria;p__Firmicutes;c__Bacilli;o__Lactobacillales;f__Lactobacillaceae;g__Lactobacillus;s__Lactobacillus johnsonii                                       |
| MLG 219 | 3   | 170347 | 68574  | 59136  | 34.72 | gi 527122546 gb C P003025.1 | 1975547 | 58491  | 2.96  | 207 | k__Bacteria;p__Firmicutes;c__Bacilli;o__Lactobacillales;f__Streptococcaceae;g__Streptococcus;s__Streptococcus lutetiensis                                     |
| MLG 267 | 4   | 143020 | 55932  | 44831  | 31.35 | gi 332341332 gb C P002729.1 | 5186416 | 44488  | 0.86  | 1   | k__Bacteria;p__Proteobacteria;c__Gammaproteobacteria;o__Enterobacteriales;f__Enterobacteriaceae;g__Escherichia;s__Escherichia coli                            |
| MLG 286 | 4   | 135485 | 59457  | 0      | 0     | 0                           | -       | 0      | 0     | 0   | Unknow                                                                                                                                                        |
| MLG 585 | 16  | 131826 | 40354  | 0      | 0     | 0                           | -       | 0      | 0     | 0   | Unknow                                                                                                                                                        |
| MLG 586 | 3   | 118269 | 106067 | 0      | 0     | 0                           | -       | 0      | 0     | 0   | Unknow                                                                                                                                                        |
| MLG 302 | 3   | 106676 | 71264  | 0      | 0     | 0                           | -       | 0      | 0     | 0   | Unknow                                                                                                                                                        |
| MLG 321 | 2   | 100268 | 96525  | 0      | 0     | 0                           | -       | 0      | 0     | 0   | Unknow                                                                                                                                                        |
| MLG 334 | 4   | 99838  | 47975  | 0      | 0     | 0                           | -       | 0      | 0     | 0   | Unknow                                                                                                                                                        |
| MLG 342 | 18  | 93044  | 12419  | 64494  | 69.32 | gi 440045023 gb C P003938.1 | 4762179 | 65299  | 1.37  | 3   | k__Bacteria;p__Proteobacteria;c__Gammaproteobacteria;o__Enterobacteriales;f__Enterobacteriaceae;g__Unclassified;s__Enterobacteriaceae bacterium strain FGI 57 |
| MLG 360 | 2   | 83764  | 77679  | 5396   | 6.44  | gi 662712225 gb C P008823.1 | 4852980 | 5894   | 0.12  | 4   | k__Bacteria;p__Proteobacteria;c__Gammaproteobacteria;o__Enterobacteriales;f__Enterobacteriaceae;g__Enterobacter;s__Enterobacter cloacae                       |

|         |    |       |       |       |       |                              |         |       |      |     |                                                                                                                                             |
|---------|----|-------|-------|-------|-------|------------------------------|---------|-------|------|-----|---------------------------------------------------------------------------------------------------------------------------------------------|
| MLG 373 | 2  | 82364 | 78819 | 55560 | 67.46 | gii569550235 gb C P003999.1  | 5307003 | 34691 | 0.65 | 7   | k__Bacteria;p__Proteobacteria;c__Gammaproteobacteria;o__Enterobacteriales;f__Enterobacteriaceae;g__Klebsiella;s__Klebsiella pneumoniae      |
| MLG 374 | 5  | 80581 | 46682 | 0     | 0     | 0                            | -       | 0     | 0    | 0   | Unknow                                                                                                                                      |
| MLG 594 | 2  | 78099 | 39448 | 0     | 0     | 0                            | -       | 0     | 0    | 0   | Unknow                                                                                                                                      |
| MLG 403 | 3  | 77176 | 41828 | 18397 | 23.84 | gii383101383 gb C P002291.1  | 4935294 | 27974 | 0.57 | 1   | k__Bacteria;p__Proteobacteria;c__Gammaproteobacteria;o__Enterobacteriales;f__Enterobacteriaceae;g__Escherichia;s__Escherichia coli          |
| MLG 408 | 4  | 74369 | 26898 | 0     | 0     | 0                            | -       | 0     | 0    | 0   | Unknow                                                                                                                                      |
| MLG 417 | 3  | 73436 | 67087 | 45167 | 61.51 | gii116094265 gb C P000413.1  | 1894360 | 64978 | 3.43 | 384 | k__Bacteria;p__Firmicutes;c__Bacilli;o__Lactobacillales;f__Lactobacillaceae;g__Lactobacillus;s__Lactobacillus gasserii                      |
| MLG 423 | 5  | 68926 | 27767 | 0     | 0     | 0                            | -       | 0     | 0    | 0   | Unknow                                                                                                                                      |
| MLG 429 | 2  | 67215 | 33856 | 64152 | 95.44 | gii356601232 gb C P002797.2  | 4971461 | 33807 | 0.68 | 1   | k__Bacteria;p__Proteobacteria;c__Gammaproteobacteria;o__Enterobacteriales;f__Enterobacteriaceae;g__Escherichia;s__Escherichia coli          |
| MLG 439 | 3  | 66072 | 35463 | 44000 | 66.59 | gii695172424 gb C P008929.1  | 5317001 | 36670 | 0.69 | 7   | k__Bacteria;p__Proteobacteria;c__Gammaproteobacteria;o__Enterobacteriales;f__Enterobacteriaceae;g__Klebsiella;s__Klebsiella pneumoniae      |
| MLG 445 | 2  | 64529 | 61426 | 3002  | 4.65  | gii169752989 gb C P000946.1  | 4746218 | 5141  | 0.11 | 1   | k__Bacteria;p__Proteobacteria;c__Gammaproteobacteria;o__Enterobacteriales;f__Enterobacteriaceae;g__Escherichia;s__Escherichia coli          |
| MLG 456 | 3  | 62544 | 38821 | 30870 | 49.36 | gii365906294 gb C P003218.1  | 5974109 | 31062 | 0.52 | 12  | k__Bacteria;p__Proteobacteria;c__Gammaproteobacteria;o__Enterobacteriales;f__Enterobacteriaceae;g__Klebsiella;s__Klebsiella oxytoca         |
| MLG 461 | 2  | 61896 | 59655 | 1488  | 2.4   | gii603129120 gb C P007332.1  | 4807994 | 1488  | 0.03 | 5   | k__Bacteria;p__Proteobacteria;c__Gammaproteobacteria;o__Enterobacteriales;f__Enterobacteriaceae;g__Salmonella;s__Salmonella enterica        |
| MLG 462 | 2  | 58793 | 35078 | 42396 | 72.11 | gii582030173 gb C P006659.1  | 5435369 | 44612 | 0.82 | 7   | k__Bacteria;p__Proteobacteria;c__Gammaproteobacteria;o__Enterobacteriales;f__Enterobacteriaceae;g__Klebsiella;s__Klebsiella pneumoniae      |
| MLG 605 | 2  | 58620 | 34688 | 0     | 0     | 0                            | -       | 0     | 0    | 0   | Unknow                                                                                                                                      |
| MLG 475 | 3  | 57415 | 31061 | 18078 | 31.49 | gii339759707 gb C P002910.1  | 5259571 | 18992 | 0.36 | 7   | k__Bacteria;p__Proteobacteria;c__Gammaproteobacteria;o__Enterobacteriales;f__Enterobacteriaceae;g__Klebsiella;s__Klebsiella pneumoniae      |
| MLG 607 | 3  | 56264 | 42056 | 12767 | 22.69 | gii365906294 gb C P003218.1  | 5974109 | 12864 | 0.22 | 12  | k__Bacteria;p__Proteobacteria;c__Gammaproteobacteria;o__Enterobacteriales;f__Enterobacteriaceae;g__Klebsiella;s__Klebsiella oxytoca         |
| MLG 608 | 2  | 55962 | 41016 | 0     | 0     | 0                            | -       | 0     | 0    | 0   | Unknow                                                                                                                                      |
| MLG 476 | 3  | 55055 | 32945 | 3502  | 6.36  | gii675820319 emb  LM996882.1 | 1086344 | 3491  | 0.32 | 1   | k__Bacteria;p__Proteobacteria;c__Gammaproteobacteria;o__Enterobacteriales;f__Enterobacteriaceae;g__Escherichia;s__Escherichia coli          |
| MLG 485 | 2  | 54538 | 48232 | 0     | 0     | 0                            | -       | 0     | 0    | 0   | Unknow                                                                                                                                      |
| MLG 497 | 3  | 53898 | 45217 | 22115 | 41.03 | gii660577155 gb C P008797.1  | 5396164 | 24904 | 0.46 | 7   | k__Bacteria;p__Proteobacteria;c__Gammaproteobacteria;o__Enterobacteriales;f__Enterobacteriaceae;g__Klebsiella;s__Klebsiella pneumoniae      |
| MLG 510 | 2  | 53850 | 29984 | 0     | 0     | 0                            | -       | 0     | 0    | 0   | Unknow                                                                                                                                      |
| MLG 613 | 12 | 52698 | 8150  | 48733 | 92.48 | gii122087364 emb  AM286415.1 | 4615899 | 65400 | 1.42 | 296 | k__Bacteria;p__Proteobacteria;c__Gammaproteobacteria;o__Enterobacteriales;f__Enterobacteriaceae;g__Yersinia;s__Yersinia enterocolitica      |
| MLG 518 | 2  | 52095 | 40224 | 0     | 0     | 0                            | -       | 0     | 0    | 0   | Unknow                                                                                                                                      |
| MLG 615 | 2  | 51620 | 50977 | 0     | 0     | 0                            | -       | 0     | 0    | 0   | Unknow                                                                                                                                      |
| MLG 523 | 7  | 51348 | 13059 | 19489 | 37.95 | gii341821300 emb  HE576794.1 | 2474718 | 19496 | 0.79 | 651 | k__Bacteria;p__Firmicutes;c__Negativicutes;o__Selenomonadales;f__Veillonellaceae;g__Megasphaera;s__Megasphaera elsdenii                     |
| MLG 524 | 3  | 50922 | 29231 | 50667 | 99.5  | gii569535620 gb C P007025.1  | 4701875 | 53428 | 1.14 | 264 | k__Bacteria;p__Proteobacteria;c__Gammaproteobacteria;o__Enterobacteriales;f__Enterobacteriaceae;g__Escherichia;s__Escherichia albertii      |
| MLG 530 | 17 | 50565 | 15406 | 849   | 1.68  | gii121504137 gb C P000538.1  | 1616554 | 857   | 0.05 | 98  | k__Bacteria;p__Proteobacteria;c__Epsilonproteobacteria;o__Campylobacteriales;f__Campylobacteraceae;g__Campylobacter;s__Campylobacter jejuni |

|         |    |       |       |       |       |                              |          |       |      |      |                                                                                                                                             |
|---------|----|-------|-------|-------|-------|------------------------------|----------|-------|------|------|---------------------------------------------------------------------------------------------------------------------------------------------|
| MLG 539 | 5  | 50292 | 16569 | 0     | 0     | 0                            | -        | 0     | 0    | 0    | Unknown                                                                                                                                     |
| MLG 620 | 3  | 48655 | 41474 | 48353 | 99.38 | gii526120653 gb C P006603.1  | 21454 45 | 55793 | 2.6  | 367  | k__Bacteria;p__Firmicutes;c__Bacilli;o__Lactobacillales;f__Lactobacillaceae;g__Lactobacillus;s__Lactobacillus reuteri                       |
| MLG 541 | 2  | 48460 | 37279 | 32360 | 66.78 | gii640845263 gb C P007727.1  | 53952 63 | 52965 | 0.98 | 7    | k__Bacteria;p__Proteobacteria;c__Gammaproteobacteria;o__Enterobacteriales;f__Enterobacteriaceae;g__Klebsiella;a__Klebsiella pneumoniae      |
| MLG 542 | 2  | 47800 | 26010 | 27322 | 57.16 | gii251817111 emb  FM252032.1 | 21462 29 | 30349 | 1.41 | 34   | k__Bacteria;p__Firmicutes;c__Bacilli;o__Lactobacillales;f__Streptococcaceae;g__Streptococcus;s__Streptococcus suis                          |
| MLG 623 | 15 | 47744 | 16154 | 5005  | 10.48 | gii408667903 gb C P003871.2  | 16352 52 | 5277  | 0.32 | 98   | k__Bacteria;p__Proteobacteria;c__Epsilonproteobacteria;o__Campylobacteriales;f__Campylobacteraceae;g__Campylobacter;s__Campylobacter jejuni |
| MLG 546 | 5  | 46214 | 18029 | 10410 | 22.53 | gii282947233 emb  FN543502.1 | 53466 59 | 10394 | 0.19 | 266  | k__Bacteria;p__Proteobacteria;c__Gammaproteobacteria;o__Enterobacteriales;f__Enterobacteriaceae;g__Citrobacter;s__Citrobacter rodentium     |
| MLG 548 | 2  | 45973 | 35762 | 20225 | 43.99 | gii156530483 gb C P000783.1  | 43683 73 | 20223 | 0.46 | 271  | k__Bacteria;p__Proteobacteria;c__Gammaproteobacteria;o__Enterobacteriales;f__Enterobacteriaceae;g__Cronobacter;s__Cronobacter sakazakii     |
| MLG 626 | 2  | 45775 | 28398 | 45775 | 100   | gii110341805 gb C P000247.1  | 49389 20 | 48381 | 0.98 | 1    | k__Bacteria;p__Proteobacteria;c__Gammaproteobacteria;o__Enterobacteriales;f__Enterobacteriaceae;g__Escherichia;s__Escherichia coli          |
| MLG 553 | 2  | 45351 | 38956 | 0     | 0     | 0                            | -        | 0     | 0    | 0    | Unknown                                                                                                                                     |
| MLG 559 | 3  | 45189 | 31048 | 0     | 0     | 0                            | -        | 0     | 0    | 0    | Unknown                                                                                                                                     |
| MLG 560 | 2  | 44741 | 23285 | 11652 | 26.04 | gii284919779 emb  FN54766.1  | 52419 77 | 17357 | 0.33 | 1    | k__Bacteria;p__Proteobacteria;c__Gammaproteobacteria;o__Enterobacteriales;f__Enterobacteriaceae;g__Escherichia;s__Escherichia coli          |
| MLG 561 | 2  | 44733 | 25195 | 23033 | 51.49 | gii597512677 emb  FO834906.1 | 54388 94 | 25138 | 0.46 | 7    | k__Bacteria;p__Proteobacteria;c__Gammaproteobacteria;o__Enterobacteriales;f__Enterobacteriaceae;g__Klebsiella;a__Klebsiella pneumoniae      |
| MLG 631 | 3  | 44203 | 28349 | 28357 | 64.15 | gii674133359 gb C P009208.1  | 53748 34 | 28399 | 0.53 | 7    | k__Bacteria;p__Proteobacteria;c__Gammaproteobacteria;o__Enterobacteriales;f__Enterobacteriaceae;g__Klebsiella;a__Klebsiella pneumoniae      |
| MLG 563 | 4  | 43925 | 18920 | 5728  | 13.04 | gii595607150 gb C P007394.1  | 50904 42 | 6137  | 0.12 | 1    | k__Bacteria;p__Proteobacteria;c__Gammaproteobacteria;o__Enterobacteriales;f__Enterobacteriaceae;g__Escherichia;s__Escherichia coli          |
| MLG 568 | 2  | 43754 | 42067 | 0     | 0     | 0                            | -        | 0     | 0    | 0    | Unknown                                                                                                                                     |
| MLG 634 | 2  | 42988 | 42303 | 685   | 1.59  | gii526125113 gb C P006608.1  | 46835 51 | 685   | 0.01 | 13   | k__Bacteria;p__Proteobacteria;c__Gammaproteobacteria;o__Enterobacteriales;f__Enterobacteriaceae;g__Salmonella;s__Salmonella bongori         |
| MLG 635 | 3  | 42744 | 39109 | 22741 | 53.2  | gii660567586 gb C P008788.1  | 61521 90 | 23396 | 0.38 | 12   | k__Bacteria;p__Proteobacteria;c__Gammaproteobacteria;o__Enterobacteriales;f__Enterobacteriaceae;g__Klebsiella;a__Klebsiella oxytoca         |
| MLG 571 | 6  | 42700 | 29991 | 17866 | 41.84 | gii281374316 gb C P001834.1  | 25981 44 | 20109 | 0.77 | 88   | k__Bacteria;p__Firmicutes;c__Bacilli;o__Lactobacillales;f__Streptococcaceae;g__Lactococcus;s__Lactococcus lactis                            |
| MLG 637 | 6  | 41970 | 33468 | 23022 | 54.85 | gii675819096 emb  LM995659.1 | 12361 24 | 23019 | 1.86 | 1    | k__Bacteria;p__Proteobacteria;c__Gammaproteobacteria;o__Enterobacteriales;f__Enterobacteriaceae;g__Escherichia;s__Escherichia coli          |
| MLG 572 | 2  | 41204 | 38043 | 1448  | 3.51  | gii569535620 gb C P007025.1  | 47018 75 | 1448  | 0.03 | 264  | k__Bacteria;p__Proteobacteria;c__Gammaproteobacteria;o__Enterobacteriales;f__Enterobacteriaceae;g__Escherichia;s__Escherichia albertii      |
| MLG 639 | 10 | 41161 | 7205  | 14758 | 35.85 | gii537637238 gb C P003909.1  | 22336 40 | 16493 | 0.74 | 1170 | k__Bacteria;p__Proteobacteria;c__Betaproteobacteria;o__Neisseriales;f__Neisseriaceae;g__Neisseria;s__Neisseria gonorrhoeae                  |
| MLG 640 | 5  | 41138 | 17839 | 0     | 0     | 0                            | -        | 0     | 0    | 0    | Unknown                                                                                                                                     |
| MLG 641 | 3  | 40793 | 36371 | 14692 | 36.02 | gii443419838 gb C P004009.1  | 47984 35 | 24705 | 0.51 | 1    | k__Bacteria;p__Proteobacteria;c__Gammaproteobacteria;o__Enterobacteriales;f__Enterobacteriaceae;g__Escherichia;s__Escherichia coli          |
| MLG 642 | 7  | 40054 | 20129 | 24269 | 60.59 | gii666899293 gb C P008921.1  | 22923 60 | 42898 | 1.87 | 34   | k__Bacteria;p__Firmicutes;c__Bacilli;o__Lactobacillales;f__Streptococcaceae;g__Streptococcus;s__Streptococcus suis                          |
| MLG 574 | 2  | 39806 | 30738 | 32399 | 81.39 | gii170517292 gb C P000970.1  | 50683 89 | 35008 | 0.69 | 1    | k__Bacteria;p__Proteobacteria;c__Gammaproteobacteria;o__Enterobacteriales;f__Enterobacteriaceae;g__Escherichia;s__Escherichia coli          |
| MLG 644 | 2  | 39505 | 25311 | 23199 | 58.72 | gii407051884 gb C P003289.1  | 52730 97 | 29111 | 0.55 | 1    | k__Bacteria;p__Proteobacteria;c__Gammaproteobacteria;o__Enterobacteriales;f__Enterobacteriaceae;g__Escherichia;s__Escherichia coli          |
| MLG 576 | 2  | 39376 | 34303 | 0     | 0     | 0                            | -        | 0     | 0    | 0    | Unknown                                                                                                                                     |



|         |    |       |       |       |       |                              |          |       |      |     |                                                                                                                                            |
|---------|----|-------|-------|-------|-------|------------------------------|----------|-------|------|-----|--------------------------------------------------------------------------------------------------------------------------------------------|
| MLG 646 | 5  | 38589 | 12678 | 0     | 0     | 0                            | -        | 0     | 0    | 0   | Unknow                                                                                                                                     |
| MLG 647 | 2  | 38573 | 29271 | 0     | 0     | 0                            | -        | 0     | 0    | 0   | Unknow                                                                                                                                     |
| MLG 648 | 3  | 38408 | 26397 | 23344 | 60.78 | gii601101465 gb C P007505.1  | 48644 10 | 23336 | 0.48 | 5   | k__Bacteria;p__Proteobacteria;c__Gammaproteobacteria;o__Enterobacteriales;f__Enterobacteriaceae;g__Salmonella;s__Salmonella enterica       |
| MLG 649 | 2  | 37616 | 28444 | 19761 | 52.53 | gii657146798 gb C P006692.1  | 43945 00 | 21096 | 0.48 | 13  | k__Bacteria;p__Proteobacteria;c__Gammaproteobacteria;o__Enterobacteriales;f__Enterobacteriaceae;g__Salmonella;s__Salmonella bongori        |
| MLG 650 | 5  | 37290 | 14064 | 0     | 0     | 0                            | -        | 0     | 0    | 0   | Unknow                                                                                                                                     |
| MLG 651 | 3  | 37207 | 19854 | 0     | 0     | 0                            | -        | 0     | 0    | 0   | Unknow                                                                                                                                     |
| MLG 652 | 2  | 37142 | 26645 | 17639 | 47.49 | gii290760697 gb C P001846.1  | 53863 52 | 17624 | 0.33 | 1   | k__Bacteria;p__Proteobacteria;c__Gammaproteobacteria;o__Enterobacteriales;f__Enterobacteriaceae;g__Escherichia;s__Escherichia coli         |
| MLG 653 | 2  | 36939 | 19873 | 12462 | 33.74 | gii480474683 gb C P004142.1  | 53981 51 | 12548 | 0.23 | 14  | k__Bacteria;p__Proteobacteria;c__Gammaproteobacteria;o__Enterobacteriales;f__Enterobacteriaceae;g__Raoultella;a__Raoultella omithinolytica |
| MLG 654 | 2  | 36660 | 29599 | 0     | 0     | 0                            | -        | 0     | 0    | 0   | Unknow                                                                                                                                     |
| MLG 655 | 3  | 36461 | 18814 | 0     | 0     | 0                            | -        | 0     | 0    | 0   | Unknow                                                                                                                                     |
| MLG 656 | 5  | 36434 | 23181 | 7458  | 20.47 | gii339759707 gb C P002910.1  | 52595 71 | 7669  | 0.15 | 7   | k__Bacteria;p__Proteobacteria;c__Gammaproteobacteria;o__Enterobacteriales;f__Enterobacteriaceae;g__Klebsiella;a__Klebsiella pneumoniae     |
| MLG 657 | 2  | 35493 | 33315 | 35493 | 100   | gii334732565 gb C P002824.1  | 52803 50 | 35656 | 0.68 | 15  | k__Bacteria;p__Proteobacteria;c__Gammaproteobacteria;o__Enterobacteriales;f__Enterobacteriaceae;g__Enterobacter;s__Enterobacter aerogenes  |
| MLG 658 | 2  | 35448 | 19562 | 0     | 0     | 0                            | -        | 0     | 0    | 0   | Unknow                                                                                                                                     |
| MLG 659 | 2  | 35366 | 22247 | 33527 | 94.8  | gii595597955 gb C P007392.1  | 50545 09 | 33728 | 0.67 | 1   | k__Bacteria;p__Proteobacteria;c__Gammaproteobacteria;o__Enterobacteriales;f__Enterobacteriaceae;g__Escherichia;s__Escherichia coli         |
| MLG 660 | 2  | 35124 | 19554 | 0     | 0     | 0                            | -        | 0     | 0    | 0   | Unknow                                                                                                                                     |
| MLG 661 | 2  | 35016 | 33743 | 20011 | 57.15 | gii595620023 gb C P006918.1  | 52933 01 | 20029 | 0.38 | 7   | k__Bacteria;p__Proteobacteria;c__Gammaproteobacteria;o__Enterobacteriales;f__Enterobacteriaceae;g__Klebsiella;a__Klebsiella pneumoniae     |
| MLG 662 | 12 | 34962 | 17071 | 23034 | 65.88 | gii291482100 emb  FN665653.1 | 40477 29 | 24213 | 0.6  | 22  | k__Bacteria;p__Firmicutes;c__Clostridia;o__Clostridiales;f__Peptostreptococcaceae;g__Peptoclostridium;s__Peptoclostridium difficile        |
| MLG 663 | 2  | 34603 | 29495 | 29495 | 85.24 | gii392334715 gb C P003504.1  | 28277 41 | 30007 | 1.06 | 108 | k__Bacteria;p__Firmicutes;c__Bacilli;o__Lactobacillales;f__Enterococcaceae;g__Enterococcus;s__Enterococcus hirae                           |
| MLG 664 | 3  | 34423 | 20560 | 0     | 0     | 0                            | -        | 0     | 0    | 0   | Unknow                                                                                                                                     |
| MLG 665 | 33 | 34304 | 3403  | 0     | 0     | 0                            | -        | 0     | 0    | 0   | Unknow                                                                                                                                     |
| MLG 666 | 2  | 34004 | 31927 | 32087 | 94.36 | gii315059226 gb C P002185.1  | 49009 68 | 30561 | 0.62 | 1   | k__Bacteria;p__Proteobacteria;c__Gammaproteobacteria;o__Enterobacteriales;f__Enterobacteriaceae;g__Escherichia;s__Escherichia coli         |
| MLG 667 | 2  | 33652 | 27162 | 23030 | 68.44 | gii315059226 gb C P002185.1  | 49009 68 | 23021 | 0.47 | 1   | k__Bacteria;p__Proteobacteria;c__Gammaproteobacteria;o__Enterobacteriales;f__Enterobacteriaceae;g__Escherichia;s__Escherichia coli         |
| MLG 668 | 2  | 33384 | 31333 | 17840 | 53.44 | gii115511419 gb C P000468.1  | 50820 25 | 17860 | 0.35 | 1   | k__Bacteria;p__Proteobacteria;c__Gammaproteobacteria;o__Enterobacteriales;f__Enterobacteriaceae;g__Escherichia;s__Escherichia coli         |
| MLG 669 | 8  | 33324 | 8027  | 0     | 0     | 0                            | -        | 0     | 0    | 0   | Unknow                                                                                                                                     |
| MLG 670 | 2  | 33252 | 18982 | 29848 | 89.76 | gii443419838 gb C P004009.1  | 47984 35 | 37024 | 0.77 | 1   | k__Bacteria;p__Proteobacteria;c__Gammaproteobacteria;o__Enterobacteriales;f__Enterobacteriaceae;g__Escherichia;s__Escherichia coli         |
| MLG 671 | 2  | 33109 | 26915 | 0     | 0     | 0                            | -        | 0     | 0    | 0   | Unknow                                                                                                                                     |
| MLG 672 | 4  | 33015 | 23420 | 31665 | 95.91 | gii284919779 emb  FN554766.1 | 52419 77 | 31665 | 0.6  | 1   | k__Bacteria;p__Proteobacteria;c__Gammaproteobacteria;o__Enterobacteriales;f__Enterobacteriaceae;g__Escherichia;s__Escherichia coli         |

|         |    |       |       |       |       |                              |         |       |      |      |                                                                                                                                               |
|---------|----|-------|-------|-------|-------|------------------------------|---------|-------|------|------|-----------------------------------------------------------------------------------------------------------------------------------------------|
| MLG 673 | 3  | 32780 | 12866 | 30729 | 93.74 | gii215263233 emb FM180568.1  | 4965553 | 31024 | 0.62 | 1    | k__Bacteria;p__Proteobacteria;c__Gammaproteobacteria;o__Enterobacteriales;f__Enterobacteriaceae;g__Escherichia;s__Escherichia coli            |
| MLG 674 | 5  | 32020 | 8380  | 31717 | 99.05 | gii295089810 emb FP929037.1  | 3769775 | 31713 | 0.84 | 843  | k__Bacteria;p__Firmicutes;c__Clostridia;o__Clostridiales;f__Lachnospiraceae;g__Lachnoclostridium;s__Clostridium)saccharolyticum               |
| MLG 675 | 3  | 32000 | 20895 | 5042  | 15.76 | gii671341910 gb C P007443.1  | 2203222 | 5341  | 0.24 | 893  | k__Bacteria;p__Actinobacteria;c__Actinobacteria;o__Bifidobacteriales;f__Bifidobacteriaceae;g__Bifidobacterium;s__Bifidobacterium adolescentis |
| MLG 676 | 2  | 31874 | 23454 | 29736 | 93.29 | gii365906294 gb C P003218.1  | 5974109 | 29937 | 0.5  | 12   | k__Bacteria;p__Proteobacteria;c__Gammaproteobacteria;o__Enterobacteriales;f__Enterobacteriaceae;g__Klebsiella;s__Klebsiella oxytoca           |
| MLG 677 | 4  | 31548 | 15201 | 27738 | 87.92 | gii527122546 gb C P003025.1  | 1975547 | 27730 | 1.4  | 207  | k__Bacteria;p__Firmicutes;c__Bacilli;o__Lactobacillales;f__Streptococcaceae;g__Streptococcus;s__Streptococcus lutetiensis                     |
| MLG 678 | 3  | 31463 | 20927 | 342   | 1.09  | gii589630713 gb C P001220.2  | 5373644 | 342   | 0.01 | 1008 | k__Bacteria;p__Proteobacteria;c__Betaproteobacteria;o__Burkholderiales;f__Comamonadaceae;g__Comamonas;s__Comamonas testosteroni               |
| MLG 679 | 2  | 31155 | 28291 | 20403 | 65.49 | gii345283481 gb C P003032.1  | 2066652 | 20350 | 0.98 | 370  | k__Bacteria;p__Firmicutes;c__Bacilli;o__Lactobacillales;f__Lactobacillaceae;g__Lactobacillus;s__Lactobacillus ruminis                         |
| MLG 680 | 2  | 30951 | 22962 | 24677 | 79.73 | gii323128316 gb C P002487.1  | 4878013 | 24842 | 0.51 | 5    | k__Bacteria;p__Proteobacteria;c__Gammaproteobacteria;o__Enterobacteriales;f__Enterobacteriaceae;g__Salmonella;s__Salmonella enterica          |
| MLG 681 | 2  | 30929 | 23597 | 0     | 0     | 0                            | -       | 0     | 0    | 0    | Unknow                                                                                                                                        |
| MLG 682 | 2  | 30544 | 20300 | 30048 | 98.38 | gii218368405 emb C U928164.2 | 5132068 | 30482 | 0.59 | 1    | k__Bacteria;p__Proteobacteria;c__Gammaproteobacteria;o__Enterobacteriales;f__Enterobacteriaceae;g__Escherichia;s__Escherichia coli            |
| MLG 683 | 2  | 30437 | 22016 | 3076  | 10.11 | gii573019581 gb C P006569.1  | 4709528 | 3079  | 0.07 | 302  | k__Bacteria;p__Proteobacteria;c__Gammaproteobacteria;o__Enterobacteriales;f__Enterobacteriaceae;g__Sodalis;s__Sodalis sp. HS1                 |
| MLG 684 | 2  | 30417 | 29648 | 18557 | 61.01 | gii374681091 gb C P003295.1  | 1988420 | 18736 | 0.94 | 228  | k__Bacteria;p__Firmicutes;c__Bacilli;o__Lactobacillales;f__Streptococcaceae;g__Streptococcus;s__Streptococcus infantarius                     |
| MLG 685 | 3  | 30416 | 24766 | 923   | 3.03  | gii455418716 gb C P004345.1  | 3799539 | 919   | 0.02 | 301  | k__Bacteria;p__Proteobacteria;c__Gammaproteobacteria;o__Enterobacteriales;f__Enterobacteriaceae;g__Morganelle;s__Morganelle morganii          |
| MLG 686 | 5  | 30404 | 28155 | 383   | 1.26  | gii326539903 gb C P002582.1  | 4714237 | 383   | 0.01 | 51   | k__Bacteria;p__Firmicutes;c__Clostridia;o__Clostridiales;f__Lachnospiraceae;g__Cellulosilyticum;s__Cellulosilyticum lentocellum               |
| MLG 687 | 2  | 30398 | 22520 | 7314  | 24.06 | gii571260215 emb HF571988.1  | 4940199 | 8376  | 0.17 | 296  | k__Bacteria;p__Proteobacteria;c__Gammaproteobacteria;o__Enterobacteriales;f__Enterobacteriaceae;g__Yersinia;s__Yersinia enterocolitica        |
| MLG 688 | 5  | 30313 | 16252 | 30306 | 99.98 | gii402539130 gb C P003785.1  | 5386705 | 29907 | 0.56 | 7    | k__Bacteria;p__Proteobacteria;c__Gammaproteobacteria;o__Enterobacteriales;f__Enterobacteriaceae;g__Klebsiella;s__Klebsiella pneumoniae        |
| MLG 689 | 3  | 29794 | 11637 | 0     | 0     | 0                            | -       | 0     | 0    | 0    | Unknow                                                                                                                                        |
| MLG 690 | 5  | 29672 | 11339 | 24072 | 81.13 | gii218430358 emb C U928163.2 | 5202090 | 16631 | 0.32 | 1    | k__Bacteria;p__Proteobacteria;c__Gammaproteobacteria;o__Enterobacteriales;f__Enterobacteriaceae;g__Escherichia;s__Escherichia coli            |
| MLG 691 | 2  | 29397 | 24502 | 24784 | 84.31 | gii374269796 emb HE616528.1  | 4988504 | 22486 | 0.45 | 262  | k__Bacteria;p__Proteobacteria;c__Gammaproteobacteria;o__Enterobacteriales;f__Enterobacteriaceae;g__Shigella;s__Shigella sonnei                |
| MLG 692 | 2  | 29141 | 16069 | 29118 | 99.92 | gii170517292 gb C P000970.1  | 5068389 | 23555 | 0.46 | 1    | k__Bacteria;p__Proteobacteria;c__Gammaproteobacteria;o__Enterobacteriales;f__Enterobacteriaceae;g__Escherichia;s__Escherichia coli            |
| MLG 693 | 12 | 28983 | 5869  | 8577  | 29.59 | gii526120653 gb C P006603.1  | 2145445 | 10156 | 0.47 | 367  | k__Bacteria;p__Firmicutes;c__Bacilli;o__Lactobacillales;f__Lactobacillaceae;g__Lactobacillus;s__Lactobacillus reuteri                         |
| MLG 694 | 2  | 28764 | 23722 | 28623 | 99.51 | gii218368405 emb C U928164.2 | 5132068 | 29893 | 0.58 | 1    | k__Bacteria;p__Proteobacteria;c__Gammaproteobacteria;o__Enterobacteriales;f__Enterobacteriaceae;g__Escherichia;s__Escherichia coli            |
| MLG 695 | 4  | 28688 | 11661 | 12233 | 42.64 | gii194405610 gb C P001120.1  | 4888768 | 12243 | 0.25 | 5    | k__Bacteria;p__Proteobacteria;c__Gammaproteobacteria;o__Enterobacteriales;f__Enterobacteriaceae;g__Salmonella;s__Salmonella enterica          |
| MLG 696 | 10 | 28451 | 18337 | 7209  | 25.34 | gii584454940 emb HG917868.1  | 2917864 | 7215  | 0.25 | 36   | k__Bacteria;p__Firmicutes;c__Clostridia;o__Clostridiales;f__Clostridiaceae;g__Clostridium;s__Clostridium sp. M2/40                            |
| MLG 697 | 8  | 28400 | 6580  | 0     | 0     | 0                            | -       | 0     | 0    | 0    | Unknow                                                                                                                                        |
| MLG 698 | 3  | 28284 | 13557 | 11810 | 41.76 | gii612156087 gb C P004887.1  | 5914407 | 11967 | 0.2  | 12   | k__Bacteria;p__Proteobacteria;c__Gammaproteobacteria;o__Enterobacteriales;f__Enterobacteriaceae;g__Klebsiella;s__Klebsiella oxytoca           |
| MLG 699 | 2  | 28072 | 20303 | 25192 | 89.74 | gii295095013 emb FP929040.1  | 4908759 | 25186 | 0.51 | 4    | k__Bacteria;p__Proteobacteria;c__Gammaproteobacteria;o__Enterobacteriales;f__Enterobacteriaceae;g__Enterobacter;s__Enterobacter cloacae       |

|         |    |       |       |       |       |                                 |             |       |      |     |                                                                                                                                          |
|---------|----|-------|-------|-------|-------|---------------------------------|-------------|-------|------|-----|------------------------------------------------------------------------------------------------------------------------------------------|
| MLG 700 | 15 | 27995 | 5435  | 0     | 0     | 0                               | -           | 0     | 0    | 0   | Unknown                                                                                                                                  |
| MLG 701 | 2  | 27733 | 25699 | 19805 | 71.41 | gii315059226 gb C<br>P002185.1  | 49009<br>68 | 19807 | 0.4  | 1   | k__Bacteria;p__Proteobacteria;c__Gammaproteobacteria;o__Enterobacteriales;f__Enterobacteriaceae;g__Escherichia;s__Escherichia coli       |
| MLG 702 | 2  | 27724 | 19292 | 0     | 0     | 0                               | -           | 0     | 0    | 0   | Unknown                                                                                                                                  |
| MLG 703 | 2  | 27672 | 21437 | 2561  | 9.25  | gii84778498 dbj A<br>P008232.1  | 41711<br>46 | 2705  | 0.06 | 304 | k__Bacteria;p__Proteobacteria;c__Gammaproteobacteria;o__Enterobacteriales;f__Enterobacteriaceae;g__Sodalis;s__Sodalis glossinidius       |
| MLG 704 | 2  | 27543 | 14945 | 0     | 0     | 0                               | -           | 0     | 0    | 0   | Unknown                                                                                                                                  |
| MLG 705 | 2  | 27391 | 26360 | 0     | 0     | 0                               | -           | 0     | 0    | 0   | Unknown                                                                                                                                  |
| MLG 706 | 6  | 27148 | 8214  | 15711 | 57.87 | gii170517292 gb C<br>P000970.1  | 50683<br>89 | 15711 | 0.31 | 1   | k__Bacteria;p__Proteobacteria;c__Gammaproteobacteria;o__Enterobacteriales;f__Enterobacteriaceae;g__Escherichia;s__Escherichia coli       |
| MLG 707 | 2  | 27077 | 25915 | 19460 | 71.87 | gii409033099 gb C<br>P001600.2  | 38123<br>01 | 20014 | 0.52 | 297 | k__Bacteria;p__Proteobacteria;c__Gammaproteobacteria;o__Enterobacteriales;f__Enterobacteriaceae;g__Edwardsiella;s__Edwardsiella ictaluri |
| MLG 708 | 2  | 26938 | 19571 | 18613 | 69.1  | gii595583568 gb C<br>P007265.1  | 47586<br>29 | 13633 | 0.29 | 1   | k__Bacteria;p__Proteobacteria;c__Gammaproteobacteria;o__Enterobacteriales;f__Enterobacteriaceae;g__Escherichia;s__Escherichia coli       |
| MLG 709 | 2  | 26664 | 25082 | 26664 | 100   | gii157076741 gb C<br>P000800.1  | 49796<br>19 | 26658 | 0.54 | 1   | k__Bacteria;p__Proteobacteria;c__Gammaproteobacteria;o__Enterobacteriales;f__Enterobacteriaceae;g__Escherichia;s__Escherichia coli       |
| MLG 710 | 3  | 26632 | 17056 | 14963 | 56.18 | gii526125113 gb C<br>P006608.1  | 46835<br>51 | 15086 | 0.32 | 13  | k__Bacteria;p__Proteobacteria;c__Gammaproteobacteria;o__Enterobacteriales;f__Enterobacteriaceae;g__Salmonella;s__Salmonella bongori      |
| MLG 711 | 3  | 26272 | 12467 | 22056 | 83.95 | gii605511148 gb C<br>P007530.1  | 46943<br>75 | 16108 | 0.34 | 5   | k__Bacteria;p__Proteobacteria;c__Gammaproteobacteria;o__Enterobacteriales;f__Enterobacteriaceae;g__Salmonella;s__Salmonella enterica     |
| MLG 712 | 2  | 26188 | 25634 | 26089 | 99.62 | gii394343076 gb C<br>P003683.1  | 60970<br>32 | 29840 | 0.49 | 12  | k__Bacteria;p__Proteobacteria;c__Gammaproteobacteria;o__Enterobacteriales;f__Enterobacteriaceae;g__Klebsiella;s__Klebsiella oxytoca      |
| MLG 713 | 3  | 26043 | 13788 | 18734 | 71.93 | gii612150118 gb C<br>P007546.1  | 45619<br>05 | 18730 | 0.41 | 9   | k__Bacteria;p__Proteobacteria;c__Gammaproteobacteria;o__Enterobacteriales;f__Enterobacteriaceae;g__Enterobacter;s__Enterobacter asburiae |
| MLG 714 | 3  | 25859 | 12771 | 0     | 0     | 0                               | -           | 0     | 0    | 0   | Unknown                                                                                                                                  |
| MLG 715 | 4  | 25646 | 18480 | 12340 | 48.12 | gii116094265 gb C<br>P000413.1  | 18943<br>60 | 13374 | 0.71 | 384 | k__Bacteria;p__Firmicutes;c__Bacilli;o__Lactobacillales;f__Lactobacillaceae;g__Lactobacillus;s__Lactobacillus gasseri                    |
| MLG 716 | 3  | 24404 | 14150 | 12865 | 52.72 | gii512154926 gb C<br>P006011.1  | 19477<br>06 | 13649 | 0.7  | 367 | k__Bacteria;p__Firmicutes;c__Bacilli;o__Lactobacillales;f__Lactobacillaceae;g__Lactobacillus;s__Lactobacillus reuteri                    |
| MLG 717 | 2  | 24379 | 24075 | 243   | 1     | gii526120653 gb C<br>P006603.1  | 21454<br>45 | 245   | 0.01 | 367 | k__Bacteria;p__Firmicutes;c__Bacilli;o__Lactobacillales;f__Lactobacillaceae;g__Lactobacillus;s__Lactobacillus reuteri                    |
| MLG 718 | 4  | 24310 | 10571 | 14332 | 58.96 | gii288730948 emb <br>FN597254.1 | 23509<br>11 | 11469 | 0.49 | 373 | k__Bacteria;p__Firmicutes;c__Bacilli;o__Lactobacillales;f__Streptococcaceae;g__Streptococcus;s__Streptococcus gallolyticus               |
| MLG 719 | 2  | 24276 | 14775 | 14775 | 60.86 | gii549815675 gb C<br>P006648.1  | 51668<br>57 | 14769 | 0.29 | 7   | k__Bacteria;p__Proteobacteria;c__Gammaproteobacteria;o__Enterobacteriales;f__Enterobacteriaceae;g__Klebsiella;s__Klebsiella pneumoniae   |
| MLG 720 | 2  | 24177 | 20808 | 24177 | 100   | gii569535620 gb C<br>P007025.1  | 47018<br>75 | 24173 | 0.51 | 264 | k__Bacteria;p__Proteobacteria;c__Gammaproteobacteria;o__Enterobacteriales;f__Enterobacteriaceae;g__Escherichia;s__Escherichia albertii   |
| MLG 721 | 12 | 23972 | 7227  | 18250 | 76.13 | gii682108593 gb C<br>P008897.1  | 46334<br>07 | 17849 | 0.39 | 4   | k__Bacteria;p__Proteobacteria;c__Gammaproteobacteria;o__Enterobacteriales;f__Enterobacteriaceae;g__Enterobacter;s__Enterobacter cloacae  |
| MLG 722 | 4  | 23928 | 7200  | 3846  | 16.07 | gii365906294 gb C<br>P003218.1  | 59741<br>09 | 3887  | 0.07 | 12  | k__Bacteria;p__Proteobacteria;c__Gammaproteobacteria;o__Enterobacteriales;f__Enterobacteriaceae;g__Klebsiella;s__Klebsiella oxytoca      |
| MLG 723 | 2  | 23822 | 21542 | 22772 | 95.59 | gii281177210 dbj <br>AP009378.1 | 47173<br>38 | 22764 | 0.48 | 1   | k__Bacteria;p__Proteobacteria;c__Gammaproteobacteria;o__Enterobacteriales;f__Enterobacteriaceae;g__Escherichia;s__Escherichia coli       |
| MLG 724 | 3  | 23503 | 10250 | 0     | 0     | 0                               | -           | 0     | 0    | 0   | Unknown                                                                                                                                  |
| MLG 725 | 4  | 23502 | 10779 | 10461 | 44.51 | gii284919779 emb <br>FN554766.1 | 52419<br>77 | 14873 | 0.28 | 1   | k__Bacteria;p__Proteobacteria;c__Gammaproteobacteria;o__Enterobacteriales;f__Enterobacteriaceae;g__Escherichia;s__Escherichia coli       |
| MLG 726 | 3  | 23451 | 18080 | 10123 | 43.17 | gii557470476 gb C<br>P006854.1  | 17891<br>38 | 11245 | 0.63 | 401 | k__Bacteria;p__Firmicutes;c__Bacilli;o__Lactobacillales;f__Lactobacillaceae;g__Pediococcus;s__Pediococcus pentosaceus                    |

|         |    |       |       |       |       |                              |          |       |      |     |                                                                                                                                            |
|---------|----|-------|-------|-------|-------|------------------------------|----------|-------|------|-----|--------------------------------------------------------------------------------------------------------------------------------------------|
| MLG 727 | 34 | 23402 | 1203  | 0     | 0     | 0                            | -        | 0     | 0    | 0   | Unknown                                                                                                                                    |
| MLG 728 | 2  | 23140 | 22770 | 0     | 0     | 0                            | -        | 0     | 0    | 0   | Unknown                                                                                                                                    |
| MLG 729 | 2  | 23131 | 14371 | 7768  | 33.58 | gii619734722 gb C P007557.1  | 50990 34 | 10282 | 0.2  | 267 | k__Bacteria;p__Proteobacteria;c__Gammaproteobacteria;o__Enterobacteriales;f__Enterobacteriaceae;g__Citrobacter;s__Citrobacter freundii     |
| MLG 730 | 8  | 22925 | 7962  | 2610  | 11.38 | gii110681940 gb C P000312.1  | 28973 93 | 2610  | 0.09 | 21  | k__Bacteria;p__Firmicutes;c__Clostridia;o__Clostridiales;f__Clostridiaceae;g__Clostridium;s__Clostridium perfringens                       |
| MLG 731 | 2  | 22914 | 16971 | 16843 | 73.51 | gii662712225 gb C P008823.1  | 48529 80 | 16985 | 0.35 | 4   | k__Bacteria;p__Proteobacteria;c__Gammaproteobacteria;o__Enterobacteriales;f__Enterobacteriaceae;g__Enterobacter;s__Enterobacter cloacae    |
| MLG 732 | 2  | 22902 | 17923 | 11329 | 49.47 | gii26111730 gb AE 014075.1   | 52314 28 | 15366 | 0.29 | 1   | k__Bacteria;p__Proteobacteria;c__Gammaproteobacteria;o__Enterobacteriales;f__Enterobacteriaceae;g__Escherichia;s__Escherichia coli         |
| MLG 733 | 2  | 22739 | 14185 | 0     | 0     | 0                            | -        | 0     | 0    | 0   | Unknown                                                                                                                                    |
| MLG 734 | 5  | 22672 | 10293 | 3352  | 14.78 | gii511525997 gb C P005991.1  | 50390 27 | 3349  | 0.07 | 268 | k__Bacteria;p__Proteobacteria;c__Gammaproteobacteria;o__Enterobacteriales;f__Enterobacteriaceae;g__Enterobacter;s__Enterobacter sp. R4-368 |
| MLG 735 | 2  | 22487 | 14192 | 8295  | 36.89 | gii218430358 emb  CU928163.2 | 52020 90 | 8295  | 0.16 | 1   | k__Bacteria;p__Proteobacteria;c__Gammaproteobacteria;o__Enterobacteriales;f__Enterobacteriaceae;g__Escherichia;s__Escherichia coli         |
| MLG 736 | 2  | 22303 | 18090 | 5527  | 24.78 | gii682100560 gb C P008943.1  | 48065 94 | 5536  | 0.12 | 308 | k__Bacteria;p__Proteobacteria;c__Gammaproteobacteria;o__Enterobacteriales;f__Enterobacteriaceae;g__Yersinia;s__Yersinia pseudotuberculosis |
| MLG 737 | 5  | 22301 | 7223  | 20140 | 90.31 | gii170517292 gb C P000970.1  | 50683 89 | 14442 | 0.28 | 1   | k__Bacteria;p__Proteobacteria;c__Gammaproteobacteria;o__Enterobacteriales;f__Enterobacteriaceae;g__Escherichia;s__Escherichia coli         |
| MLG 738 | 2  | 22297 | 18959 | 19717 | 88.43 | gii557470476 gb C P006854.1  | 17891 38 | 19899 | 1.11 | 401 | k__Bacteria;p__Firmicutes;c__Bacilli;o__Lactobacillales;f__Lactobacillaceae;g__Pediococcus;s__Pediococcus pentosaceus                      |
| MLG 739 | 2  | 22279 | 21777 | 12077 | 54.21 | gii288730948 emb  FN597254.1 | 23509 11 | 12070 | 0.51 | 373 | k__Bacteria;p__Firmicutes;c__Bacilli;o__Lactobacillales;f__Streptococcaceae;g__Streptococcus;s__Streptococcus gallolyticus                 |
| MLG 740 | 2  | 22048 | 11805 | 11375 | 51.59 | gii334732565 gb C P002824.1  | 52803 50 | 13613 | 0.26 | 15  | k__Bacteria;p__Proteobacteria;c__Gammaproteobacteria;o__Enterobacteriales;f__Enterobacteriaceae;g__Enterobacter;s__Enterobacter aerogenes  |
| MLG 741 | 2  | 21845 | 20365 | 0     | 0     | 0                            | -        | 0     | 0    | 0   | Unknown                                                                                                                                    |
| MLG 742 | 2  | 21756 | 16651 | 0     | 0     | 0                            | -        | 0     | 0    | 0   | Unknown                                                                                                                                    |
| MLG 743 | 3  | 21677 | 15111 | 1659  | 7.65  | gii619734722 gb C P007557.1  | 50990 34 | 1658  | 0.03 | 267 | k__Bacteria;p__Proteobacteria;c__Gammaproteobacteria;o__Enterobacteriales;f__Enterobacteriaceae;g__Citrobacter;s__Citrobacter freundii     |
| MLG 744 | 29 | 21661 | 3893  | 1034  | 4.77  | gii110681940 gb C P000312.1  | 28973 93 | 1037  | 0.04 | 21  | k__Bacteria;p__Firmicutes;c__Clostridia;o__Clostridiales;f__Clostridiaceae;g__Clostridium;s__Clostridium perfringens                       |
| MLG 745 | 2  | 21553 | 19885 | 19488 | 90.42 | gii309700213 emb  FN649414.1 | 51534 35 | 19494 | 0.38 | 1   | k__Bacteria;p__Proteobacteria;c__Gammaproteobacteria;o__Enterobacteriales;f__Enterobacteriaceae;g__Escherichia;s__Escherichia coli         |
| MLG 746 | 3  | 21547 | 12098 | 21547 | 100   | gii569535620 gb C P007025.1  | 47018 75 | 21614 | 0.46 | 264 | k__Bacteria;p__Proteobacteria;c__Gammaproteobacteria;o__Enterobacteriales;f__Enterobacteriaceae;g__Escherichia;s__Escherichia albertii     |
| MLG 747 | 2  | 21533 | 14963 | 0     | 0     | 0                            | -        | 0     | 0    | 0   | Unknown                                                                                                                                    |
| MLG 748 | 51 | 21503 | 761   | 20525 | 95.45 | gii681102165 emb  FO904942.1 | 40871 60 | 554   | 0.01 | 851 | k__Eukaryota;p__Ascomycota;c__Sordariomycetes;o__Sordariales;f__Lasiosphaeriaceae;g__Podospora;s__Podospora anserina                       |
| MLG 749 | 4  | 21461 | 8905  | 20772 | 96.79 | gii364515570 gb C P003200.1  | 53339 42 | 18582 | 0.35 | 7   | k__Bacteria;p__Proteobacteria;c__Gammaproteobacteria;o__Enterobacteriales;f__Enterobacteriaceae;g__Klebsiella;s__Klebsiella pneumoniae     |
| MLG 750 | 3  | 21402 | 8932  | 21254 | 99.31 | gii281177210 dbj  AP009378.1 | 47173 38 | 10000 | 0.21 | 1   | k__Bacteria;p__Proteobacteria;c__Gammaproteobacteria;o__Enterobacteriales;f__Enterobacteriaceae;g__Escherichia;s__Escherichia coli         |
| MLG 751 | 2  | 21356 | 20535 | 15016 | 70.31 | gii229368777 gb C P001485.1  | 31495 84 | 15001 | 0.48 | 435 | k__Bacteria;p__Proteobacteria;c__Gammaproteobacteria;o__Vibrionales;f__Vibrionaceae;g__Vibrio;s__Vibrio cholerae                           |
| MLG 752 | 7  | 21260 | 6211  | 19566 | 92.03 | gii338741860 emb  FR873481.1 | 22171 84 | 21659 | 0.98 | 375 | k__Bacteria;p__Firmicutes;c__Bacilli;o__Lactobacillales;f__Streptococcaceae;g__Streptococcus;s__Streptococcus salivarius                   |
| MLG 753 | 2  | 21173 | 14161 | 18595 | 87.82 | gii295054830 gb C P001918.1  | 53145 81 | 17564 | 0.33 | 4   | k__Bacteria;p__Proteobacteria;c__Gammaproteobacteria;o__Enterobacteriales;f__Enterobacteriaceae;g__Enterobacter;s__Enterobacter cloacae    |

|         |    |       |       |       |       |                              |         |       |      |     |                                                                                                                                                 |
|---------|----|-------|-------|-------|-------|------------------------------|---------|-------|------|-----|-------------------------------------------------------------------------------------------------------------------------------------------------|
| MLG 754 | 5  | 21166 | 8640  | 297   | 1.4   | gii361055534 gb C P003137.1  | 1829111 | 297   | 0.02 | 176 | k__Bacteria;p__Firmicutes;c__Bacilli;o__Lactobacillales;f__Lactobacillaceae;g__Pediococcus;s__Pediococcus clausenii                             |
| MLG 755 | 2  | 21128 | 13971 | 0     | 0     | 0                            | -       | 0     | 0    | 0   | Unknow                                                                                                                                          |
| MLG 756 | 2  | 21047 | 18650 | 9904  | 47.06 | gii514423830 gb C P006250.1  | 5328010 | 9898  | 0.19 | 278 | k__Bacteria;p__Proteobacteria;c__Gammaproteobacteria;o__Enterobacteriales;f__Enterobacteriaceae;g__Serratia;s__Serratia plymuthica              |
| MLG 757 | 3  | 20930 | 8545  | 0     | 0     | 0                            | -       | 0     | 0    | 0   | Unknow                                                                                                                                          |
| MLG 758 | 2  | 20900 | 14032 | 0     | 0     | 0                            | -       | 0     | 0    | 0   | Unknow                                                                                                                                          |
| MLG 759 | 2  | 20808 | 14280 | 5932  | 28.51 | gii394343076 gb C P003683.1  | 6097032 | 6252  | 0.1  | 12  | k__Bacteria;p__Proteobacteria;c__Gammaproteobacteria;o__Enterobacteriales;f__Enterobacteriaceae;g__Klebsiella;s__Klebsiella oxytoca             |
| MLG 760 | 2  | 20802 | 17485 | 20801 | 100   | gii406775301 gb C P003297.1  | 5253138 | 24712 | 0.47 | 1   | k__Bacteria;p__Proteobacteria;c__Gammaproteobacteria;o__Enterobacteriales;f__Enterobacteriaceae;g__Escherichia;s__Escherichia coli              |
| MLG 761 | 3  | 20702 | 18183 | 0     | 0     | 0                            | -       | 0     | 0    | 0   | Unknow                                                                                                                                          |
| MLG 762 | 2  | 20494 | 12075 | 20301 | 99.06 | gii612150118 gb C P007546.1  | 4561905 | 19812 | 0.43 | 9   | k__Bacteria;p__Proteobacteria;c__Gammaproteobacteria;o__Enterobacteriales;f__Enterobacteriaceae;g__Enterobacter;s__Enterobacter asburiae        |
| MLG 763 | 2  | 20489 | 14226 | 18687 | 91.21 | gii619734722 gb C P007557.1  | 5099034 | 19408 | 0.38 | 267 | k__Bacteria;p__Proteobacteria;c__Gammaproteobacteria;o__Enterobacteriales;f__Enterobacteriaceae;g__Citrobacter;s__Citrobacter freundii          |
| MLG 764 | 4  | 20432 | 11343 | 18641 | 91.23 | gii478439721 gb C P004856.1  | 3427276 | 18604 | 0.54 | 363 | k__Bacteria;p__Firmicutes;c__Bacilli;o__Lactobacillales;f__Enterococcaceae;g__Enterococcus;s__Enterococcus casseliflavus                        |
| MLG 765 | 7  | 20409 | 3675  | 13313 | 65.23 | gii573926912 gb C P007044.1  | 5485588 | 13724 | 0.25 | 290 | k__Bacteria;p__Proteobacteria;c__Gammaproteobacteria;o__Enterobacteriales;f__Enterobacteriaceae;g__Serratia;s__Serratia fonticola               |
| MLG 766 | 3  | 20249 | 11616 | 5552  | 27.42 | gii639440343 gb C P007215.2  | 4902024 | 5551  | 0.11 | 269 | k__Bacteria;p__Proteobacteria;c__Gammaproteobacteria;o__Enterobacteriales;f__Enterobacteriaceae;g__Kosakonia;s__Kosakonia sacchari              |
| MLG 767 | 5  | 20236 | 12027 | 0     | 0     | 0                            | -       | 0     | 0    | 0   | Unknow                                                                                                                                          |
| MLG 768 | 23 | 20204 | 1926  | 0     | 0     | 0                            | -       | 0     | 0    | 0   | Unknow                                                                                                                                          |
| MLG 769 | 2  | 20108 | 11956 | 20108 | 100   | gii110341805 gb C P000247.1  | 4938920 | 20854 | 0.42 | 1   | k__Bacteria;p__Proteobacteria;c__Gammaproteobacteria;o__Enterobacteriales;f__Enterobacteriaceae;g__Escherichia;s__Escherichia coli              |
| MLG 770 | 36 | 20089 | 1181  | 0     | 0     | 0                            | -       | 0     | 0    | 0   | Unknow                                                                                                                                          |
| MLG 771 | 3  | 20089 | 13128 | 0     | 0     | 0                            | -       | 0     | 0    | 0   | Unknow                                                                                                                                          |
| MLG 772 | 2  | 20086 | 17556 | 19406 | 96.61 | gii569535620 gb C P007025.1  | 4701875 | 26493 | 0.56 | 264 | k__Bacteria;p__Proteobacteria;c__Gammaproteobacteria;o__Enterobacteriales;f__Enterobacteriaceae;g__Escherichia;s__Escherichia albertii          |
| MLG 773 | 7  | 20004 | 4354  | 888   | 4.44  | gii374269796 emb  HE616528.1 | 4988504 | 882   | 0.02 | 262 | k__Bacteria;p__Proteobacteria;c__Gammaproteobacteria;o__Enterobacteriales;f__Enterobacteriaceae;g__Shigella;s__Shigella sonnei                  |
| MLG 774 | 3  | 19854 | 12328 | 12283 | 61.87 | gii365906294 gb C P003218.1  | 5974109 | 12439 | 0.21 | 12  | k__Bacteria;p__Proteobacteria;c__Gammaproteobacteria;o__Enterobacteriales;f__Enterobacteriaceae;g__Klebsiella;s__Klebsiella oxytoca             |
| MLG 775 | 2  | 19763 | 10573 | 16979 | 85.91 | gii209157093 gb C P001164.1  | 5572075 | 23168 | 0.42 | 1   | k__Bacteria;p__Proteobacteria;c__Gammaproteobacteria;o__Enterobacteriales;f__Enterobacteriaceae;g__Escherichia;s__Escherichia coli              |
| MLG 776 | 3  | 19706 | 7227  | 0     | 0     | 0                            | -       | 0     | 0    | 0   | Unknow                                                                                                                                          |
| MLG 777 | 33 | 19623 | 2780  | 1196  | 6.09  | gii335332259 emb  FR871757.1 | 1755458 | 94    | 0.01 | 669 | k__Bacteria;p__Proteobacteria;c__Epsilonproteobacteria;o__Campylobacteriales;f__Helicobacteriaceae;g__Helicobacter;s__Helicobacter bizzozeronii |
| MLG 778 | 2  | 19588 | 12479 | 5209  | 26.59 | gii605546632 gb C P007534.1  | 4737447 | 5208  | 0.11 | 5   | k__Bacteria;p__Proteobacteria;c__Gammaproteobacteria;o__Enterobacteriales;f__Enterobacteriaceae;g__Salmonella;s__Salmonella enterica            |
| MLG 779 | 3  | 19585 | 11484 | 9137  | 46.65 | gii160863331 gb C P000880.1  | 4600800 | 11066 | 0.24 | 5   | k__Bacteria;p__Proteobacteria;c__Gammaproteobacteria;o__Enterobacteriales;f__Enterobacteriaceae;g__Salmonella;s__Salmonella enterica            |
| MLG 780 | 4  | 19580 | 11252 | 0     | 0     | 0                            | -       | 0     | 0    | 0   | Unknow                                                                                                                                          |

|         |    |       |       |       |       |                                 |             |       |      |      |                                                                                                                                                               |
|---------|----|-------|-------|-------|-------|---------------------------------|-------------|-------|------|------|---------------------------------------------------------------------------------------------------------------------------------------------------------------|
| MLG 781 | 2  | 19577 | 11482 | 18532 | 94.66 | gii569535620 gb C<br>P007025.1  | 47018<br>75 | 22035 | 0.47 | 264  | k__Bacteria;p__Proteobacteria;c__Gammaproteobacteria;o__Enterobacteriales;f__Enterobacteriaceae;g__Escherichia;s__Escherichia albertii                        |
| MLG 782 | 2  | 19535 | 17368 | 13653 | 69.89 | gii526120653 gb C<br>P006603.1  | 21454<br>45 | 15372 | 0.72 | 367  | k__Bacteria;p__Firmicutes;c__Bacilli;o__Lactobacillales;f__Lactobacillaceae;g__Lactobacillus;s__Lactobacillus reuteri                                         |
| MLG 783 | 5  | 19517 | 6313  | 2376  | 12.17 | gii283101593 gb C<br>P001750.1  | 26363<br>67 | 2376  | 0.09 | 909  | k__Bacteria;p__Actinobacteria;c__Actinobacteria;o__Bifidobacteriales;f__Bifidobacteriaceae;g__Bifidobacterium;s__Bifidobacterium dentium                      |
| MLG 784 | 2  | 19470 | 15085 | 19194 | 98.58 | gii440045023 gb C<br>P003938.1  | 47621<br>79 | 21152 | 0.44 | 3    | k__Bacteria;p__Proteobacteria;c__Gammaproteobacteria;o__Enterobacteriales;f__Enterobacteriaceae;g__Unclassified;s__Enterobacteriaceae bacterium strain FGI 57 |
| MLG 785 | 2  | 19443 | 12619 | 17710 | 91.09 | gii157076741 gb C<br>P000800.1  | 49796<br>19 | 17703 | 0.36 | 1    | k__Bacteria;p__Proteobacteria;c__Gammaproteobacteria;o__Enterobacteriales;f__Enterobacteriaceae;g__Escherichia;s__Escherichia coli                            |
| MLG 786 | 2  | 19165 | 9854  | 17068 | 89.06 | gii110341805 gb C<br>P000247.1  | 49389<br>20 | 17068 | 0.35 | 1    | k__Bacteria;p__Proteobacteria;c__Gammaproteobacteria;o__Enterobacteriales;f__Enterobacteriaceae;g__Escherichia;s__Escherichia coli                            |
| MLG 787 | 2  | 19134 | 15332 | 8315  | 43.46 | gii206564770 gb C<br>P000964.1  | 56412<br>39 | 8316  | 0.15 | 7    | k__Bacteria;p__Proteobacteria;c__Gammaproteobacteria;o__Enterobacteriales;f__Enterobacteriaceae;g__Klebsiella;a__Klebsiella pneumoniae                        |
| MLG 788 | 3  | 19052 | 9696  | 0     | 0     | 0                               | -           | 0     | 0    | 0    | Unknow                                                                                                                                                        |
| MLG 789 | 3  | 18896 | 9167  | 4857  | 25.7  | gii513034319 gb C<br>P006033.1  | 30446<br>78 | 4862  | 0.16 | 385  | k__Bacteria;p__Firmicutes;c__Bacilli;o__Lactobacillales;f__Lactobacillaceae;g__Lactobacillus;s__Lactobacillus plantarum                                       |
| MLG 790 | 2  | 18892 | 14649 | 7099  | 37.58 | gii157065147 gb C<br>P000802.1  | 46435<br>38 | 7118  | 0.15 | 1    | k__Bacteria;p__Proteobacteria;c__Gammaproteobacteria;o__Enterobacteriales;f__Enterobacteriaceae;g__Escherichia;s__Escherichia coli                            |
| MLG 791 | 2  | 18840 | 15266 | 18840 | 100   | gii26111730 gb AE<br>014075.1   | 52314<br>28 | 18839 | 0.36 | 1    | k__Bacteria;p__Proteobacteria;c__Gammaproteobacteria;o__Enterobacteriales;f__Enterobacteriaceae;g__Escherichia;s__Escherichia coli                            |
| MLG 792 | 3  | 18749 | 13223 | 1076  | 5.74  | gii288730948 emb <br>FN597254.1 | 23509<br>11 | 1072  | 0.05 | 373  | k__Bacteria;p__Firmicutes;c__Bacilli;o__Lactobacillales;f__Streptococcaceae;g__Streptococcus;s__Streptococcus gallolyticus                                    |
| MLG 793 | 3  | 18714 | 15059 | 614   | 3.28  | gii684200017 gb C<br>P008920.1  | 42859<br>51 | 614   | 0.01 | 327  | k__Bacteria;p__Proteobacteria;c__Gammaproteobacteria;o__Enterobacteriales;f__Enterobacteriaceae;g__Providencia;s__Providencia stuartii                        |
| MLG 794 | 2  | 18655 | 16757 | 18655 | 100   | gii290760697 gb C<br>P001846.1  | 53863<br>52 | 18650 | 0.35 | 1    | k__Bacteria;p__Proteobacteria;c__Gammaproteobacteria;o__Enterobacteriales;f__Enterobacteriaceae;g__Escherichia;s__Escherichia coli                            |
| MLG 795 | 5  | 18622 | 13213 | 17283 | 92.81 | gii291516109 emb <br>FP929034.1 | 23849<br>87 | 17482 | 0.73 | 890  | k__Bacteria;p__Actinobacteria;c__Actinobacteria;o__Bifidobacteriales;f__Bifidobacteriaceae;g__Bifidobacterium;s__Bifidobacterium longum                       |
| MLG 796 | 10 | 18597 | 4709  | 17174 | 92.35 | gii209157093 gb C<br>P001164.1  | 55720<br>75 | 19076 | 0.34 | 1    | k__Bacteria;p__Proteobacteria;c__Gammaproteobacteria;o__Enterobacteriales;f__Enterobacteriaceae;g__Escherichia;s__Escherichia coli                            |
| MLG 797 | 2  | 18544 | 12616 | 17508 | 94.41 | gii209157093 gb C<br>P001164.1  | 55720<br>75 | 14402 | 0.26 | 1    | k__Bacteria;p__Proteobacteria;c__Gammaproteobacteria;o__Enterobacteriales;f__Enterobacteriaceae;g__Escherichia;s__Escherichia coli                            |
| MLG 798 | 17 | 18533 | 2332  | 0     | 0     | 0                               | -           | 0     | 0    | 0    | Unknow                                                                                                                                                        |
| MLG 799 | 3  | 18519 | 12639 | 14350 | 77.49 | gii345091121 gb C<br>P003026.1  | 48128<br>33 | 14520 | 0.3  | 9    | k__Bacteria;p__Proteobacteria;c__Gammaproteobacteria;o__Enterobacteriales;f__Enterobacteriaceae;g__Enterobacter;s__Enterobacter asburiae                      |
| MLG 800 | 2  | 18447 | 14775 | 13838 | 75.01 | gii526120653 gb C<br>P006603.1  | 21454<br>45 | 16649 | 0.78 | 367  | k__Bacteria;p__Firmicutes;c__Bacilli;o__Lactobacillales;f__Lactobacillaceae;g__Lactobacillus;s__Lactobacillus reuteri                                         |
| MLG 801 | 2  | 18373 | 10265 | 8701  | 47.36 | gii660577155 gb C<br>P008797.1  | 53961<br>64 | 9417  | 0.17 | 7    | k__Bacteria;p__Proteobacteria;c__Gammaproteobacteria;o__Enterobacteriales;f__Enterobacteriaceae;g__Klebsiella;a__Klebsiella pneumoniae                        |
| MLG 802 | 3  | 18328 | 8636  | 8636  | 47.12 | gii307551844 gb C<br>P001671.1  | 51313<br>97 | 8636  | 0.17 | 1    | k__Bacteria;p__Proteobacteria;c__Gammaproteobacteria;o__Enterobacteriales;f__Enterobacteriaceae;g__Escherichia;s__Escherichia coli                            |
| MLG 803 | 2  | 18287 | 9570  | 0     | 0     | 0                               | -           | 0     | 0    | 0    | Unknow                                                                                                                                                        |
| MLG 804 | 2  | 18264 | 9418  | 0     | 0     | 0                               | -           | 0     | 0    | 0    | Unknow                                                                                                                                                        |
| MLG 805 | 2  | 18149 | 15290 | 13517 | 74.48 | gii601101465 gb C<br>P007505.1  | 48644<br>10 | 15428 | 0.32 | 5    | k__Bacteria;p__Proteobacteria;c__Gammaproteobacteria;o__Enterobacteriales;f__Enterobacteriaceae;g__Salmonella;s__Salmonella enterica                          |
| MLG 806 | 7  | 18107 | 8649  | 1280  | 7.07  | gii674133359 gb C<br>P009208.1  | 53748<br>34 | 1281  | 0.02 | 7    | k__Bacteria;p__Proteobacteria;c__Gammaproteobacteria;o__Enterobacteriales;f__Enterobacteriaceae;g__Klebsiella;a__Klebsiella pneumoniae                        |
| MLG 807 | 8  | 17989 | 5953  | 3796  | 21.1  | gii597812552 gb C<br>P007446.1  | 25279<br>78 | 4672  | 0.18 | 1175 | k__Bacteria;p__Proteobacteria;c__Betaproteobacteria;o__Neisseriales;f__Neisseriaceae;g__Snodgrassella;s__Snodgrassella alvi                                   |

|         |   |       |       |       |       |                             |         |       |      |     |                                                                                                                                                               |
|---------|---|-------|-------|-------|-------|-----------------------------|---------|-------|------|-----|---------------------------------------------------------------------------------------------------------------------------------------------------------------|
| MLG 808 | 3 | 17956 | 13142 | 0     | 0     | 0                           | -       | 0     | 0    | 0   | Unknown                                                                                                                                                       |
| MLG 809 | 2 | 17939 | 9887  | 15296 | 85.27 | gii218430358 emb CU928163.2 | 5202090 | 15610 | 0.3  | 1   | k__Bacteria;p__Proteobacteria;c__Gammaproteobacteria;o__Enterobacteriales;f__Enterobacteriaceae;g__Escherichia;s__Escherichia coli                            |
| MLG 810 | 9 | 17925 | 4822  | 0     | 0     | 0                           | -       | 0     | 0    | 0   | Unknown                                                                                                                                                       |
| MLG 811 | 4 | 17915 | 6764  | 17438 | 97.34 | gii301154649 emb FQ312002.1 | 2086875 | 17431 | 0.84 | 419 | k__Bacteria;p__Proteobacteria;c__Gammaproteobacteria;o__Pasteurellales;f__Pasteurellaceae;g__Haemophilus;s__Haemophilus parainfluenzae                        |
| MLG 812 | 5 | 17889 | 7771  | 2848  | 15.92 | gii116100249 gb C P000419.1 | 1856368 | 2848  | 0.15 | 379 | k__Bacteria;p__Firmicutes;c__Bacilli;o__Lactobacillales;f__Streptococcaceae;g__Streptococcus;s__Streptococcus thermophilus                                    |
| MLG 813 | 3 | 17833 | 8646  | 12237 | 68.62 | gii682108593 gb C P008897.1 | 4633407 | 10490 | 0.23 | 4   | k__Bacteria;p__Proteobacteria;c__Gammaproteobacteria;o__Enterobacteriales;f__Enterobacteriaceae;g__Enterobacter;s__Enterobacter cloacae                       |
| MLG 814 | 3 | 17737 | 8305  | 0     | 0     | 0                           | -       | 0     | 0    | 0   | Unknown                                                                                                                                                       |
| MLG 815 | 4 | 17596 | 7008  | 12261 | 69.68 | gii308746527 gb C P002272.1 | 4814049 | 12367 | 0.26 | 8   | k__Bacteria;p__Proteobacteria;c__Gammaproteobacteria;o__Enterobacteriales;f__Enterobacteriaceae;g__Enterobacter;s__Enterobacter lignolyticus                  |
| MLG 816 | 5 | 17552 | 7987  | 16507 | 94.05 | gii124491690 emb AM406671.1 | 2529478 | 16460 | 0.65 | 88  | k__Bacteria;p__Firmicutes;c__Bacilli;o__Lactobacillales;f__Streptococcaceae;g__Lactococcus;s__Lactococcus lactis                                              |
| MLG 817 | 3 | 17427 | 10440 | 17427 | 100   | gii170517292 gb C P000970.1 | 5068389 | 17745 | 0.35 | 1   | k__Bacteria;p__Proteobacteria;c__Gammaproteobacteria;o__Enterobacteriales;f__Enterobacteriaceae;g__Escherichia;s__Escherichia coli                            |
| MLG 818 | 3 | 17313 | 12250 | 17313 | 100   | gii480474683 gb C P004142.1 | 5398151 | 17785 | 0.33 | 14  | k__Bacteria;p__Proteobacteria;c__Gammaproteobacteria;o__Enterobacteriales;f__Enterobacteriaceae;g__Raoultella;a_s__Raoultella omithinolytica                  |
| MLG 819 | 5 | 17310 | 6522  | 13003 | 75.12 | gii440045023 gb C P003938.1 | 4762179 | 14978 | 0.31 | 3   | k__Bacteria;p__Proteobacteria;c__Gammaproteobacteria;o__Enterobacteriales;f__Enterobacteriaceae;g__Unclassified;s__Enterobacteriaceae bacterium strain FGI 57 |
| MLG 820 | 6 | 17270 | 12862 | 3558  | 20.6  | gii392322800 gb C P003678.1 | 4968248 | 6176  | 0.12 | 4   | k__Bacteria;p__Proteobacteria;c__Gammaproteobacteria;o__Enterobacteriales;f__Enterobacteriaceae;g__Enterobacter;s__Enterobacter cloacae                       |
| MLG 821 | 2 | 17260 | 8817  | 0     | 0     | 0                           | -       | 0     | 0    | 0   | Unknown                                                                                                                                                       |
| MLG 822 | 3 | 17150 | 15648 | 16082 | 93.77 | gii148530277 gb C P000705.1 | 1999618 | 16027 | 0.8  | 367 | k__Bacteria;p__Firmicutes;c__Bacilli;o__Lactobacillales;f__Lactobacillaceae;g__Lactobacillus;s__Lactobacillus reuteri                                         |
| MLG 823 | 2 | 16997 | 14040 | 9225  | 54.27 | gii295107714 emb FP929054.1 | 3757491 | 9546  | 0.25 | 721 | k__Bacteria;p__Firmicutes;c__Clostridia;o__Clostridiales;f__Lachnospiraceae;g__Blautia;s__[Ruminococcus] obeum                                                |
| MLG 824 | 2 | 16965 | 8620  | 12038 | 70.96 | gii334732565 gb C P002824.1 | 5280350 | 19734 | 0.37 | 15  | k__Bacteria;p__Proteobacteria;c__Gammaproteobacteria;o__Enterobacteriales;f__Enterobacteriaceae;g__Enterobacter;s__Enterobacter aerogenes                     |
| MLG 825 | 3 | 16941 | 12283 | 16689 | 98.51 | gii110613622 gb C P000266.1 | 4574284 | 16704 | 0.37 | 261 | k__Bacteria;p__Proteobacteria;c__Gammaproteobacteria;o__Enterobacteriales;f__Enterobacteriaceae;g__Shigella;s__Shigella flexneri                              |
| MLG 826 | 2 | 16876 | 9231  | 16876 | 100   | gii157076741 gb C P000800.1 | 4979619 | 16876 | 0.34 | 1   | k__Bacteria;p__Proteobacteria;c__Gammaproteobacteria;o__Enterobacteriales;f__Enterobacteriaceae;g__Escherichia;s__Escherichia coli                            |
| MLG 827 | 2 | 16843 | 9561  | 6309  | 37.46 | gii394343076 gb C P003683.1 | 6097032 | 6307  | 0.1  | 12  | k__Bacteria;p__Proteobacteria;c__Gammaproteobacteria;o__Enterobacteriales;f__Enterobacteriaceae;g__Klebsiella;a_s__Klebsiella oxytoca                         |
| MLG 828 | 3 | 16679 | 7054  | 16679 | 100   | gii569535620 gb C P007025.1 | 4701875 | 16690 | 0.35 | 264 | k__Bacteria;p__Proteobacteria;c__Gammaproteobacteria;o__Enterobacteriales;f__Enterobacteriaceae;g__Escherichia;s__Escherichia albertii                        |
| MLG 829 | 3 | 16609 | 15465 | 13170 | 79.29 | gii374672113 dbj AP012281.1 | 2421471 | 13172 | 0.54 | 88  | k__Bacteria;p__Firmicutes;c__Bacilli;o__Lactobacillales;f__Streptococcaceae;g__Lactococcus;s__Lactococcus lactis                                              |
| MLG 830 | 3 | 16450 | 11325 | 11245 | 68.36 | gii288730948 emb FN597254.1 | 2350911 | 9710  | 0.41 | 373 | k__Bacteria;p__Firmicutes;c__Bacilli;o__Lactobacillales;f__Streptococcaceae;g__Streptococcus;s__Streptococcus gallolyticus                                    |
| MLG 831 | 4 | 16333 | 5569  | 13055 | 79.93 | gii400173048 gb C P003737.1 | 4726582 | 13040 | 0.28 | 4   | k__Bacteria;p__Proteobacteria;c__Gammaproteobacteria;o__Enterobacteriales;f__Enterobacteriaceae;g__Enterobacter;s__Enterobacter cloacae                       |
| MLG 832 | 2 | 16306 | 8688  | 0     | 0     | 0                           | -       | 0     | 0    | 0   | Unknown                                                                                                                                                       |
| MLG 833 | 2 | 16302 | 10164 | 0     | 0     | 0                           | -       | 0     | 0    | 0   | Unknown                                                                                                                                                       |
| MLG 834 | 7 | 16277 | 7030  | 4060  | 24.94 | gii13400022 gb AE 005176.1  | 2365589 | 6708  | 0.28 | 88  | k__Bacteria;p__Firmicutes;c__Bacilli;o__Lactobacillales;f__Streptococcaceae;g__Lactococcus;s__Lactococcus lactis                                              |

|         |    |       |       |       |       |                                 |             |       |      |     |                                                                                                                                                |
|---------|----|-------|-------|-------|-------|---------------------------------|-------------|-------|------|-----|------------------------------------------------------------------------------------------------------------------------------------------------|
| MLG 835 | 4  | 16238 | 6191  | 12987 | 79.98 | gii455418716 gb C<br>P004345.1  | 37995<br>39 | 12987 | 0.34 | 301 | k__Bacteria;p__Proteobacteria;c__Gammaproteobacteria;o__Enterobacteriales;f__Enterobacteriaceae;g__Morganel<br>la;s__Morganella morganii       |
| MLG 836 | 2  | 16155 | 8226  | 0     | 0     | 0                               | -           | 0     | 0    | 0   | Unknow                                                                                                                                         |
| MLG 837 | 2  | 16115 | 14541 | 15569 | 96.61 | gii353735273 gb C<br>P002641.1  | 21776<br>56 | 14234 | 0.65 | 34  | k__Bacteria;p__Firmicutes;c__Bacilli;o__Lactobacillales;f__Streptococcaceae;g__Streptococcus;s__Streptococcus<br>suis                          |
| MLG 838 | 4  | 16111 | 5274  | 2361  | 14.65 | gii218425442 emb <br>CU928162.2 | 52095<br>48 | 2352  | 0.05 | 1   | k__Bacteria;p__Proteobacteria;c__Gammaproteobacteria;o__Enterobacteriales;f__Enterobacteriaceae;g__Escheric<br>hia;s__Escherichia coli         |
| MLG 839 | 7  | 16063 | 4098  | 2489  | 15.5  | gii343179174 dbj <br>AP009332.1 | 19501<br>35 | 2975  | 0.15 | 365 | k__Bacteria;p__Firmicutes;c__Bacilli;o__Lactobacillales;f__Streptococcaceae;g__Lactococcus;s__Lactococcus<br>garvieae                          |
| MLG 840 | 2  | 15932 | 10476 | 3714  | 23.31 | gii110341805 gb C<br>P000247.1  | 49389<br>20 | 3713  | 0.08 | 1   | k__Bacteria;p__Proteobacteria;c__Gammaproteobacteria;o__Enterobacteriales;f__Enterobacteriaceae;g__Escheric<br>hia;s__Escherichia coli         |
| MLG 841 | 3  | 15896 | 7148  | 6448  | 40.56 | gii570286338 gb C<br>P006580.1  | 53699<br>29 | 6449  | 0.12 | 4   | k__Bacteria;p__Proteobacteria;c__Gammaproteobacteria;o__Enterobacteriales;f__Enterobacteriaceae;g__Enteroba<br>cter;s__Enterobacter cloacae    |
| MLG 842 | 2  | 15850 | 12014 | 3377  | 21.31 | gii365906294 gb C<br>P003218.1  | 59741<br>09 | 3386  | 0.06 | 12  | k__Bacteria;p__Proteobacteria;c__Gammaproteobacteria;o__Enterobacteriales;f__Enterobacteriaceae;g__Klebsiell<br>a;s__Klebsiella oxytoca        |
| MLG 843 | 3  | 15800 | 9562  | 15752 | 99.7  | gii602773583 gb C<br>P007273.1  | 50521<br>73 | 18725 | 0.37 | 5   | k__Bacteria;p__Proteobacteria;c__Gammaproteobacteria;o__Enterobacteriales;f__Enterobacteriaceae;g__Salmone<br>lla;s__Salmonella enterica       |
| MLG 844 | 2  | 15798 | 14319 | 4385  | 27.76 | gii47118301 dbj B<br>A000007.2  | 54984<br>50 | 8162  | 0.15 | 1   | k__Bacteria;p__Proteobacteria;c__Gammaproteobacteria;o__Enterobacteriales;f__Enterobacteriaceae;g__Escheric<br>hia;s__Escherichia coli         |
| MLG 845 | 3  | 15724 | 6685  | 3020  | 19.21 | gii384478111 gb C<br>P003488.1  | 44021<br>09 | 3018  | 0.07 | 327 | k__Bacteria;p__Proteobacteria;c__Gammaproteobacteria;o__Enterobacteriales;f__Enterobacteriaceae;g__Providen<br>cia;s__Providencia stuartii     |
| MLG 846 | 2  | 15703 | 8124  | 8124  | 51.74 | gii311772326 gb C<br>P002286.1  | 22659<br>43 | 8123  | 0.36 | 890 | k__Bacteria;p__Actinobacteria;c__Actinobacteria;o__Bifidobacteriales;f__Bifidobacteriaceae;g__Bifidobacterium;<br>s__Bifidobacterium longum    |
| MLG 847 | 6  | 15657 | 7099  | 2971  | 18.98 | gii124491690 emb <br>AM406671.1 | 25294<br>78 | 5836  | 0.23 | 88  | k__Bacteria;p__Firmicutes;c__Bacilli;o__Lactobacillales;f__Streptococcaceae;g__Lactococcus;s__Lactococcus<br>lactis                            |
| MLG 848 | 2  | 15656 | 13881 | 0     | 0     | 0                               | -           | 0     | 0    | 0   | Unknow                                                                                                                                         |
| MLG 849 | 6  | 15641 | 11871 | 15577 | 99.59 | gii334732565 gb C<br>P002824.1  | 52803<br>50 | 17986 | 0.34 | 15  | k__Bacteria;p__Proteobacteria;c__Gammaproteobacteria;o__Enterobacteriales;f__Enterobacteriaceae;g__Enteroba<br>cter;s__Enterobacter aerogenes  |
| MLG 850 | 16 | 15575 | 2468  | 8847  | 56.8  | gii187720473 gb C<br>P001056.1  | 38003<br>27 | 8848  | 0.23 | 20  | k__Bacteria;p__Firmicutes;c__Clostridia;o__Clostridiales;f__Clostridiaceae;g__Clostridium;s__Clostridium<br>botulinum                          |
| MLG 851 | 2  | 15514 | 12639 | 5767  | 37.17 | gii320459527 dbj <br>AP010890.1 | 24003<br>12 | 7818  | 0.33 | 890 | k__Bacteria;p__Actinobacteria;c__Actinobacteria;o__Bifidobacteriales;f__Bifidobacteriaceae;g__Bifidobacterium;<br>s__Bifidobacterium longum    |
| MLG 852 | 3  | 15513 | 6308  | 13467 | 86.81 | gii675819096 emb <br>LM995659.1 | 12361<br>24 | 13483 | 1.09 | 1   | k__Bacteria;p__Proteobacteria;c__Gammaproteobacteria;o__Enterobacteriales;f__Enterobacteriaceae;g__Escheric<br>hia;s__Escherichia coli         |
| MLG 853 | 2  | 15510 | 13137 | 2373  | 15.3  | gii110341805 gb C<br>P000247.1  | 49389<br>20 | 2479  | 0.05 | 1   | k__Bacteria;p__Proteobacteria;c__Gammaproteobacteria;o__Enterobacteriales;f__Enterobacteriaceae;g__Escheric<br>hia;s__Escherichia coli         |
| MLG 854 | 5  | 15451 | 5053  | 812   | 5.26  | gii218354981 emb <br>CU928158.2 | 45887<br>11 | 811   | 0.02 | 2   | k__Bacteria;p__Proteobacteria;c__Gammaproteobacteria;o__Enterobacteriales;f__Enterobacteriaceae;g__Escheric<br>hia;s__Escherichia fergusonii   |
| MLG 855 | 2  | 15330 | 10893 | 13670 | 89.17 | gii169752989 gb C<br>P000946.1  | 47462<br>18 | 10141 | 0.21 | 1   | k__Bacteria;p__Proteobacteria;c__Gammaproteobacteria;o__Enterobacteriales;f__Enterobacteriaceae;g__Escheric<br>hia;s__Escherichia coli         |
| MLG 856 | 14 | 15314 | 2486  | 15314 | 100   | gii219620149 gb C<br>P001213.1  | 19336<br>95 | 15482 | 0.8  | 898 | k__Bacteria;p__Actinobacteria;c__Actinobacteria;o__Bifidobacteriales;f__Bifidobacteriaceae;g__Bifidobacterium;<br>s__Bifidobacterium animalis  |
| MLG 857 | 3  | 15265 | 11859 | 7933  | 51.97 | gii526120653 gb C<br>P006603.1  | 21454<br>45 | 7937  | 0.37 | 367 | k__Bacteria;p__Firmicutes;c__Bacilli;o__Lactobacillales;f__Lactobacillaceae;g__Lactobacillus;s__Lactobacillus<br>reuteri                       |
| MLG 858 | 2  | 15203 | 14443 | 0     | 0     | 0                               | -           | 0     | 0    | 0   | Unknow                                                                                                                                         |
| MLG 859 | 2  | 15181 | 13309 | 14987 | 98.72 | gii480474683 gb C<br>P004142.1  | 53981<br>51 | 14968 | 0.28 | 14  | k__Bacteria;p__Proteobacteria;c__Gammaproteobacteria;o__Enterobacteriales;f__Enterobacteriaceae;g__Raoultell<br>a;s__Raoultella omithinolytica |
| MLG 860 | 2  | 15175 | 12898 | 13273 | 87.47 | gii170517292 gb C<br>P000970.1  | 50683<br>89 | 13267 | 0.26 | 1   | k__Bacteria;p__Proteobacteria;c__Gammaproteobacteria;o__Enterobacteriales;f__Enterobacteriaceae;g__Escheric<br>hia;s__Escherichia coli         |
| MLG 861 | 3  | 15165 | 8738  | 0     | 0     | 0                               | -           | 0     | 0    | 0   | Unknow                                                                                                                                         |



|         |    |       |       |       |       |                              |         |       |      |      |                                                                                                                                                               |
|---------|----|-------|-------|-------|-------|------------------------------|---------|-------|------|------|---------------------------------------------------------------------------------------------------------------------------------------------------------------|
| MLG 862 | 2  | 15164 | 8041  | 15164 | 100   | gii569535620 gb C P007025.1  | 4701875 | 15164 | 0.32 | 264  | k__Bacteria;p__Proteobacteria;c__Gammaproteobacteria;o__Enterobacteriales;f__Enterobacteriaceae;g__Escherichia;s__Escherichia albertii                        |
| MLG 863 | 10 | 15148 | 4031  | 1499  | 9.9   | gii110673209 gb C P000246.1  | 3256683 | 1491  | 0.05 | 21   | k__Bacteria;p__Firmicutes;c__Clostridia;o__Clostridiales;f__Clostridiaceae;g__Clostridium;s__Clostridium perfringens                                          |
| MLG 864 | 5  | 15101 | 10945 | 8042  | 53.25 | gii188497817 gb C P001078.1  | 3659644 | 7073  | 0.19 | 20   | k__Bacteria;p__Firmicutes;c__Clostridia;o__Clostridiales;f__Clostridiaceae;g__Clostridium;s__Clostridium botulinum                                            |
| MLG 865 | 2  | 15101 | 9630  | 15101 | 100   | gii664693170 gb C P005998.1  | 4944397 | 15101 | 0.31 | 1    | k__Bacteria;p__Proteobacteria;c__Gammaproteobacteria;o__Enterobacteriales;f__Enterobacteriaceae;g__Escherichia;s__Escherichia coli                            |
| MLG 866 | 2  | 15025 | 14352 | 13917 | 92.63 | gii660550561 gb C P008700.1  | 5365144 | 13981 | 0.26 | 7    | k__Bacteria;p__Proteobacteria;c__Gammaproteobacteria;o__Enterobacteriales;f__Enterobacteriaceae;g__Klebsiella;a__Klebsiella pneumoniae                        |
| MLG 867 | 10 | 15003 | 3536  | 4114  | 27.42 | gii218354981 emb  CU928158.2 | 4588711 | 4226  | 0.09 | 2    | k__Bacteria;p__Proteobacteria;c__Gammaproteobacteria;o__Enterobacteriales;f__Enterobacteriaceae;g__Escherichia;s__Escherichia fergusonii                      |
| MLG 868 | 3  | 15001 | 8143  | 9543  | 63.62 | gii569535620 gb C P007025.1  | 4701875 | 9561  | 0.2  | 264  | k__Bacteria;p__Proteobacteria;c__Gammaproteobacteria;o__Enterobacteriales;f__Enterobacteriaceae;g__Escherichia;s__Escherichia albertii                        |
| MLG 869 | 2  | 15001 | 9882  | 14745 | 98.29 | gii569535620 gb C P007025.1  | 4701875 | 14910 | 0.32 | 264  | k__Bacteria;p__Proteobacteria;c__Gammaproteobacteria;o__Enterobacteriales;f__Enterobacteriaceae;g__Escherichia;s__Escherichia albertii                        |
| MLG 870 | 2  | 14980 | 10389 | 4591  | 30.65 | gii480474683 gb C P004142.1  | 5398151 | 4596  | 0.09 | 14   | k__Bacteria;p__Proteobacteria;c__Gammaproteobacteria;o__Enterobacteriales;f__Enterobacteriaceae;g__Raoultella;a__Raoultella omithinolytica                    |
| MLG 871 | 2  | 14978 | 11330 | 0     | 0     | 0                            | -       | 0     | 0    | 0    | Unknow                                                                                                                                                        |
| MLG 872 | 6  | 14971 | 11846 | 0     | 0     | 0                            | -       | 0     | 0    | 0    | Unknow                                                                                                                                                        |
| MLG 873 | 10 | 14951 | 2343  | 13567 | 90.74 | gii150839411 gb C P000746.1  | 2319663 | 13674 | 0.59 | 1216 | k__Bacteria;p__Proteobacteria;c__Gammaproteobacteria;o__Pasteurellales;f__Pasteurellaceae;g__Actinobacillus;s__Actinobacillus succinogenes                    |
| MLG 874 | 4  | 14902 | 5942  | 0     | 0     | 0                            | -       | 0     | 0    | 0    | Unknow                                                                                                                                                        |
| MLG 875 | 4  | 14853 | 5335  | 11441 | 77.03 | gii660567586 gb C P008788.1  | 6152190 | 8865  | 0.14 | 12   | k__Bacteria;p__Proteobacteria;c__Gammaproteobacteria;o__Enterobacteriales;f__Enterobacteriaceae;g__Klebsiella;a__Klebsiella oxytoca                           |
| MLG 876 | 4  | 14841 | 5597  | 0     | 0     | 0                            | -       | 0     | 0    | 0    | Unknow                                                                                                                                                        |
| MLG 877 | 2  | 14826 | 13629 | 1185  | 7.99  | gii499053647 gb C P005942.1  | 3033566 | 1185  | 0.04 | 385  | k__Bacteria;p__Firmicutes;c__Bacilli;o__Lactobacillales;f__Lactobacillaceae;g__Lactobacillus;s__Lactobacillus plantarum                                       |
| MLG 878 | 7  | 14795 | 8126  | 14062 | 95.05 | gii149901357 gb C P000721.1  | 6000632 | 14610 | 0.24 | 37   | k__Bacteria;p__Firmicutes;c__Clostridia;o__Clostridiales;f__Clostridiaceae;g__Clostridium;s__Clostridium beijerinckii                                         |
| MLG 879 | 2  | 14794 | 12607 | 11577 | 78.25 | gii595597955 gb C P007392.1  | 5054509 | 11566 | 0.23 | 1    | k__Bacteria;p__Proteobacteria;c__Gammaproteobacteria;o__Enterobacteriales;f__Enterobacteriaceae;g__Escherichia;s__Escherichia coli                            |
| MLG 880 | 3  | 14773 | 6512  | 14773 | 100   | gii218430358 emb  CU928163.2 | 5202090 | 14752 | 0.28 | 1    | k__Bacteria;p__Proteobacteria;c__Gammaproteobacteria;o__Enterobacteriales;f__Enterobacteriaceae;g__Escherichia;s__Escherichia coli                            |
| MLG 881 | 8  | 14764 | 3296  | 11340 | 76.81 | gii440045023 gb C P003938.1  | 4762179 | 12521 | 0.26 | 3    | k__Bacteria;p__Proteobacteria;c__Gammaproteobacteria;o__Enterobacteriales;f__Enterobacteriaceae;g__Unclassified;s__Enterobacteriaceae bacterium strain FGI 57 |
| MLG 882 | 2  | 14752 | 7948  | 7056  | 47.83 | gii384478111 gb C P003488.1  | 4402109 | 3526  | 0.08 | 327  | k__Bacteria;p__Proteobacteria;c__Gammaproteobacteria;o__Enterobacteriales;f__Enterobacteriaceae;g__Providencia;s__Providencia stuartii                        |
| MLG 883 | 2  | 14706 | 11096 | 4718  | 32.08 | gii619734722 gb C P007557.1  | 5099034 | 4717  | 0.09 | 267  | k__Bacteria;p__Proteobacteria;c__Gammaproteobacteria;o__Enterobacteriales;f__Enterobacteriaceae;g__Citrobacter;s__Citrobacter freundii                        |
| MLG 884 | 4  | 14705 | 8041  | 14705 | 100   | gii170517292 gb C P000970.1  | 5068389 | 14704 | 0.29 | 1    | k__Bacteria;p__Proteobacteria;c__Gammaproteobacteria;o__Enterobacteriales;f__Enterobacteriaceae;g__Escherichia;s__Escherichia coli                            |
| MLG 885 | 3  | 14702 | 6798  | 11979 | 81.48 | gii595583568 gb C P007265.1  | 4758629 | 9815  | 0.21 | 1    | k__Bacteria;p__Proteobacteria;c__Gammaproteobacteria;o__Enterobacteriales;f__Enterobacteriaceae;g__Escherichia;s__Escherichia coli                            |
| MLG 886 | 4  | 14668 | 11454 | 4208  | 28.69 | gii222031834 emb  CU651637.1 | 4773108 | 4208  | 0.09 | 1    | k__Bacteria;p__Proteobacteria;c__Gammaproteobacteria;o__Enterobacteriales;f__Enterobacteriaceae;g__Escherichia;s__Escherichia coli                            |
| MLG 887 | 4  | 14652 | 6150  | 5414  | 36.95 | gii660550561 gb C P008700.1  | 5365144 | 5576  | 0.1  | 7    | k__Bacteria;p__Proteobacteria;c__Gammaproteobacteria;o__Enterobacteriales;f__Enterobacteriaceae;g__Klebsiella;a__Klebsiella pneumoniae                        |
| MLG 888 | 2  | 14600 | 8547  | 6241  | 42.75 | gii295054830 gb C P001918.1  | 5314581 | 6247  | 0.12 | 4    | k__Bacteria;p__Proteobacteria;c__Gammaproteobacteria;o__Enterobacteriales;f__Enterobacteriaceae;g__Enterobacter;s__Enterobacter cloacae                       |

|         |   |       |       |       |       |                             |         |       |      |     |                                                                                                                                           |
|---------|---|-------|-------|-------|-------|-----------------------------|---------|-------|------|-----|-------------------------------------------------------------------------------------------------------------------------------------------|
| MLG 889 | 8 | 14584 | 3969  | 402   | 2.76  | gi 670938612 gb C P006630.1 | 2833899 | 402   | 0.01 | 135 | k__Bacteria;p__Firmicutes;c__Bacilli;o__Bacillales;f__Staphylococcaceae;g__Staphylococcus;s__Staphylococcus aureus                        |
| MLG 890 | 7 | 14527 | 3542  | 7347  | 50.57 | gi 295095013 emb FP929040.1 | 4908759 | 7369  | 0.15 | 4   | k__Bacteria;p__Proteobacteria;c__Gammaproteobacteria;o__Enterobacteriales;f__Enterobacteriaceae;g__Enterobacter;s__Enterobacter cloacae   |
| MLG 891 | 3 | 14464 | 8185  | 11538 | 79.77 | gi 443901024 emb F0203355.1 | 5419609 | 12048 | 0.22 | 15  | k__Bacteria;p__Proteobacteria;c__Gammaproteobacteria;o__Enterobacteriales;f__Enterobacteriaceae;g__Enterobacter;s__Enterobacter aerogenes |
| MLG 892 | 2 | 14460 | 10033 | 6809  | 47.09 | gi 170517292 gb C P000970.1 | 5068389 | 6806  | 0.13 | 1   | k__Bacteria;p__Proteobacteria;c__Gammaproteobacteria;o__Enterobacteriales;f__Enterobacteriaceae;g__Escherichia;s__Escherichia coli        |
| MLG 893 | 2 | 14409 | 10177 | 5292  | 36.73 | gi 675819096 emb LM995659.1 | 1236124 | 5292  | 0.43 | 1   | k__Bacteria;p__Proteobacteria;c__Gammaproteobacteria;o__Enterobacteriales;f__Enterobacteriaceae;g__Escherichia;s__Escherichia coli        |
| MLG 894 | 2 | 14407 | 12111 | 0     | 0     | 0                           | -       | 0     | 0    | 0   | Unknow                                                                                                                                    |
| MLG 895 | 2 | 14392 | 8258  | 10387 | 72.17 | gi 523811606 gb C P006053.1 | 4730612 | 7029  | 0.15 | 5   | k__Bacteria;p__Proteobacteria;c__Gammaproteobacteria;o__Enterobacteriales;f__Enterobacteriaceae;g__Salmonella;s__Salmonella enterica      |
| MLG 896 | 2 | 14365 | 7575  | 8707  | 60.61 | gi 662712225 gb C P008823.1 | 4852980 | 8701  | 0.18 | 4   | k__Bacteria;p__Proteobacteria;c__Gammaproteobacteria;o__Enterobacteriales;f__Enterobacteriaceae;g__Enterobacter;s__Enterobacter cloacae   |
| MLG 897 | 2 | 14346 | 11529 | 13938 | 97.16 | gi 308044682 gb C P002222.1 | 3254376 | 13939 | 0.43 | 385 | k__Bacteria;p__Firmicutes;c__Bacilli;o__Lactobacillales;f__Lactobacillaceae;g__Lactobacillus;s__Lactobacillus plantarum                   |
| MLG 898 | 2 | 14325 | 8013  | 0     | 0     | 0                           | -       | 0     | 0    | 0   | Unknow                                                                                                                                    |
| MLG 899 | 8 | 14306 | 3178  | 14306 | 100   | gi 110673209 gb C P000246.1 | 3256683 | 14306 | 0.44 | 21  | k__Bacteria;p__Firmicutes;c__Clostridia;o__Clostridiales;f__Clostridiaceae;g__Clostridium;s__Clostridium perfringens                      |
| MLG 900 | 2 | 14265 | 13620 | 4314  | 30.24 | gi 116094265 gb C P000413.1 | 1894360 | 4314  | 0.23 | 384 | k__Bacteria;p__Firmicutes;c__Bacilli;o__Lactobacillales;f__Lactobacillaceae;g__Lactobacillus;s__Lactobacillus gasseri                     |
| MLG 901 | 4 | 14259 | 7204  | 14200 | 99.59 | gi 169752989 gb C P000946.1 | 4746218 | 14528 | 0.31 | 1   | k__Bacteria;p__Proteobacteria;c__Gammaproteobacteria;o__Enterobacteriales;f__Enterobacteriaceae;g__Escherichia;s__Escherichia coli        |
| MLG 902 | 2 | 14243 | 13700 | 9763  | 68.55 | gi 667708115 gb C P006798.1 | 5348284 | 9763  | 0.18 | 7   | k__Bacteria;p__Proteobacteria;c__Gammaproteobacteria;o__Enterobacteriales;f__Enterobacteriaceae;g__Klebsiella;s__Klebsiella pneumoniae    |
| MLG 903 | 2 | 14226 | 9624  | 13892 | 97.65 | gi 169887498 gb C P000948.1 | 4686137 | 13897 | 0.3  | 1   | k__Bacteria;p__Proteobacteria;c__Gammaproteobacteria;o__Enterobacteriales;f__Enterobacteriaceae;g__Escherichia;s__Escherichia coli        |
| MLG 904 | 2 | 14224 | 13374 | 13374 | 94.02 | gi 569550235 gb C P003999.1 | 5307003 | 13374 | 0.25 | 7   | k__Bacteria;p__Proteobacteria;c__Gammaproteobacteria;o__Enterobacteriales;f__Enterobacteriaceae;g__Klebsiella;s__Klebsiella pneumoniae    |
| MLG 905 | 4 | 14207 | 6483  | 0     | 0     | 0                           | -       | 0     | 0    | 0   | Unknow                                                                                                                                    |
| MLG 906 | 2 | 14205 | 12601 | 0     | 0     | 0                           | -       | 0     | 0    | 0   | Unknow                                                                                                                                    |
| MLG 907 | 2 | 14201 | 8479  | 13810 | 97.25 | gi 222031834 emb CU651637.1 | 4773108 | 13807 | 0.29 | 1   | k__Bacteria;p__Proteobacteria;c__Gammaproteobacteria;o__Enterobacteriales;f__Enterobacteriaceae;g__Escherichia;s__Escherichia coli        |
| MLG 908 | 2 | 14143 | 11512 | 6737  | 47.63 | gi 169752989 gb C P000946.1 | 4746218 | 5709  | 0.12 | 1   | k__Bacteria;p__Proteobacteria;c__Gammaproteobacteria;o__Enterobacteriales;f__Enterobacteriaceae;g__Escherichia;s__Escherichia coli        |
| MLG 909 | 4 | 14102 | 4184  | 0     | 0     | 0                           | -       | 0     | 0    | 0   | Unknow                                                                                                                                    |
| MLG 910 | 2 | 14073 | 10168 | 12022 | 85.43 | gi 612156087 gb C P004887.1 | 5914407 | 9510  | 0.16 | 12  | k__Bacteria;p__Proteobacteria;c__Gammaproteobacteria;o__Enterobacteriales;f__Enterobacteriaceae;g__Klebsiella;s__Klebsiella oxytoca       |
| MLG 911 | 5 | 14037 | 6890  | 4861  | 34.63 | gi 526120653 gb C P006603.1 | 2145445 | 4879  | 0.23 | 367 | k__Bacteria;p__Firmicutes;c__Bacilli;o__Lactobacillales;f__Lactobacillaceae;g__Lactobacillus;s__Lactobacillus reuteri                     |
| MLG 912 | 3 | 14025 | 6663  | 12897 | 91.96 | gi 619734722 gb C P007557.1 | 5099034 | 12883 | 0.25 | 267 | k__Bacteria;p__Proteobacteria;c__Gammaproteobacteria;o__Enterobacteriales;f__Enterobacteriaceae;g__Citrobacter;s__Citrobacter freundii    |
| MLG 913 | 2 | 14003 | 10107 | 13542 | 96.71 | gi 400173048 gb C P003737.1 | 4726582 | 12129 | 0.26 | 4   | k__Bacteria;p__Proteobacteria;c__Gammaproteobacteria;o__Enterobacteriales;f__Enterobacteriaceae;g__Enterobacter;s__Enterobacter cloacae   |
| MLG 914 | 3 | 13938 | 8653  | 3508  | 25.17 | gi 281599365 gb C P001383.1 | 4650856 | 8710  | 0.19 | 261 | k__Bacteria;p__Proteobacteria;c__Gammaproteobacteria;o__Enterobacteriales;f__Enterobacteriaceae;g__Shigella;s__Shigella flexneri          |
| MLG 915 | 2 | 13924 | 7696  | 6665  | 47.87 | gi 291482250 emb FN668375.1 | 4308325 | 12011 | 0.28 | 22  | k__Bacteria;p__Firmicutes;c__Clostridia;o__Clostridiales;f__Peptostreptococcaceae;g__Peptoclostridium;s__Peptoclostridium difficile       |

|         |   |       |       |       |       |                              |         |       |      |     |                                                                                                                                           |
|---------|---|-------|-------|-------|-------|------------------------------|---------|-------|------|-----|-------------------------------------------------------------------------------------------------------------------------------------------|
| MLG 916 | 3 | 13871 | 10753 | 11952 | 86.17 | gii329127738 gb C P002652.1  | 2506301 | 11463 | 0.46 | 395 | k__Bacteria;p__Firmicutes;c__Bacilli;o__Lactobacillales;f__Lactobacillaceae;g__Lactobacillus;s__Lactobacillus buchneri                    |
| MLG 917 | 2 | 13868 | 11223 | 0     | 0     | 0                            | -       | 0     | 0    | 0   | Unknow                                                                                                                                    |
| MLG 918 | 2 | 13845 | 12159 | 13845 | 100   | gii115511419 gb C P000468.1  | 5082025 | 13472 | 0.27 | 1   | k__Bacteria;p__Proteobacteria;c__Gammaproteobacteria;o__Enterobacteriales;f__Enterobacteriaceae;g__Escherichia;s__Escherichia coli        |
| MLG 919 | 3 | 13841 | 6381  | 2792  | 20.17 | gii302195072 gb C P002109.1  | 4662871 | 2792  | 0.06 | 843 | k__Bacteria;p__Firmicutes;c__Clostridia;o__Clostridiales;f__Lachnospiraceae;g__Lachnoclostridium;s__[Clostridium] saccharolyticum         |
| MLG 920 | 2 | 13833 | 12642 | 6772  | 48.96 | gii682108593 gb C P008897.1  | 4633407 | 7508  | 0.16 | 4   | k__Bacteria;p__Proteobacteria;c__Gammaproteobacteria;o__Enterobacteriales;f__Enterobacteriaceae;g__Enterobacter;s__Enterobacter cloacae   |
| MLG 921 | 2 | 13815 | 7481  | 8411  | 60.88 | gii394343076 gb C P003683.1  | 6097032 | 5749  | 0.09 | 12  | k__Bacteria;p__Proteobacteria;c__Gammaproteobacteria;o__Enterobacteriales;f__Enterobacteriaceae;g__Klebsiella;s__Klebsiella oxytoca       |
| MLG 922 | 3 | 13798 | 8347  | 3400  | 24.64 | gii601101465 gb C P007505.1  | 4864410 | 5539  | 0.11 | 5   | k__Bacteria;p__Proteobacteria;c__Gammaproteobacteria;o__Enterobacteriales;f__Enterobacteriaceae;g__Salmonella;s__Salmonella enterica      |
| MLG 923 | 2 | 13796 | 10442 | 8212  | 59.52 | gii602773583 gb C P007273.1  | 5052173 | 8909  | 0.18 | 5   | k__Bacteria;p__Proteobacteria;c__Gammaproteobacteria;o__Enterobacteriales;f__Enterobacteriaceae;g__Salmonella;s__Salmonella enterica      |
| MLG 924 | 3 | 13733 | 5765  | 10721 | 78.07 | gii334279325 dbj  AP012053.1 | 2362241 | 13694 | 0.58 | 373 | k__Bacteria;p__Firmicutes;c__Bacilli;o__Lactobacillales;f__Streptococcaceae;g__Streptococcus;s__Streptococcus gallolyticus                |
| MLG 925 | 2 | 13716 | 12471 | 7129  | 51.98 | gii549815675 gb C P006648.1  | 5166857 | 7822  | 0.15 | 7   | k__Bacteria;p__Proteobacteria;c__Gammaproteobacteria;o__Enterobacteriales;f__Enterobacteriaceae;g__Klebsiella;s__Klebsiella pneumoniae    |
| MLG 926 | 3 | 13694 | 6248  | 11108 | 81.12 | gii218354981 emb  CU928158.2 | 4588711 | 11108 | 0.24 | 2   | k__Bacteria;p__Proteobacteria;c__Gammaproteobacteria;o__Enterobacteriales;f__Enterobacteriaceae;g__Escherichia;s__Escherichia fergusonii  |
| MLG 927 | 3 | 13629 | 4992  | 0     | 0     | 0                            | -       | 0     | 0    | 0   | Unknow                                                                                                                                    |
| MLG 928 | 2 | 13610 | 7738  | 0     | 0     | 0                            | -       | 0     | 0    | 0   | Unknow                                                                                                                                    |
| MLG 929 | 2 | 13605 | 11976 | 13137 | 96.56 | gii110341805 gb C P000247.1  | 4938920 | 11848 | 0.24 | 1   | k__Bacteria;p__Proteobacteria;c__Gammaproteobacteria;o__Enterobacteriales;f__Enterobacteriaceae;g__Escherichia;s__Escherichia coli        |
| MLG 930 | 2 | 13536 | 8290  | 2804  | 20.72 | gii267983018 gb C P001135.1  | 3760463 | 2803  | 0.07 | 294 | k__Bacteria;p__Proteobacteria;c__Gammaproteobacteria;o__Enterobacteriales;f__Enterobacteriaceae;g__Edwardsiella;s__Edwardsiella tarda     |
| MLG 931 | 2 | 13493 | 7463  | 6633  | 49.16 | gii374681091 gb C P003295.1  | 1988420 | 6633  | 0.33 | 228 | k__Bacteria;p__Firmicutes;c__Bacilli;o__Lactobacillales;f__Streptococcaceae;g__Streptococcus;s__Streptococcus infantarius                 |
| MLG 932 | 4 | 13473 | 9161  | 13472 | 99.99 | gii374269796 emb  HE616528.1 | 4988504 | 14873 | 0.3  | 262 | k__Bacteria;p__Proteobacteria;c__Gammaproteobacteria;o__Enterobacteriales;f__Enterobacteriaceae;g__Shigella;s__Shigella sonnei            |
| MLG 933 | 3 | 13419 | 7155  | 9975  | 74.33 | gii619734722 gb C P007557.1  | 5099034 | 9972  | 0.2  | 267 | k__Bacteria;p__Proteobacteria;c__Gammaproteobacteria;o__Enterobacteriales;f__Enterobacteriaceae;g__Citrobacter;s__Citrobacter freundii    |
| MLG 934 | 2 | 13384 | 10770 | 3875  | 28.95 | gii183225820 dbj  AP008937.1 | 2098685 | 3875  | 0.18 | 414 | k__Bacteria;p__Firmicutes;c__Bacilli;o__Lactobacillales;f__Lactobacillaceae;g__Lactobacillus;s__Lactobacillus fermentum                   |
| MLG 935 | 5 | 13336 | 3729  | 13254 | 99.39 | gii122087364 emb  AM286415.1 | 4615899 | 24461 | 0.53 | 296 | k__Bacteria;p__Proteobacteria;c__Gammaproteobacteria;o__Enterobacteriales;f__Enterobacteriaceae;g__Yersinia;s__Yersinia enterocolitica    |
| MLG 936 | 2 | 13258 | 8232  | 0     | 0     | 0                            | -       | 0     | 0    | 0   | Unknow                                                                                                                                    |
| MLG 937 | 2 | 13238 | 11262 | 13238 | 100   | gii455418716 gb C P004345.1  | 3799539 | 13484 | 0.35 | 301 | k__Bacteria;p__Proteobacteria;c__Gammaproteobacteria;o__Enterobacteriales;f__Enterobacteriaceae;g__Morganelia;s__Morganelia morganii      |
| MLG 938 | 2 | 13169 | 10960 | 8211  | 62.35 | gii219620149 gb C P001213.1  | 1933695 | 8204  | 0.42 | 898 | k__Bacteria;p__Actinobacteria;c__Actinobacteria;o__Bifidobacteriales;f__Bifidobacteriaceae;g__Bifidobacterium;s__Bifidobacterium animalis |
| MLG 939 | 2 | 13148 | 7897  | 0     | 0     | 0                            | -       | 0     | 0    | 0   | Unknow                                                                                                                                    |
| MLG 940 | 3 | 13128 | 4886  | 0     | 0     | 0                            | -       | 0     | 0    | 0   | Unknow                                                                                                                                    |
| MLG 941 | 2 | 13115 | 8160  | 0     | 0     | 0                            | -       | 0     | 0    | 0   | Unknow                                                                                                                                    |
| MLG 942 | 3 | 13099 | 9454  | 0     | 0     | 0                            | -       | 0     | 0    | 0   | Unknow                                                                                                                                    |

|         |    |       |       |       |       |                              |         |       |      |     |                                                                                                                                                               |
|---------|----|-------|-------|-------|-------|------------------------------|---------|-------|------|-----|---------------------------------------------------------------------------------------------------------------------------------------------------------------|
| MLG 943 | 5  | 13083 | 3754  | 2723  | 20.81 | gii291548560 emb FP929055.1  | 3341681 | 2738  | 0.08 | 163 | k__Bacteria;p__Firmicutes;c__Clostridia;o__Clostridiales;f__Lachnospiraceae;g__Blautia;s__[Ruminococcus]torques                                               |
| MLG 944 | 2  | 13083 | 9914  | 0     | 0     | 0                            | -       | 0     | 0    | 0   | Unknow                                                                                                                                                        |
| MLG 945 | 2  | 13065 | 9441  | 8494  | 65.01 | gii365906294 gb C P003218.1  | 5974109 | 8734  | 0.15 | 12  | k__Bacteria;p__Proteobacteria;c__Gammaproteobacteria;o__Enterobacteriales;f__Enterobacteriaceae;g__Klebsiella;s__Klebsiella oxytoca                           |
| MLG 946 | 4  | 13044 | 7526  | 13044 | 100   | gii219620149 gb C P001213.1  | 1933695 | 13136 | 0.68 | 898 | k__Bacteria;p__Actinobacteria;c__Actinobacteria;o__Bifidobacteriales;f__Bifidobacteriaceae;g__Bifidobacterium;s__Bifidobacterium animalis                     |
| MLG 947 | 2  | 13021 | 10566 | 7931  | 60.91 | gii386922183 gb C P001560.1  | 4158725 | 7979  | 0.19 | 273 | k__Bacteria;p__Proteobacteria;c__Gammaproteobacteria;o__Enterobacteriales;f__Enterobacteriaceae;g__Shimwellia;s__Shimwellia blattae                           |
| MLG 948 | 3  | 13018 | 11030 | 11009 | 84.57 | gii440045023 gb C P003938.1  | 4762179 | 11266 | 0.24 | 3   | k__Bacteria;p__Proteobacteria;c__Gammaproteobacteria;o__Enterobacteriales;f__Enterobacteriaceae;g__Unclassified;s__Enterobacteriaceae bacterium strain FGI 57 |
| MLG 949 | 2  | 12997 | 8680  | 4250  | 32.7  | gii602758695 gb C P007270.1  | 4942215 | 4931  | 0.1  | 5   | k__Bacteria;p__Proteobacteria;c__Gammaproteobacteria;o__Enterobacteriales;f__Enterobacteriaceae;g__Salmonella;s__Salmonella enterica                          |
| MLG 950 | 2  | 12972 | 9378  | 9378  | 72.29 | gii218430358 emb C U928163.2 | 5202090 | 9378  | 0.18 | 1   | k__Bacteria;p__Proteobacteria;c__Gammaproteobacteria;o__Enterobacteriales;f__Enterobacteriaceae;g__Escherichia;s__Escherichia coli                            |
| MLG 951 | 2  | 12968 | 8081  | 11194 | 86.32 | gii573966439 gb C P006027.1  | 5585613 | 11197 | 0.2  | 1   | k__Bacteria;p__Proteobacteria;c__Gammaproteobacteria;o__Enterobacteriales;f__Enterobacteriaceae;g__Escherichia;s__Escherichia coli                            |
| MLG 952 | 2  | 12967 | 7906  | 8643  | 66.65 | gii602773583 gb C P007273.1  | 5052173 | 8300  | 0.16 | 5   | k__Bacteria;p__Proteobacteria;c__Gammaproteobacteria;o__Enterobacteriales;f__Enterobacteriaceae;g__Salmonella;s__Salmonella enterica                          |
| MLG 953 | 2  | 12949 | 12349 | 12349 | 95.37 | gii284919779 emb FN554766.1  | 5241977 | 13475 | 0.26 | 1   | k__Bacteria;p__Proteobacteria;c__Gammaproteobacteria;o__Enterobacteriales;f__Enterobacteriaceae;g__Escherichia;s__Escherichia coli                            |
| MLG 954 | 3  | 12945 | 5275  | 12941 | 99.97 | gii569535620 gb C P007025.1  | 4701875 | 14882 | 0.32 | 264 | k__Bacteria;p__Proteobacteria;c__Gammaproteobacteria;o__Enterobacteriales;f__Enterobacteriaceae;g__Escherichia;s__Escherichia albertii                        |
| MLG 955 | 30 | 12907 | 916   | 0     | 0     | 0                            | -       | 0     | 0    | 0   | Unknow                                                                                                                                                        |
| MLG 956 | 6  | 12863 | 4260  | 9758  | 75.86 | gii301154649 emb FQ312002.1  | 2086875 | 9758  | 0.47 | 419 | k__Bacteria;p__Proteobacteria;c__Gammaproteobacteria;o__Pasteurellales;f__Pasteurellaceae;g__Haemophilus;s__Haemophilus parainfluenzae                        |
| MLG 957 | 2  | 12855 | 6900  | 0     | 0     | 0                            | -       | 0     | 0    | 0   | Unknow                                                                                                                                                        |
| MLG 958 | 2  | 12768 | 10451 | 10989 | 86.07 | gii526125113 gb C P006608.1  | 4683551 | 11168 | 0.24 | 13  | k__Bacteria;p__Proteobacteria;c__Gammaproteobacteria;o__Enterobacteriales;f__Enterobacteriaceae;g__Salmonella;s__Salmonella bongori                           |
| MLG 959 | 3  | 12734 | 7500  | 12734 | 100   | gii569535620 gb C P007025.1  | 4701875 | 12733 | 0.27 | 264 | k__Bacteria;p__Proteobacteria;c__Gammaproteobacteria;o__Enterobacteriales;f__Enterobacteriaceae;g__Escherichia;s__Escherichia albertii                        |
| MLG 960 | 2  | 12706 | 9176  | 9176  | 72.22 | gii150953431 gb C P000647.1  | 5315120 | 9176  | 0.17 | 7   | k__Bacteria;p__Proteobacteria;c__Gammaproteobacteria;o__Enterobacteriales;f__Enterobacteriaceae;g__Klebsiella;s__Klebsiella pneumoniae                        |
| MLG 961 | 2  | 12655 | 6872  | 12655 | 100   | gii281177210 dbj AP009378.1  | 4717338 | 12655 | 0.27 | 1   | k__Bacteria;p__Proteobacteria;c__Gammaproteobacteria;o__Enterobacteriales;f__Enterobacteriaceae;g__Escherichia;s__Escherichia coli                            |
| MLG 962 | 2  | 12648 | 11490 | 5538  | 43.79 | gii697784296 gb C P009610.1  | 1850897 | 5537  | 0.3  | 164 | k__Bacteria;p__Proteobacteria;c__Gammaproteobacteria;o__Pasteurellales;f__Pasteurellaceae;g__Haemophilus;s__Haemophilus influenzae                            |
| MLG 963 | 2  | 12639 | 6344  | 4289  | 33.93 | gii145562801 gb C P000681.1  | 4659220 | 4289  | 0.09 | 836 | k__Bacteria;p__Proteobacteria;c__Gammaproteobacteria;o__Alteromonadales;f__Shewanellaceae;g__Shewanella;s__Shewanella putrefaciens                            |
| MLG 964 | 2  | 12623 | 11299 | 4814  | 38.14 | gii218354981 emb C U928158.2 | 4588711 | 4907  | 0.11 | 2   | k__Bacteria;p__Proteobacteria;c__Gammaproteobacteria;o__Enterobacteriales;f__Enterobacteriaceae;g__Escherichia;s__Escherichia fergusonii                      |
| MLG 965 | 8  | 12608 | 2481  | 0     | 0     | 0                            | -       | 0     | 0    | 0   | Unknow                                                                                                                                                        |
| MLG 966 | 2  | 12586 | 8957  | 8957  | 71.17 | gii309700213 emb FN649414.1  | 5153435 | 8958  | 0.17 | 1   | k__Bacteria;p__Proteobacteria;c__Gammaproteobacteria;o__Enterobacteriales;f__Enterobacteriaceae;g__Escherichia;s__Escherichia coli                            |
| MLG 967 | 11 | 12513 | 4974  | 9340  | 74.64 | gii329666391 gb C P002464.1  | 1966342 | 1916  | 0.1  | 193 | k__Bacteria;p__Firmicutes;c__Bacilli;o__Lactobacillales;f__Lactobacillaceae;g__Lactobacillus;s__Lactobacillus johnsonii                                       |
| MLG 968 | 2  | 12479 | 10215 | 0     | 0     | 0                            | -       | 0     | 0    | 0   | Unknow                                                                                                                                                        |
| MLG 969 | 6  | 12452 | 3336  | 0     | 0     | 0                            | -       | 0     | 0    | 0   | Unknow                                                                                                                                                        |

|         |    |       |       |       |       |                              |         |       |      |     |                                                                                                                                           |
|---------|----|-------|-------|-------|-------|------------------------------|---------|-------|------|-----|-------------------------------------------------------------------------------------------------------------------------------------------|
| MLG 970 | 2  | 12442 | 11773 | 10727 | 86.22 | gii169147133 embl CU459141.1 | 3936291 | 14903 | 0.38 | 552 | k__Bacteria;p__Proteobacteria;c__Gammaproteobacteria;o__Pseudomonadales;f__Moraxellaceae;g__Acinetobacter;s__Acinetobacter baumannii      |
| MLG 971 | 2  | 12390 | 9148  | 11396 | 91.98 | gii170517292 gb CP000970.1   | 5068389 | 11396 | 0.22 | 1   | k__Bacteria;p__Proteobacteria;c__Gammaproteobacteria;o__Enterobacteriales;f__Enterobacteriaceae;g__Escherichia;s__Escherichia coli        |
| MLG 972 | 10 | 12379 | 2724  | 0     | 0     | 0                            | -       | 0     | 0    | 0   | Unknow                                                                                                                                    |
| MLG 973 | 2  | 12232 | 8427  | 2003  | 16.38 | gii662712225 gb CP008823.1   | 4852980 | 4006  | 0.08 | 4   | k__Bacteria;p__Proteobacteria;c__Gammaproteobacteria;o__Enterobacteriales;f__Enterobacteriaceae;g__Enterobacter;s__Enterobacter cloacae   |
| MLG 974 | 8  | 12187 | 2448  | 12167 | 99.84 | gii125496804 gb CP000387.1   | 2388435 | 12160 | 0.51 | 409 | k__Bacteria;p__Firmicutes;c__Bacilli;o__Lactobacillales;f__Streptococcaceae;g__Streptococcus;s__Streptococcus sanguinis                   |
| MLG 975 | 2  | 12171 | 8314  | 9906  | 81.39 | gii169752989 gb CP000946.1   | 4746218 | 14501 | 0.31 | 1   | k__Bacteria;p__Proteobacteria;c__Gammaproteobacteria;o__Enterobacteriales;f__Enterobacteriaceae;g__Escherichia;s__Escherichia coli        |
| MLG 976 | 2  | 12171 | 9214  | 0     | 0     | 0                            | -       | 0     | 0    | 0   | Unknow                                                                                                                                    |
| MLG 977 | 2  | 12151 | 8244  | 7867  | 64.74 | gii257762509 dbj AP010960.1  | 5371077 | 8176  | 0.15 | 1   | k__Bacteria;p__Proteobacteria;c__Gammaproteobacteria;o__Enterobacteriales;f__Enterobacteriaceae;g__Escherichia;s__Escherichia coli        |
| MLG 978 | 2  | 12119 | 9327  | 10276 | 84.79 | gii41584196 gb AE017198.1    | 1992676 | 11219 | 0.56 | 193 | k__Bacteria;p__Firmicutes;c__Bacilli;o__Lactobacillales;f__Lactobacillaceae;g__Lactobacillus;s__Lactobacillus johnsonii                   |
| MLG 979 | 2  | 12090 | 7371  | 0     | 0     | 0                            | -       | 0     | 0    | 0   | Unknow                                                                                                                                    |
| MLG 980 | 2  | 12084 | 11432 | 11266 | 93.23 | gii295054830 gb CP001918.1   | 5314581 | 11275 | 0.21 | 4   | k__Bacteria;p__Proteobacteria;c__Gammaproteobacteria;o__Enterobacteriales;f__Enterobacteriaceae;g__Enterobacter;s__Enterobacter cloacae   |
| MLG 981 | 24 | 12064 | 668   | 0     | 0     | 0                            | -       | 0     | 0    | 0   | Unknow                                                                                                                                    |
| MLG 982 | 3  | 12040 | 4754  | 8426  | 69.98 | gii443901024 embl FO203355.1 | 5419609 | 9084  | 0.17 | 15  | k__Bacteria;p__Proteobacteria;c__Gammaproteobacteria;o__Enterobacteriales;f__Enterobacteriaceae;g__Enterobacter;s__Enterobacter aerogenes |
| MLG 983 | 7  | 12027 | 3618  | 0     | 0     | 0                            | -       | 0     | 0    | 0   | Unknow                                                                                                                                    |
| MLG 984 | 2  | 12012 | 8860  | 8860  | 73.76 | gii640850664 gb CP007731.1   | 5241638 | 28291 | 0.54 | 7   | k__Bacteria;p__Proteobacteria;c__Gammaproteobacteria;o__Enterobacteriales;f__Enterobacteriaceae;g__Klebsiella;a__Klebsiella pneumoniae    |
| MLG 985 | 2  | 12002 | 6330  | 10381 | 86.49 | gii157081501 gb CP000822.1   | 4720462 | 10998 | 0.23 | 6   | k__Bacteria;p__Proteobacteria;c__Gammaproteobacteria;o__Enterobacteriales;f__Enterobacteriaceae;g__Citrobacter;s__Citrobacter koseri      |
| MLG 986 | 3  | 11951 | 5456  | 5152  | 43.11 | gii527122546 gb CP003025.1   | 1975547 | 5166  | 0.26 | 207 | k__Bacteria;p__Firmicutes;c__Bacilli;o__Lactobacillales;f__Streptococcaceae;g__Streptococcus;s__Streptococcus lutetiensis                 |
| MLG 987 | 4  | 11909 | 6618  | 1421  | 11.93 | gii537631739 gb CP003859.1   | 1991156 | 1421  | 0.07 | 374 | k__Bacteria;p__Firmicutes;c__Bacilli;o__Lactobacillales;f__Streptococcaceae;g__Streptococcus;s__Streptococcus constellatus                |
| MLG 988 | 4  | 11893 | 7507  | 10652 | 89.57 | gii667688329 gb CP007588.1   | 1355853 | 10648 | 0.79 | 457 | k__Bacteria;p__Firmicutes;c__Bacilli;o__Lactobacillales;f__Leuconostocaceae;g__Weissella;s__Weissella ceti                                |
| MLG 989 | 2  | 11893 | 9278  | 11306 | 95.06 | gii569535620 gb CP007025.1   | 4701875 | 11905 | 0.25 | 264 | k__Bacteria;p__Proteobacteria;c__Gammaproteobacteria;o__Enterobacteriales;f__Enterobacteriaceae;g__Escherichia;s__Escherichia albertii    |
| MLG 990 | 2  | 11886 | 7560  | 2804  | 23.59 | gii288887617 gb CP001891.1   | 5458505 | 2801  | 0.05 | 10  | k__Bacteria;p__Proteobacteria;c__Gammaproteobacteria;o__Enterobacteriales;f__Enterobacteriaceae;g__Klebsiella;a__Klebsiella varicola      |
| MLG 991 | 12 | 11799 | 1682  | 0     | 0     | 0                            | -       | 0     | 0    | 0   | Unknow                                                                                                                                    |
| MLG 992 | 2  | 11784 | 7073  | 7073  | 60.02 | gii206564770 gb CP000964.1   | 5641239 | 11193 | 0.2  | 7   | k__Bacteria;p__Proteobacteria;c__Gammaproteobacteria;o__Enterobacteriales;f__Enterobacteriaceae;g__Klebsiella;a__Klebsiella pneumoniae    |
| MLG 993 | 2  | 11767 | 10060 | 10060 | 85.49 | gii218363708 embl CU928161.2 | 5032268 | 10060 | 0.2  | 1   | k__Bacteria;p__Proteobacteria;c__Gammaproteobacteria;o__Enterobacteriales;f__Enterobacteriaceae;g__Escherichia;s__Escherichia coli        |
| MLG 994 | 2  | 11740 | 8826  | 8826  | 75.18 | gii284919779 embl FN554766.1 | 5241977 | 11486 | 0.22 | 1   | k__Bacteria;p__Proteobacteria;c__Gammaproteobacteria;o__Enterobacteriales;f__Enterobacteriaceae;g__Escherichia;s__Escherichia coli        |
| MLG 995 | 7  | 11728 | 4462  | 11407 | 97.26 | gii29350190 gb AE016830.1    | 3218031 | 11886 | 0.37 | 72  | k__Bacteria;p__Firmicutes;c__Bacilli;o__Lactobacillales;f__Enterococcaceae;g__Enterococcus;s__Enterococcus faecalis                       |
| MLG 996 | 2  | 11523 | 8590  | 11523 | 100   | gii110341805 gb CP000247.1   | 4938920 | 11522 | 0.23 | 1   | k__Bacteria;p__Proteobacteria;c__Gammaproteobacteria;o__Enterobacteriales;f__Enterobacteriaceae;g__Escherichia;s__Escherichia coli        |

|          |   |       |       |       |       |                              |          |       |      |     |                                                                                                                                         |
|----------|---|-------|-------|-------|-------|------------------------------|----------|-------|------|-----|-----------------------------------------------------------------------------------------------------------------------------------------|
| MLG 997  | 2 | 11493 | 8571  | 4612  | 40.13 | gi 169752989 gb C P000946.1  | 47462 18 | 4861  | 0.1  | 1   | k__Bacteria;p__Proteobacteria;c__Gammaproteobacteria;o__Enterobacteriales;f__Enterobacteriaceae;g__Escherichia;s__Escherichia coli      |
| MLG 998  | 3 | 11476 | 5546  | 5546  | 48.33 | gi 660567586 gb C P008788.1  | 61521 90 | 5589  | 0.09 | 12  | k__Bacteria;p__Proteobacteria;c__Gammaproteobacteria;o__Enterobacteriales;f__Enterobacteriaceae;g__Klebsiella;s__Klebsiella oxytoca     |
| MLG 999  | 2 | 11448 | 8131  | 0     | 0     | 0                            | -        | 0     | 0    | 0   | Unknow                                                                                                                                  |
| MLG 1000 | 2 | 11430 | 9985  | 10161 | 88.9  | gi 81244029 gb CP 000036.1   | 45198 23 | 10237 | 0.23 | 263 | k__Bacteria;p__Proteobacteria;c__Gammaproteobacteria;o__Enterobacteriales;f__Enterobacteriaceae;g__Shigella;s__Shigella boydii          |
| MLG 1001 | 2 | 11428 | 10989 | 437   | 3.82  | gi 262396937 emb  FN298497.1 | 17559 93 | 431   | 0.02 | 193 | k__Bacteria;p__Firmicutes;c__Bacilli;o__Lactobacillales;f__Lactobacillaceae;g__Lactobacillus;s__Lactobacillus johnsonii                 |
| MLG 1002 | 7 | 11427 | 3586  | 0     | 0     | 0                            | -        | 0     | 0    | 0   | Unknow                                                                                                                                  |
| MLG 1003 | 2 | 11425 | 9301  | 9454  | 82.75 | gi 110341805 gb C P000247.1  | 49389 20 | 8135  | 0.16 | 1   | k__Bacteria;p__Proteobacteria;c__Gammaproteobacteria;o__Enterobacteriales;f__Enterobacteriaceae;g__Escherichia;s__Escherichia coli      |
| MLG 1004 | 5 | 11414 | 6340  | 6340  | 55.55 | gi 334281572 dbj  AP012054.1 | 21000 77 | 6340  | 0.3  | 368 | k__Bacteria;p__Firmicutes;c__Bacilli;o__Lactobacillales;f__Streptococcaceae;g__Streptococcus;s__Streptococcus pasteurianus              |
| MLG 1005 | 7 | 11407 | 3089  | 0     | 0     | 0                            | -        | 0     | 0    | 0   | Unknow                                                                                                                                  |
| MLG 1006 | 2 | 11391 | 8511  | 2475  | 21.73 | gi 595583568 gb C P007265.1  | 47586 29 | 2480  | 0.05 | 1   | k__Bacteria;p__Proteobacteria;c__Gammaproteobacteria;o__Enterobacteriales;f__Enterobacteriaceae;g__Escherichia;s__Escherichia coli      |
| MLG 1007 | 3 | 11331 | 4758  | 10050 | 88.69 | gi 400173048 gb C P003737.1  | 47265 82 | 12643 | 0.27 | 4   | k__Bacteria;p__Proteobacteria;c__Gammaproteobacteria;o__Enterobacteriales;f__Enterobacteriaceae;g__Enterobacter;s__Enterobacter cloacae |
| MLG 1008 | 2 | 11317 | 8266  | 9109  | 80.49 | gi 294489418 gb C P001969.1  | 51083 83 | 6940  | 0.14 | 1   | k__Bacteria;p__Proteobacteria;c__Gammaproteobacteria;o__Enterobacteriales;f__Enterobacteriaceae;g__Escherichia;s__Escherichia coli      |
| MLG 1009 | 2 | 11302 | 5955  | 10072 | 89.12 | gi 157081501 gb C P000822.1  | 47204 62 | 10154 | 0.22 | 6   | k__Bacteria;p__Proteobacteria;c__Gammaproteobacteria;o__Enterobacteriales;f__Enterobacteriaceae;g__Citrobacter;s__Citrobacter koseri    |
| MLG 1010 | 3 | 11296 | 5670  | 10488 | 92.85 | gi 209157093 gb C P001164.1  | 55720 75 | 8072  | 0.14 | 1   | k__Bacteria;p__Proteobacteria;c__Gammaproteobacteria;o__Enterobacteriales;f__Enterobacteriaceae;g__Escherichia;s__Escherichia coli      |
| MLG 1011 | 8 | 11273 | 5903  | 2464  | 21.86 | gi 188497817 gb C P001078.1  | 36596 44 | 2555  | 0.07 | 20  | k__Bacteria;p__Firmicutes;c__Clostridia;o__Clostridiales;f__Clostridiaceae;g__Clostridium;s__Clostridium botulinum                      |
| MLG 1012 | 2 | 11239 | 10163 | 9783  | 87.05 | gi 374672113 dbj  AP012281.1 | 24214 71 | 9788  | 0.4  | 88  | k__Bacteria;p__Firmicutes;c__Bacilli;o__Lactobacillales;f__Streptococcaceae;g__Lactococcus;s__Lactococcus lactis                        |
| MLG 1013 | 2 | 11233 | 10901 | 10624 | 94.58 | gi 124491690 emb  AM406671.1 | 25294 78 | 10850 | 0.43 | 88  | k__Bacteria;p__Firmicutes;c__Bacilli;o__Lactobacillales;f__Streptococcaceae;g__Lactococcus;s__Lactococcus lactis                        |
| MLG 1014 | 2 | 11224 | 6090  | 0     | 0     | 0                            | -        | 0     | 0    | 0   | Unknow                                                                                                                                  |
| MLG 1015 | 2 | 11216 | 9077  | 9479  | 84.51 | gi 410816915 gb C P003917.1  | 46438 44 | 7559  | 0.16 | 437 | k__Bacteria;p__Proteobacteria;c__Gammaproteobacteria;o__Alteromonadales;f__Alteromonadaceae;g__Alteromonas;s__Alteromonas macleodii     |
| MLG 1016 | 2 | 11213 | 6680  | 0     | 0     | 0                            | -        | 0     | 0    | 0   | Unknow                                                                                                                                  |
| MLG 1017 | 2 | 11164 | 7376  | 6862  | 61.47 | gi 281599365 gb C P001383.1  | 46508 56 | 8781  | 0.19 | 261 | k__Bacteria;p__Proteobacteria;c__Gammaproteobacteria;o__Enterobacteriales;f__Enterobacteriaceae;g__Shigella;s__Shigella flexneri        |
| MLG 1018 | 2 | 11158 | 9529  | 6054  | 54.26 | gi 209157093 gb C P001164.1  | 55720 75 | 6053  | 0.11 | 1   | k__Bacteria;p__Proteobacteria;c__Gammaproteobacteria;o__Enterobacteriales;f__Enterobacteriaceae;g__Escherichia;s__Escherichia coli      |
| MLG 1019 | 3 | 11136 | 9423  | 1358  | 12.19 | gi 343179174 dbj  AP009332.1 | 19501 35 | 1359  | 0.07 | 365 | k__Bacteria;p__Firmicutes;c__Bacilli;o__Lactobacillales;f__Streptococcaceae;g__Lactococcus;s__Lactococcus garvieae                      |
| MLG 1020 | 2 | 11129 | 5971  | 11129 | 100   | gi 218430358 emb  CU928163.2 | 52020 90 | 11130 | 0.21 | 1   | k__Bacteria;p__Proteobacteria;c__Gammaproteobacteria;o__Enterobacteriales;f__Enterobacteriaceae;g__Escherichia;s__Escherichia coli      |
| MLG 1021 | 3 | 11099 | 10359 | 189   | 1.7   | gi 569535620 gb C P007025.1  | 47018 75 | 189   | 0    | 264 | k__Bacteria;p__Proteobacteria;c__Gammaproteobacteria;o__Enterobacteriales;f__Enterobacteriaceae;g__Escherichia;s__Escherichia albertii  |
| MLG 1022 | 2 | 11031 | 9282  | 0     | 0     | 0                            | -        | 0     | 0    | 0   | Unknow                                                                                                                                  |
| MLG 1023 | 3 | 11005 | 5555  | 0     | 0     | 0                            | -        | 0     | 0    | 0   | Unknow                                                                                                                                  |

|          |    |       |      |       |       |                             |         |       |      |     |                                                                                                                                         |
|----------|----|-------|------|-------|-------|-----------------------------|---------|-------|------|-----|-----------------------------------------------------------------------------------------------------------------------------------------|
| MLG 1024 | 2  | 10991 | 5737 | 0     | 0     | 0                           | -       | 0     | 0    | 0   | Unknown                                                                                                                                 |
| MLG 1025 | 2  | 10942 | 6834 | 10924 | 99.84 | gii281177210 dbj AP009378.1 | 4717338 | 10931 | 0.23 | 1   | k__Bacteria;p__Proteobacteria;c__Gammaproteobacteria;o__Enterobacteriales;f__Enterobacteriaceae;g__Escherichia;s__Escherichia coli      |
| MLG 1026 | 2  | 10924 | 8849 | 5209  | 47.68 | gii451908558 gb C P004027.1 | 4634161 | 5459  | 0.12 | 5   | k__Bacteria;p__Proteobacteria;c__Gammaproteobacteria;o__Enterobacteriales;f__Enterobacteriaceae;g__Salmonella;s__Salmonella enterica    |
| MLG 1027 | 2  | 10921 | 5688 | 0     | 0     | 0                           | -       | 0     | 0    | 0   | Unknown                                                                                                                                 |
| MLG 1028 | 3  | 10903 | 5647 | 2463  | 22.59 | gii150953431 gb C P000647.1 | 5315120 | 2462  | 0.05 | 7   | k__Bacteria;p__Proteobacteria;c__Gammaproteobacteria;o__Enterobacteriales;f__Enterobacteriaceae;g__Klebsiella;s__Klebsiella pneumoniae  |
| MLG 1029 | 5  | 10889 | 5160 | 9118  | 83.74 | gii662706586 gb C P008841.1 | 5865090 | 12327 | 0.21 | 12  | k__Bacteria;p__Proteobacteria;c__Gammaproteobacteria;o__Enterobacteriales;f__Enterobacteriaceae;g__Klebsiella;s__Klebsiella oxytoca     |
| MLG 1030 | 7  | 10869 | 4091 | 0     | 0     | 0                           | -       | 0     | 0    | 0   | Unknown                                                                                                                                 |
| MLG 1031 | 3  | 10865 | 9048 | 0     | 0     | 0                           | -       | 0     | 0    | 0   | Unknown                                                                                                                                 |
| MLG 1032 | 2  | 10849 | 6297 | 0     | 0     | 0                           | -       | 0     | 0    | 0   | Unknown                                                                                                                                 |
| MLG 1033 | 3  | 10848 | 5717 | 10848 | 100   | gii157065147 gb C P000802.1 | 4643538 | 10847 | 0.23 | 1   | k__Bacteria;p__Proteobacteria;c__Gammaproteobacteria;o__Enterobacteriales;f__Enterobacteriaceae;g__Escherichia;s__Escherichia coli      |
| MLG 1034 | 3  | 10840 | 6996 | 9249  | 85.32 | gii526125113 gb C P006608.1 | 4683551 | 7947  | 0.17 | 13  | k__Bacteria;p__Proteobacteria;c__Gammaproteobacteria;o__Enterobacteriales;f__Enterobacteriaceae;g__Salmonella;s__Salmonella bongori     |
| MLG 1035 | 4  | 10829 | 5645 | 0     | 0     | 0                           | -       | 0     | 0    | 0   | Unknown                                                                                                                                 |
| MLG 1036 | 3  | 10800 | 4976 | 0     | 0     | 0                           | -       | 0     | 0    | 0   | Unknown                                                                                                                                 |
| MLG 1037 | 4  | 10793 | 7550 | 4720  | 43.73 | gii295054830 gb C P001918.1 | 5314581 | 4720  | 0.09 | 4   | k__Bacteria;p__Proteobacteria;c__Gammaproteobacteria;o__Enterobacteriales;f__Enterobacteriaceae;g__Enterobacter;s__Enterobacter cloacae |
| MLG 1038 | 12 | 10779 | 1622 | 10779 | 100   | gii689262542 gb C P009451.1 | 4876443 | 10887 | 0.22 | 19  | k__Bacteria;p__Proteobacteria;c__Gammaproteobacteria;o__Enterobacteriales;f__Enterobacteriaceae;g__Cedecea;s__Cedecea neteri            |
| MLG 1039 | 2  | 10768 | 6337 | 0     | 0     | 0                           | -       | 0     | 0    | 0   | Unknown                                                                                                                                 |
| MLG 1040 | 2  | 10761 | 8233 | 7060  | 65.61 | gii325177128 emb FR824043.1 | 2356444 | 6763  | 0.29 | 373 | k__Bacteria;p__Firmicutes;c__Bacilli;o__Lactobacillales;f__Streptococcaceae;g__Streptococcus;s__Streptococcus gallolyticus              |
| MLG 1041 | 3  | 10757 | 4861 | 10697 | 99.44 | gii478439721 gb C P004856.1 | 3427276 | 10712 | 0.31 | 363 | k__Bacteria;p__Firmicutes;c__Bacilli;o__Lactobacillales;f__Enterococcaceae;g__Enterococcus;s__Enterococcus casseliflavus                |
| MLG 1042 | 2  | 10750 | 7811 | 10567 | 98.3  | gii374269796 emb HE616528.1 | 4988504 | 15387 | 0.31 | 262 | k__Bacteria;p__Proteobacteria;c__Gammaproteobacteria;o__Enterobacteriales;f__Enterobacteriaceae;g__Shigella;s__Shigella sonnei          |
| MLG 1043 | 15 | 10749 | 1440 | 0     | 0     | 0                           | -       | 0     | 0    | 0   | Unknown                                                                                                                                 |
| MLG 1044 | 2  | 10747 | 8110 | 10747 | 100   | gii209157093 gb C P001164.1 | 5572075 | 10747 | 0.19 | 1   | k__Bacteria;p__Proteobacteria;c__Gammaproteobacteria;o__Enterobacteriales;f__Enterobacteriaceae;g__Escherichia;s__Escherichia coli      |
| MLG 1045 | 2  | 10739 | 5556 | 0     | 0     | 0                           | -       | 0     | 0    | 0   | Unknown                                                                                                                                 |
| MLG 1046 | 2  | 10738 | 5700 | 10552 | 98.27 | gii571260215 emb HF571988.1 | 4940199 | 11213 | 0.23 | 296 | k__Bacteria;p__Proteobacteria;c__Gammaproteobacteria;o__Enterobacteriales;f__Enterobacteriaceae;g__Yersinia;s__Yersinia enterocolitica  |
| MLG 1047 | 7  | 10730 | 2932 | 10730 | 100   | gii689262542 gb C P009451.1 | 4876443 | 10730 | 0.22 | 19  | k__Bacteria;p__Proteobacteria;c__Gammaproteobacteria;o__Enterobacteriales;f__Enterobacteriaceae;g__Cedecea;s__Cedecea neteri            |
| MLG 1048 | 2  | 10723 | 7623 | 7422  | 69.22 | gii365906294 gb C P003218.1 | 5974109 | 6583  | 0.11 | 12  | k__Bacteria;p__Proteobacteria;c__Gammaproteobacteria;o__Enterobacteriales;f__Enterobacteriaceae;g__Klebsiella;s__Klebsiella oxytoca     |
| MLG 1049 | 2  | 10723 | 9892 | 6687  | 62.36 | gii169887498 gb C P000948.1 | 4686137 | 6687  | 0.14 | 1   | k__Bacteria;p__Proteobacteria;c__Gammaproteobacteria;o__Enterobacteriales;f__Enterobacteriaceae;g__Escherichia;s__Escherichia coli      |
| MLG 1050 | 5  | 10701 | 2988 | 10698 | 99.97 | gii110673209 gb C P000246.1 | 3256683 | 9205  | 0.28 | 21  | k__Bacteria;p__Firmicutes;c__Clostridia;o__Clostridiales;f__Clostridiaceae;g__Clostridium;s__Clostridium perfringens                    |

|          |    |       |      |       |       |                             |         |       |      |     |                                                                                                                                            |
|----------|----|-------|------|-------|-------|-----------------------------|---------|-------|------|-----|--------------------------------------------------------------------------------------------------------------------------------------------|
| MLG 1051 | 4  | 10672 | 6827 | 0     | 0     | 0                           | -       | 0     | 0    | 0   | Unknown                                                                                                                                    |
| MLG 1052 | 2  | 10660 | 7392 | 10660 | 100   | gii209157093 gb C P001164.1 | 5572075 | 10641 | 0.19 | 1   | k__Bacteria;p__Proteobacteria;c__Gammaproteobacteria;o__Enterobacteriales;f__Enterobacteriaceae;g__Escherichia;s__Escherichia coli         |
| MLG 1053 | 2  | 10653 | 7622 | 10653 | 100   | gii569535620 gb C P007025.1 | 4701875 | 10875 | 0.23 | 264 | k__Bacteria;p__Proteobacteria;c__Gammaproteobacteria;o__Enterobacteriales;f__Enterobacteriaceae;g__Escherichia;s__Escherichia albertii     |
| MLG 1054 | 2  | 10586 | 7500 | 10342 | 97.7  | gii342240345 emb AL935263.2 | 3308273 | 10859 | 0.33 | 385 | k__Bacteria;p__Firmicutes;c__Bacilli;o__Lactobacillales;f__Lactobacillaceae;g__Lactobacillus;s__Lactobacillus plantarum                    |
| MLG 1055 | 5  | 10533 | 3535 | 4151  | 39.41 | gii209157093 gb C P001164.1 | 5572075 | 4171  | 0.07 | 1   | k__Bacteria;p__Proteobacteria;c__Gammaproteobacteria;o__Enterobacteriales;f__Enterobacteriaceae;g__Escherichia;s__Escherichia coli         |
| MLG 1056 | 3  | 10533 | 4221 | 0     | 0     | 0                           | -       | 0     | 0    | 0   | Unknown                                                                                                                                    |
| MLG 1057 | 3  | 10531 | 8685 | 3678  | 34.93 | gii291520697 emb FP929038.1 | 3522704 | 3684  | 0.1  | 109 | k__Bacteria;p__Firmicutes;c__Clostridia;o__Clostridiales;f__Lachnospiraceae;g__Coprococcus;s__Coprococcus catus                            |
| MLG 1058 | 2  | 10498 | 5759 | 6892  | 65.65 | gii218368405 emb CU928164.2 | 5132068 | 7294  | 0.14 | 1   | k__Bacteria;p__Proteobacteria;c__Gammaproteobacteria;o__Enterobacteriales;f__Enterobacteriaceae;g__Escherichia;s__Escherichia coli         |
| MLG 1059 | 3  | 10472 | 8128 | 269   | 2.57  | gii674993598 dbj AP014630.1 | 4648418 | 269   | 0.01 | 206 | k__Bacteria;p__Proteobacteria;c__Gammaproteobacteria;o__Pseudomonadales;f__Moraxellaceae;g__Acinetobacter;s__Acinetobacter guillouiae      |
| MLG 1060 | 2  | 10451 | 7211 | 0     | 0     | 0                           | -       | 0     | 0    | 0   | Unknown                                                                                                                                    |
| MLG 1061 | 5  | 10442 | 3031 | 2350  | 22.51 | gii394343076 gb C P003683.1 | 6097032 | 2501  | 0.04 | 12  | k__Bacteria;p__Proteobacteria;c__Gammaproteobacteria;o__Enterobacteriales;f__Enterobacteriaceae;g__Klebsiella;s__Klebsiella oxytoca        |
| MLG 1062 | 3  | 10442 | 4700 | 1876  | 17.97 | gii674114364 gb C P007573.1 | 2036353 | 1932  | 0.09 | 366 | k__Bacteria;p__Firmicutes;c__Bacilli;o__Lactobacillales;f__Streptococcaceae;g__Streptococcus;s__Streptococcus anginosus                    |
| MLG 1063 | 2  | 10435 | 5546 | 10435 | 100   | gii480474683 gb C P004142.1 | 5398151 | 9949  | 0.18 | 14  | k__Bacteria;p__Proteobacteria;c__Gammaproteobacteria;o__Enterobacteriales;f__Enterobacteriaceae;g__Raoultella;s__Raoultella omithinolytica |
| MLG 1064 | 5  | 10422 | 7799 | 0     | 0     | 0                           | -       | 0     | 0    | 0   | Unknown                                                                                                                                    |
| MLG 1065 | 2  | 10411 | 7494 | 2928  | 28.12 | gii394343076 gb C P003683.1 | 6097032 | 2932  | 0.05 | 12  | k__Bacteria;p__Proteobacteria;c__Gammaproteobacteria;o__Enterobacteriales;f__Enterobacteriaceae;g__Klebsiella;s__Klebsiella oxytoca        |
| MLG 1066 | 2  | 10404 | 8963 | 0     | 0     | 0                           | -       | 0     | 0    | 0   | Unknown                                                                                                                                    |
| MLG 1067 | 2  | 10383 | 8572 | 7148  | 68.84 | gii526120653 gb C P006603.1 | 2145445 | 9784  | 0.46 | 367 | k__Bacteria;p__Firmicutes;c__Bacilli;o__Lactobacillales;f__Lactobacillaceae;g__Lactobacillus;s__Lactobacillus reuteri                      |
| MLG 1068 | 3  | 10374 | 8535 | 10374 | 100   | gii288887617 gb C P001891.1 | 5458505 | 11064 | 0.2  | 10  | k__Bacteria;p__Proteobacteria;c__Gammaproteobacteria;o__Enterobacteriales;f__Enterobacteriaceae;g__Klebsiella;s__Klebsiella variicola      |
| MLG 1069 | 2  | 10372 | 7287 | 10288 | 99.19 | gii689262542 gb C P009451.1 | 4876443 | 12660 | 0.26 | 19  | k__Bacteria;p__Proteobacteria;c__Gammaproteobacteria;o__Enterobacteriales;f__Enterobacteriaceae;g__Cedecea;s__Cedecea neteri               |
| MLG 1070 | 4  | 10361 | 3781 | 4898  | 47.27 | gii328454937 gb C P002628.1 | 2115681 | 4899  | 0.23 | 882 | k__Bacteria;p__Actinobacteria;c__Actinobacteria;o__Coriobacteriales;f__Coriobacteriaceae;g__Coriobacterium;s__Coriobacterium glomerans     |
| MLG 1071 | 2  | 10339 | 9673 | 0     | 0     | 0                           | -       | 0     | 0    | 0   | Unknown                                                                                                                                    |
| MLG 1072 | 2  | 10315 | 9640 | 0     | 0     | 0                           | -       | 0     | 0    | 0   | Unknown                                                                                                                                    |
| MLG 1073 | 3  | 10302 | 8741 | 886   | 8.6   | gii209157093 gb C P001164.1 | 5572075 | 886   | 0.02 | 1   | k__Bacteria;p__Proteobacteria;c__Gammaproteobacteria;o__Enterobacteriales;f__Enterobacteriaceae;g__Escherichia;s__Escherichia coli         |
| MLG 1074 | 4  | 10248 | 4208 | 10146 | 99    | gii374269796 emb HE616528.1 | 4988504 | 12863 | 0.26 | 262 | k__Bacteria;p__Proteobacteria;c__Gammaproteobacteria;o__Enterobacteriales;f__Enterobacteriaceae;g__Shigella;s__Shigella sonnei             |
| MLG 1075 | 21 | 10239 | 884  | 0     | 0     | 0                           | -       | 0     | 0    | 0   | Unknown                                                                                                                                    |
| MLG 1076 | 3  | 10218 | 7386 | 0     | 0     | 0                           | -       | 0     | 0    | 0   | Unknown                                                                                                                                    |
| MLG 1077 | 2  | 10213 | 9129 | 9041  | 88.52 | gii160863331 gb C P000880.1 | 4600800 | 11723 | 0.25 | 5   | k__Bacteria;p__Proteobacteria;c__Gammaproteobacteria;o__Enterobacteriales;f__Enterobacteriaceae;g__Salmonella;s__Salmonella enterica       |



|          |    |       |       |       |       |                                 |              |       |      |     |                                                                                                                                                               |
|----------|----|-------|-------|-------|-------|---------------------------------|--------------|-------|------|-----|---------------------------------------------------------------------------------------------------------------------------------------------------------------|
| MLG 1078 | 2  | 10186 | 9186  | 9917  | 97.36 | gii115511419 gb C<br>P000468.1  | 50820<br>25  | 9922  | 0.2  | 1   | k__Bacteria;p__Proteobacteria;c__Gammaproteobacteria;o__Enterobacteriales;f__Enterobacteriaceae;g__Escherichia;s__Escherichia coli                            |
| MLG 1079 | 2  | 10149 | 5879  | 2736  | 26.96 | gii619734722 gb C<br>P007557.1  | 50990<br>34  | 2806  | 0.06 | 267 | k__Bacteria;p__Proteobacteria;c__Gammaproteobacteria;o__Enterobacteriales;f__Enterobacteriaceae;g__Citrobacter;s__Citrobacter freundii                        |
| MLG 1080 | 2  | 10146 | 5799  | 0     | 0     | 0                               | -            | 0     | 0    | 0   | Unknow                                                                                                                                                        |
| MLG 1081 | 2  | 10144 | 9735  | 10079 | 99.36 | gii345091121 gb C<br>P003026.1  | 48128<br>33  | 11088 | 0.23 | 9   | k__Bacteria;p__Proteobacteria;c__Gammaproteobacteria;o__Enterobacteriales;f__Enterobacteriaceae;g__Enterobacter;s__Enterobacter asburiae                      |
| MLG 1082 | 4  | 10144 | 3608  | 9919  | 97.78 | gii116098028 gb C<br>P000416.1  | 22912<br>20  | 9917  | 0.43 | 400 | k__Bacteria;p__Firmicutes;c__Bacilli;o__Lactobacillales;f__Lactobacillaceae;g__Lactobacillus;s__Lactobacillus brevis                                          |
| MLG 1083 | 2  | 10136 | 6109  | 3250  | 32.06 | gii332341332 gb C<br>P002729.1  | 51864<br>16  | 4123  | 0.08 | 1   | k__Bacteria;p__Proteobacteria;c__Gammaproteobacteria;o__Enterobacteriales;f__Enterobacteriaceae;g__Escherichia;s__Escherichia coli                            |
| MLG 1084 | 2  | 10109 | 7866  | 10109 | 100   | gii480474683 gb C<br>P004142.1  | 53981<br>51  | 10729 | 0.2  | 14  | k__Bacteria;p__Proteobacteria;c__Gammaproteobacteria;o__Enterobacteriales;f__Enterobacteriaceae;g__Raoultella;s__Raoultella omithinolytica                    |
| MLG 1085 | 2  | 10094 | 5568  | 2428  | 24.05 | gii383101383 gb C<br>P002291.1  | 49352<br>94  | 2419  | 0.05 | 1   | k__Bacteria;p__Proteobacteria;c__Gammaproteobacteria;o__Enterobacteriales;f__Enterobacteriaceae;g__Escherichia;s__Escherichia coli                            |
| MLG 1086 | 2  | 10093 | 9341  | 10042 | 99.49 | gii115511419 gb C<br>P000468.1  | 50820<br>25  | 10043 | 0.2  | 1   | k__Bacteria;p__Proteobacteria;c__Gammaproteobacteria;o__Enterobacteriales;f__Enterobacteriaceae;g__Escherichia;s__Escherichia coli                            |
| MLG 1087 | 2  | 10073 | 7825  | 8772  | 87.08 | gii682108593 gb C<br>P008897.1  | 46334<br>073 | 7593  | 0.16 | 4   | k__Bacteria;p__Proteobacteria;c__Gammaproteobacteria;o__Enterobacteriales;f__Enterobacteriaceae;g__Enterobacter;s__Enterobacter cloacae                       |
| MLG 1088 | 22 | 10071 | 666   | 0     | 0     | 0                               | -            | 0     | 0    | 0   | Unknow                                                                                                                                                        |
| MLG 1089 | 3  | 10071 | 4571  | 6664  | 66.17 | gii619734722 gb C<br>P007557.1  | 50990<br>34  | 6656  | 0.13 | 267 | k__Bacteria;p__Proteobacteria;c__Gammaproteobacteria;o__Enterobacteriales;f__Enterobacteriaceae;g__Citrobacter;s__Citrobacter freundii                        |
| MLG 1090 | 5  | 10066 | 2582  | 6949  | 69.03 | gii440045023 gb C<br>P003938.1  | 47621<br>79  | 6932  | 0.15 | 3   | k__Bacteria;p__Proteobacteria;c__Gammaproteobacteria;o__Enterobacteriales;f__Enterobacteriaceae;g__Unclassified;s__Enterobacteriaceae bacterium strain FGI 57 |
| MLG 1091 | 2  | 10064 | 6179  | 5804  | 57.67 | gii215263233 emb <br>FM180568.1 | 49655<br>53  | 5806  | 0.12 | 1   | k__Bacteria;p__Proteobacteria;c__Gammaproteobacteria;o__Enterobacteriales;f__Enterobacteriaceae;g__Escherichia;s__Escherichia coli                            |
| MLG 1092 | 2  | 10042 | 5180  | 4979  | 49.58 | gii295054830 gb C<br>P001918.1  | 53145<br>81  | 5906  | 0.11 | 4   | k__Bacteria;p__Proteobacteria;c__Gammaproteobacteria;o__Enterobacteriales;f__Enterobacteriaceae;g__Enterobacter;s__Enterobacter cloacae                       |
| MLG 1093 | 2  | 10041 | 5852  | 5852  | 58.28 | gii295054830 gb C<br>P001918.1  | 53145<br>81  | 5894  | 0.11 | 4   | k__Bacteria;p__Proteobacteria;c__Gammaproteobacteria;o__Enterobacteriales;f__Enterobacteriaceae;g__Enterobacter;s__Enterobacter cloacae                       |
| MLG 1094 | 2  | 10027 | 5890  | 4335  | 43.23 | gii169147133 emb <br>CU459141.1 | 39362<br>91  | 2397  | 0.06 | 552 | k__Bacteria;p__Proteobacteria;c__Gammaproteobacteria;o__Pseudomonadales;f__Moraxellaceae;g__Acinetobacter;s__Acinetobacter baumannii                          |
| MLG 1095 | 2  | 10022 | 5502  | 0     | 0     | 0                               | -            | 0     | 0    | 0   | Unknow                                                                                                                                                        |
| MLG 1096 | 8  | 10016 | 2721  | 0     | 0     | 0                               | -            | 0     | 0    | 0   | Unknow                                                                                                                                                        |
| UC-34432 | 1  | 16247 | 16247 | 16247 | 100   | gii115511419 gb C<br>P000468.1  | 50820<br>25  | 16256 | 0.32 | 1   | k__Bacteria;p__Proteobacteria;c__Gammaproteobacteria;o__Enterobacteriales;f__Enterobacteriaceae;g__Escherichia;s__Escherichia coli                            |
| UC-35103 | 1  | 11517 | 11517 | 5571  | 48.37 | gii664682453 gb C<br>P008801.1  | 47185<br>45  | 5571  | 0.12 | 1   | k__Bacteria;p__Proteobacteria;c__Gammaproteobacteria;o__Enterobacteriales;f__Enterobacteriaceae;g__Escherichia;s__Escherichia coli                            |
| UC-36980 | 1  | 23235 | 23235 | 12736 | 54.81 | gii672600155 gb C<br>P009114.1  | 52975<br>11  | 13023 | 0.25 | 7   | k__Bacteria;p__Proteobacteria;c__Gammaproteobacteria;o__Enterobacteriales;f__Enterobacteriaceae;g__Klebsiella;s__Klebsiella pneumoniae                        |
| UC-36984 | 1  | 35378 | 35378 | 0     | 0     | 0                               | -            | 0     | 0    | 0   | Unknow                                                                                                                                                        |
| UC-37049 | 1  | 11165 | 11165 | 9107  | 81.57 | gii573019581 gb C<br>P006569.1  | 47095<br>28  | 9104  | 0.19 | 302 | k__Bacteria;p__Proteobacteria;c__Gammaproteobacteria;o__Enterobacteriales;f__Enterobacteriaceae;g__Sodalis;s__Sodalis sp. H51                                 |
| UC-39752 | 1  | 11882 | 11882 | 6493  | 54.65 | gii400173048 gb C<br>P003737.1  | 47265<br>82  | 6540  | 0.14 | 4   | k__Bacteria;p__Proteobacteria;c__Gammaproteobacteria;o__Enterobacteriales;f__Enterobacteriaceae;g__Enterobacter;s__Enterobacter cloacae                       |
| UC-39843 | 1  | 28926 | 28926 | 0     | 0     | 0                               | -            | 0     | 0    | 0   | Unknow                                                                                                                                                        |
| UC-47653 | 1  | 24907 | 24907 | 24709 | 99.21 | gii573932891 gb C<br>P006262.1  | 54022<br>76  | 24709 | 0.46 | 1   | k__Bacteria;p__Proteobacteria;c__Gammaproteobacteria;o__Enterobacteriales;f__Enterobacteriaceae;g__Escherichia;s__Escherichia coli                            |

|          |   |        |        |       |       |                              |         |       |      |     |                                                                                                                                         |
|----------|---|--------|--------|-------|-------|------------------------------|---------|-------|------|-----|-----------------------------------------------------------------------------------------------------------------------------------------|
| UC-48875 | 1 | 10189  | 10189  | 7061  | 69.3  | gii605537200 gb C P007533.1  | 4603849 | 7062  | 0.15 | 5   | k__Bacteria;p__Proteobacteria;c__Gammaproteobacteria;o__Enterobacteriales;f__Enterobacteriaceae;g__Salmonella;s__Salmonella enterica    |
| UC-56717 | 1 | 11299  | 11299  | 6656  | 58.91 | gii564743501 gb C P005995.1  | 4783867 | 6655  | 0.14 | 5   | k__Bacteria;p__Proteobacteria;c__Gammaproteobacteria;o__Enterobacteriales;f__Enterobacteriaceae;g__Salmonella;s__Salmonella enterica    |
| UC-56733 | 1 | 18303  | 18303  | 6809  | 37.2  | gii113886955 gb C P000444.1  | 4792610 | 6821  | 0.14 | 524 | k__Bacteria;p__Proteobacteria;c__Gammaproteobacteria;o__Alteromonadales;f__Shewanellaceae;g__Shewanella;s__Shewanella sp. MR-7          |
| UC-56734 | 1 | 18689  | 18689  | 16384 | 87.67 | gii400173048 gb C P003737.1  | 4726582 | 16377 | 0.35 | 4   | k__Bacteria;p__Proteobacteria;c__Gammaproteobacteria;o__Enterobacteriales;f__Enterobacteriaceae;g__Enterobacter;s__Enterobacter cloacae |
| UC-56761 | 1 | 16221  | 16221  | 16221 | 100   | gii170517292 gb C P000970.1  | 5068389 | 16221 | 0.32 | 1   | k__Bacteria;p__Proteobacteria;c__Gammaproteobacteria;o__Enterobacteriales;f__Enterobacteriaceae;g__Escherichia;s__Escherichia coli      |
| UC-56885 | 1 | 10902  | 10902  | 10902 | 100   | gii312910970 dbj  AP011957.1 | 4954814 | 11494 | 0.23 | 5   | k__Bacteria;p__Proteobacteria;c__Gammaproteobacteria;o__Enterobacteriales;f__Enterobacteriaceae;g__Salmonella;s__Salmonella enterica    |
| UC-56886 | 1 | 15498  | 15498  | 15498 | 100   | gii312910970 dbj  AP011957.1 | 4954814 | 16290 | 0.33 | 5   | k__Bacteria;p__Proteobacteria;c__Gammaproteobacteria;o__Enterobacteriales;f__Enterobacteriaceae;g__Salmonella;s__Salmonella enterica    |
| UC-57257 | 1 | 31572  | 31572  | 29966 | 94.91 | gii222031834 emb  C0651637.1 | 4773108 | 29968 | 0.63 | 1   | k__Bacteria;p__Proteobacteria;c__Gammaproteobacteria;o__Enterobacteriales;f__Enterobacteriaceae;g__Escherichia;s__Escherichia coli      |
| UC-57296 | 1 | 22174  | 22174  | 14586 | 65.78 | gii640850664 gb C P007731.1  | 5241638 | 15349 | 0.29 | 7   | k__Bacteria;p__Proteobacteria;c__Gammaproteobacteria;o__Enterobacteriales;f__Enterobacteriaceae;g__Klebsiella;s__Klebsiella pneumoniae  |
| UC-58618 | 1 | 27056  | 27056  | 23986 | 88.65 | gii218350208 emb  CU928145.2 | 5154862 | 29484 | 0.57 | 1   | k__Bacteria;p__Proteobacteria;c__Gammaproteobacteria;o__Enterobacteriales;f__Enterobacteriaceae;g__Escherichia;s__Escherichia coli      |
| UC-59666 | 1 | 225695 | 225695 | 0     | 0     | 0                            | -       | 0     | 0    | 0   | Unknow                                                                                                                                  |
| UC-62958 | 1 | 16095  | 16095  | 10669 | 66.29 | gii449096568 gb C P004091.1  | 4344092 | 10668 | 0.25 | 271 | k__Bacteria;p__Proteobacteria;c__Gammaproteobacteria;o__Enterobacteriales;f__Enterobacteriaceae;g__Cronobacter;s__Cronobacter sakazakii |
| UC-63712 | 1 | 47374  | 47374  | 0     | 0     | 0                            | -       | 0     | 0    | 0   | Unknow                                                                                                                                  |
| UC-63857 | 1 | 10355  | 10355  | 10355 | 100   | gii169887498 gb C P000948.1  | 4686137 | 11415 | 0.24 | 1   | k__Bacteria;p__Proteobacteria;c__Gammaproteobacteria;o__Enterobacteriales;f__Enterobacteriaceae;g__Escherichia;s__Escherichia coli      |
| UC-65875 | 1 | 15853  | 15853  | 15853 | 100   | gii169752989 gb C P000946.1  | 4746218 | 15853 | 0.33 | 1   | k__Bacteria;p__Proteobacteria;c__Gammaproteobacteria;o__Enterobacteriales;f__Enterobacteriaceae;g__Escherichia;s__Escherichia coli      |
| UC-65877 | 1 | 16304  | 16304  | 8598  | 52.74 | gii549815675 gb C P006648.1  | 5166857 | 8593  | 0.17 | 7   | k__Bacteria;p__Proteobacteria;c__Gammaproteobacteria;o__Enterobacteriales;f__Enterobacteriaceae;g__Klebsiella;s__Klebsiella pneumoniae  |
| C33      | 1 | 26642  | 26642  | 25106 | 94.23 | gii317160986 gb C P002439.1  | 2617381 | 50872 | 1.94 | 154 | k__Bacteria;p__Firmicutes;c__Bacilli;o__Bacillales;f__Staphylococcaceae;g__Staphylococcus;s__Staphylococcus pseudintermedius            |
| C43      | 1 | 10883  | 10883  | 10406 | 95.62 | gii110341805 gb C P000247.1  | 4938920 | 10406 | 0.21 | 1   | k__Bacteria;p__Proteobacteria;c__Gammaproteobacteria;o__Enterobacteriales;f__Enterobacteriaceae;g__Escherichia;s__Escherichia coli      |
| C69      | 1 | 46459  | 46459  | 36050 | 77.6  | gii595607150 gb C P007394.1  | 5090442 | 36053 | 0.71 | 1   | k__Bacteria;p__Proteobacteria;c__Gammaproteobacteria;o__Enterobacteriales;f__Enterobacteriaceae;g__Escherichia;s__Escherichia coli      |
| C99      | 1 | 11726  | 11726  | 3851  | 32.84 | gii619734722 gb C P007557.1  | 5099034 | 5228  | 0.1  | 267 | k__Bacteria;p__Proteobacteria;c__Gammaproteobacteria;o__Enterobacteriales;f__Enterobacteriaceae;g__Citrobacter;s__Citrobacter freundii  |
| C189     | 1 | 24482  | 24482  | 8041  | 32.84 | gii110341805 gb C P000247.1  | 4938920 | 9056  | 0.18 | 1   | k__Bacteria;p__Proteobacteria;c__Gammaproteobacteria;o__Enterobacteriales;f__Enterobacteriaceae;g__Escherichia;s__Escherichia coli      |
| C290     | 1 | 16247  | 16247  | 0     | 0     | 0                            | -       | 0     | 0    | 0   | Unknow                                                                                                                                  |
| C520     | 1 | 13010  | 13010  | 9788  | 75.23 | gii374681091 gb C P003295.1  | 1988420 | 9774  | 0.49 | 228 | k__Bacteria;p__Firmicutes;c__Bacilli;o__Lactobacillales;f__Streptococcaceae;g__Streptococcus;s__Streptococcus infantarius               |
| C538     | 1 | 65424  | 65424  | 57464 | 87.83 | gii597512677 emb  FO834906.1 | 5438894 | 58310 | 1.07 | 7   | k__Bacteria;p__Proteobacteria;c__Gammaproteobacteria;o__Enterobacteriales;f__Enterobacteriaceae;g__Klebsiella;s__Klebsiella pneumoniae  |
| C752     | 1 | 12708  | 12708  | 9359  | 73.65 | gii294489418 gb C P001969.1  | 5108383 | 9360  | 0.18 | 1   | k__Bacteria;p__Proteobacteria;c__Gammaproteobacteria;o__Enterobacteriales;f__Enterobacteriaceae;g__Escherichia;s__Escherichia coli      |
| C1096    | 1 | 15207  | 15207  | 14820 | 97.46 | gii110341805 gb C P000247.1  | 4938920 | 15137 | 0.31 | 1   | k__Bacteria;p__Proteobacteria;c__Gammaproteobacteria;o__Enterobacteriales;f__Enterobacteriaceae;g__Escherichia;s__Escherichia coli      |
| C1203    | 1 | 12501  | 12501  | 0     | 0     | 0                            | -       | 0     | 0    | 0   | Unknow                                                                                                                                  |
| C1227    | 1 | 23833  | 23833  | 16626 | 69.76 | gii674299053 gb C P009072.1  | 5130767 | 23821 | 0.46 | 1   | k__Bacteria;p__Proteobacteria;c__Gammaproteobacteria;o__Enterobacteriales;f__Enterobacteriaceae;g__Escherichia;s__Escherichia coli      |

|       |   |       |       |       |       |                             |         |       |      |     |                                                                                                                                        |
|-------|---|-------|-------|-------|-------|-----------------------------|---------|-------|------|-----|----------------------------------------------------------------------------------------------------------------------------------------|
| C1231 | 1 | 34428 | 34428 | 28134 | 81.72 | gii597512677 emb FO834906.1 | 5438894 | 28135 | 0.52 | 7   | k__Bacteria;p__Proteobacteria;c__Gammaproteobacteria;o__Enterobacteriales;f__Enterobacteriaceae;g__Klebsiella pneumoniae               |
| C1303 | 1 | 15533 | 15533 | 15533 | 100   | gii218359353 emb CU928160.2 | 4700560 | 15533 | 0.33 | 1   | k__Bacteria;p__Proteobacteria;c__Gammaproteobacteria;o__Enterobacteriales;f__Enterobacteriaceae;g__Escherichia;s__Escherichia coli     |
| C1305 | 1 | 11346 | 11346 | 8817  | 77.71 | gii253322479 gb C P001665.1 | 4570938 | 9115  | 0.2  | 1   | k__Bacteria;p__Proteobacteria;c__Gammaproteobacteria;o__Enterobacteriales;f__Enterobacteriaceae;g__Escherichia;s__Escherichia coli     |
| C1367 | 1 | 26574 | 26574 | 23891 | 89.9  | gii257757386 dbj AP010958.1 | 5449314 | 23892 | 0.44 | 1   | k__Bacteria;p__Proteobacteria;c__Gammaproteobacteria;o__Enterobacteriales;f__Enterobacteriaceae;g__Escherichia;s__Escherichia coli     |
| C1689 | 1 | 10889 | 10889 | 3483  | 31.99 | gii595583568 gb C P007265.1 | 4758629 | 3476  | 0.07 | 1   | k__Bacteria;p__Proteobacteria;c__Gammaproteobacteria;o__Enterobacteriales;f__Enterobacteriaceae;g__Escherichia;s__Escherichia coli     |
| C1718 | 1 | 11476 | 11476 | 6982  | 60.84 | gii30407157 emb A L513382.1 | 4809037 | 7005  | 0.15 | 5   | k__Bacteria;p__Proteobacteria;c__Gammaproteobacteria;o__Enterobacteriales;f__Enterobacteriaceae;g__Salmonella;s__Salmonella enterica   |
| C1803 | 1 | 12338 | 12338 | 8744  | 70.87 | gii384478111 gb C P003488.1 | 4402109 | 8742  | 0.2  | 327 | k__Bacteria;p__Proteobacteria;c__Gammaproteobacteria;o__Enterobacteriales;f__Enterobacteriaceae;g__Providencia;s__Providencia stuartii |
| C1807 | 1 | 15745 | 15745 | 15745 | 100   | gii110341805 gb C P000247.1 | 4938920 | 15735 | 0.32 | 1   | k__Bacteria;p__Proteobacteria;c__Gammaproteobacteria;o__Enterobacteriales;f__Enterobacteriaceae;g__Escherichia;s__Escherichia coli     |
| C1831 | 1 | 32680 | 32680 | 23767 | 72.73 | gii110341805 gb C P000247.1 | 4938920 | 23749 | 0.48 | 1   | k__Bacteria;p__Proteobacteria;c__Gammaproteobacteria;o__Enterobacteriales;f__Enterobacteriaceae;g__Escherichia;s__Escherichia coli     |
| C1849 | 1 | 17022 | 17022 | 17022 | 100   | gii257757386 dbj AP010958.1 | 5449314 | 92927 | 1.71 | 1   | k__Bacteria;p__Proteobacteria;c__Gammaproteobacteria;o__Enterobacteriales;f__Enterobacteriaceae;g__Escherichia;s__Escherichia coli     |
| C1872 | 1 | 11885 | 11885 | 6295  | 52.97 | gii601101465 gb C P007505.1 | 4864410 | 6289  | 0.13 | 5   | k__Bacteria;p__Proteobacteria;c__Gammaproteobacteria;o__Enterobacteriales;f__Enterobacteriaceae;g__Salmonella;s__Salmonella enterica   |
| C1876 | 1 | 11005 | 11005 | 11005 | 100   | gii660550561 gb C P008700.1 | 5365144 | 11318 | 0.21 | 7   | k__Bacteria;p__Proteobacteria;c__Gammaproteobacteria;o__Enterobacteriales;f__Enterobacteriaceae;g__Klebsiella pneumoniae               |
| C1899 | 1 | 10029 | 10029 | 7536  | 75.14 | gii672600155 gb C P009114.1 | 5297511 | 7614  | 0.14 | 7   | k__Bacteria;p__Proteobacteria;c__Gammaproteobacteria;o__Enterobacteriales;f__Enterobacteriaceae;g__Klebsiella pneumoniae               |
| C1943 | 1 | 11555 | 11555 | 6381  | 55.22 | gii257751862 dbj AP010953.1 | 5697240 | 6767  | 0.12 | 1   | k__Bacteria;p__Proteobacteria;c__Gammaproteobacteria;o__Enterobacteriales;f__Enterobacteriaceae;g__Escherichia;s__Escherichia coli     |
| C2354 | 1 | 28350 | 28350 | 28350 | 100   | gii257757386 dbj AP010958.1 | 5449314 | 28349 | 0.52 | 1   | k__Bacteria;p__Proteobacteria;c__Gammaproteobacteria;o__Enterobacteriales;f__Enterobacteriaceae;g__Escherichia;s__Escherichia coli     |
| C2389 | 1 | 10373 | 10373 | 10319 | 99.48 | gii257751862 dbj AP010953.1 | 5697240 | 57732 | 1.01 | 1   | k__Bacteria;p__Proteobacteria;c__Gammaproteobacteria;o__Enterobacteriales;f__Enterobacteriaceae;g__Escherichia;s__Escherichia coli     |
| C2402 | 1 | 21041 | 21041 | 0     | 0     | 0                           | -       | 0     | 0    | 0   | Unknow                                                                                                                                 |
| C2541 | 1 | 13568 | 13568 | 13568 | 100   | gii157065147 gb C P000802.1 | 4643538 | 13568 | 0.29 | 1   | k__Bacteria;p__Proteobacteria;c__Gammaproteobacteria;o__Enterobacteriales;f__Enterobacteriaceae;g__Escherichia;s__Escherichia coli     |
| C2591 | 1 | 16136 | 16136 | 0     | 0     | 0                           | -       | 0     | 0    | 0   | Unknow                                                                                                                                 |
| C2628 | 1 | 13693 | 13693 | 0     | 0     | 0                           | -       | 0     | 0    | 0   | Unknow                                                                                                                                 |
| C2731 | 1 | 11936 | 11936 | 4547  | 38.09 | gii619734722 gb C P007557.1 | 5099034 | 4618  | 0.09 | 267 | k__Bacteria;p__Proteobacteria;c__Gammaproteobacteria;o__Enterobacteriales;f__Enterobacteriaceae;g__Citrobacter;s__Citrobacter freundii |
| C2986 | 1 | 18642 | 18642 | 17247 | 92.52 | gii115511419 gb C P000468.1 | 5082025 | 20536 | 0.4  | 1   | k__Bacteria;p__Proteobacteria;c__Gammaproteobacteria;o__Enterobacteriales;f__Enterobacteriaceae;g__Escherichia;s__Escherichia coli     |
| C3173 | 1 | 14011 | 14011 | 0     | 0     | 0                           | -       | 0     | 0    | 0   | Unknow                                                                                                                                 |
| C3334 | 1 | 21333 | 21333 | 10797 | 50.61 | gii597512677 emb FO834906.1 | 5438894 | 10938 | 0.2  | 7   | k__Bacteria;p__Proteobacteria;c__Gammaproteobacteria;o__Enterobacteriales;f__Enterobacteriaceae;g__Klebsiella pneumoniae               |
| C3483 | 1 | 47206 | 47206 | 14265 | 30.22 | gii595583568 gb C P007265.1 | 4758629 | 17161 | 0.36 | 1   | k__Bacteria;p__Proteobacteria;c__Gammaproteobacteria;o__Enterobacteriales;f__Enterobacteriaceae;g__Escherichia;s__Escherichia coli     |
| C3497 | 1 | 13530 | 13530 | 0     | 0     | 0                           | -       | 0     | 0    | 0   | Unknow                                                                                                                                 |
| C3560 | 1 | 38530 | 38530 | 22312 | 57.91 | gii336447599 gb C P002844.1 | 2264399 | 23386 | 1.03 | 367 | k__Bacteria;p__Firmicutes;c__Bacilli;o__Lactobacillales;f__Lactobacillaceae;g__Lactobacillus;s__Lactobacillus reuteri                  |
| C3729 | 1 | 23173 | 23173 | 16914 | 72.99 | gii530342600 gb C P006656.1 | 5273813 | 31471 | 0.6  | 7   | k__Bacteria;p__Proteobacteria;c__Gammaproteobacteria;o__Enterobacteriales;f__Enterobacteriaceae;g__Klebsiella pneumoniae               |

|          |   |       |       |       |       |                             |         |       |      |     |                                                                                                                                              |
|----------|---|-------|-------|-------|-------|-----------------------------|---------|-------|------|-----|----------------------------------------------------------------------------------------------------------------------------------------------|
| C3783    | 1 | 10204 | 10204 | 9950  | 97.51 | gii26111730 gb AE014075.1   | 5231428 | 9954  | 0.19 | 1   | k__Bacteria;p__Proteobacteria;c__Gammaproteobacteria;o__Enterobacteriales;f__Enterobacteriaceae;g__Escherichia;s__Escherichia coli           |
| C4076    | 1 | 10567 | 10567 | 9610  | 90.94 | gii257751862 dbj AP010953.1 | 5697240 | 10197 | 0.18 | 1   | k__Bacteria;p__Proteobacteria;c__Gammaproteobacteria;o__Enterobacteriales;f__Enterobacteriaceae;g__Escherichia;s__Escherichia coli           |
| C4078    | 1 | 21724 | 21724 | 21724 | 100   | gii150953431 gb C000647.1   | 5315120 | 22088 | 0.42 | 7   | k__Bacteria;p__Proteobacteria;c__Gammaproteobacteria;o__Enterobacteriales;f__Enterobacteriaceae;g__Klebsiella;s__Klebsiella pneumoniae       |
| C4287    | 1 | 46187 | 46187 | 0     | 0     | 0                           | -       | 0     | 0    | 0   | Unknow                                                                                                                                       |
| C4328    | 1 | 10455 | 10455 | 10144 | 97.03 | gii480474683 gb C004142.1   | 5398151 | 10133 | 0.19 | 14  | k__Bacteria;p__Proteobacteria;c__Gammaproteobacteria;o__Enterobacteriales;f__Enterobacteriaceae;g__Raoultella;a;s__Raoultella omithinolytica |
| C4331    | 1 | 11770 | 11770 | 6611  | 56.17 | gii339759707 gb C002910.1   | 5259571 | 6606  | 0.13 | 7   | k__Bacteria;p__Proteobacteria;c__Gammaproteobacteria;o__Enterobacteriales;f__Enterobacteriaceae;g__Klebsiella;a;s__Klebsiella pneumoniae     |
| C4612    | 1 | 18305 | 18305 | 9807  | 53.58 | gii511525997 gb C005991.1   | 5039027 | 10414 | 0.21 | 268 | k__Bacteria;p__Proteobacteria;c__Gammaproteobacteria;o__Enterobacteriales;f__Enterobacteriaceae;g__Enterobacter;s__Enterobacter sp. R4-368   |
| C4638    | 1 | 14789 | 14789 | 14789 | 100   | gii383101383 gb C002291.1   | 4935294 | 15406 | 0.31 | 1   | k__Bacteria;p__Proteobacteria;c__Gammaproteobacteria;o__Enterobacteriales;f__Enterobacteriaceae;g__Escherichia;s__Escherichia coli           |
| C5321    | 1 | 10541 | 10541 | 5202  | 49.35 | gii662712225 gb C008823.1   | 4852980 | 5213  | 0.11 | 4   | k__Bacteria;p__Proteobacteria;c__Gammaproteobacteria;o__Enterobacteriales;f__Enterobacteriaceae;g__Enterobacter;s__Enterobacter cloacae      |
| C5427    | 1 | 33144 | 33144 | 24467 | 73.82 | gii308746527 gb C002272.1   | 4814049 | 24791 | 0.51 | 8   | k__Bacteria;p__Proteobacteria;c__Gammaproteobacteria;o__Enterobacteriales;f__Enterobacteriaceae;g__Enterobacter;s__Enterobacter lignolyticus |
| C5468    | 1 | 10397 | 10397 | 10397 | 100   | gii288887617 gb C001891.1   | 5458505 | 11071 | 0.2  | 10  | k__Bacteria;p__Proteobacteria;c__Gammaproteobacteria;o__Enterobacteriales;f__Enterobacteriaceae;g__Klebsiella;a;s__Klebsiella variicola      |
| UC-77341 | 1 | 12323 | 12323 | 3737  | 30.33 | gii595597955 gb C007392.1   | 5054509 | 3940  | 0.08 | 1   | k__Bacteria;p__Proteobacteria;c__Gammaproteobacteria;o__Enterobacteriales;f__Enterobacteriaceae;g__Escherichia;s__Escherichia coli           |
| UC-77728 | 1 | 10402 | 10402 | 8487  | 81.59 | gii290760697 gb C001846.1   | 5386352 | 8487  | 0.16 | 1   | k__Bacteria;p__Proteobacteria;c__Gammaproteobacteria;o__Enterobacteriales;f__Enterobacteriaceae;g__Escherichia;s__Escherichia coli           |
| UC-79091 | 1 | 39285 | 39285 | 0     | 0     | 0                           | -       | 0     | 0    | 0   | Unknow                                                                                                                                       |
| UC-79120 | 1 | 10285 | 10285 | 7788  | 75.72 | gii309700213 emb FN649414.1 | 5153435 | 7786  | 0.15 | 1   | k__Bacteria;p__Proteobacteria;c__Gammaproteobacteria;o__Enterobacteriales;f__Enterobacteriaceae;g__Escherichia;s__Escherichia coli           |
| UC-79233 | 1 | 11344 | 11344 | 5113  | 45.07 | gii675819096 emb LM995659.1 | 1236124 | 8408  | 0.68 | 1   | k__Bacteria;p__Proteobacteria;c__Gammaproteobacteria;o__Enterobacteriales;f__Enterobacteriaceae;g__Escherichia;s__Escherichia coli           |
| UC-79296 | 1 | 20745 | 20745 | 20150 | 97.13 | gii315059226 gb C002185.1   | 4900968 | 20446 | 0.42 | 1   | k__Bacteria;p__Proteobacteria;c__Gammaproteobacteria;o__Enterobacteriales;f__Enterobacteriaceae;g__Escherichia;s__Escherichia coli           |
| UC-79329 | 1 | 15205 | 15205 | 5746  | 37.79 | gii339511397 emb FR877557.1 | 4460105 | 6102  | 0.14 | 13  | k__Bacteria;p__Proteobacteria;c__Gammaproteobacteria;o__Enterobacteriales;f__Enterobacteriaceae;g__Salmonella;s__Salmonella bongori          |
| UC-79391 | 1 | 12570 | 12570 | 10830 | 86.16 | gii170517292 gb C000970.1   | 5068389 | 10833 | 0.21 | 1   | k__Bacteria;p__Proteobacteria;c__Gammaproteobacteria;o__Enterobacteriales;f__Enterobacteriaceae;g__Escherichia;s__Escherichia coli           |
| UC-79651 | 1 | 18910 | 18910 | 10327 | 54.61 | gii329666391 gb C002464.1   | 1966342 | 10273 | 0.52 | 193 | k__Bacteria;p__Firmicutes;c__Bacilli;o__Lactobacillales;f__Lactobacillaceae;g__Lactobacillus;s__Lactobacillus johnsonii                      |
| UC-82762 | 1 | 10230 | 10230 | 7735  | 75.61 | gii281177210 dbj AP009378.1 | 4717338 | 7734  | 0.16 | 1   | k__Bacteria;p__Proteobacteria;c__Gammaproteobacteria;o__Enterobacteriales;f__Enterobacteriaceae;g__Escherichia;s__Escherichia coli           |
| UC-83160 | 1 | 10024 | 10024 | 7888  | 78.69 | gii218430358 emb CU928163.2 | 5202090 | 7885  | 0.15 | 1   | k__Bacteria;p__Proteobacteria;c__Gammaproteobacteria;o__Enterobacteriales;f__Enterobacteriaceae;g__Escherichia;s__Escherichia coli           |
| UC-83207 | 1 | 10719 | 10719 | 7831  | 73.06 | gii619734722 gb C007557.1   | 5099034 | 7831  | 0.15 | 267 | k__Bacteria;p__Proteobacteria;c__Gammaproteobacteria;o__Enterobacteriales;f__Enterobacteriaceae;g__Citrobacter;s__Citrobacter freundii       |
| UC-83982 | 1 | 23692 | 23692 | 0     | 0     | 0                           | -       | 0     | 0    | 0   | Unknow                                                                                                                                       |
| UC-90958 | 1 | 38677 | 38677 | 0     | 0     | 0                           | -       | 0     | 0    | 0   | Unknow                                                                                                                                       |
| UC-93396 | 1 | 47805 | 47805 | 39463 | 82.55 | gii332341332 gb C002729.1   | 5186416 | 40837 | 0.79 | 1   | k__Bacteria;p__Proteobacteria;c__Gammaproteobacteria;o__Enterobacteriales;f__Enterobacteriaceae;g__Escherichia;s__Escherichia coli           |
| UC-93470 | 1 | 41575 | 41575 | 41575 | 100   | gii222031834 emb CU651637.1 | 4773108 | 43986 | 0.92 | 1   | k__Bacteria;p__Proteobacteria;c__Gammaproteobacteria;o__Enterobacteriales;f__Enterobacteriaceae;g__Escherichia;s__Escherichia coli           |
| UC-      | 1 | 24659 | 24659 | 14958 | 60.66 | gii640850664 gb C           | 52416   | 15318 | 0.29 | 7   | k__Bacteria;p__Proteobacteria;c__Gammaproteobacteria;o__Enterobacteriales;f__Enterobacteriaceae;g__Klebsiella                                |

|           |   |       |       |       |       |                              |         |       |      |     |                                                                                                                                                               |
|-----------|---|-------|-------|-------|-------|------------------------------|---------|-------|------|-----|---------------------------------------------------------------------------------------------------------------------------------------------------------------|
| 93731     |   |       |       |       |       | P007731.1]                   | 38      |       |      |     | a;s_Klebsiella pneumoniae                                                                                                                                     |
| UC-93755  | 1 | 28603 | 28603 | 18494 | 64.66 | gii523815970 gb C P006055.1] | 4977480 | 18484 | 0.37 | 5   | k__Bacteria;p__Proteobacteria;c__Gammaproteobacteria;o__Enterobacteriales;f__Enterobacteriaceae;g__Salmonella;s__Salmonella enterica                          |
| UC-94079  | 1 | 87855 | 87855 | 0     | 0     | 0                            | -       | 0     | 0    | 0   | Unknow                                                                                                                                                        |
| UC-108246 | 1 | 13020 | 13020 | 0     | 0     | 0                            | -       | 0     | 0    | 0   | Unknow                                                                                                                                                        |
| C6040     | 1 | 12829 | 12829 | 5314  | 41.42 | gii619734722 gb C P007557.1] | 5099034 | 7803  | 0.15 | 267 | k__Bacteria;p__Proteobacteria;c__Gammaproteobacteria;o__Enterobacteriales;f__Enterobacteriaceae;g__Citrobacter;s__Citrobacter freundii                        |
| C6065     | 1 | 12971 | 12971 | 11809 | 91.04 | gii301795385 emb FP929140.1] | 4587455 | 11806 | 0.26 | 516 | k__Bacteria;p__Proteobacteria;c__Gammaproteobacteria;o__Unclassified;f__Unclassified;g__Unclassified;s__gamma proteobacterium HdN1                            |
| C6285     | 1 | 10341 | 10341 | 9562  | 92.47 | gii110341805 gb C P000247.1] | 4938920 | 9560  | 0.19 | 1   | k__Bacteria;p__Proteobacteria;c__Gammaproteobacteria;o__Enterobacteriales;f__Enterobacteriaceae;g__Escherichia;s__Escherichia coli                            |
| C6511     | 1 | 12349 | 12349 | 8954  | 72.51 | gii440045023 gb C P003938.1] | 4762179 | 9041  | 0.19 | 3   | k__Bacteria;p__Proteobacteria;c__Gammaproteobacteria;o__Enterobacteriales;f__Enterobacteriaceae;g__Unclassified;s__Enterobacteriaceae bacterium strain FGI 57 |
| C681-4    | 1 | 12734 | 12734 | 12734 | 100   | gii218430358 emb CU928163.2] | 5202090 | 12734 | 0.24 | 1   | k__Bacteria;p__Proteobacteria;c__Gammaproteobacteria;o__Enterobacteriales;f__Enterobacteriaceae;g__Escherichia;s__Escherichia coli                            |
| C1540-7   | 1 | 17304 | 17304 | 9315  | 53.83 | gii695172424 gb C P008929.1] | 5317001 | 10558 | 0.2  | 7   | k__Bacteria;p__Proteobacteria;c__Gammaproteobacteria;o__Enterobacteriales;f__Enterobacteriaceae;g__Klebsiella;s__Klebsiella pneumoniae                        |
| C1269-3   | 1 | 15089 | 15089 | 15089 | 100   | gii26111730 gb AE 014075.1]  | 5231428 | 16514 | 0.32 | 1   | k__Bacteria;p__Proteobacteria;c__Gammaproteobacteria;o__Enterobacteriales;f__Enterobacteriaceae;g__Escherichia;s__Escherichia coli                            |
| C360-10   | 1 | 63521 | 63521 | 41448 | 65.25 | gii695172424 gb C P008929.1] | 5317001 | 41450 | 0.78 | 7   | k__Bacteria;p__Proteobacteria;c__Gammaproteobacteria;o__Enterobacteriales;f__Enterobacteriaceae;g__Klebsiella;s__Klebsiella pneumoniae                        |
| C181-7    | 1 | 43336 | 43336 | 21043 | 48.56 | gii660577155 gb C P008797.1] | 5396164 | 22490 | 0.42 | 7   | k__Bacteria;p__Proteobacteria;c__Gammaproteobacteria;o__Enterobacteriales;f__Enterobacteriaceae;g__Klebsiella;s__Klebsiella pneumoniae                        |
| C3038-1   | 1 | 17603 | 17603 | 10642 | 60.46 | gii307551844 gb C P001671.1] | 5131397 | 10837 | 0.21 | 1   | k__Bacteria;p__Proteobacteria;c__Gammaproteobacteria;o__Enterobacteriales;f__Enterobacteriaceae;g__Escherichia;s__Escherichia coli                            |
| C539-9    | 1 | 14189 | 14189 | 14189 | 100   | gii312910970 dbj AP011957.1] | 4954814 | 17377 | 0.35 | 5   | k__Bacteria;p__Proteobacteria;c__Gammaproteobacteria;o__Enterobacteriales;f__Enterobacteriaceae;g__Salmonella;s__Salmonella enterica                          |
| C537-2    | 1 | 19893 | 19893 | 19893 | 100   | gii170517292 gb C P000970.1] | 5068389 | 20218 | 0.4  | 1   | k__Bacteria;p__Proteobacteria;c__Gammaproteobacteria;o__Enterobacteriales;f__Enterobacteriaceae;g__Escherichia;s__Escherichia coli                            |
| C537-5    | 1 | 11304 | 11304 | 11304 | 100   | gii170517292 gb C P000970.1] | 5068389 | 11304 | 0.22 | 1   | k__Bacteria;p__Proteobacteria;c__Gammaproteobacteria;o__Enterobacteriales;f__Enterobacteriaceae;g__Escherichia;s__Escherichia coli                            |
| C400-3    | 1 | 12292 | 12292 | 12292 | 100   | gii569550235 gb C P003999.1] | 5307003 | 12292 | 0.23 | 7   | k__Bacteria;p__Proteobacteria;c__Gammaproteobacteria;o__Enterobacteriales;f__Enterobacteriaceae;g__Klebsiella;s__Klebsiella pneumoniae                        |
| C3470-2   | 1 | 23673 | 23673 | 23673 | 100   | gii157065147 gb C P000802.1] | 4643538 | 27149 | 0.58 | 1   | k__Bacteria;p__Proteobacteria;c__Gammaproteobacteria;o__Enterobacteriales;f__Enterobacteriaceae;g__Escherichia;s__Escherichia coli                            |
| C1737-1   | 1 | 16082 | 16082 | 12162 | 75.62 | gii218354981 emb CU928158.2] | 4588711 | 12163 | 0.27 | 2   | k__Bacteria;p__Proteobacteria;c__Gammaproteobacteria;o__Enterobacteriales;f__Enterobacteriaceae;g__Escherichia;s__Escherichia fergusonii                      |
| C539-10   | 1 | 13485 | 13485 | 5720  | 42.42 | gii312910970 dbj AP011957.1] | 4954814 | 7873  | 0.16 | 5   | k__Bacteria;p__Proteobacteria;c__Gammaproteobacteria;o__Enterobacteriales;f__Enterobacteriaceae;g__Salmonella;s__Salmonella enterica                          |
| C999-3    | 1 | 22349 | 22349 | 22349 | 100   | gii218363708 emb CU928161.2] | 5032268 | 24691 | 0.49 | 1   | k__Bacteria;p__Proteobacteria;c__Gammaproteobacteria;o__Enterobacteriales;f__Enterobacteriaceae;g__Escherichia;s__Escherichia coli                            |
| C558-1    | 1 | 14724 | 14724 | 4802  | 32.61 | gii549815675 gb C P006648.1] | 5166857 | 5038  | 0.1  | 7   | k__Bacteria;p__Proteobacteria;c__Gammaproteobacteria;o__Enterobacteriales;f__Enterobacteriaceae;g__Klebsiella;s__Klebsiella pneumoniae                        |
| C3470-3   | 1 | 21895 | 21895 | 8083  | 36.92 | gii660567586 gb C P008788.1] | 6152190 | 8092  | 0.13 | 12  | k__Bacteria;p__Proteobacteria;c__Gammaproteobacteria;o__Enterobacteriales;f__Enterobacteriaceae;g__Klebsiella;s__Klebsiella oxytoca                           |
| C539-8    | 1 | 14299 | 14299 | 7788  | 54.47 | gii326698716 gb C P001875.2] | 4703373 | 7984  | 0.17 | 305 | k__Bacteria;p__Proteobacteria;c__Gammaproteobacteria;o__Enterobacteriales;f__Enterobacteriaceae;g__Pantoea;s__Pantoea ananatis                                |
| C746-1    | 1 | 16021 | 16021 | 15591 | 97.32 | gii288730948 emb FN597254.1] | 2350911 | 15656 | 0.67 | 373 | k__Bacteria;p__Firmicutes;c__Bacilli;o__Lactobacillales;f__Streptococcaceae;g__Streptococcus;s__Streptococcus gallolyticus                                    |
| C2355-3   | 1 | 11130 | 11130 | 8791  | 78.98 | gii440045023 gb C P003938.1] | 4762179 | 8803  | 0.18 | 3   | k__Bacteria;p__Proteobacteria;c__Gammaproteobacteria;o__Enterobacteriales;f__Enterobacteriaceae;g__Unclassified;s__Enterobacteriaceae bacterium strain FGI 57 |

|           |   |       |       |       |       |                                 |             |       |      |     |                                                                                                                                         |
|-----------|---|-------|-------|-------|-------|---------------------------------|-------------|-------|------|-----|-----------------------------------------------------------------------------------------------------------------------------------------|
| C666-4    | 1 | 24857 | 24857 | 12409 | 49.92 | gii402539130 gb C<br>P003785.1  | 53867<br>05 | 12409 | 0.23 | 7   | k__Bacteria;p__Proteobacteria;c__Gammaproteobacteria;o__Enterobacteriales;f__Enterobacteriaceae;g__Klebsiella pneumoniae                |
| C666-3    | 1 | 25951 | 25951 | 20579 | 79.3  | gii597512677 emb <br>FO834906.1 | 54388<br>94 | 20585 | 0.38 | 7   | k__Bacteria;p__Proteobacteria;c__Gammaproteobacteria;o__Enterobacteriales;f__Enterobacteriaceae;g__Klebsiella pneumoniae                |
| C1677-3   | 1 | 16062 | 16062 | 0     | 0     | 0                               | -           | 0     | 0    | 0   | Unknow                                                                                                                                  |
| C1304-4   | 1 | 13952 | 13952 | 7742  | 55.49 | gii295054830 gb C<br>P001918.1  | 53145<br>81 | 9521  | 0.18 | 4   | k__Bacteria;p__Proteobacteria;c__Gammaproteobacteria;o__Enterobacteriales;f__Enterobacteriaceae;g__Enterobacter;s__Enterobacter cloacae |
| C924-3    | 1 | 13125 | 13125 | 0     | 0     | 0                               | -           | 0     | 0    | 0   | Unknow                                                                                                                                  |
| C1078-4   | 1 | 10867 | 10867 | 9173  | 84.41 | gii257751862 dbj <br>AP010953.1 | 56972<br>40 | 9109  | 0.16 | 1   | k__Bacteria;p__Proteobacteria;c__Gammaproteobacteria;o__Enterobacteriales;f__Enterobacteriaceae;g__Escherichia;s__Escherichia coli      |
| C534-3    | 1 | 33347 | 33347 | 23436 | 70.28 | gii605520020 gb C<br>P007531.1  | 47061<br>01 | 23430 | 0.5  | 5   | k__Bacteria;p__Proteobacteria;c__Gammaproteobacteria;o__Enterobacteriales;f__Enterobacteriaceae;g__Salmonella;s__Salmonella enterica    |
| C1415-6   | 1 | 16572 | 16572 | 11637 | 70.22 | gii595620023 gb C<br>P006918.1  | 52933<br>01 | 17081 | 0.32 | 7   | k__Bacteria;p__Proteobacteria;c__Gammaproteobacteria;o__Enterobacteriales;f__Enterobacteriaceae;g__Klebsiella pneumoniae                |
| C1719-2   | 1 | 21755 | 21755 | 19729 | 90.69 | gii349736152 gb C<br>P003034.1  | 53135<br>31 | 19809 | 0.37 | 1   | k__Bacteria;p__Proteobacteria;c__Gammaproteobacteria;o__Enterobacteriales;f__Enterobacteriaceae;g__Escherichia;s__Escherichia coli      |
| C1054-1   | 1 | 19622 | 19622 | 19622 | 100   | gii222031834 emb <br>CU651637.1 | 47731<br>08 | 23650 | 0.5  | 1   | k__Bacteria;p__Proteobacteria;c__Gammaproteobacteria;o__Enterobacteriales;f__Enterobacteriaceae;g__Escherichia;s__Escherichia coli      |
| C960-6    | 1 | 14183 | 14183 | 14183 | 100   | gii170517292 gb C<br>P000970.1  | 50683<br>89 | 16295 | 0.32 | 1   | k__Bacteria;p__Proteobacteria;c__Gammaproteobacteria;o__Enterobacteriales;f__Enterobacteriaceae;g__Escherichia;s__Escherichia coli      |
| C2488-3   | 1 | 13501 | 13501 | 10198 | 75.54 | gii326698716 gb C<br>P001875.2  | 47033<br>73 | 10199 | 0.22 | 305 | k__Bacteria;p__Proteobacteria;c__Gammaproteobacteria;o__Enterobacteriales;f__Enterobacteriaceae;g__Pantoea;s__Pantoea ananatis          |
| C496-1    | 1 | 38873 | 38873 | 0     | 0     | 0                               | -           | 0     | 0    | 0   | Unknow                                                                                                                                  |
| C3760-3   | 1 | 13352 | 13352 | 0     | 0     | 0                               | -           | 0     | 0    | 0   | Unknow                                                                                                                                  |
| C1415-8   | 1 | 23691 | 23691 | 10662 | 45    | gii150953431 gb C<br>P000647.1  | 53151<br>20 | 10638 | 0.2  | 7   | k__Bacteria;p__Proteobacteria;c__Gammaproteobacteria;o__Enterobacteriales;f__Enterobacteriaceae;g__Klebsiella pneumoniae                |
| C1056-4   | 1 | 10349 | 10349 | 10349 | 100   | gii157076741 gb C<br>P000800.1  | 49796<br>19 | 10349 | 0.21 | 1   | k__Bacteria;p__Proteobacteria;c__Gammaproteobacteria;o__Enterobacteriales;f__Enterobacteriaceae;g__Escherichia;s__Escherichia coli      |
| C2868-3   | 1 | 21162 | 21162 | 19891 | 93.99 | gii675819050 emb <br>LM995613.1 | 10000<br>52 | 19887 | 1.99 | 1   | k__Bacteria;p__Proteobacteria;c__Gammaproteobacteria;o__Enterobacteriales;f__Enterobacteriaceae;g__Escherichia;s__Escherichia coli      |
| C1269-4   | 1 | 10199 | 10199 | 9906  | 97.13 | gii307551844 gb C<br>P001671.1  | 51313<br>97 | 11980 | 0.23 | 1   | k__Bacteria;p__Proteobacteria;c__Gammaproteobacteria;o__Enterobacteriales;f__Enterobacteriaceae;g__Escherichia;s__Escherichia coli      |
| C1724-4   | 1 | 11483 | 11483 | 11183 | 97.39 | gii569535620 gb C<br>P007025.1  | 47018<br>75 | 11284 | 0.24 | 264 | k__Bacteria;p__Proteobacteria;c__Gammaproteobacteria;o__Enterobacteriales;f__Enterobacteriaceae;g__Escherichia;s__Escherichia albertii  |
| C583-6    | 1 | 10816 | 10816 | 10745 | 99.34 | gii569535620 gb C<br>P007025.1  | 47018<br>75 | 15726 | 0.33 | 264 | k__Bacteria;p__Proteobacteria;c__Gammaproteobacteria;o__Enterobacteriales;f__Enterobacteriaceae;g__Escherichia;s__Escherichia albertii  |
| C1153-3   | 1 | 21734 | 21734 | 20640 | 94.97 | gii218350208 emb <br>CU928145.2 | 51548<br>62 | 20665 | 0.4  | 1   | k__Bacteria;p__Proteobacteria;c__Gammaproteobacteria;o__Enterobacteriales;f__Enterobacteriaceae;g__Escherichia;s__Escherichia coli      |
| UC-138722 | 1 | 19928 | 19928 | 10198 | 51.17 | gii326698716 gb C<br>P001875.2  | 47033<br>73 | 10199 | 0.22 | 305 | k__Bacteria;p__Proteobacteria;c__Gammaproteobacteria;o__Enterobacteriales;f__Enterobacteriaceae;g__Pantoea;s__Pantoea ananatis          |
| UC-140840 | 1 | 12714 | 12714 | 0     | 0     | 0                               | -           | 0     | 0    | 0   | Unknow                                                                                                                                  |
| UC-150128 | 1 | 19039 | 19039 | 16433 | 86.31 | gii400173048 gb C<br>P003737.1  | 47265<br>82 | 16428 | 0.35 | 4   | k__Bacteria;p__Proteobacteria;c__Gammaproteobacteria;o__Enterobacteriales;f__Enterobacteriaceae;g__Enterobacter;s__Enterobacter cloacae |
| UC-151954 | 1 | 48984 | 48984 | 0     | 0     | 0                               | -           | 0     | 0    | 0   | Unknow                                                                                                                                  |
| C539-19   | 1 | 13061 | 13061 | 13006 | 99.58 | gii383101383 gb C<br>P002291.1  | 49352<br>94 | 19712 | 0.4  | 1   | k__Bacteria;p__Proteobacteria;c__Gammaproteobacteria;o__Enterobacteriales;f__Enterobacteriaceae;g__Escherichia;s__Escherichia coli      |

|         |   |       |       |       |       |                              |         |       |      |     |                                                                                                                                          |
|---------|---|-------|-------|-------|-------|------------------------------|---------|-------|------|-----|------------------------------------------------------------------------------------------------------------------------------------------|
| CS22-5  | 1 | 20852 | 20852 | 15647 | 75.04 | gii595597955 gb C P007392.1  | 5054509 | 22810 | 0.45 | 1   | k__Bacteria;p__Proteobacteria;c__Gammaproteobacteria;o__Enterobacteriales;f__Enterobacteriaceae;g__Escherichia;s__Escherichia coli       |
| CS27-3  | 1 | 12272 | 12272 | 3730  | 30.39 | gii73854091 gb CP000038.1    | 4825265 | 3764  | 0.08 | 262 | k__Bacteria;p__Proteobacteria;c__Gammaproteobacteria;o__Enterobacteriales;f__Enterobacteriaceae;g__Shigella;s__Shigella sonnei           |
| UC-242  | 1 | 11228 | 11228 | 6294  | 56.06 | gii215263233 emb FM1180568.1 | 4965553 | 6294  | 0.13 | 1   | k__Bacteria;p__Proteobacteria;c__Gammaproteobacteria;o__Enterobacteriales;f__Enterobacteriaceae;g__Escherichia;s__Escherichia coli       |
| UC-362  | 1 | 15369 | 15369 | 11195 | 72.84 | gii218350208 emb CU928145.2  | 5154862 | 11463 | 0.22 | 1   | k__Bacteria;p__Proteobacteria;c__Gammaproteobacteria;o__Enterobacteriales;f__Enterobacteriaceae;g__Escherichia;s__Escherichia coli       |
| UC-418  | 1 | 19879 | 19879 | 8268  | 41.59 | gii691220640 gb C P009454.1  | 4327607 | 8253  | 0.19 | 277 | k__Bacteria;p__Proteobacteria;c__Gammaproteobacteria;o__Enterobacteriales;f__Enterobacteriaceae;g__Pantoea;s__Pantoea rwandensis         |
| UC-424  | 1 | 19982 | 19982 | 11910 | 59.6  | gii660567586 gb C P008788.1  | 6152190 | 11891 | 0.19 | 12  | k__Bacteria;p__Proteobacteria;c__Gammaproteobacteria;o__Enterobacteriales;f__Enterobacteriaceae;g__Klebsiella;s__Klebsiella oxytoca      |
| UC-525  | 1 | 17967 | 17967 | 17967 | 100   | gii257757386 dbj AP010958.1  | 5449314 | 17967 | 0.33 | 1   | k__Bacteria;p__Proteobacteria;c__Gammaproteobacteria;o__Enterobacteriales;f__Enterobacteriaceae;g__Escherichia;s__Escherichia coli       |
| UC-536  | 1 | 11293 | 11293 | 6767  | 59.92 | gii170517292 gb C P000970.1  | 5068389 | 7769  | 0.15 | 1   | k__Bacteria;p__Proteobacteria;c__Gammaproteobacteria;o__Enterobacteriales;f__Enterobacteriaceae;g__Escherichia;s__Escherichia coli       |
| UC-765  | 1 | 17151 | 17151 | 11531 | 67.23 | gii339759707 gb C P002910.1  | 5259571 | 11867 | 0.23 | 7   | k__Bacteria;p__Proteobacteria;c__Gammaproteobacteria;o__Enterobacteriales;f__Enterobacteriaceae;g__Klebsiella;s__Klebsiella pneumoniae   |
| UC-824  | 1 | 14012 | 14012 | 14012 | 100   | gii26111730 gb AE014075.1    | 5231428 | 16064 | 0.31 | 1   | k__Bacteria;p__Proteobacteria;c__Gammaproteobacteria;o__Enterobacteriales;f__Enterobacteriaceae;g__Escherichia;s__Escherichia coli       |
| UC-827  | 1 | 20429 | 20429 | 20429 | 100   | gii309700213 emb FN649414.1  | 5153435 | 20452 | 0.4  | 1   | k__Bacteria;p__Proteobacteria;c__Gammaproteobacteria;o__Enterobacteriales;f__Enterobacteriaceae;g__Escherichia;s__Escherichia coli       |
| UC-970  | 1 | 26419 | 26419 | 19506 | 73.83 | gii394343076 gb C P003683.1  | 6097032 | 23145 | 0.38 | 12  | k__Bacteria;p__Proteobacteria;c__Gammaproteobacteria;o__Enterobacteriales;f__Enterobacteriaceae;g__Klebsiella;s__Klebsiella oxytoca      |
| UC-1019 | 1 | 12727 | 12727 | 11543 | 90.7  | gii218354981 emb CU928158.2  | 4588711 | 11541 | 0.25 | 2   | k__Bacteria;p__Proteobacteria;c__Gammaproteobacteria;o__Enterobacteriales;f__Enterobacteriaceae;g__Escherichia;s__Escherichia fergusonii |
| UC-1229 | 1 | 13353 | 13353 | 5098  | 38.18 | gii527122546 gb C P003025.1  | 1975547 | 6064  | 0.31 | 207 | k__Bacteria;p__Firmicutes;c__Bacilli;o__Lactobacillales;f__Streptococcaceae;g__Streptococcus;s__Streptococcus lutetiensis                |
| UC-1250 | 1 | 31608 | 31608 | 16778 | 53.08 | gii569550235 gb C P003999.1  | 5307003 | 18258 | 0.34 | 7   | k__Bacteria;p__Proteobacteria;c__Gammaproteobacteria;o__Enterobacteriales;f__Enterobacteriaceae;g__Klebsiella;s__Klebsiella pneumoniae   |
| UC-1256 | 1 | 16699 | 16699 | 7280  | 43.6  | gii284919779 emb FN554766.1  | 5241977 | 7280  | 0.14 | 1   | k__Bacteria;p__Proteobacteria;c__Gammaproteobacteria;o__Enterobacteriales;f__Enterobacteriaceae;g__Escherichia;s__Escherichia coli       |
| UC-1394 | 1 | 10014 | 10014 | 8124  | 81.13 | gii110613622 gb C P000266.1  | 4574284 | 6278  | 0.14 | 261 | k__Bacteria;p__Proteobacteria;c__Gammaproteobacteria;o__Enterobacteriales;f__Enterobacteriaceae;g__Shigella;s__Shigella flexneri         |
| UC-1491 | 1 | 10984 | 10984 | 10984 | 100   | gii365747213 gb C P002886.1  | 4734438 | 11127 | 0.24 | 4   | k__Bacteria;p__Proteobacteria;c__Gammaproteobacteria;o__Enterobacteriales;f__Enterobacteriaceae;g__Enterobacter;s__Enterobacter cloacae  |
| UC-1578 | 1 | 72584 | 72584 | 0     | 0     | 0                            | -       | 0     | 0    | 0   | Unknow                                                                                                                                   |
| UC-1683 | 1 | 45156 | 45156 | 35241 | 78.04 | gii554510692 gb C P006784.1  | 5129938 | 35295 | 0.69 | 1   | k__Bacteria;p__Proteobacteria;c__Gammaproteobacteria;o__Enterobacteriales;f__Enterobacteriaceae;g__Escherichia;s__Escherichia coli       |
| UC-1700 | 1 | 36482 | 36482 | 36482 | 100   | gii209157093 gb C P001164.1  | 5572075 | 36475 | 0.65 | 1   | k__Bacteria;p__Proteobacteria;c__Gammaproteobacteria;o__Enterobacteriales;f__Enterobacteriaceae;g__Escherichia;s__Escherichia coli       |
| UC-1845 | 1 | 11555 | 11555 | 9519  | 82.38 | gii402539130 gb C P003785.1  | 5386705 | 9519  | 0.18 | 7   | k__Bacteria;p__Proteobacteria;c__Gammaproteobacteria;o__Enterobacteriales;f__Enterobacteriaceae;g__Klebsiella;s__Klebsiella pneumoniae   |
| UC-1872 | 1 | 12490 | 12490 | 11749 | 94.07 | gii573966439 gb C P006027.1  | 5585613 | 11753 | 0.21 | 1   | k__Bacteria;p__Proteobacteria;c__Gammaproteobacteria;o__Enterobacteriales;f__Enterobacteriaceae;g__Escherichia;s__Escherichia coli       |
| UC-2573 | 1 | 14138 | 14138 | 10308 | 72.91 | gii310757913 gb C P002287.1  | 7013095 | 12471 | 0.18 | 462 | k__Bacteria;p__Proteobacteria;c__Betaproteobacteria;o__Burkholderiales;f__Alcaligenaceae;g__Achromobacter;s__Achromobacter xylosoxidans  |
| UC-2731 | 1 | 78557 | 78557 | 78553 | 99.99 | gii582035815 gb C P004081.1  | 2961043 | 83081 | 2.81 | 72  | k__Bacteria;p__Firmicutes;c__Bacilli;o__Lactobacillales;f__Enterococcaceae;g__Enterococcus;s__Enterococcus faecalis                      |
| UC-2845 | 1 | 16383 | 16383 | 16383 | 100   | gii209910450 dbj AP009240.1  | 4887515 | 16383 | 0.34 | 1   | k__Bacteria;p__Proteobacteria;c__Gammaproteobacteria;o__Enterobacteriales;f__Enterobacteriaceae;g__Escherichia;s__Escherichia coli       |
| UC-2941 | 1 | 19960 | 19960 | 16843 | 84.38 | gii523815970 gb C P006055.1  | 4977480 | 17288 | 0.35 | 5   | k__Bacteria;p__Proteobacteria;c__Gammaproteobacteria;o__Enterobacteriales;f__Enterobacteriaceae;g__Salmonella;s__Salmonella enterica     |

|           |   |       |       |       |       |                             |         |       |      |    |                                                                                                                                           |
|-----------|---|-------|-------|-------|-------|-----------------------------|---------|-------|------|----|-------------------------------------------------------------------------------------------------------------------------------------------|
| UC-3101   | 1 | 11728 | 11728 | 0     | 0     | 0                           | -       | 0     | 0    | 0  | Unknown                                                                                                                                   |
| UC-176707 | 1 | 15577 | 15577 | 0     | 0     | 0                           | -       | 0     | 0    | 0  | Unknown                                                                                                                                   |
| UC-177731 | 1 | 20042 | 20042 | 20005 | 99.82 | gi 406775301 gb CP003297.1  | 5253138 | 25727 | 0.49 | 1  | k__Bacteria;p__Proteobacteria;c__Gammaproteobacteria;o__Enterobacteriales;f__Enterobacteriaceae;g__Escherichia;s__Escherichia coli        |
| UC-177811 | 1 | 12184 | 12184 | 12184 | 100   | gi 595597955 gb CP007392.1  | 5054509 | 12184 | 0.24 | 1  | k__Bacteria;p__Proteobacteria;c__Gammaproteobacteria;o__Enterobacteriales;f__Enterobacteriaceae;g__Escherichia;s__Escherichia coli        |
| UC-186777 | 1 | 13762 | 13762 | 0     | 0     | 0                           | -       | 0     | 0    | 0  | Unknown                                                                                                                                   |
| UC-187176 | 1 | 13433 | 13433 | 0     | 0     | 0                           | -       | 0     | 0    | 0  | Unknown                                                                                                                                   |
| UC-187526 | 1 | 44646 | 44646 | 15250 | 34.16 | gi 662712225 gb CP008823.1  | 4852980 | 15274 | 0.31 | 4  | k__Bacteria;p__Proteobacteria;c__Gammaproteobacteria;o__Enterobacteriales;f__Enterobacteriaceae;g__Enterobacter;s__Enterobacter cloacae   |
| UC-201392 | 1 | 11330 | 11330 | 6268  | 55.32 | gi 206564770 gb CP000964.1  | 5641239 | 6254  | 0.11 | 7  | k__Bacteria;p__Proteobacteria;c__Gammaproteobacteria;o__Enterobacteriales;f__Enterobacteriaceae;g__Klebsiella;s__Klebsiella pneumoniae    |
| UC-201428 | 1 | 12559 | 12559 | 8131  | 64.74 | gi 675820478 emb LM997040.1 | 1374643 | 8135  | 0.59 | 1  | k__Bacteria;p__Proteobacteria;c__Gammaproteobacteria;o__Enterobacteriales;f__Enterobacteriaceae;g__Escherichia;s__Escherichia coli        |
| UC-201457 | 1 | 18687 | 18687 | 18687 | 100   | gi 26111730 gb AE014075.1   | 5231428 | 21473 | 0.41 | 1  | k__Bacteria;p__Proteobacteria;c__Gammaproteobacteria;o__Enterobacteriales;f__Enterobacteriaceae;g__Escherichia;s__Escherichia coli        |
| UC-201528 | 1 | 12658 | 12658 | 12658 | 100   | gi 26111730 gb AE014075.1   | 5231428 | 12658 | 0.24 | 1  | k__Bacteria;p__Proteobacteria;c__Gammaproteobacteria;o__Enterobacteriales;f__Enterobacteriaceae;g__Escherichia;s__Escherichia coli        |
| UC-201640 | 1 | 16846 | 16846 | 6016  | 35.71 | gi 523806722 gb CP006048.1  | 4859931 | 24500 | 0.5  | 5  | k__Bacteria;p__Proteobacteria;c__Gammaproteobacteria;o__Enterobacteriales;f__Enterobacteriaceae;g__Salmonella;s__Salmonella enterica      |
| UC-201691 | 1 | 19384 | 19384 | 0     | 0     | 0                           | -       | 0     | 0    | 0  | Unknown                                                                                                                                   |
| UC-202265 | 1 | 11600 | 11600 | 7863  | 67.78 | gi 355418401 gb CP002211.1  | 5038386 | 7863  | 0.16 | 1  | k__Bacteria;p__Proteobacteria;c__Gammaproteobacteria;o__Enterobacteriales;f__Enterobacteriaceae;g__Escherichia;s__Escherichia coli        |
| UC-202793 | 1 | 10078 | 10078 | 10078 | 100   | gi 334732565 gb CP002824.1  | 5280350 | 10078 | 0.19 | 15 | k__Bacteria;p__Proteobacteria;c__Gammaproteobacteria;o__Enterobacteriales;f__Enterobacteriaceae;g__Enterobacter;s__Enterobacter aerogenes |
| UC-202834 | 1 | 13209 | 13209 | 13209 | 100   | gi 443901024 emb F0203355.1 | 5419609 | 13209 | 0.24 | 15 | k__Bacteria;p__Proteobacteria;c__Gammaproteobacteria;o__Enterobacteriales;f__Enterobacteriaceae;g__Enterobacter;s__Enterobacter aerogenes |
| UC-202961 | 1 | 10623 | 10623 | 5267  | 49.58 | gi 334732565 gb CP002824.1  | 5280350 | 5345  | 0.1  | 15 | k__Bacteria;p__Proteobacteria;c__Gammaproteobacteria;o__Enterobacteriales;f__Enterobacteriaceae;g__Enterobacter;s__Enterobacter aerogenes |
| UC-212127 | 1 | 10872 | 10872 | 0     | 0     | 0                           | -       | 0     | 0    | 0  | Unknown                                                                                                                                   |
| UC-212461 | 1 | 14879 | 14879 | 14865 | 99.91 | gi 383101383 gb CP002291.1  | 4935294 | 24986 | 0.51 | 1  | k__Bacteria;p__Proteobacteria;c__Gammaproteobacteria;o__Enterobacteriales;f__Enterobacteriaceae;g__Escherichia;s__Escherichia coli        |



|           |   |       |       |       |       |                              |         |       |      |     |                                                                                                                                                |
|-----------|---|-------|-------|-------|-------|------------------------------|---------|-------|------|-----|------------------------------------------------------------------------------------------------------------------------------------------------|
| UC-21288  | 1 | 23732 | 23732 | 11754 | 49.53 | gii660567586 gb C P008788.1  | 6152190 | 12459 | 0.2  | 12  | k__Bacteria;p__Proteobacteria;c__Gammaproteobacteria;o__Enterobacteriales;f__Enterobacteriaceae;g__Klebsiella;a;s__Klebsiella oxytoca          |
| UC-213590 | 1 | 11560 | 11560 | 6725  | 58.17 | gii640850664 gb C P007731.1  | 5241638 | 6825  | 0.13 | 7   | k__Bacteria;p__Proteobacteria;c__Gammaproteobacteria;o__Enterobacteriales;f__Enterobacteriaceae;g__Klebsiella;a;s__Klebsiella pneumoniae       |
| UC-213693 | 1 | 11057 | 11057 | 10702 | 96.79 | gii364515570 gb C P003200.1  | 5333942 | 10914 | 0.2  | 7   | k__Bacteria;p__Proteobacteria;c__Gammaproteobacteria;o__Enterobacteriales;f__Enterobacteriaceae;g__Klebsiella;a;s__Klebsiella pneumoniae       |
| UC-215113 | 1 | 10648 | 10648 | 7920  | 74.38 | gii595597955 gb C P007392.1  | 5054509 | 8209  | 0.16 | 1   | k__Bacteria;p__Proteobacteria;c__Gammaproteobacteria;o__Enterobacteriales;f__Enterobacteriaceae;g__Escherichia;a;s__Escherichia coli           |
| UC-215119 | 1 | 18296 | 18296 | 18296 | 100   | gii339759707 gb C P002910.1  | 5259571 | 18559 | 0.35 | 7   | k__Bacteria;p__Proteobacteria;c__Gammaproteobacteria;o__Enterobacteriales;f__Enterobacteriaceae;g__Klebsiella;a;s__Klebsiella pneumoniae       |
| UC-215123 | 1 | 21625 | 21625 | 0     | 0     | 0                            | -       | 0     | 0    | 0   | Unknown                                                                                                                                        |
| UC-3784   | 1 | 39440 | 39440 | 34312 | 87    | gii157076741 gb C P000800.1  | 4979619 | 34278 | 0.69 | 1   | k__Bacteria;p__Proteobacteria;c__Gammaproteobacteria;o__Enterobacteriales;f__Enterobacteriaceae;g__Escherichia;a;s__Escherichia coli           |
| UC-3817   | 1 | 72883 | 72883 | 41349 | 56.73 | gii660567586 gb C P008788.1  | 6152190 | 45220 | 0.74 | 12  | k__Bacteria;p__Proteobacteria;c__Gammaproteobacteria;o__Enterobacteriales;f__Enterobacteriaceae;g__Klebsiella;a;s__Klebsiella oxytoca          |
| UC-3865   | 1 | 22923 | 22923 | 18056 | 78.77 | gii364515570 gb C P003200.1  | 5333942 | 18925 | 0.35 | 7   | k__Bacteria;p__Proteobacteria;c__Gammaproteobacteria;o__Enterobacteriales;f__Enterobacteriaceae;g__Klebsiella;a;s__Klebsiella pneumoniae       |
| UC-4008   | 1 | 13846 | 13846 | 0     | 0     | 0                            | -       | 0     | 0    | 0   | Unknown                                                                                                                                        |
| UC-4054   | 1 | 16308 | 16308 | 8568  | 52.54 | gii564743501 gb C P005995.1  | 4783867 | 8570  | 0.18 | 5   | k__Bacteria;p__Proteobacteria;c__Gammaproteobacteria;o__Enterobacteriales;f__Enterobacteriaceae;g__Salmonella;a;s__Salmonella enterica         |
| UC-4146   | 1 | 16250 | 16250 | 9369  | 57.66 | gii443901024 emb  F0203355.1 | 5419609 | 9505  | 0.18 | 15  | k__Bacteria;p__Proteobacteria;c__Gammaproteobacteria;o__Enterobacteriales;f__Enterobacteriaceae;g__Enterobacter;a;s__Enterobacter aerogenes    |
| UC-4380   | 1 | 16362 | 16362 | 10057 | 61.47 | gii573966439 gb C P006027.1  | 5585613 | 8793  | 0.16 | 1   | k__Bacteria;p__Proteobacteria;c__Gammaproteobacteria;o__Enterobacteriales;f__Enterobacteriaceae;g__Escherichia;a;s__Escherichia coli           |
| UC-4423   | 1 | 12610 | 12610 | 12610 | 100   | gii554510692 gb C P006784.1  | 5129938 | 13025 | 0.25 | 1   | k__Bacteria;p__Proteobacteria;c__Gammaproteobacteria;o__Enterobacteriales;f__Enterobacteriaceae;g__Escherichia;a;s__Escherichia coli           |
| UC-4481   | 1 | 19781 | 19781 | 19633 | 99.25 | gii187427012 gb C P001063.1  | 4615997 | 48100 | 1.04 | 263 | k__Bacteria;p__Proteobacteria;c__Gammaproteobacteria;o__Enterobacteriales;f__Enterobacteriaceae;g__Shigella;a;s__Shigella boydii               |
| UC-4681   | 1 | 19559 | 19559 | 0     | 0     | 0                            | -       | 0     | 0    | 0   | Unknown                                                                                                                                        |
| UC-4948   | 1 | 15385 | 15385 | 9928  | 64.53 | gii365747213 gb C P002886.1  | 4734438 | 14794 | 0.31 | 4   | k__Bacteria;p__Proteobacteria;c__Gammaproteobacteria;o__Enterobacteriales;f__Enterobacteriaceae;g__Enterobacter;a;s__Enterobacter cloacae      |
| UC-5340   | 1 | 15418 | 15418 | 0     | 0     | 0                            | -       | 0     | 0    | 0   | Unknown                                                                                                                                        |
| UC-5358   | 1 | 10181 | 10181 | 10118 | 99.38 | gii206564770 gb C P000964.1  | 5641239 | 10202 | 0.18 | 7   | k__Bacteria;p__Proteobacteria;c__Gammaproteobacteria;o__Enterobacteriales;f__Enterobacteriaceae;g__Klebsiella;a;s__Klebsiella pneumoniae       |
| UC-5370   | 1 | 12738 | 12738 | 10040 | 78.82 | gii157081501 gb C P000822.1  | 4720462 | 12297 | 0.26 | 6   | k__Bacteria;p__Proteobacteria;c__Gammaproteobacteria;o__Enterobacteriales;f__Enterobacteriaceae;g__Citrobacter;a;s__Citrobacter koseri         |
| UC-5427   | 1 | 13386 | 13386 | 10091 | 75.38 | gii308746527 gb C P002272.1  | 4814049 | 10090 | 0.21 | 8   | k__Bacteria;p__Proteobacteria;c__Gammaproteobacteria;o__Enterobacteriales;f__Enterobacteriaceae;g__Enterobacter;a;s__Enterobacter lignolyticus |
| UC-5808   | 1 | 13729 | 13729 | 13729 | 100   | gii218430358 emb  CU928163.2 | 5202090 | 13729 | 0.26 | 1   | k__Bacteria;p__Proteobacteria;c__Gammaproteobacteria;o__Enterobacteriales;f__Enterobacteriaceae;g__Escherichia;a;s__Escherichia coli           |
| UC-6256   | 1 | 11680 | 11680 | 6642  | 56.87 | gii585129876 gb C P006713.1  | 2359009 | 6643  | 0.28 | 895 | k__Bacteria;p__Actinobacteria;c__Actinobacteria;o__Bifidobacteriales;f__Bifidobacteriaceae;g__Bifidobacterium;a;s__Bifidobacterium breve       |
| UC-6479   | 1 | 13261 | 13261 | 12312 | 92.84 | gii187427012 gb C P001063.1  | 4615997 | 23728 | 0.51 | 263 | k__Bacteria;p__Proteobacteria;c__Gammaproteobacteria;o__Enterobacteriales;f__Enterobacteriaceae;g__Shigella;a;s__Shigella boydii               |
| UC-6503   | 1 | 18792 | 18792 | 17379 | 92.48 | gii394343076 gb C P003683.1  | 6097032 | 18426 | 0.3  | 12  | k__Bacteria;p__Proteobacteria;c__Gammaproteobacteria;o__Enterobacteriales;f__Enterobacteriaceae;g__Klebsiella;a;s__Klebsiella oxytoca          |

|           |   |       |       |       |       |                             |         |       |      |     |                                                                                                                                         |
|-----------|---|-------|-------|-------|-------|-----------------------------|---------|-------|------|-----|-----------------------------------------------------------------------------------------------------------------------------------------|
| UC-7012   | 1 | 10535 | 10535 | 10535 | 100   | gii110341805 gb C P000247.1 | 4938920 | 10558 | 0.21 | 1   | k__Bacteria;p__Proteobacteria;c__Gammaproteobacteria;o__Enterobacteriales;f__Enterobacteriaceae;g__Escherichia;s__Escherichia coli      |
| UC-7325   | 1 | 10484 | 10484 | 10484 | 100   | gii573966439 gb C P006027.1 | 5585613 | 18286 | 0.33 | 1   | k__Bacteria;p__Proteobacteria;c__Gammaproteobacteria;o__Enterobacteriales;f__Enterobacteriaceae;g__Escherichia;s__Escherichia coli      |
| UC-7527   | 1 | 16168 | 16168 | 16168 | 100   | gii218350208 emb CU928145.2 | 5154862 | 16168 | 0.31 | 1   | k__Bacteria;p__Proteobacteria;c__Gammaproteobacteria;o__Enterobacteriales;f__Enterobacteriaceae;g__Escherichia;s__Escherichia coli      |
| UC-7531   | 1 | 10039 | 10039 | 6145  | 61.21 | gii383101383 gb C P002291.1 | 4935294 | 6172  | 0.13 | 1   | k__Bacteria;p__Proteobacteria;c__Gammaproteobacteria;o__Enterobacteriales;f__Enterobacteriaceae;g__Escherichia;s__Escherichia coli      |
| UC-7730   | 1 | 36384 | 36384 | 0     | 0     | 0                           | -       | 0     | 0    | 0   | Unknow                                                                                                                                  |
| UC-7893   | 1 | 16131 | 16131 | 0     | 0     | 0                           | -       | 0     | 0    | 0   | Unknow                                                                                                                                  |
| UC-217427 | 1 | 11668 | 11668 | 0     | 0     | 0                           | -       | 0     | 0    | 0   | Unknow                                                                                                                                  |
| UC-217628 | 1 | 12593 | 12593 | 8117  | 64.46 | gii215263233 emb FM180568.1 | 4965553 | 8121  | 0.16 | 1   | k__Bacteria;p__Proteobacteria;c__Gammaproteobacteria;o__Enterobacteriales;f__Enterobacteriaceae;g__Escherichia;s__Escherichia coli      |
| UC-217652 | 1 | 19479 | 19479 | 0     | 0     | 0                           | -       | 0     | 0    | 0   | Unknow                                                                                                                                  |
| UC-224107 | 1 | 11349 | 11349 | 11349 | 100   | gii309700213 emb FN649414.1 | 5153435 | 11349 | 0.22 | 1   | k__Bacteria;p__Proteobacteria;c__Gammaproteobacteria;o__Enterobacteriales;f__Enterobacteriaceae;g__Escherichia;s__Escherichia coli      |
| UC-225189 | 1 | 25498 | 25498 | 0     | 0     | 0                           | -       | 0     | 0    | 0   | Unknow                                                                                                                                  |
| UC-226407 | 1 | 17816 | 17816 | 17306 | 97.14 | gii386922183 gb C P001560.1 | 4158725 | 17309 | 0.42 | 273 | k__Bacteria;p__Proteobacteria;c__Gammaproteobacteria;o__Enterobacteriales;f__Enterobacteriaceae;g__Shimwellia;s__Shimwellia blattae     |
| UC-226418 | 1 | 12528 | 12528 | 0     | 0     | 0                           | -       | 0     | 0    | 0   | Unknow                                                                                                                                  |
| UC-226440 | 1 | 13735 | 13735 | 0     | 0     | 0                           | -       | 0     | 0    | 0   | Unknow                                                                                                                                  |
| UC-227493 | 1 | 11759 | 11759 | 6355  | 54.04 | gii339277069 emb FR875178.1 | 1929905 | 6353  | 0.33 | 379 | k__Bacteria;p__Firmicutes;c__Bacilli;o__Lactobacillales;f__Streptococcaceae;g__Streptococcus;s__Streptococcus thermophilus              |
| UC-227495 | 1 | 12478 | 12478 | 5736  | 45.97 | gii696593549 gb C P009565.1 | 4726694 | 5732  | 0.12 | 5   | k__Bacteria;p__Proteobacteria;c__Gammaproteobacteria;o__Enterobacteriales;f__Enterobacteriaceae;g__Salmonella;s__Salmonella enterica    |
| UC-227496 | 1 | 13636 | 13636 | 5182  | 38    | gii662712225 gb C P008823.1 | 4852980 | 5187  | 0.11 | 4   | k__Bacteria;p__Proteobacteria;c__Gammaproteobacteria;o__Enterobacteriales;f__Enterobacteriaceae;g__Enterobacter;s__Enterobacter cloacae |
| UC-227530 | 1 | 23818 | 23818 | 7771  | 32.63 | gii582030173 gb C P006659.1 | 5435369 | 8609  | 0.16 | 7   | k__Bacteria;p__Proteobacteria;c__Gammaproteobacteria;o__Enterobacteriales;f__Enterobacteriaceae;g__Klebsiella;s__Klebsiella pneumoniae  |
| UC-227536 | 1 | 12276 | 12276 | 10150 | 82.68 | gii339759707 gb C P002910.1 | 5259571 | 10137 | 0.19 | 7   | k__Bacteria;p__Proteobacteria;c__Gammaproteobacteria;o__Enterobacteriales;f__Enterobacteriaceae;g__Klebsiella;s__Klebsiella pneumoniae  |
| UC-227662 | 1 | 11620 | 11620 | 4519  | 38.89 | gii559161187 gb C P006811.1 | 1887251 | 3896  | 0.21 | 193 | k__Bacteria;p__Firmicutes;c__Bacilli;o__Lactobacillales;f__Lactobacillaceae;g__Lactobacillus;s__Lactobacillus johnsonii                 |
| UC-22768  | 1 | 13485 | 13485 | 13485 | 100   | gii365906294 gb C P003218.1 | 5974109 | 13678 | 0.23 | 12  | k__Bacteria;p__Proteobacteria;c__Gammaproteobacteria;o__Enterobacteriales;f__Enterobacteriaceae;g__Klebsiella;s__Klebsiella oxytoca     |

|           |   |       |       |       |       |                             |         |       |      |     |                                                                                                                                        |  |
|-----------|---|-------|-------|-------|-------|-----------------------------|---------|-------|------|-----|----------------------------------------------------------------------------------------------------------------------------------------|--|
| 1         |   |       |       |       |       |                             |         |       |      |     |                                                                                                                                        |  |
| UC-227685 | 1 | 10797 | 10797 | 10795 | 99.98 | gii569535620 gb C P007025.1 | 4701875 | 13276 | 0.28 | 264 | k__Bacteria;p__Proteobacteria;c__Gammaproteobacteria;o__Enterobacteriales;f__Enterobacteriaceae;g__Escherichia;s__Escherichia albertii |  |
| UC-227755 | 1 | 18886 | 18886 | 0     | 0     | 0                           | -       | 0     | 0    | 0   | Unknow                                                                                                                                 |  |
| UC-227763 | 1 | 11215 | 11215 | 0     | 0     | 0                           | -       | 0     | 0    | 0   | Unknow                                                                                                                                 |  |
| UC-227780 | 1 | 11136 | 11136 | 11136 | 100   | gii569535620 gb C P007025.1 | 4701875 | 12135 | 0.26 | 264 | k__Bacteria;p__Proteobacteria;c__Gammaproteobacteria;o__Enterobacteriales;f__Enterobacteriaceae;g__Escherichia;s__Escherichia albertii |  |
| UC-227905 | 1 | 13024 | 13024 | 13024 | 100   | gii569535620 gb C P007025.1 | 4701875 | 13025 | 0.28 | 264 | k__Bacteria;p__Proteobacteria;c__Gammaproteobacteria;o__Enterobacteriales;f__Enterobacteriaceae;g__Escherichia;s__Escherichia albertii |  |
| UC-228815 | 1 | 10916 | 10916 | 10916 | 100   | gii569535620 gb C P007025.1 | 4701875 | 11404 | 0.24 | 264 | k__Bacteria;p__Proteobacteria;c__Gammaproteobacteria;o__Enterobacteriales;f__Enterobacteriaceae;g__Escherichia;s__Escherichia albertii |  |
| UC-229010 | 1 | 13453 | 13453 | 13449 | 99.97 | gii569535620 gb C P007025.1 | 4701875 | 14837 | 0.32 | 264 | k__Bacteria;p__Proteobacteria;c__Gammaproteobacteria;o__Enterobacteriales;f__Enterobacteriaceae;g__Escherichia;s__Escherichia albertii |  |
| UC-229103 | 1 | 19213 | 19213 | 8185  | 42.6  | gii573932891 gb C P006262.1 | 5402276 | 8462  | 0.16 | 1   | k__Bacteria;p__Proteobacteria;c__Gammaproteobacteria;o__Enterobacteriales;f__Enterobacteriaceae;g__Escherichia;s__Escherichia coli     |  |
| UC-230105 | 1 | 13033 | 13033 | 8480  | 65.07 | gii332341332 gb C P002729.1 | 5186416 | 8474  | 0.16 | 1   | k__Bacteria;p__Proteobacteria;c__Gammaproteobacteria;o__Enterobacteriales;f__Enterobacteriaceae;g__Escherichia;s__Escherichia coli     |  |
| UC-230116 | 1 | 21369 | 21369 | 20932 | 97.95 | gii333109300 gb C P002743.1 | 2327492 | 21235 | 0.91 | 895 | k__Bacteria;p__Actinobacteria;c__Actinobacteria;o__Bifidobacteriales;f__Bifidobacteriaceae;g__Bifidobacterium;s__Bifidobacterium breve |  |
| UC-233196 | 1 | 10670 | 10670 | 0     | 0     | 0                           | -       | 0     | 0    | 0   | Unknow                                                                                                                                 |  |
| UC-236879 | 1 | 16879 | 16879 | 0     | 0     | 0                           | -       | 0     | 0    | 0   | Unknow                                                                                                                                 |  |
| UC-240648 | 1 | 13039 | 13039 | 11419 | 87.58 | gii333109300 gb C P002743.1 | 2327492 | 13155 | 0.57 | 895 | k__Bacteria;p__Actinobacteria;c__Actinobacteria;o__Bifidobacteriales;f__Bifidobacteriaceae;g__Bifidobacterium;s__Bifidobacterium breve |  |
| UC-8354   | 1 | 23037 | 23037 | 13343 | 57.92 | gii110341805 gb C P000247.1 | 4938920 | 13341 | 0.27 | 1   | k__Bacteria;p__Proteobacteria;c__Gammaproteobacteria;o__Enterobacteriales;f__Enterobacteriaceae;g__Escherichia;s__Escherichia coli     |  |
| UC-8356   | 1 | 22525 | 22525 | 7973  | 35.4  | gii674133359 gb C P009208.1 | 5374834 | 12780 | 0.24 | 7   | k__Bacteria;p__Proteobacteria;c__Gammaproteobacteria;o__Enterobacteriales;f__Enterobacteriaceae;g__Klebsiella;s__Klebsiella pneumoniae |  |
| UC-9375   | 1 | 10886 | 10886 | 0     | 0     | 0                           | -       | 0     | 0    | 0   | Unknow                                                                                                                                 |  |
| UC-9468   | 1 | 28270 | 28270 | 28270 | 100   | gii170517292 gb C P000970.1 | 5068389 | 30807 | 0.61 | 1   | k__Bacteria;p__Proteobacteria;c__Gammaproteobacteria;o__Enterobacteriales;f__Enterobacteriaceae;g__Escherichia;s__Escherichia coli     |  |
| UC-9476   | 1 | 17755 | 17755 | 14562 | 82.02 | gii257757386 dbj AP010958.1 | 5449314 | 14554 | 0.27 | 1   | k__Bacteria;p__Proteobacteria;c__Gammaproteobacteria;o__Enterobacteriales;f__Enterobacteriaceae;g__Escherichia;s__Escherichia coli     |  |
| UC-9481   | 1 | 15319 | 15319 | 15319 | 100   | gii115511419 gb C P000468.1 | 5082025 | 16351 | 0.32 | 1   | k__Bacteria;p__Proteobacteria;c__Gammaproteobacteria;o__Enterobacteriales;f__Enterobacteriaceae;g__Escherichia;s__Escherichia coli     |  |
| UC-9490   | 1 | 10749 | 10749 | 8940  | 83.17 | gii218350208 emb CU928145.2 | 5154862 | 8913  | 0.17 | 1   | k__Bacteria;p__Proteobacteria;c__Gammaproteobacteria;o__Enterobacteriales;f__Enterobacteriaceae;g__Escherichia;s__Escherichia coli     |  |

|           |   |       |       |       |       |                             |         |        |      |     |                                                                                                                                          |
|-----------|---|-------|-------|-------|-------|-----------------------------|---------|--------|------|-----|------------------------------------------------------------------------------------------------------------------------------------------|
| UC-10414  | 1 | 18921 | 18921 | 18921 | 100   | gii307551844 gb C P001671.1 | 5131397 | 19872  | 0.39 | 1   | k__Bacteria;p__Proteobacteria;c__Gammaproteobacteria;o__Enterobacteriales;f__Enterobacteriaceae;g__Escherichia;s__Escherichia coli       |
| UC-10421  | 1 | 10038 | 10038 | 3139  | 31.27 | gii187427012 gb C P001063.1 | 4615997 | 100710 | 2.18 | 263 | k__Bacteria;p__Proteobacteria;c__Gammaproteobacteria;o__Enterobacteriales;f__Enterobacteriaceae;g__Shigella;s__Shigella boydii           |
| UC-10682  | 1 | 11646 | 11646 | 10002 | 85.88 | gii218350208 emb CU928145.2 | 5154862 | 15120  | 0.29 | 1   | k__Bacteria;p__Proteobacteria;c__Gammaproteobacteria;o__Enterobacteriales;f__Enterobacteriaceae;g__Escherichia;s__Escherichia coli       |
| UC-10915  | 1 | 42999 | 42999 | 0     | 0     | 0                           | -       | 0      | 0    | 0   | Unknow                                                                                                                                   |
| UC-11344  | 1 | 68479 | 68479 | 35513 | 51.86 | gii526125113 gb C P006608.1 | 4683551 | 35505  | 0.76 | 13  | k__Bacteria;p__Proteobacteria;c__Gammaproteobacteria;o__Enterobacteriales;f__Enterobacteriaceae;g__Salmonella;s__Salmonella bongori      |
| UC-11421  | 1 | 10329 | 10329 | 10329 | 100   | gii257751862 dbj AP010953.1 | 5697240 | 10329  | 0.18 | 1   | k__Bacteria;p__Proteobacteria;c__Gammaproteobacteria;o__Enterobacteriales;f__Enterobacteriaceae;g__Escherichia;s__Escherichia coli       |
| UC-11669  | 1 | 13717 | 13717 | 6522  | 47.55 | gii605537200 gb C P007533.1 | 4603849 | 8041   | 0.17 | 5   | k__Bacteria;p__Proteobacteria;c__Gammaproteobacteria;o__Enterobacteriales;f__Enterobacteriaceae;g__Salmonella;s__Salmonella enterica     |
| UC-11863  | 1 | 12034 | 12034 | 5606  | 46.58 | gii523815970 gb C P006055.1 | 4977480 | 6599   | 0.13 | 5   | k__Bacteria;p__Proteobacteria;c__Gammaproteobacteria;o__Enterobacteriales;f__Enterobacteriaceae;g__Salmonella;s__Salmonella enterica     |
| UC-11864  | 1 | 10066 | 10066 | 8443  | 83.88 | gii187427012 gb C P001063.1 | 4615997 | 8439   | 0.18 | 263 | k__Bacteria;p__Proteobacteria;c__Gammaproteobacteria;o__Enterobacteriales;f__Enterobacteriaceae;g__Shigella;s__Shigella boydii           |
| UC-12182  | 1 | 14752 | 14752 | 0     | 0     | 0                           | -       | 0      | 0    | 0   | Unknow                                                                                                                                   |
| UC-12289  | 1 | 15880 | 15880 | 0     | 0     | 0                           | -       | 0      | 0    | 0   | Unknow                                                                                                                                   |
| UC-12430  | 1 | 29018 | 29018 | 21910 | 75.5  | gii674299053 gb C P009072.1 | 5130767 | 25851  | 0.5  | 1   | k__Bacteria;p__Proteobacteria;c__Gammaproteobacteria;o__Enterobacteriales;f__Enterobacteriaceae;g__Escherichia;s__Escherichia coli       |
| UC-281134 | 1 | 58549 | 58549 | 0     | 0     | 0                           | -       | 0      | 0    | 0   | Unknow                                                                                                                                   |
| UC-281383 | 1 | 13053 | 13053 | 12898 | 98.81 | gii218354981 emb CU928158.2 | 4588711 | 12898  | 0.28 | 2   | k__Bacteria;p__Proteobacteria;c__Gammaproteobacteria;o__Enterobacteriales;f__Enterobacteriaceae;g__Escherichia;s__Escherichia fergusonii |
| UC-284586 | 1 | 12788 | 12788 | 8819  | 68.96 | gii575870901 emb HG530068.1 | 7586152 | 14282  | 0.19 | 352 | k__Bacteria;p__Proteobacteria;c__Gammaproteobacteria;o__Pseudomonadales;f__Pseudomonadaceae;g__Pseudomonas;s__Pseudomonas aeruginosa     |
| UC-295887 | 1 | 12391 | 12391 | 7794  | 62.9  | gii619734722 gb C P007557.1 | 5099034 | 9438   | 0.19 | 267 | k__Bacteria;p__Proteobacteria;c__Gammaproteobacteria;o__Enterobacteriales;f__Enterobacteriaceae;g__Citrobacter;s__Citrobacter freundii   |
| UC-297627 | 1 | 22952 | 22952 | 0     | 0     | 0                           | -       | 0      | 0    | 0   | Unknow                                                                                                                                   |
| UC-298927 | 1 | 12584 | 12584 | 8720  | 69.29 | gii667708115 gb C P006798.1 | 5348284 | 8703   | 0.16 | 7   | k__Bacteria;p__Proteobacteria;c__Gammaproteobacteria;o__Enterobacteriales;f__Enterobacteriaceae;g__Klebsiella;s__Klebsiella pneumoniae   |
| UC-300068 | 1 | 11959 | 11959 | 0     | 0     | 0                           | -       | 0      | 0    | 0   | Unknow                                                                                                                                   |
| UC-300082 | 1 | 10692 | 10692 | 4448  | 41.6  | gii291558333 emb FP929061.1 | 3114788 | 4547   | 0.15 | 33  | k__Bacteria;p__Firmicutes;c__Clostridia;o__Clostridiales;f__Unclassified;g__Unclassified;s__butyrate-producing bacterium SSC/2           |
| UC-303369 | 1 | 36840 | 36840 | 0     | 0     | 0                           | -       | 0      | 0    | 0   | Unknow                                                                                                                                   |
| UC-12997  | 1 | 37642 | 37642 | 30582 | 81.24 | gii187427012 gb C P001063.1 | 4615997 | 33080  | 0.72 | 263 | k__Bacteria;p__Proteobacteria;c__Gammaproteobacteria;o__Enterobacteriales;f__Enterobacteriaceae;g__Shigella;s__Shigella boydii           |
| UC-13142  | 1 | 12970 | 12970 | 0     | 0     | 0                           | -       | 0      | 0    | 0   | Unknow                                                                                                                                   |

|           |   |       |       |       |       |                             |         |       |      |     |                                                                                                                                         |
|-----------|---|-------|-------|-------|-------|-----------------------------|---------|-------|------|-----|-----------------------------------------------------------------------------------------------------------------------------------------|
| UC-13448  | 1 | 11894 | 11894 | 4258  | 35.8  | gii73854091 gb CP000038.1   | 4825265 | 4288  | 0.09 | 262 | k__Bacteria;p__Proteobacteria;c__Gammaproteobacteria;o__Enterobacteriales;f__Enterobacteriaceae;g__Shigella;s__Shigella_sonnei          |
| UC-15672  | 1 | 48875 | 48875 | 21052 | 43.07 | gii660577155 gb CP008797.1  | 5396164 | 22844 | 0.42 | 7   | k__Bacteria;p__Proteobacteria;c__Gammaproteobacteria;o__Enterobacteriales;f__Enterobacteriaceae;g__Klebsiella;a__Klebsiella_pneumoniae  |
| UC-15719  | 1 | 14536 | 14536 | 14536 | 100   | gii674133359 gb CP009208.1  | 5374834 | 14536 | 0.27 | 7   | k__Bacteria;p__Proteobacteria;c__Gammaproteobacteria;o__Enterobacteriales;f__Enterobacteriaceae;g__Klebsiella;a__Klebsiella_pneumoniae  |
| UC-15931  | 1 | 14488 | 14488 | 0     | 0     | 0                           | -       | 0     | 0    | 0   | Unknow                                                                                                                                  |
| UC-16995  | 1 | 45265 | 45265 | 0     | 0     | 0                           | -       | 0     | 0    | 0   | Unknow                                                                                                                                  |
| UC-320067 | 1 | 20647 | 20647 | 17718 | 85.81 | gii115249003 emb AM180355.1 | 4290252 | 17734 | 0.41 | 22  | k__Bacteria;p__Firmicutes;c__Clostridia;o__Clostridiales;f__Peptostreptococcaceae;g__Peptoclostridium;s__Peptoclostridium_difficile     |
| UC-325828 | 1 | 41458 | 41458 | 0     | 0     | 0                           | -       | 0     | 0    | 0   | Unknow                                                                                                                                  |
| UC-325917 | 1 | 13473 | 13473 | 7182  | 53.31 | gii309700213 emb FN649414.1 | 5153435 | 7223  | 0.14 | 1   | k__Bacteria;p__Proteobacteria;c__Gammaproteobacteria;o__Enterobacteriales;f__Enterobacteriaceae;g__Escherichia;s__Escherichia_coli      |
| UC-325997 | 1 | 22048 | 22048 | 17549 | 79.59 | gii549815675 gb CP006648.1  | 5166857 | 17548 | 0.34 | 7   | k__Bacteria;p__Proteobacteria;c__Gammaproteobacteria;o__Enterobacteriales;f__Enterobacteriaceae;g__Klebsiella;a__Klebsiella_pneumoniae  |
| UC-326106 | 1 | 10738 | 10738 | 4228  | 39.37 | gii523806722 gb CP006048.1  | 4859931 | 10604 | 0.22 | 5   | k__Bacteria;p__Proteobacteria;c__Gammaproteobacteria;o__Enterobacteriales;f__Enterobacteriaceae;g__Salmonella;s__Salmonella_enterica    |
| UC-326245 | 1 | 22248 | 22248 | 11583 | 52.06 | gii660567586 gb CP008788.1  | 6152190 | 11561 | 0.19 | 12  | k__Bacteria;p__Proteobacteria;c__Gammaproteobacteria;o__Enterobacteriales;f__Enterobacteriaceae;g__Klebsiella;a__Klebsiella_oxytoca     |
| UC-327575 | 1 | 10386 | 10386 | 6816  | 65.63 | gii523815970 gb CP006055.1  | 4977480 | 7082  | 0.14 | 5   | k__Bacteria;p__Proteobacteria;c__Gammaproteobacteria;o__Enterobacteriales;f__Enterobacteriaceae;g__Salmonella;s__Salmonella_enterica    |
| UC-327576 | 1 | 11113 | 11113 | 6387  | 57.47 | gii570286338 gb CP006580.1  | 5369929 | 6387  | 0.12 | 4   | k__Bacteria;p__Proteobacteria;c__Gammaproteobacteria;o__Enterobacteriales;f__Enterobacteriaceae;g__Enterobacter;s__Enterobacter_cloacae |
| UC-330826 | 1 | 14468 | 14468 | 12648 | 87.42 | gii595583568 gb CP007265.1  | 4758629 | 12644 | 0.27 | 1   | k__Bacteria;p__Proteobacteria;c__Gammaproteobacteria;o__Enterobacteriales;f__Enterobacteriaceae;g__Escherichia;s__Escherichia_coli      |
| UC-17274  | 1 | 15173 | 15173 | 15173 | 100   | gii254044096 gb CP001617.1  | 3197759 | 15174 | 0.47 | 385 | k__Bacteria;p__Firmicutes;c__Bacilli;o__Lactobacillales;f__Lactobacillaceae;g__Lactobacillus;s__Lactobacillus_plantarum                 |
| UC-17674  | 1 | 13418 | 13418 | 0     | 0     | 0                           | -       | 0     | 0    | 0   | Unknow                                                                                                                                  |
| UC-17818  | 1 | 15395 | 15395 | 10282 | 66.79 | gii350278064 gb CP003058.1  | 2487765 | 10540 | 0.42 | 606 | k__Bacteria;p__Firmicutes;c__Negativicutes;o__Selenomonadales;f__Acidaminococcaceae;g__Acidaminococcus;s__Acidaminococcus_intestini     |
| UC-18493  | 1 | 14348 | 14348 | 14348 | 100   | gii218350208 emb CU928145.2 | 5154862 | 14348 | 0.28 | 1   | k__Bacteria;p__Proteobacteria;c__Gammaproteobacteria;o__Enterobacteriales;f__Enterobacteriaceae;g__Escherichia;s__Escherichia_coli      |
| UC-18562  | 1 | 11844 | 11844 | 6929  | 58.5  | gii392322800 gb CP003678.1  | 4968248 | 6958  | 0.14 | 4   | k__Bacteria;p__Proteobacteria;c__Gammaproteobacteria;o__Enterobacteriales;f__Enterobacteriaceae;g__Enterobacter;s__Enterobacter_cloacae |
| UC-18567  | 1 | 16915 | 16915 | 0     | 0     | 0                           | -       | 0     | 0    | 0   | Unknow                                                                                                                                  |
| UC-20182  | 1 | 21022 | 21022 | 10565 | 50.26 | gii365906294 gb CP003218.1  | 5974109 | 11112 | 0.19 | 12  | k__Bacteria;p__Proteobacteria;c__Gammaproteobacteria;o__Enterobacteriales;f__Enterobacteriaceae;g__Klebsiella;a__Klebsiella_oxytoca     |
| UC-20395  | 1 | 12135 | 12135 | 10607 | 87.41 | gii667708115 gb CP006798.1  | 5348284 | 10552 | 0.2  | 7   | k__Bacteria;p__Proteobacteria;c__Gammaproteobacteria;o__Enterobacteriales;f__Enterobacteriaceae;g__Klebsiella;a__Klebsiella_pneumoniae  |
| UC-21146  | 1 | 19413 | 19413 | 14972 | 77.12 | gii527122546 gb CP003025.1  | 1975547 | 15084 | 0.76 | 207 | k__Bacteria;p__Firmicutes;c__Bacilli;o__Lactobacillales;f__Streptococcaceae;g__Streptococcus;s__Streptococcus_lutetiensis               |

|          |   |       |       |       |       |                                 |             |       |      |     |                                                                                                                                           |
|----------|---|-------|-------|-------|-------|---------------------------------|-------------|-------|------|-----|-------------------------------------------------------------------------------------------------------------------------------------------|
| UC-21511 | 1 | 13587 | 13587 | 10245 | 75.4  | gii512154926 gb C<br>P006011.1  | 19477<br>06 | 10216 | 0.52 | 367 | k__Bacteria;p__Firmicutes;c__Bacilli;o__Lactobacillales;f__Lactobacillaceae;g__Lactobacillus;s__Lactobacillus reuteri                     |
| UC-22863 | 1 | 70800 | 70800 | 49612 | 70.07 | gii443901024 emb <br>FO203355.1 | 54196<br>09 | 51432 | 0.95 | 15  | k__Bacteria;p__Proteobacteria;c__Gammaproteobacteria;o__Enterobacteriales;f__Enterobacteriaceae;g__Enterobacter;s__Enterobacter aerogenes |
| UC-23254 | 1 | 12103 | 12103 | 11938 | 98.64 | gii364515570 gb C<br>P003200.1  | 53339<br>42 | 17890 | 0.34 | 7   | k__Bacteria;p__Proteobacteria;c__Gammaproteobacteria;o__Enterobacteriales;f__Enterobacteriaceae;g__Klebsiella;s__Klebsiella pneumoniae    |
| UC-23492 | 1 | 11216 | 11216 | 0     | 0     | 0                               | -           | 0     | 0    | 0   | Unknow                                                                                                                                    |
| UC-23584 | 1 | 24707 | 24707 | 24101 | 97.55 | gii582030173 gb C<br>P006659.1  | 54353<br>69 | 25288 | 0.47 | 7   | k__Bacteria;p__Proteobacteria;c__Gammaproteobacteria;o__Enterobacteriales;f__Enterobacteriaceae;g__Klebsiella;s__Klebsiella pneumoniae    |
| UC-23585 | 1 | 13290 | 13290 | 0     | 0     | 0                               | -           | 0     | 0    | 0   | Unknow                                                                                                                                    |
| UC-24295 | 1 | 16058 | 16058 | 0     | 0     | 0                               | -           | 0     | 0    | 0   | Unknow                                                                                                                                    |
| UC-24626 | 1 | 11138 | 11138 | 10402 | 93.39 | gii365906294 gb C<br>P003218.1  | 59741<br>09 | 10404 | 0.17 | 12  | k__Bacteria;p__Proteobacteria;c__Gammaproteobacteria;o__Enterobacteriales;f__Enterobacteriaceae;g__Klebsiella;s__Klebsiella oxytoca       |

**Supplemental Table S6 The CheckM estimate for MLG > 500 Kpb.**

| MLGid | ContigNum | TotalSize | Marker lineage                  | # genomes | # markers | # marker sets | 0   | 1   | 2   | 3  | 4 | 5+ | Completeness | Contamination | Strain heterogeneity |
|-------|-----------|-----------|---------------------------------|-----------|-----------|---------------|-----|-----|-----|----|---|----|--------------|---------------|----------------------|
| MLG27 | 22        | 2321219   | f__Bifidobacteriaceae (UID1462) | 65        | 476       | 217           | 0   | 472 | 4   | 0  | 0 | 0  | 100          | 1.61          | 100                  |
| MLG43 | 34        | 1824663   | f__Leuconostocaceae (UID486)    | 29        | 443       | 178           | 2   | 426 | 15  | 0  | 0 | 0  | 99.33        | 5.81          | 86.67                |
| MLG35 | 60        | 2176388   | o__Lactobacillales (UID544)     | 293       | 475       | 267           | 5   | 465 | 5   | 0  | 0 | 0  | 98.75        | 1.25          | 60                   |
| MLG29 | 41        | 2264125   | o__Lactobacillales (UID355)     | 490       | 336       | 184           | 3   | 268 | 65  | 0  | 0 | 0  | 98.64        | 21.94         | 100                  |
| MLG4  | 757       | 4965613   | k__Bacteria (UID203)            | 5449      | 104       | 58            | 1   | 28  | 57  | 16 | 2 | 0  | 98.28        | 113.89        | 31.62                |
| MLG28 | 103       | 2284401   | o__Lactobacillales (UID374)     | 471       | 350       | 191           | 7   | 275 | 67  | 1  | 0 | 0  | 97.82        | 22.91         | 98.57                |
| MLG33 | 74        | 2190432   | c__Betaproteobacteria (UID3888) | 323       | 387       | 234           | 9   | 378 | 0   | 0  | 0 | 0  | 97.41        | 0             | 0                    |
| MLG22 | 164       | 2483450   | c__Bacilli (UID285)             | 586       | 319       | 176           | 5   | 314 | 0   | 0  | 0 | 0  | 97.16        | 0             | 0                    |
| MLG15 | 54        | 3265280   | o__Actinomycetales (UID1530)    | 622       | 258       | 152           | 9   | 249 | 0   | 0  | 0 | 0  | 96.71        | 0             | 0                    |
| MLG36 | 74        | 2080848   | o__Lactobacillales (UID374)     | 471       | 350       | 191           | 46  | 302 | 2   | 0  | 0 | 0  | 96.45        | 0.63          | 50                   |
| MLG59 | 37        | 1514318   | f__Leuconostocaceae (UID486)    | 29        | 443       | 178           | 30  | 413 | 0   | 0  | 0 | 0  | 96.3         | 0             | 0                    |
| MLG56 | 137       | 1618295   | o__Lactobacillales (UID544)     | 293       | 475       | 267           | 35  | 402 | 36  | 2  | 0 | 0  | 95.92        | 8.43          | 88.1                 |
| MLG40 | 23        | 1937014   | f__Bifidobacteriaceae (UID1458) | 77        | 464       | 220           | 19  | 438 | 5   | 2  | 0 | 0  | 95.52        | 2.35          | 0                    |
| MLG30 | 41        | 2234142   | p__Actinobacteria (UID2112)     | 31        | 211       | 124           | 13  | 197 | 1   | 0  | 0 | 0  | 95.26        | 0.81          | 100                  |
| MLG13 | 77        | 3341033   | o__Lactobacillales (UID544)     | 293       | 475       | 267           | 22  | 421 | 29  | 3  | 0 | 0  | 95.04        | 7.2           | 18.42                |
| MLG42 | 159       | 1860668   | g__Campylobacter (UID3076)      | 40        | 926       | 174           | 42  | 825 | 56  | 3  | 0 | 0  | 93.62        | 6.34          | 86.15                |
| MLG3  | 161       | 4995154   | f__Enterobacteriaceae (UID5121) | 138       | 1162      | 336           | 118 | 968 | 76  | 0  | 0 | 0  | 93.02        | 6.77          | 82.89                |
| MLG20 | 526       | 2495233   | o__Lactobacillales (UID544)     | 293       | 475       | 267           | 68  | 384 | 19  | 4  | 0 | 0  | 92.31        | 6.72          | 100                  |
| MLG23 | 167       | 2476783   | g__Lactobacillus (UID380)       | 58        | 449       | 129           | 69  | 342 | 38  | 0  | 0 | 0  | 90.27        | 10.17         | 81.58                |
| MLG21 | 236       | 2486742   | o__Lactobacillales (UID544)     | 293       | 475       | 267           | 83  | 303 | 82  | 7  | 0 | 0  | 89.77        | 22.88         | 98.06                |
| MLG12 | 1180      | 3543762   | o__Clostridiales (UID1212)      | 172       | 263       | 149           | 28  | 128 | 88  | 19 | 0 | 0  | 89.32        | 51.95         | 3.45                 |
| MLG10 | 875       | 3711220   | o__Lactobacillales (UID544)     | 293       | 475       | 267           | 83  | 218 | 128 | 39 | 6 | 1  | 89.26        | 56.92         | 24.05                |
| MLG16 | 143       | 2667936   | o__Lactobacillales (UID462)     | 85        | 367       | 162           | 70  | 278 | 17  | 2  | 0 | 0  | 88.82        | 6.48          | 82.61                |
| MLG11 | 370       | 3662098   | k__Bacteria (UID203)            | 5449      | 104       | 58            | 14  | 39  | 37  | 14 | 0 | 0  | 88.56        | 82.29         | 30.38                |
| MLG48 | 200       | 1732615   | o__Lactobacillales (UID543)     | 294       | 469       | 262           | 63  | 397 | 9   | 0  | 0 | 0  | 87.12        | 2.54          | 77.78                |
| MLG41 | 95        | 1878811   | o__Lactobacillales (UID544)     | 293       | 475       | 267           | 93  | 334 | 48  | 0  | 0 | 0  | 86.59        | 10.86         | 89.58                |

|       |      |         |                                 |      |     |     |     |     |     |   |   |   |       |       |       |
|-------|------|---------|---------------------------------|------|-----|-----|-----|-----|-----|---|---|---|-------|-------|-------|
| MLG50 | 331  | 1721485 | o__Lactobacillales (UID374)     | 471  | 350 | 191 | 78  | 262 | 9   | 0 | 1 | 0 | 86.5  | 3.58  | 20    |
| MLG55 | 196  | 1620717 | f__Pasteurellaceae (UID4932)    | 83   | 767 | 440 | 118 | 645 | 4   | 0 | 0 | 0 | 84.92 | 0.91  | 50    |
| MLG37 | 264  | 2074492 | o__Lactobacillales (UID543)     | 294  | 471 | 264 | 70  | 380 | 21  | 0 | 0 | 0 | 83.08 | 4.31  | 85.71 |
| MLG34 | 24   | 2177005 | o__Selenomonadales (UID1024)    | 64   | 334 | 167 | 46  | 287 | 1   | 0 | 0 | 0 | 82.63 | 0.6   | 0     |
| MLG51 | 256  | 1676920 | o__Lactobacillales (UID543)     | 294  | 472 | 265 | 79  | 389 | 4   | 0 | 0 | 0 | 82.45 | 1.26  | 50    |
| MLG46 | 666  | 1777692 | o__Clostridiales (UID1375)      | 50   | 332 | 124 | 72  | 245 | 14  | 1 | 0 | 0 | 82.3  | 7.34  | 88.24 |
| MLG18 | 261  | 2593772 | o__Lactobacillales (UID544)     | 293  | 473 | 265 | 104 | 356 | 13  | 0 | 0 | 0 | 82.28 | 2.91  | 0     |
| MLG14 | 69   | 3302369 | f__Comamonadaceae (UID4119)     | 39   | 693 | 323 | 128 | 554 | 11  | 0 | 0 | 0 | 80.14 | 1.05  | 0     |
| MLG54 | 244  | 1644177 | g__Lactobacillus (UID377)       | 91   | 430 | 154 | 112 | 318 | 0   | 0 | 0 | 0 | 77.82 | 0     | 0     |
| MLG31 | 675  | 2229913 | k__Bacteria (UID203)            | 5449 | 104 | 58  | 52  | 37  | 12  | 3 | 0 | 0 | 76.02 | 23.43 | 61.9  |
| MLG19 | 75   | 2541211 | f__Micrococcaceae (UID1623)     | 39   | 457 | 218 | 88  | 364 | 5   | 0 | 0 | 0 | 74.33 | 1.15  | 0     |
| MLG38 | 227  | 2072184 | f__Bifidobacteriaceae (UID1460) | 70   | 502 | 225 | 131 | 254 | 108 | 9 | 0 | 0 | 74.32 | 28.23 | 31.11 |
| MLG63 | 44   | 1275284 | k__Bacteria (UID203)            | 5449 | 104 | 58  | 51  | 51  | 2   | 0 | 0 | 0 | 74.14 | 3.45  | 100   |
| MLG26 | 139  | 2364650 | k__Bacteria (UID203)            | 5449 | 103 | 57  | 56  | 47  | 0   | 0 | 0 | 0 | 71.93 | 0     | 0     |
| MLG17 | 477  | 2634625 | k__Bacteria (UID203)            | 5449 | 104 | 58  | 56  | 48  | 0   | 0 | 0 | 0 | 68.97 | 0     | 0     |
| MLG61 | 47   | 1331243 | o__Selenomonadales (UID1024)    | 64   | 334 | 167 | 124 | 210 | 0   | 0 | 0 | 0 | 68.26 | 0     | 0     |
| MLG68 | 53   | 1141236 | o__Lactobacillales (UID462)     | 85   | 367 | 162 | 142 | 224 | 1   | 0 | 0 | 0 | 67.16 | 0.12  | 100   |
| MLG32 | 642  | 2218398 | k__Bacteria (UID203)            | 5449 | 104 | 58  | 60  | 42  | 2   | 0 | 0 | 0 | 65.86 | 3.45  | 50    |
| MLG52 | 81   | 1658652 | k__Bacteria (UID203)            | 5449 | 104 | 58  | 58  | 42  | 4   | 0 | 0 | 0 | 65.52 | 5.17  | 75    |
| MLG65 | 70   | 1199191 | o__Lactobacillales (UID355)     | 490  | 336 | 184 | 131 | 136 | 63  | 6 | 0 | 0 | 64.34 | 23.43 | 29.63 |
| MLG47 | 501  | 1733973 | o__Actinomycetales (UID1593)    | 69   | 400 | 198 | 145 | 248 | 7   | 0 | 0 | 0 | 62.29 | 2.01  | 42.86 |
| MLG44 | 294  | 1783400 | f__Comamonadaceae (UID4119)     | 39   | 693 | 323 | 263 | 424 | 6   | 0 | 0 | 0 | 61.42 | 0.83  | 50    |
| MLG53 | 76   | 1656741 | o__Lactobacillales (UID544)     | 293  | 474 | 267 | 210 | 255 | 7   | 2 | 0 | 0 | 58.55 | 2.91  | 30.77 |
| MLG5  | 105  | 4914501 | k__Bacteria (UID203)            | 5449 | 102 | 57  | 62  | 40  | 0   | 0 | 0 | 0 | 56.3  | 0     | 0     |
| MLG74 | 96   | 1059069 | g__Streptococcus (UID684)       | 26   | 668 | 229 | 314 | 348 | 6   | 0 | 0 | 0 | 56.16 | 0.5   | 66.67 |
| MLG9  | 174  | 4215722 | k__Bacteria (UID203)            | 5449 | 104 | 58  | 69  | 35  | 0   | 0 | 0 | 0 | 55.17 | 0     | 0     |
| MLG77 | 19   | 1021675 | o__Selenomonadales (UID1024)    | 64   | 334 | 167 | 141 | 193 | 0   | 0 | 0 | 0 | 52.69 | 0     | 0     |
| MLG39 | 1311 | 1948664 | k__Bacteria (UID203)            | 5449 | 104 | 58  | 68  | 31  | 5   | 0 | 0 | 0 | 52.59 | 7.76  | 100   |
| MLG1  | 1389 | 9438116 | k__Bacteria (UID203)            | 5449 | 103 | 57  | 68  | 20  | 14  | 1 | 0 | 0 | 52.11 | 25.44 | 70.59 |



|        |      |         |                              |      |     |     |     |     |    |    |   |   |       |       |       |
|--------|------|---------|------------------------------|------|-----|-----|-----|-----|----|----|---|---|-------|-------|-------|
| MLG64  | 161  | 1222023 | k__Bacteria (UID203)         | 5449 | 104 | 58  | 69  | 35  | 0  | 0  | 0 | 0 | 51.72 | 0     | 0     |
| MLG6   | 165  | 4910119 | k__Bacteria (UID203)         | 5449 | 104 | 58  | 72  | 30  | 2  | 0  | 0 | 0 | 50    | 3.45  | 50    |
| MLG24  | 297  | 2474294 | k__Bacteria (UID203)         | 5449 | 103 | 57  | 69  | 34  | 0  | 0  | 0 | 0 | 50    | 0     | 0     |
| MLG78  | 106  | 1010880 | p__Actinobacteria (UID2112)  | 31   | 211 | 124 | 120 | 91  | 0  | 0  | 0 | 0 | 47.98 | 0     | 0     |
| MLG108 | 127  | 639830  | k__Bacteria (UID203)         | 5449 | 104 | 58  | 68  | 36  | 0  | 0  | 0 | 0 | 43.73 | 0     | 0     |
| MLG58  | 620  | 1538617 | c__Bacilli (UID285)          | 586  | 325 | 181 | 171 | 121 | 20 | 13 | 0 | 0 | 41.26 | 13.86 | 22.03 |
| MLG97  | 138  | 683941  | k__Bacteria (UID203)         | 5449 | 104 | 58  | 74  | 28  | 2  | 0  | 0 | 0 | 40.63 | 3.45  | 100   |
| MLG66  | 450  | 1157363 | k__Bacteria (UID203)         | 5449 | 104 | 58  | 77  | 26  | 1  | 0  | 0 | 0 | 40.52 | 1.72  | 100   |
| MLG102 | 16   | 629008  | o__Lactobacillales (UID544)  | 293  | 475 | 267 | 300 | 175 | 0  | 0  | 0 | 0 | 39.77 | 0     | 0     |
| MLG101 | 206  | 632622  | k__Bacteria (UID203)         | 5449 | 104 | 58  | 79  | 24  | 1  | 0  | 0 | 0 | 36.55 | 1.72  | 100   |
| MLG76  | 25   | 1027933 | k__Bacteria (UID203)         | 5449 | 103 | 58  | 80  | 23  | 0  | 0  | 0 | 0 | 36.21 | 0     | 0     |
| MLG81  | 555  | 926357  | o__Burkholderiales (UID4000) | 193  | 427 | 214 | 241 | 172 | 14 | 0  | 0 | 0 | 35.46 | 3.68  | 14.29 |
| MLG75  | 519  | 1040289 | k__Bacteria (UID203)         | 5449 | 104 | 58  | 81  | 23  | 0  | 0  | 0 | 0 | 33.62 | 0     | 0     |
| MLG69  | 34   | 1139519 | k__Bacteria (UID203)         | 5449 | 104 | 58  | 81  | 23  | 0  | 0  | 0 | 0 | 33.1  | 0     | 0     |
| MLG62  | 308  | 1319085 | c__Bacilli (UID285)          | 586  | 325 | 181 | 216 | 103 | 6  | 0  | 0 | 0 | 32.8  | 2.58  | 33.33 |
| MLG80  | 41   | 970244  | o__Selenomonadales (UID1024) | 64   | 334 | 167 | 211 | 123 | 0  | 0  | 0 | 0 | 31.14 | 0     | 0     |
| MLG92  | 129  | 715791  | k__Bacteria (UID203)         | 5449 | 104 | 58  | 84  | 20  | 0  | 0  | 0 | 0 | 30.17 | 0     | 0     |
| MLG49  | 180  | 1724937 | k__Bacteria (UID203)         | 5449 | 104 | 58  | 88  | 15  | 1  | 0  | 0 | 0 | 27.59 | 1.72  | 100   |
| MLG94  | 315  | 704704  | k__Bacteria (UID203)         | 5449 | 104 | 58  | 81  | 23  | 0  | 0  | 0 | 0 | 27.35 | 0     | 0     |
| MLG106 | 21   | 552938  | k__Bacteria (UID203)         | 5449 | 104 | 58  | 85  | 19  | 0  | 0  | 0 | 0 | 25.86 | 0     | 0     |
| MLG82  | 434  | 884702  | k__Bacteria (UID203)         | 5449 | 104 | 58  | 77  | 26  | 1  | 0  | 0 | 0 | 25.63 | 0.34  | 0     |
| MLG2   | 2359 | 7707564 | root (UID1)                  | 5656 | 56  | 24  | 50  | 4   | 1  | 1  | 0 | 0 | 25    | 12.5  | 25    |
| MLG73  | 162  | 1065230 | k__Bacteria (UID203)         | 5449 | 104 | 58  | 90  | 14  | 0  | 0  | 0 | 0 | 22.41 | 0     | 0     |
| MLG90  | 116  | 735698  | k__Bacteria (UID203)         | 5449 | 104 | 58  | 89  | 15  | 0  | 0  | 0 | 0 | 20.69 | 0     | 0     |
| MLG93  | 186  | 705157  | k__Bacteria (UID203)         | 5449 | 104 | 58  | 92  | 12  | 0  | 0  | 0 | 0 | 19.83 | 0     | 0     |
| MLG57  | 172  | 1611726 | k__Bacteria (UID203)         | 5449 | 104 | 58  | 89  | 13  | 2  | 0  | 0 | 0 | 18.97 | 1.72  | 100   |
| MLG8   | 990  | 4226704 | root (UID1)                  | 5656 | 56  | 24  | 52  | 3   | 1  | 0  | 0 | 0 | 16.67 | 4.17  | 100   |
| MLG25  | 78   | 2459981 | root (UID1)                  | 5656 | 56  | 24  | 52  | 4   | 0  | 0  | 0 | 0 | 16.67 | 0     | 0     |
| MLG83  | 969  | 861841  | k__Bacteria (UID203)         | 5449 | 103 | 58  | 93  | 9   | 1  | 0  | 0 | 0 | 15.52 | 1.72  | 100   |

|        |      |         |                       |      |     |     |     |    |   |   |   |   |       |      |   |
|--------|------|---------|-----------------------|------|-----|-----|-----|----|---|---|---|---|-------|------|---|
| MLG71  | 171  | 1094424 | k__Bacteria (UID203)  | 5449 | 104 | 58  | 92  | 11 | 1 | 0 | 0 | 0 | 14.81 | 1.72 | 0 |
| MLG104 | 109  | 582462  | k__Bacteria (UID203)  | 5449 | 104 | 58  | 95  | 9  | 0 | 0 | 0 | 0 | 13.79 | 0    | 0 |
| MLG100 | 121  | 661486  | k__Bacteria (UID203)  | 5449 | 104 | 58  | 93  | 11 | 0 | 0 | 0 | 0 | 13.79 | 0    | 0 |
| MLG60  | 56   | 1470060 | k__Bacteria (UID203)  | 5449 | 104 | 58  | 97  | 7  | 0 | 0 | 0 | 0 | 12.07 | 0    | 0 |
| MLG95  | 99   | 697660  | k__Bacteria (UID203)  | 5449 | 104 | 58  | 99  | 5  | 0 | 0 | 0 | 0 | 8.62  | 0    | 0 |
| MLG99  | 46   | 670827  | root (UID1)           | 5656 | 56  | 24  | 54  | 2  | 0 | 0 | 0 | 0 | 8.33  | 0    | 0 |
| MLG98  | 180  | 679117  | root (UID1)           | 5656 | 56  | 24  | 54  | 2  | 0 | 0 | 0 | 0 | 8.33  | 0    | 0 |
| MLG85  | 190  | 816487  | k__Bacteria (UID1453) | 901  | 171 | 117 | 144 | 27 | 0 | 0 | 0 | 0 | 7.78  | 0    | 0 |
| MLG79  | 122  | 990698  | k__Bacteria (UID203)  | 5449 | 104 | 58  | 99  | 5  | 0 | 0 | 0 | 0 | 7.76  | 0    | 0 |
| MLG45  | 220  | 1782103 | k__Bacteria (UID203)  | 5449 | 104 | 58  | 99  | 5  | 0 | 0 | 0 | 0 | 6.03  | 0    | 0 |
| MLG72  | 690  | 1083551 | k__Bacteria (UID203)  | 5449 | 103 | 57  | 96  | 7  | 0 | 0 | 0 | 0 | 5.9   | 0    | 0 |
| MLG88  | 16   | 782047  | root (UID1)           | 5656 | 56  | 24  | 55  | 1  | 0 | 0 | 0 | 0 | 4.17  | 0    | 0 |
| MLG87  | 36   | 806618  | root (UID1)           | 5656 | 56  | 24  | 55  | 1  | 0 | 0 | 0 | 0 | 4.17  | 0    | 0 |
| MLG70  | 312  | 1111766 | root (UID1)           | 5656 | 56  | 24  | 55  | 1  | 0 | 0 | 0 | 0 | 4.17  | 0    | 0 |
| MLG67  | 75   | 1148290 | root (UID1)           | 5656 | 56  | 24  | 55  | 1  | 0 | 0 | 0 | 0 | 4.17  | 0    | 0 |
| MLG105 | 180  | 576136  | root (UID1)           | 5656 | 56  | 24  | 55  | 1  | 0 | 0 | 0 | 0 | 4.17  | 0    | 0 |
| MLG103 | 280  | 622524  | k__Bacteria (UID203)  | 5449 | 104 | 58  | 103 | 1  | 0 | 0 | 0 | 0 | 0.86  | 0    | 0 |
| MLG96  | 14   | 693032  | root (UID1)           | 5656 | 56  | 24  | 56  | 0  | 0 | 0 | 0 | 0 | 0     | 0    | 0 |
| MLG91  | 247  | 730785  | root (UID1)           | 5656 | 56  | 24  | 56  | 0  | 0 | 0 | 0 | 0 | 0     | 0    | 0 |
| MLG89  | 131  | 761333  | root (UID1)           | 5656 | 56  | 24  | 56  | 0  | 0 | 0 | 0 | 0 | 0     | 0    | 0 |
| MLG86  | 282  | 809037  | root (UID1)           | 5656 | 56  | 24  | 56  | 0  | 0 | 0 | 0 | 0 | 0     | 0    | 0 |
| MLG84  | 496  | 841665  | root (UID1)           | 5656 | 56  | 24  | 56  | 0  | 0 | 0 | 0 | 0 | 0     | 0    | 0 |
| MLG7   | 5889 | 4294619 | root (UID1)           | 5656 | 56  | 24  | 56  | 0  | 0 | 0 | 0 | 0 | 0     | 0    | 0 |

**Supplemental Table S9:** the OOB classification error rates of the 1000 genes (Figure 3 and Supplementary Table S8).

| Class | S1    | S2    | S3    | S4    | Class error (%) |
|-------|-------|-------|-------|-------|-----------------|
| S1    | 86.07 | 10.21 | 1.74  | 1.98  | 13.93           |
| S2    | 36.53 | 32.16 | 15.79 | 15.53 | 67.84           |
| S3    | 13.44 | 7.45  | 39.32 | 39.79 | 60.68           |
| S4    | 3.9   | 7.79  | 43.03 | 45.28 | 54.72           |

Note: OOB estimate of error rate: 49.29%.

Supplemental Table S12: the CAZy annotation of microbiome of S3/4 giant pandas and other mammals.

|                   |           | GH2<br>3         | CB<br>M50        | GH2<br>8     | CB<br>M48    | GH2<br>6     | GH1<br>3     | GH4          | GH5<br>1     | GH3<br>5     | GH1<br>02    | GH2<br>4     | GH9          | AA6          | GH3<br>7     | AA1          | GH5          | GH3<br>0     | AA3          | CB<br>M5     | GH8          | CB<br>M34    | GH8<br>0     | GH4<br>7     | GH6<br>3     | GH1<br>9     | GH1          | GH8          | GH3<br>8     | GH3<br>1     |
|-------------------|-----------|------------------|------------------|--------------|--------------|--------------|--------------|--------------|--------------|--------------|--------------|--------------|--------------|--------------|--------------|--------------|--------------|--------------|--------------|--------------|--------------|--------------|--------------|--------------|--------------|--------------|--------------|--------------|--------------|--------------|
| Armadillo         | carnivore | 0.00<br>100<br>9 | 0.00<br>055<br>7 | 0.00<br>0418 | 0.00<br>1148 | 3.48<br>E-05 | 0.00<br>2471 | 0.00<br>0209 | 0.00<br>087  | 0.00<br>1496 | 0            | 6.96<br>E-05 | 0.00<br>0104 | 0            | 0            | 3.48<br>E-05 | 0.00<br>0452 | 0.00<br>0139 | 0            | 3.48<br>E-05 | 0            | 0.00<br>0418 | 0            | 0            | 0            | 0            | 0.00<br>0905 | 3.48<br>E-05 | 0.00<br>0418 | 0.00<br>1462 |
| BelugaWhale       | carnivore | 4.80<br>E-05     | 3.34<br>E-05     | 3.55<br>E-05 | 5.43<br>E-05 | 4.18<br>E-06 | 1.04<br>E-05 | 8.35<br>E-06 | 5.85<br>E-05 | 8.35<br>E-06 | 1.67<br>E-05 | 0            | 0            | 6.26<br>E-06 | 4.18<br>E-06 | 2.71<br>E-05 | 1.04<br>E-05 | 1.67<br>E-05 | 1.04<br>E-05 | 1.04<br>E-05 | 0            | 0            | 0            | 1.88<br>E-05 | 4.18<br>E-06 | 6.26<br>E-06 | 0            | 8.35<br>E-05 | 1.88<br>E-05 | 2.09<br>E-05 |
| BottlenoseDolphin | carnivore | 9.87<br>E-07     | 4.93<br>E-06     | 0            | 6.91<br>E-06 | 0            | 5.92<br>E-06 | 0            | 4.93<br>E-06 | 1.18<br>E-05 | 0            | 0            | 0            | 2.96<br>E-06 | 0            | 0            | 0            | 6.91<br>E-06 | 0            | 1.97<br>E-06 | 0            | 9.87<br>E-07 | 0            | 5.92<br>E-06 | 0            | 0            | 3.95<br>E-06 | 4.93<br>E-06 | 0            | 2.07<br>E-05 |
| BushDog           | carnivore | 0.00<br>052<br>6 | 0.00<br>068<br>1 | 0.00<br>0541 | 0.00<br>116  | 9.28<br>E-05 | 0.00<br>2181 | 0.00<br>0186 | 0.00<br>0696 | 0.00<br>0975 | 1.55<br>E-05 | 1.55<br>E-05 | 3.09<br>E-05 | 0            | 0            | 0.00<br>0449 | 9.28<br>E-05 | 0            | 0            | 0            | 1.55<br>E-05 | 0.00<br>034  | 0            | 0            | 0.00<br>0325 | 0            | 0.00<br>0588 | 0.00<br>017  | 0.00<br>0387 | 0.00<br>0387 |
| Coyote            | carnivore | 0.00<br>042<br>8 | 0.00<br>036<br>9 | 0.00<br>0164 | 0.00<br>0253 | 6.57<br>E-05 | 0.00<br>0642 | 9.50<br>E-05 | 0.00<br>0275 | 0.00<br>0269 | 9.96<br>E-06 | 4.25<br>E-05 | 0.00<br>0149 | 1.99<br>E-06 | 1.99<br>E-06 | 1.33<br>E-06 | 0.00<br>0103 | 0.00<br>0104 | 6.64<br>E-07 | 1.46<br>E-05 | 1.99<br>E-06 | 0.00<br>01   | 0            | 8.63<br>E-06 | 9.56<br>E-05 | 8.63<br>E-06 | 0.00<br>0284 | 5.45<br>E-05 | 9.16<br>E-05 | 0.00<br>0212 |
| Echidna           | carnivore | 0.00<br>107<br>3 | 0.00<br>114<br>9 | 0.00<br>023  | 0.00<br>0536 | 0.00<br>0138 | 0.00<br>2206 | 0.00<br>0169 | 0.00<br>1777 | 0.00<br>0444 | 7.66<br>E-05 | 1.53<br>E-05 | 3.06<br>E-05 | 0            | 0            | 7.66<br>E-05 | 0.00<br>023  | 0.00<br>0337 | 3.06<br>E-05 | 9.19<br>E-05 | 7.66<br>E-05 | 0.00<br>0306 | 0            | 3.06<br>E-05 | 0            | 0.00<br>2697 | 0.00<br>0444 | 0.00<br>0245 | 0.00<br>0598 |              |
| Fisher            | carnivore | 0.00<br>056<br>4 | 0.00<br>053<br>8 | 0.00<br>0253 | 0.00<br>0708 | 0.00<br>0177 | 0.00<br>153  | 0.00<br>0409 | 0.00<br>0464 | 0.00<br>0756 | 4.05<br>E-06 | 0.00<br>0221 | 5.03<br>E-05 | 0            | 3.24<br>E-06 | 7.30<br>E-06 | 0.00<br>0447 | 4.13<br>E-05 | 1.62<br>E-06 | 7.62<br>E-05 | 4.86<br>E-06 | 0.00<br>0202 | 0            | 1.30<br>E-05 | 0.00<br>0186 | 1.86<br>E-05 | 0.00<br>1179 | 0.00<br>0169 | 0.00<br>0558 | 0.00<br>0486 |
| HumpbackWhale     | carnivore | 0.00<br>034<br>4 | 0.00<br>070<br>4 | 0.00<br>0256 | 0.00<br>0524 | 0.00<br>0194 | 0.00<br>1322 | 6.20<br>E-05 | 0.00<br>0562 | 0.00<br>0865 | 7.87<br>E-06 | 4.03<br>E-05 | 4.13<br>E-05 | 0            | 0            | 5.90<br>E-06 | 0.00<br>0346 | 0.00<br>0137 | 0            | 0.00<br>0103 | 0            | 0.00<br>0116 | 1.97<br>E-06 | 4.62<br>E-05 | 0.00<br>0126 | 1.48<br>E-05 | 0.00<br>0107 | 7.18<br>E-05 | 0.00<br>0256 | 0.00<br>049  |
| Hyena             | carnivore | 0.00<br>046<br>2 | 0.00<br>105<br>2 | 0.00<br>0511 | 0.00<br>0891 | 0.00<br>0117 | 0.00<br>1651 | 0.00<br>0278 | 0.00<br>0862 | 0.00<br>0818 | 0            | 5.84<br>E-05 | 4.38<br>E-05 | 0            | 0            | 4.38<br>E-05 | 0.00<br>038  | 7.30<br>E-05 | 0            | 2.92<br>E-05 | 4.38<br>E-05 | 0.00<br>0161 | 0            | 0            | 0.00<br>0146 | 0            | 0.00<br>019  | 8.76<br>E-05 | 0.00<br>0248 | 0.00<br>0394 |
| Lion1             | carnivore | 0.00<br>063<br>2 | 0.00<br>062<br>3 | 0.00<br>0351 | 0.00<br>1194 | 0.00<br>014  | 0.00<br>1897 | 0.00<br>0211 | 0.00<br>0983 | 0.00<br>0702 | 0            | 0.00<br>0211 | 0            | 0            | 0            | 7.02<br>E-05 | 0.00<br>0211 | 7.02<br>E-05 | 0            | 0            | 0            | 0.00<br>0351 | 0            | 7.02<br>E-05 | 0            | 0            | 0.00<br>1897 | 0.00<br>0702 | 0.00<br>0562 | 0.00<br>0843 |
| Lion2             | carnivore | 0.00<br>1        | 0.00<br>144      | 0.00<br>0547 | 0.00<br>0867 | 0.00<br>0147 | 0.00<br>2133 | 0.00<br>0533 | 0.00<br>1346 | 0.00<br>152  | 9.33<br>E-05 | 0.00<br>028  | 0.00<br>0253 | 4.00<br>E-05 | 0.00<br>0187 | 0.00<br>0213 | 0.00<br>0387 | 0.00<br>02   | 0.00<br>012  | 6.67<br>E-05 | 0.00<br>0133 | 6.67<br>E-05 | 2.67<br>E-05 | 0.00<br>0307 | 4.00<br>E-05 | 0.00<br>12   | 0.00<br>0253 | 0.00<br>0427 | 0.00<br>0827 |              |
| PolarBear         | carnivore | 0.00<br>141<br>9 | 0.00<br>191<br>6 | 0.00<br>0479 | 0.00<br>0798 | 0.00<br>016  | 0.00<br>2359 | 0.00<br>1011 | 0.00<br>2164 | 0.00<br>1454 | 0.00<br>0266 | 0.00<br>0319 | 0.00<br>0692 | 0.00<br>0142 | 0.00<br>0372 | 0.00<br>0266 | 0.00<br>0426 | 0.00<br>0514 | 0.00<br>0319 | 0.00<br>0922 | 0.00<br>0443 | 0.00<br>0408 | 0.00<br>0266 | 5.32<br>E-05 | 0.00<br>0568 | 0.00<br>0213 | 0.00<br>1153 | 0.00<br>0195 | 0.00<br>0674 | 0.00<br>0709 |
| RightWhaleF11     | carnivore | 0.00<br>028<br>1 | 0.00<br>069<br>1 | 0.00<br>0268 | 0.00<br>0565 | 0.00<br>0186 | 0.00<br>1139 | 0.00<br>017  | 0.00<br>0498 | 0.00<br>0755 | 0            | 8.78<br>E-05 | 2.35<br>E-05 | 0            | 0            | 0.00<br>0426 | 8.23<br>E-05 | 0.00<br>0129 | 0            | 0.00<br>0173 | 0            | 0.00<br>0173 | 0            | 1.63<br>E-05 | 0.00<br>0112 | 2.44<br>E-05 | 0.00<br>0139 | 7.33<br>E-05 | 0.00<br>0296 | 0.00<br>0307 |
| RightWhaleF16     | carnivore | 0.00<br>031<br>1 | 0.00<br>069<br>7 | 0.00<br>0267 | 0.00<br>0486 | 0.00<br>0115 | 0.00<br>1322 | 5.19<br>E-05 | 0.00<br>0579 | 0.00<br>0789 | 6.49<br>E-06 | 1.25<br>E-05 | 7.53<br>E-05 | 0            | 0            | 8.65<br>E-07 | 0.00<br>0355 | 0.00<br>0141 | 0            | 8.91<br>E-05 | 8.65<br>E-07 | 0.00<br>0106 | 0            | 3.98<br>E-05 | 0.00<br>013  | 1.90<br>E-05 | 8.22<br>E-05 | 6.32<br>E-05 | 0.00<br>0225 | 0.00<br>0414 |
| RightWhaleF9      | carnivore | 0.00<br>036<br>4 | 0.00<br>125<br>8 | 0.00<br>0326 | 0.00<br>0459 | 0.00<br>0109 | 0.00<br>1445 | 0.00<br>0141 | 0.00<br>055  | 0.00<br>0799 | 8.17<br>E-06 | 1.63<br>E-05 | 6.44<br>E-05 | 2.04<br>E-06 | 0            | 2.04<br>E-06 | 0.00<br>0343 | 0.00<br>0157 | 0            | 0.00<br>0108 | 0            | 8.58<br>E-05 | 0            | 5.42<br>E-05 | 0.00<br>012  | 1.74<br>E-05 | 9.20<br>E-05 | 7.56<br>E-05 | 0.00<br>0276 | 0.00<br>0455 |
| Gorilla           | herbivore | 0.00<br>032<br>1 | 0.00<br>096<br>3 | 0.00<br>0201 | 0.00<br>0562 | 8.02<br>E-05 | 0.00<br>1203 | 0            | 0.00<br>0562 | 0.00<br>0762 | 0            | 0            | 4.01<br>E-05 | 0            | 0            | 0.00<br>0481 | 4.01<br>E-05 | 0            | 4.01<br>E-05 | 4.01<br>E-05 | 0.00<br>012  | 0            | 0            | 4.01<br>E-05 | 4.01<br>E-05 | 0.00<br>0281 | 0.00<br>012  | 8.02<br>E-05 | 0.00<br>0361 |              |
| AfricanElephant   | herbivore | 0.00<br>019<br>2 | 0.00<br>041<br>9 | 0.00<br>0206 | 0.00<br>0199 | 7.81<br>E-05 | 0.00<br>0724 | 0.00<br>0121 | 0.00<br>0369 | 0.00<br>0405 | 7.10<br>E-06 | 2.84<br>E-05 | 7.81<br>E-05 | 0            | 0            | 0.00<br>0206 | 0.00<br>0121 | 0            | 0            | 7.81<br>E-05 | 3.55<br>E-05 | 0            | 0            | 2.84<br>E-05 | 7.10<br>E-06 | 6.39<br>E-05 | 1.42<br>E-05 | 8.52<br>E-05 | 0.00<br>0412 |              |
| BigHornsheepSD    | herbivore | 0.00<br>050<br>4 | 0.00<br>118<br>2 | 0.00<br>0263 | 0.00<br>0898 | 0.00<br>0197 | 0.00<br>0372 | 0.00<br>0504 | 0.00<br>1182 | 0            | 8.76<br>E-05 | 4.38<br>E-05 | 0            | 0            | 0            | 0.00<br>0394 | 4.38<br>E-05 | 0            | 2.19<br>E-05 | 2.19<br>E-05 | 0.00<br>0131 | 0            | 0            | 0            | 0            | 0.00<br>0175 | 8.76<br>E-05 | 0.00<br>0306 | 0.00<br>0547 |              |
| BigHornsheepW3    | herbivore | 0.00<br>032<br>8 | 0.00<br>125<br>3 | 0.00<br>0308 | 0.00<br>0675 | 0.00<br>0116 | 0.00<br>1966 | 0.00<br>0463 | 0.00<br>0655 | 0.00<br>1118 | 1.93<br>E-05 | 1.93<br>E-05 | 0.00<br>0116 | 0            | 0            | 0.00<br>0405 | 0.00<br>0116 | 1.93<br>E-05 | 1.93<br>E-05 | 1.93<br>E-05 | 0.00<br>0212 | 0            | 0            | 0            | 1.93<br>E-05 | 0.00<br>0173 | 0.00<br>0703 | 0.00<br>0559 | 0.00<br>0578 |              |
| BlackRhinoceros   | herbivore | 0.00<br>040<br>2 | 0.00<br>067<br>7 | 0.00<br>0254 | 0.00<br>0434 | 0.00<br>0106 | 0.00<br>128  | 0.00<br>0106 | 0.00<br>0529 | 0.00<br>0931 | 1.06<br>E-05 | 3.17<br>E-05 | 0.00<br>0169 | 0            | 1.06<br>E-05 | 0            | 0.00<br>0338 | 0.00<br>0148 | 0            | 1.06<br>E-05 | 5.29<br>E-05 | 0.00<br>0106 | 0            | 0            | 1.06<br>E-05 | 0.00<br>0212 | 7.40<br>E-05 | 0.00<br>0106 | 0.00<br>0677 |              |
| Capybara          | herbivore | 0.00<br>050<br>3 | 0.00<br>084<br>7 | 0.00<br>027  | 0.00<br>0577 | 0.00<br>0102 | 0.00<br>187  | 0.00<br>0121 | 0.00<br>0698 | 0.00<br>094  | 0            | 8.38<br>E-05 | 5.58<br>E-05 | 0            | 0            | 1.86<br>E-05 | 0.00<br>0456 | 0.00<br>0177 | 0            | 2.79<br>E-05 | 5.58<br>E-05 | 0.00<br>0121 | 0            | 0            | 1.86<br>E-05 | 0.00<br>0707 | 1.86<br>E-05 | 0.00<br>0112 | 0.00<br>0996 |              |
| ColobusMonkey     | herbivore | 0.00<br>053<br>2 | 0.00<br>102      | 0.00<br>0163 | 0.00<br>0592 | 0.00<br>0163 | 0.00<br>1449 | 0.00<br>0163 | 0.00<br>0621 | 0.00<br>0828 | 1.48<br>E-05 | 0.00<br>0118 | 4.44<br>E-05 | 0            | 1.48<br>E-05 | 0            | 0.00<br>0503 | 0.00<br>0148 | 0            | 1.48<br>E-05 | 5.92<br>E-05 | 0.00<br>0177 | 0            | 0            | 4.44<br>E-05 | 0.00<br>0148 | 0.00<br>0118 | 0.00<br>0311 | 0.00<br>0799 |              |
| Gazelle           | herbivore | 0.00<br>038<br>1 | 0.00<br>083<br>5 | 0.00<br>0234 | 0.00<br>0659 | 7.32<br>E-05 | 0.00<br>1743 | 0.00<br>0146 | 0.00<br>0615 | 0.00<br>0806 | 5.86<br>E-05 | 0            | 1.46<br>E-05 | 0            | 1.46<br>E-05 | 0            | 0.00<br>0264 | 8.79<br>E-05 | 1.46<br>E-05 | 5.86<br>E-05 | 1.46<br>E-05 | 0.00<br>0234 | 0            | 0            | 8.79<br>E-05 | 0            | 0.00<br>0132 | 4.39<br>E-05 | 0.00<br>0249 | 0.00<br>0659 |

|                |           |                  |                  |              |              |              |              |              |              |              |              |              |              |              |              |              |              |              |              |              |              |              |              |              |              |              |              |              |              |              |
|----------------|-----------|------------------|------------------|--------------|--------------|--------------|--------------|--------------|--------------|--------------|--------------|--------------|--------------|--------------|--------------|--------------|--------------|--------------|--------------|--------------|--------------|--------------|--------------|--------------|--------------|--------------|--------------|--------------|--------------|--------------|
| Giraffe        | herbivore | 0.00<br>027<br>9 | 0.00<br>072<br>7 | 0.00<br>0279 | 0.00<br>0596 | 3.73<br>E-05 | 0.00<br>1491 | 0.00<br>0317 | 0.00<br>0503 | 0.00<br>0969 | 1.86<br>E-05 | 9.32<br>E-05 | 5.59<br>E-05 | 0            | 0            | 0            | 0.00<br>0279 | 7.45<br>E-05 | 1.86<br>E-05 | 0            | 5.59<br>E-05 | 0.00<br>0242 | 0            | 0            | 7.45<br>E-05 | 0            | 0.00<br>0149 | 1.86<br>E-05 | 0.00<br>0186 | 0.00<br>0689 |
| Horse          | herbivore | 0.00<br>031<br>4 | 0.00<br>071<br>9 | 0.00<br>0213 | 0.00<br>0344 | 0.00<br>0121 | 0.00<br>1144 | 0.00<br>0202 | 0.00<br>0739 | 0.00<br>0749 | 3.04<br>E-05 | 2.02<br>E-05 | 4.05<br>E-05 | 0            | 0            | 0            | 0.00<br>0243 | 0.00<br>0213 | 0            | 2.02<br>E-05 | 0.00<br>0142 | 0.00<br>0162 | 0            | 1.01<br>E-05 | 0.00<br>0101 | 0            | 8.10<br>E-05 | 0.00<br>0111 | 0.00<br>0223 | 0.00<br>085  |
| Horse2         | herbivore | 0.00<br>023<br>8 | 0.00<br>075<br>9 | 0.00<br>0239 | 0.00<br>0412 | 0.00<br>0132 | 0.00<br>0972 | 0.00<br>0171 | 0.00<br>0592 | 0.00<br>064  | 2.95<br>E-05 | 3.48<br>E-05 | 2.41<br>E-05 | 1.43<br>E-05 | 9.83<br>E-06 | 1.07<br>E-05 | 0.00<br>0339 | 0.00<br>0119 | 3.31<br>E-05 | 2.77<br>E-05 | 3.13<br>E-05 | 0.00<br>0122 | 1.79<br>E-06 | 8.04<br>E-06 | 3.84<br>E-05 | 1.16<br>E-05 | 0.00<br>0207 | 5.27<br>E-05 | 0.00<br>0155 | 0.00<br>041  |
| HyraxSD        | herbivore | 0.00<br>054<br>6 | 0.00<br>104<br>4 | 0.00<br>019  | 0.00<br>0403 | 7.12<br>E-05 | 0.00<br>1329 | 4.75<br>E-05 | 0.00<br>0664 | 0.00<br>0854 | 2.37<br>E-05 | 7.12<br>E-05 | 0.00<br>0261 | 0            | 0            | 0            | 0.00<br>019  | 0.00<br>0142 | 0            | 2.37<br>E-05 | 9.49<br>E-05 | 9.49<br>E-05 | 0            | 0            | 2.37<br>E-05 | 0.00<br>0214 | 9.49<br>E-05 | 0.00<br>0261 | 0.00<br>0664 |              |
| HyraxSTL       | herbivore | 0.00<br>051<br>4 | 0.00<br>107<br>4 | 0.00<br>0242 | 0.00<br>0605 | 0.00<br>0136 | 0.00<br>177  | 0.00<br>0166 | 0.00<br>0756 | 0.00<br>0666 | 3.03<br>E-05 | 0.00<br>0121 | 0.00<br>0136 | 0            | 0            | 1.51<br>E-05 | 0.00<br>0197 | 0.00<br>0197 | 0            | 1.51<br>E-05 | 7.56<br>E-05 | 0.00<br>0166 | 0            | 1.51<br>E-05 | 6.05<br>E-05 | 0            | 0.00<br>0348 | 6.05<br>E-05 | 0.00<br>0242 | 0.00<br>1225 |
| Kroo3          | herbivore | 0.00<br>027<br>2 | 0.00<br>108<br>8 | 0.00<br>0363 | 0.00<br>0408 | 0.00<br>0136 | 0.00<br>1723 | 0.00<br>0227 | 0.00<br>0499 | 0.00<br>059  | 4.54<br>E-05 | 9.07<br>E-05 | 9.07<br>E-05 | 0            | 0            | 0            | 0.00<br>0408 | 0.00<br>0136 | 0            | 0            | 0            | 0.00<br>0136 | 0            | 0            | 9.07<br>E-05 | 0            | 4.54<br>E-05 | 0            | 0.00<br>0181 | 0.00<br>0317 |
| Okapi1         | herbivore | 0.00<br>033<br>5 | 0.00<br>091<br>5 | 0.00<br>0366 | 0.00<br>0762 | 9.15<br>E-05 | 0.00<br>192  | 0.00<br>0152 | 0.00<br>0671 | 0.00<br>1006 | 3.05<br>E-05 | 6.10<br>E-05 | 0            | 0            | 0            | 0.00<br>0366 | 9.15<br>E-05 | 3.05<br>E-05 | 0            | 0            | 0.00<br>0335 | 0            | 0            | 0            | 0            | 3.05<br>E-05 | 0.00<br>0305 | 0.00<br>0152 | 0.00<br>0335 | 0.00<br>0671 |
| Okapi2         | herbivore | 0.00<br>039<br>8 | 0.00<br>123<br>8 | 0.00<br>0354 | 0.00<br>0619 | 4.42<br>E-05 | 0.00<br>2034 | 0.00<br>0265 | 0.00<br>0442 | 0.00<br>1105 | 0            | 0.00<br>0177 | 0.00<br>0133 | 0            | 0            | 0            | 0.00<br>0265 | 8.84<br>E-05 | 0            | 0            | 0.00<br>0177 | 0.00<br>031  | 0            | 4.42<br>E-05 | 4.42<br>E-05 | 0            | 0.00<br>0177 | 4.42<br>E-05 | 0.00<br>0133 | 0.00<br>0663 |
| Orang1         | herbivore | 0.00<br>041<br>1 | 0.00<br>071<br>9 | 0.00<br>0308 | 0.00<br>0616 | 3.42<br>E-05 | 0.00<br>1266 | 0.00<br>0137 | 0.00<br>0684 | 0.00<br>089  | 0            | 0            | 0.00<br>0103 | 0            | 0            | 0            | 0.00<br>024  | 0.00<br>0103 | 0            | 3.42<br>E-05 | 3.42<br>E-05 | 0.00<br>0103 | 0            | 0            | 3.42<br>E-05 | 0            | 0.00<br>0376 | 0.00<br>0103 | 0.00<br>0103 | 0.00<br>0308 |
| Pig            | herbivore | 0.00<br>054<br>1 | 0.00<br>138<br>6 | 0.00<br>022  | 0.00<br>0355 | 0.00<br>0169 | 0.00<br>1927 | 5.07<br>E-05 | 0.00<br>0828 | 0.00<br>0727 | 3.38<br>E-05 | 8.45<br>E-05 | 5.07<br>E-05 | 0            | 3.38<br>E-05 | 0            | 0.00<br>0338 | 0.00<br>0135 | 0            | 1.69<br>E-05 | 8.45<br>E-05 | 0.00<br>0237 | 0            | 0            | 0.00<br>0101 | 0.00<br>0152 | 0.00<br>0169 | 0.00<br>0135 | 0.00<br>0135 | 0.00<br>1217 |
| Rabbit1        | herbivore | 0.00<br>030<br>4 | 0.00<br>083<br>9 | 0.00<br>0289 | 0.00<br>1216 | 0.00<br>026  | 0.00<br>2127 | 0.00<br>0145 | 0.00<br>0651 | 0.00<br>1244 | 1.45<br>E-05 | 4.34<br>E-05 | 0.00<br>013  | 0            | 0            | 0            | 0.00<br>0463 | 8.68<br>E-05 | 0            | 1.45<br>E-05 | 7.24<br>E-05 | 0.00<br>0333 | 0            | 1.45<br>E-05 | 2.89<br>E-05 | 0            | 0.00<br>026  | 0.00<br>0116 | 0.00<br>0174 | 0.00<br>0724 |
| Rabbit2        | herbivore | 0.00<br>034<br>1 | 0.00<br>085<br>1 | 0.00<br>0345 | 0.00<br>0949 | 0.00<br>0227 | 0.00<br>1717 | 0.00<br>0117 | 0.00<br>0527 | 0.00<br>1072 | 1.38<br>E-05 | 9.20<br>E-05 | 5.58<br>E-05 | 2.17<br>E-06 | 1.45<br>E-06 | 2.90<br>E-06 | 0.00<br>0425 | 5.73<br>E-05 | 0            | 1.01<br>E-05 | 8.99<br>E-05 | 0.00<br>0228 | 0            | 2.17<br>E-05 | 2.83<br>E-05 | 2.90<br>E-06 | 0.00<br>0303 | 0.00<br>012  | 6.67<br>E-05 | 0.00<br>0607 |
| Springbok      | herbivore | 0.00<br>059<br>3 | 0.00<br>141<br>3 | 0.00<br>0266 | 0.00<br>0633 | 0.00<br>0102 | 0.00<br>2044 | 0.00<br>0266 | 0.00<br>096  | 0.00<br>0695 | 0            | 2.04<br>E-05 | 8.17<br>E-05 | 0            | 2.04<br>E-05 | 0            | 0.00<br>0204 | 0.00<br>0123 | 0            | 0.00<br>0123 | 4.09<br>E-05 | 0.00<br>0184 | 0            | 0            | 4.09<br>E-05 | 2.04<br>E-05 | 0.00<br>0163 | 0.00<br>0123 | 0.00<br>049  |              |
| Urial          | herbivore | 0.00<br>021<br>9 | 0.00<br>066<br>6 | 0.00<br>0406 | 0.00<br>0656 | 0.00<br>0188 | 0.00<br>2094 | 0.00<br>0281 | 0.00<br>0344 | 0.00<br>075  | 0            | 6.25<br>E-05 | 0            | 0            | 0            | 0            | 0.00<br>0375 | 9.38<br>E-05 | 0            | 3.13<br>E-05 | 0            | 0.00<br>0156 | 0            | 3.13<br>E-05 | 3.13<br>E-05 | 3.13<br>E-05 | 0.00<br>0438 | 6.25<br>E-05 | 0.00<br>025  | 0.00<br>0844 |
| Whitetail Deer | herbivore | 0.00<br>039<br>5 | 0.00<br>081<br>9 | 0.00<br>0296 | 0.00<br>0706 | 0.00<br>0105 | 0.00<br>1459 | 0.00<br>0185 | 0.00<br>065  | 0.00<br>0699 | 6.02<br>E-05 | 4.20<br>E-05 | 0.00<br>0123 | 2.38<br>E-05 | 1.27<br>E-05 | 9.59<br>E-05 | 0.00<br>03   | 0.00<br>0125 | 0.00<br>0128 | 1.51<br>E-05 | 4.75<br>E-05 | 0.00<br>0141 | 5.55<br>E-06 | 3.64<br>E-05 | 3.17<br>E-05 | 6.50<br>E-05 | 0.00<br>0357 | 0.00<br>0104 | 0.00<br>0178 | 0.00<br>0348 |
| ZebraSTL1      | herbivore | 0.00<br>023<br>4 | 0.00<br>066<br>2 | 0.00<br>0389 | 0.00<br>035  | 3.89<br>E-05 | 0.00<br>1051 | 0.00<br>0117 | 0.00<br>0428 | 0.00<br>0973 | 0            | 0            | 7.78<br>E-05 | 0            | 0            | 0            | 0.00<br>0272 | 0.00<br>0195 | 0            | 0            | 0.00<br>0234 | 7.78<br>E-05 | 0            | 0            | 0            | 3.89<br>E-05 | 0.00<br>0311 | 0.00<br>0195 | 0.00<br>0117 | 0.00<br>0467 |
| BaboonSTL      | omnivore  | 0.00<br>044<br>4 | 0.00<br>143<br>4 | 0.00<br>0344 | 0.00<br>0555 | 5.74<br>E-05 | 0.00<br>1606 | 0.00<br>0153 | 0.00<br>065  | 0.00<br>0918 | 0            | 7.65<br>E-05 | 3.82<br>E-05 | 0            | 0            | 0            | 0.00<br>0306 | 0.00<br>0153 | 0            | 1.91<br>E-05 | 1.91<br>E-05 | 0.00<br>0134 | 0            | 0            | 5.74<br>E-05 | 3.82<br>E-05 | 0.00<br>0115 | 5.74<br>E-05 | 0.00<br>021  | 0.00<br>0287 |
| BaboonW        | omnivore  | 0.00<br>041<br>4 | 0.00<br>060<br>5 | 0.00<br>0382 | 0.00<br>0955 | 9.55<br>E-05 | 0.00<br>1877 | 0.00<br>0127 | 0.00<br>0445 | 0.00<br>1082 | 0            | 3.18<br>E-05 | 0            | 0            | 3.18<br>E-05 | 0            | 0.00<br>0414 | 0.00<br>0191 | 0            | 6.36<br>E-05 | 0            | 0.00<br>0255 | 0            | 0            | 3.18<br>E-05 | 3.18<br>E-05 | 0.00<br>0159 | 0.00<br>0159 | 0.00<br>0318 | 0.00<br>0605 |
| BlackBear      | omnivore  | 0.00<br>114<br>7 | 0.00<br>119<br>9 | 0.00<br>0595 | 0.00<br>1829 | 0.00<br>0145 | 0.00<br>2323 | 0.00<br>0508 | 0.00<br>4399 | 0.00<br>1248 | 8.71<br>E-05 | 0.00<br>0116 | 0.00<br>0319 | 2.90<br>E-05 | 0.00<br>0189 | 8.71<br>E-05 | 0.00<br>0116 | 0.00<br>0131 | 0.00<br>0145 | 5.81<br>E-05 | 5.81<br>E-05 | 8.71<br>E-05 | 7.26<br>E-05 | 1.45<br>E-05 | 0.00<br>0102 | 1.45<br>E-05 | 0.00<br>4384 | 0.00<br>0189 | 0.00<br>0276 | 0.00<br>0392 |
| BlackLemur     | omnivore  | 0.00<br>064<br>7 | 0.00<br>056<br>6 | 0.00<br>062  | 0.00<br>1536 | 0.00<br>0108 | 0.00<br>458  | 2.69<br>E-05 | 0.00<br>1751 | 0.00<br>0889 | 5.39<br>E-05 | 0.00<br>0216 | 0.00<br>0135 | 0            | 0            | 0            | 0.00<br>0431 | 0.00<br>0108 | 0            | 0            | 0.00<br>0108 | 8.08<br>E-05 | 0            | 0            | 0            | 2.69<br>E-05 | 0.00<br>1239 | 0.00<br>0189 | 0.00<br>0108 | 0.00<br>1185 |
| Chimpanzee1    | omnivore  | 0.00<br>039<br>4 | 0.00<br>081<br>9 | 0.00<br>0424 | 0.00<br>0637 | 0.00<br>0167 | 0.00<br>1774 | 0.00<br>0152 | 0.00<br>0819 | 0.00<br>1    | 1.52<br>E-05 | 6.06<br>E-05 | 0.00<br>0136 | 0            | 0            | 0            | 0.00<br>0349 | 0.00<br>0106 | 0            | 3.03<br>E-05 | 3.03<br>E-05 | 0.00<br>0167 | 0            | 0            | 3.03<br>E-05 | 0            | 0.00<br>0485 | 0.00<br>0106 | 0.00<br>0152 | 0.00<br>0652 |
| Chimpanzee2    | omnivore  | 0.00<br>035<br>8 | 0.00<br>097<br>1 | 0.00<br>0204 | 0.00<br>0409 | 0            | 0.00<br>1226 | 0.00<br>0102 | 0.00<br>0358 | 0.00<br>0767 | 0            | 5.11<br>E-05 | 5.11<br>E-05 | 0            | 5.11<br>E-05 | 0            | 0.00<br>0511 | 0.00<br>0102 | 0            | 5.11<br>E-05 | 5.11<br>E-05 | 0.00<br>0153 | 0            | 0            | 5.11<br>E-05 | 0            | 0.00<br>0307 | 0.00<br>0204 | 0.00<br>0102 | 0.00<br>0613 |
| Lemur          | omnivore  | 0.00<br>061<br>4 | 0.00<br>120<br>9 | 0.00<br>0238 | 0.00<br>0931 | 0.00<br>0178 | 0.00<br>1902 | 0.00<br>0258 | 0.00<br>0832 | 0.00<br>0812 | 0            | 0.00<br>0139 | 0.00<br>0139 | 1.98<br>E-05 | 0            | 0            | 0.00<br>0416 | 0.00<br>0139 | 0            | 1.98<br>E-05 | 9.91<br>E-05 | 0.00<br>0159 | 0            | 0            | 7.93<br>E-05 | 1.98<br>E-05 | 0.00<br>0456 | 0.00<br>0159 | 0.00<br>0258 | 0.00<br>1209 |
| Marmoset       | omnivore  | 0.00<br>062<br>1 | 0.00<br>079<br>6 | 0.00<br>0505 | 0.00<br>0971 | 0.00<br>0155 | 0.00<br>3223 | 7.77<br>E-05 | 0.00<br>1359 | 0.00<br>0893 | 1.94<br>E-05 | 1.94<br>E-05 | 0.00<br>0252 | 0            | 0            | 0            | 0.00<br>0447 | 0.00<br>033  | 0            | 1.94<br>E-05 | 3.88<br>E-05 | 0.00<br>0291 | 0            | 0            | 0            | 0.00<br>1359 | 0.00<br>0136 | 0.00<br>0252 | 0.00<br>1107 |              |

|                   |               |                  |                  |              |              |              |              |              |              |              |              |              |              |              |              |              |              |              |              |              |              |              |              |              |              |              |              |              |              |              |           |
|-------------------|---------------|------------------|------------------|--------------|--------------|--------------|--------------|--------------|--------------|--------------|--------------|--------------|--------------|--------------|--------------|--------------|--------------|--------------|--------------|--------------|--------------|--------------|--------------|--------------|--------------|--------------|--------------|--------------|--------------|--------------|-----------|
| Mouse             | omniv<br>ore  | 0.00<br>039<br>6 | 0.00<br>071<br>6 | 0.00<br>0297 | 0.00<br>0642 | 0.00<br>0171 | 0.00<br>1944 | 0.00<br>0136 | 0.00<br>0533 | 0.00<br>0771 | 2.43<br>E-06 | 0.00<br>0108 | 5.02<br>E-05 | 8.10<br>E-07 | 3.00<br>E-05 | 3.24<br>E-06 | 0.00<br>0261 | 6.72<br>E-05 | 0            | 2.83<br>E-05 | 5.99<br>E-05 | 0.00<br>0229 | 0            | 2.43<br>E-06 | 0.00<br>0122 | 6.48<br>E-06 | 0.00<br>0413 | 0.00<br>0225 | 0.00<br>0354 | 0.00<br>1024 |           |
| Saki              | omniv<br>ore  | 0.00<br>050<br>4 | 0.00<br>097<br>6 | 0.00<br>0299 | 0.00<br>0456 | 0.00<br>015  | 0.00<br>1723 | 6.30<br>E-05 | 0.00<br>1125 | 0.00<br>0582 | 0            | 0.00<br>0228 | 0.00<br>0205 | 0            | 0            | 1.57<br>E-05 | 0.00<br>0315 | 0.00<br>0181 | 0            | 1.57<br>E-05 | 0.00<br>0126 | 0.00<br>011  | 0            | 0            | 6.30<br>E-05 | 0            | 0.00<br>0252 | 9.44<br>E-05 | 6.30<br>E-05 | 0.00<br>0921 |           |
| SpecBear          | omniv<br>ore  | 0.00<br>079<br>5 | 0.00<br>146<br>2 | 0.00<br>0333 | 0.00<br>1897 | 0.00<br>0128 | 0.00<br>3    | 0.00<br>0231 | 0.00<br>318  | 0.00<br>0744 | 5.13<br>E-05 | 0.00<br>0615 | 0.00<br>0128 | 0            | 5.13<br>E-05 | 0            | 7.69<br>E-05 | 2.56<br>E-05 | 5.13<br>E-05 | 5.13<br>E-05 | 5.13<br>E-05 | 0.00<br>0103 | 0            | 0            | 2.56<br>E-05 | 0            | 0.00<br>0564 | 0.00<br>0231 | 0.00<br>0564 | 0.00<br>0179 |           |
| Squirrel          | omniv<br>ore  | 0.00<br>054<br>9 | 0.00<br>066<br>3 | 0.00<br>048  | 0.00<br>1967 | 0.00<br>0252 | 0.00<br>215  | 9.15<br>E-05 | 0.00<br>167  | 0.00<br>1281 | 0            | 4.57<br>E-05 | 4.57<br>E-05 | 0            | 2.29<br>E-05 | 0            | 0.00<br>0435 | 4.57<br>E-05 | 0            | 0            | 6.86<br>E-05 | 0.00<br>0274 | 0            | 0            | 2.29<br>E-05 | 0            | 0.00<br>2562 | 0.00<br>0457 | 0.00<br>0252 | 0.00<br>0961 |           |
| CD.70.13<br>0117  | panda         | 0.00<br>146      | 0.00<br>168<br>5 | 0.00<br>0708 | 0.00<br>1598 | 0.00<br>0238 | 0.00<br>3571 | 0.00<br>0523 | 0.00<br>2031 | 0.00<br>1361 | 0.00<br>0263 | 0.00<br>0242 | 0.00<br>0623 | 0.00<br>0142 | 0.00<br>0419 | 0.00<br>0602 | 0.00<br>0926 | 0.00<br>0196 | 0.00<br>0747 | 0.00<br>0412 | 0.00<br>0451 | 0.00<br>0618 | 0.00<br>0109 | 6.41<br>E-05 | 0.00<br>0823 | 0.00<br>0208 | 0.00<br>1611 | 0.00<br>1135 | 0.00<br>391  | 0.00<br>1603 |           |
| CD.73.13<br>0415  | panda         | 0.00<br>183<br>5 | 0.00<br>210<br>5 | 0.00<br>0751 | 0.00<br>1881 | 0.00<br>036  | 0.00<br>3622 | 0.00<br>0738 | 0.00<br>2134 | 0.00<br>1535 | 0.00<br>0374 | 0.00<br>0382 | 0.00<br>0756 | 0.00<br>0201 | 0.00<br>0574 | 0.00<br>0829 | 0.00<br>0957 | 0.00<br>0282 | 0.00<br>0725 | 0.00<br>0213 | 0.00<br>0746 | 0.00<br>0732 | 0.00<br>027  | 9.07<br>E-05 | 0.00<br>0952 | 0.00<br>0187 | 0.00<br>1061 | 0.00<br>0588 | 0.00<br>1705 | 0.00<br>1736 |           |
| CX.39.13<br>0208  | panda         | 0.00<br>067      | 0.00<br>126<br>6 | 0.00<br>0876 | 0.00<br>2073 | 0.00<br>0289 | 0.00<br>425  | 0.00<br>0176 | 0.00<br>3615 | 0.00<br>1883 | 0.00<br>0134 | 0.00<br>0116 | 0.00<br>0188 | 4.90<br>E-05 | 0.00<br>0139 | 0.00<br>0246 | 0.00<br>0969 | 8.64<br>E-05 | 0.00<br>0201 | 9.74<br>E-05 | 0.00<br>0218 | 0.00<br>0216 | 6.93<br>E-05 | 3.05<br>E-05 | 0.00<br>0285 | 6.92<br>E-05 | 0.00<br>4312 | 0.00<br>0306 | 0.00<br>0444 | 0.00<br>0377 |           |
| CX.6.121<br>213   | panda         | 0.00<br>173      | 0.00<br>195<br>7 | 0.00<br>0599 | 0.00<br>1915 | 0.00<br>0262 | 0.00<br>3485 | 0.00<br>0563 | 0.00<br>2057 | 0.00<br>1663 | 0.00<br>0276 | 0.00<br>0334 | 0.00<br>0645 | 0.00<br>0108 | 0.00<br>0436 | 0.00<br>0393 | 0.00<br>0635 | 0.00<br>0265 | 0.00<br>035  | 0.00<br>0518 | 0.00<br>0366 | 0.00<br>0462 | 0.00<br>0122 | 6.18<br>E-05 | 0.00<br>0512 | 9.21<br>E-05 | 0.00<br>2546 | 0.00<br>0935 | 0.00<br>113  | 0.00<br>1183 |           |
| EQ.118.1<br>30124 | panda         | 0.00<br>215<br>2 | 0.00<br>234<br>8 | 0.00<br>0731 | 0.00<br>1988 | 0.00<br>0346 | 0.00<br>3621 | 0.00<br>0813 | 0.00<br>1989 | 0.00<br>1461 | 0.00<br>0447 | 0.00<br>0304 | 0.00<br>0615 | 0.00<br>0236 | 0.00<br>0547 | 0.00<br>0808 | 0.00<br>0833 | 0.00<br>0265 | 0.00<br>0578 | 0.00<br>0343 | 0.00<br>0613 | 0.00<br>0684 | 0.00<br>0199 | 0.00<br>0111 | 0.00<br>0822 | 0.00<br>0174 | 0.00<br>1242 | 0.00<br>033  | 0.00<br>1666 | 0.00<br>1348 |           |
| EQ.128.1<br>30507 | panda         | 0.00<br>151<br>5 | 0.00<br>176<br>8 | 0.00<br>0645 | 0.00<br>1768 | 0.00<br>0241 | 0.00<br>3662 | 0.00<br>0532 | 0.00<br>2597 | 0.00<br>1368 | 0.00<br>0238 | 0.00<br>0285 | 0.00<br>0505 | 0.00<br>0113 | 0.00<br>0361 | 0.00<br>0461 | 0.00<br>07   | 0.00<br>0246 | 0.00<br>0326 | 0.00<br>0317 | 0.00<br>041  | 0.00<br>0519 | 0.00<br>012  | 5.83<br>E-05 | 0.00<br>0454 | 9.44<br>E-05 | 0.00<br>2838 | 0.00<br>0539 | 0.00<br>1675 | 0.00<br>1102 |           |
| HH.192.0<br>90930 | panda         | 0.00<br>139<br>6 | 0.00<br>164<br>6 | 0.00<br>0712 | 0.00<br>1793 | 0.00<br>0283 | 0.00<br>3679 | 0.00<br>0595 | 0.00<br>2643 | 0.00<br>142  | 0.00<br>0211 | 0.00<br>0328 | 0.00<br>0584 | 0.00<br>0114 | 0.00<br>0404 | 0.00<br>059  | 0.00<br>0843 | 0.00<br>0193 | 0.00<br>0564 | 0.00<br>0129 | 0.00<br>0622 | 0.00<br>0618 | 0.00<br>017  | 6.43<br>E-05 | 0.00<br>0625 | 0.00<br>0189 | 0.00<br>3226 | 0.00<br>0292 | 0.00<br>1423 | 0.00<br>1036 |           |
| HQ.47.13<br>0816  | panda         | 0.00<br>182<br>3 | 0.00<br>201<br>9 | 0.00<br>0503 | 0.00<br>1476 | 0.00<br>0172 | 0.00<br>341  | 0.00<br>0767 | 0.00<br>2538 | 0.00<br>1253 | 0.00<br>0256 | 0.00<br>0368 | 0.00<br>0615 | 0.00<br>0117 | 0.00<br>0367 | 0.00<br>0428 | 0.00<br>039  | 0.00<br>033  | 0.00<br>0268 | 0.00<br>035  | 0.00<br>0343 | 0.00<br>0485 | 0.00<br>0111 | 4.92<br>E-05 | 0.00<br>0246 | 0.00<br>0153 | 0.00<br>2766 | 0.00<br>0349 | 0.00<br>1006 | 0.00<br>0874 |           |
| HQ.59.13<br>0113  | panda         | 0.00<br>148<br>9 | 0.00<br>121<br>2 | 0.00<br>0761 | 0.00<br>2069 | 0.00<br>0171 | 0.00<br>3975 | 0.00<br>0325 | 0.00<br>3565 | 0.00<br>1373 | 0.00<br>0165 | 0.00<br>0237 | 0.00<br>0289 | 7.05<br>E-05 | 0.00<br>0233 | 0.00<br>0276 | 0.00<br>095  | 0.00<br>0118 | 0.00<br>0272 | 8.37<br>E-05 | 0.00<br>0269 | 0.00<br>0266 | 9.02<br>E-05 | 3.79<br>E-05 | 0.00<br>0305 | 0.00<br>0102 | 0.00<br>2494 | 0.00<br>046  | 0.00<br>043  | 0.00<br>0853 |           |
| JJ.234.13<br>0208 | panda         | 0.00<br>197<br>7 | 0.00<br>212<br>2 | 0.00<br>088  | 0.00<br>2253 | 0.00<br>0476 | 0.00<br>3869 | 0.00<br>0661 | 0.00<br>2221 | 0.00<br>1773 | 0.00<br>0383 | 0.00<br>0401 | 0.00<br>0724 | 0.00<br>0204 | 0.00<br>0507 | 0.00<br>0966 | 0.00<br>1126 | 0.00<br>0337 | 0.00<br>0773 | 0.00<br>0352 | 0.00<br>0847 | 0.00<br>078  | 0.00<br>0326 | 0.00<br>0115 | 0.00<br>0963 | 0.00<br>0173 | 0.00<br>1017 | 0.00<br>0355 | 0.00<br>1331 | 0.00<br>1663 |           |
| JJ.257.13<br>0514 | panda         | 0.00<br>190<br>2 | 0.00<br>213<br>4 | 0.00<br>074  | 0.00<br>1821 | 0.00<br>0362 | 0.00<br>3277 | 0.00<br>0679 | 0.00<br>2077 | 0.00<br>1552 | 0.00<br>0351 | 0.00<br>0374 | 0.00<br>0698 | 0.00<br>02   | 0.00<br>047  | 0.00<br>0836 | 0.00<br>0927 | 0.00<br>0293 | 0.00<br>0641 | 0.00<br>0166 | 0.00<br>0915 | 0.00<br>0676 | 0.00<br>0226 | 9.27<br>E-05 | 0.00<br>08   | 0.00<br>0179 | 0.00<br>1001 | 0.00<br>0376 | 0.00<br>1865 | 0.00<br>2348 |           |
| NN.149.0<br>91002 | panda         | 0.00<br>222      | 0.00<br>216<br>2 | 0.00<br>0737 | 0.00<br>1793 | 0.00<br>0361 | 0.00<br>3342 | 0.00<br>0687 | 0.00<br>195  | 0.00<br>1531 | 0.00<br>0352 | 0.00<br>0337 | 0.00<br>0658 | 0.00<br>0221 | 0.00<br>0553 | 0.00<br>0853 | 0.00<br>0915 | 0.00<br>0287 | 0.00<br>0796 | 0.00<br>0239 | 0.00<br>0708 | 0.00<br>078  | 0.00<br>0261 | 8.73<br>E-05 | 0.00<br>0901 | 0.00<br>0177 | 0.00<br>091  | 0.00<br>0525 | 0.00<br>0455 | 0.00<br>1381 |           |
| QF.135.0<br>91001 | panda         | 0.00<br>179<br>6 | 0.00<br>178<br>3 | 0.00<br>0554 | 0.00<br>1992 | 0.00<br>0223 | 0.00<br>3836 | 0.00<br>0655 | 0.00<br>2589 | 0.00<br>1482 | 0.00<br>0213 | 0.00<br>0244 | 0.00<br>0519 | 0.00<br>0107 | 0.00<br>0342 | 0.00<br>0309 | 0.00<br>0455 | 0.00<br>0236 | 0.00<br>0238 | 0.00<br>03   | 0.00<br>0358 | 0.00<br>0333 | 0.00<br>0122 | 4.73<br>E-05 | 0.00<br>0288 | 9.24<br>E-05 | 0.00<br>4479 | 0.00<br>0435 | 0.00<br>1147 | 0.00<br>0874 |           |
| QQ.102.1<br>30620 | panda         | 0.00<br>190<br>3 | 0.00<br>236<br>3 | 0.00<br>0544 | 0.00<br>1757 | 0.00<br>027  | 0.00<br>3656 | 0.00<br>0891 | 0.00<br>2294 | 0.00<br>1648 | 0.00<br>0374 | 0.00<br>0304 | 0.00<br>0859 | 0.00<br>0158 | 0.00<br>0557 | 0.00<br>0681 | 0.00<br>0688 | 0.00<br>0433 | 0.00<br>0428 | 0.00<br>0204 | 0.00<br>0559 | 0.00<br>0598 | 0.00<br>0185 | 7.91<br>E-05 | 0.00<br>0503 | 0.00<br>0182 | 0.00<br>1779 | 0.00<br>0187 | 0.00<br>0977 | 0.00<br>1585 |           |
| QQ.98.13<br>0411  | panda         | 0.00<br>199<br>8 | 0.00<br>224<br>9 | 0.00<br>0687 | 0.00<br>1898 | 0.00<br>0335 | 0.00<br>3628 | 0.00<br>0939 | 0.00<br>2176 | 0.00<br>1593 | 0.00<br>0391 | 0.00<br>0348 | 0.00<br>0758 | 0.00<br>0196 | 0.00<br>0603 | 0.00<br>0777 | 0.00<br>084  | 0.00<br>0301 | 0.00<br>0608 | 0.00<br>0227 | 0.00<br>0698 | 0.00<br>068  | 0.00<br>022  | 0.00<br>01   | 0.00<br>0818 | 0.00<br>0165 | 0.00<br>1381 | 0.00<br>035  | 0.00<br>2025 | 0.00<br>1399 |           |
| SY.167.0<br>91121 | panda         | 0.00<br>164<br>5 | 0.00<br>162<br>6 | 0.00<br>0305 | 0.00<br>0759 | 0.00<br>015  | 0.00<br>047  | 0.00<br>015  | 0.00<br>208  | 0.00<br>0657 | 0.00<br>0278 | 4.14<br>E-05 | 0.00<br>0503 | 0.00<br>0122 | 9.40<br>E-06 | 0.00<br>0224 | 0.00<br>0348 | 0.00<br>0247 | 0.00<br>0985 | 1.84<br>E-05 | 0.00<br>0169 | 4.48<br>E-05 | 7.28<br>E-05 | 1.76<br>E-05 | 1.36<br>E-05 | 0.00<br>0466 | 0.00<br>0669 | 0.00<br>01   | 0.00<br>0118 | 8.08<br>E-05 |           |
| YL.173.0<br>90701 | panda         | 0.00<br>179<br>9 | 0.00<br>228<br>7 | 0.00<br>06   | 0.00<br>1845 | 0.00<br>0374 | 0.00<br>55   | 0.00<br>0625 | 0.00<br>2007 | 0.00<br>1173 | 0.00<br>0119 | 0.00<br>0116 | 0.00<br>0171 | 7.08<br>E-05 | 0.00<br>0189 | 0.00<br>0174 | 0.00<br>0451 | 0.00<br>0265 | 0.00<br>0104 | 0.00<br>0364 | 0.00<br>0301 | 0.00<br>066  | 3.56<br>E-05 | 2.65<br>E-05 | 0.00<br>0256 | 3.09<br>E-05 | 0.00<br>2754 | 0.00<br>0361 | 0.00<br>0247 | 0.00<br>0866 |           |
| YL.178.0<br>91015 | panda         | 0.00<br>202<br>1 | 0.00<br>239<br>2 | 0.00<br>0573 | 0.00<br>1268 | 0.00<br>0348 | 0.00<br>421  | 0.00<br>0622 | 0.00<br>2242 | 0.00<br>0977 | 0.00<br>0133 | 0.00<br>0229 | 0.00<br>0225 | 5.95<br>E-05 | 0.00<br>0191 | 0.00<br>0214 | 0.00<br>0548 | 0.00<br>0286 | 0.00<br>015  | 0.00<br>0208 | 0.00<br>0202 | 0.00<br>064  | 5.44<br>E-05 | 2.38<br>E-05 | 0.00<br>021  | 6.24<br>E-05 | 0.00<br>3856 | 0.00<br>0604 | 0.00<br>0595 | 0.00<br>1064 |           |
| ZZ.109.1<br>30808 | panda         | 0.00<br>209<br>3 | 0.00<br>223<br>2 | 0.00<br>0779 | 0.00<br>2026 | 0.00<br>0386 | 0.00<br>3608 | 0.00<br>0879 | 0.00<br>2155 | 0.00<br>1586 | 0.00<br>0419 | 0.00<br>0463 | 0.00<br>0696 | 0.00<br>0233 | 0.00<br>0597 | 0.00<br>093  | 0.00<br>0943 | 0.00<br>0302 | 0.00<br>0653 | 0.00<br>0221 | 0.00<br>0898 | 0.00<br>0771 | 0.00<br>0256 | 0.00<br>0118 | 0.00<br>0919 | 0.00<br>0196 | 0.00<br>0322 | 0.00<br>1954 | 0.00<br>1535 |              |           |
| T-test<br>(panda) | DiffPa<br>irs | NP<br><_P        | NP<br><_P        | NP<br><_P    | NP<br><_P    | NP<br><_P    | NP<br><_P    | NP<br><_P    | NP<br><_P    | NP<br><_P    | NP<br><_P    | NP<br><_P    | NP<br><_P    | NP<br><_P    | NP<br><_P    | NP<br><_P    | NP<br><_P    | NP<br><_P    | NP<br><_P    | NP<br><_P    | NP<br><_P    | NP<br><_P    | NP<br><_P    | NP<br><_P    | NP<br><_P    | NP<br><_P    | NP<br><_P    | NP<br><_P    | NP<br><_P    | NP<br><_P    | NP<br><_P |

| and no-panda)     | PairsP values | 3.06      | 1.89      | 3.45      | 5.80      | 2.02      | 2.90      | 8.88      | 6.68      | 4.13      | 9.46      | 1.68      | 3.34      | 7.84      | 1.42      | 7.84      | 8.53      | 1.11      | 1.71      | 1.70      | 1.65      | 1.91      | 2.03      | 3.42      | 1.37      | 2.64      | 4.62      | 2.07      | 7.64      | 0.00      |      |           |
|-------------------|---------------|-----------|-----------|-----------|-----------|-----------|-----------|-----------|-----------|-----------|-----------|-----------|-----------|-----------|-----------|-----------|-----------|-----------|-----------|-----------|-----------|-----------|-----------|-----------|-----------|-----------|-----------|-----------|-----------|-----------|------|-----------|
|                   |               | E-25      | E-17      | E-15      | E-15      | E-14      | E-13      | E-13      | E-13      | E-12      | E-10      | E-10      | E-09      | E-09      | E-09      | E-08      | E-08      | E-08      | E-07      | E-07      | E-07      | E-07      | E-07      | E-07      | E-07      | E-06      | E-06      | E-06      | E-05      | E-05      | 0.00 | 0.00      |
|                   | PairsQ values | 1.77      | 5.47      | 5.01      | 6.73      | 1.68      | 1.53      | 4.29      | 2.58      | 1.20      | 2.61      | 4.44      | 8.43      | 1.90      | 3.30      | 1.57      | 1.65      | 2.08      | 2.83      | 2.91      | 2.99      | 3.07      | 3.18      | 4.95      | 1.94      | 3.65      | 6.09      | 2.67      | 9.23      | 0.00      |      |           |
|                   |               | E-23      | E-16      | E-14      | E-14      | E-13      | E-12      | E-12      | E-11      | E-09      | E-09      | E-09      | E-09      | E-08      | E-08      | E-07      | E-07      | E-07      | E-07      | E-07      | E-07      | E-07      | E-07      | E-07      | E-06      | E-06      | E-06      | E-06      | E-05      | 0.00      | 0.00 |           |
|                   |               | CE1       | GH7       | GH3       | GH1       | GH3       | GH5       | GH9       | GH1       | GH9       | GH3       | GH2       | GH1       | GH9       | GH5       | GH2       | GH1       | GH1       | GH1       | CB        | CB        | GH1       | GH3       | GH1       | GH7       | GH4       | GH1       | GH1       | GH6       | GH1       | GH8  |           |
|                   |               | 1         | 7         | 3         | 04        | 2         | 8         | 0         | 30        | 5         | 13        | 9         | 33        | 7         | 7         | 2         | 0         | 09        | 15        | M67       | 23        | 0         | M62       | 6         | 4         | 12        | 7         | 6         | 17        | 6         |      |           |
| Armadillo         | carnivore     | 6.96 E-05 | 6.96 E-05 | 3.48 E-05 | 0         | 0.00      | 0         | 0         | 0.00      | 0.00      | 0.00      | 0.00      | 0.00      | 0.00      | 0.00      | 0.00      | 0.00      | 0.00      | 0.00      | 0         | 0         | 0.00      | 0.00      | 0.00      | 0.00      | 0.00      | 0.00      | 0         | 0         | 6.96 E-05 | 0    |           |
| BelugaWhale       | carnivore     | 4.18 E-06 | 0         | 0         | 0         | 4.18 E-06 | 0         | 0         | 0         | 0         | 0         | 4.18 E-06 | 4.18 E-06 | 0         | 2.30 E-05 | 2.51 E-05 | 6.26 E-06 | 0         | 0         | 0         | 0         | 0         | 0         | 4.18 E-06 | 1.04 E-05 | 0         | 2.09 E-06 | 0         | 0         | 0         | 0    |           |
| BottlenoseDolphin | carnivore     | 0         | 0         | 0         | 0         | 4.93 E-06 | 0         | 0         | 0         | 1.97 E-06 | 0         | 3.95 E-06 | 3.95 E-06 | 9.87 E-07 | 1.97 E-06 | 5.92 E-06 | 7.89 E-06 | 1.97 E-06 | 0         | 0         | 0         | 0         | 0         | 1.97 E-06 | 3.95 E-06 | 0         | 9.87 E-07 | 0         | 0         | 0         | 0    |           |
| BushDog           | carnivore     | 7.73 E-05 | 0         | 3.09 E-05 | 0         | 0.00      | 0.00      | 0.00      | 0.00      | 0.00      | 0.00      | 0.00      | 0.00      | 0.00      | 0.00      | 0.00      | 0.00      | 0.00      | 0.00      | 0.00      | 0.00      | 0.00      | 0.00      | 0.00      | 0.00      | 0.00      | 0.00      | 0.00      | 0.00      | 0.00      | 0.00 |           |
| Coyote            | carnivore     | 9.03 E-05 | 0         | 2.46 E-05 | 1.33 E-06 | 0.00      | 0.00      | 0         | 6.04 E-05 | 0.00      | 0.00      | 4.91 E-05 | 6.04 E-05 | 0.00      | 2.92 E-05 | 0.00      | 0.00      | 8.97 E-05 | 2.66 E-06 | 6.64 E-06 | 6.97 E-05 | 8.43 E-05 | 5.98 E-05 | 4.45 E-05 | 7.04 E-05 | 6.91 E-05 | 0         | 4.65 E-06 | 4.65 E-06 | 0         |      |           |
| Echidna           | carnivore     | 0.00      | 0.018     | 0         | 3.06 E-05 | 0         | 0.00      | 0.00      | 0.00      | 0.00      | 0         | 6.13 E-05 | 0         | 1.53 E-05 | 0         | 0.00      | 7.66 E-05 | 0         | 1.53 E-05 | 3.06 E-05 | 0         | 0         | 0         | 1.53 E-05 | 0.00      | 4.60 E-05 | 0         | 1.53 E-05 | 1.53 E-05 | 0         | 0    |           |
| Fisher            | carnivore     | 3.00 E-05 | 0         | 6.48 E-06 | 6.48 E-06 | 0.00      | 0         | 0         | 3.00 E-05 | 0.00      | 4.05 E-06 | 0.00      | 1.62 E-05 | 3.57 E-05 | 4.46 E-05 | 0.00      | 0.00      | 9.40 E-05 | 1.46 E-05 | 0         | 3.00 E-05 | 6.97 E-05 | 6.48 E-06 | 8.11 E-06 | 0.00      | 9.97 E-05 | 0         | 0         | 4.05 E-06 | 0         |      |           |
| HumpbackWhale     | carnivore     | 0.00      | 0.013     | 0         | 5.41 E-05 | 1.18 E-05 | 0         | 0         | 6.59 E-05 | 0.00      | 0.00      | 0.00      | 0.00      | 0.00      | 0.00      | 0.00      | 0.00      | 0.00      | 1.08 E-05 | 1.57 E-05 | 0.00      | 0.00      | 1.48 E-06 | 0.00      | 0.00      | 0.00      | 0.00      | 0.00      | 2.95 E-06 | 8.86 E-06 | 0.00 | 4.92 E-06 |
| Hyena             | carnivore     | 0.00      | 0.017     | 0         | 7.30 E-05 | 0         | 0.00      | 0         | 7.30 E-05 | 0.00      | 4.38 E-05 | 0.00      | 0.00      | 0.00      | 0.00      | 0.00      | 0.00      | 0.00      | 4.38 E-05 | 0         | 2.92 E-05 | 8.76 E-05 | 5.84 E-05 | 5.84 E-05 | 0.00      | 0.00      | 0.00      | 0.00      | 2.92 E-05 | 7.30 E-05 | 0    |           |
| Lion1             | carnivore     | 0.00      | 0.014     | 7.02 E-05 | 0         | 7.02 E-05 | 0.00      | 0         | 7.02 E-05 | 0.00      | 0         | 0.00      | 0.00      | 0.00      | 0.00      | 0.00      | 0.00      | 0.00      | 0         | 0         | 0.00      | 0         | 0         | 0.00      | 0.00      | 0.00      | 0.00      | 0         | 0         | 0         | 0    |           |
| Lion2             | carnivore     | 0.00      | 0.00      | 0.00      | 0.00      | 0.00      | 8.00 E-05 | 0         | 8.00 E-05 | 0.00      | 8.00 E-05 | 0.00      | 8.00 E-05 | 0.00      | 0.00      | 0.00      | 0.00      | 8.00 E-05 | 1.33 E-05 | 0.00      | 0.00      | 4.00 E-05 | 4.00 E-05 | 1.33 E-05 | 4.00 E-05 | 0.00      | 8.00 E-05 | 1.33 E-05 | 0         | 2.67 E-05 | 0    |           |
| PolarBear         | carnivore     | 0.00      | 0.00      | 0.00      | 7.09 E-05 | 0.00      | 1.77 E-05 | 0         | 1.77 E-05 | 1.77 E-05 | 0         | 0         | 0         | 0         | 0         | 0         | 0.00      | 1.77 E-05 | 0         | 0         | 0         | 0         | 0         | 0         | 0.00      | 3.55 E-05 | 0         | 0         | 0         | 0         | 0    |           |
| RightWhaleF11     | carnivore     | 6.15 E-05 | 0         | 2.26 E-05 | 9.05 E-07 | 4.98 E-05 | 1.81 E-06 | 0         | 6.97 E-05 | 0.00      | 0.00      | 0.00      | 0.00      | 0.00      | 0.00      | 0.00      | 0.00      | 9.95 E-06 | 3.71 E-05 | 6.42 E-05 | 4.25 E-05 | 3.62 E-06 | 9.95 E-06 | 0.00      | 0.00      | 3.62 E-06 | 1.81 E-06 | 5.34 E-05 | 0         | 0         |      |           |
| RightWhaleF16     | carnivore     | 0.00      | 0.014     | 0         | 5.89 E-05 | 5.63 E-06 | 5.58 E-05 | 0         | 0         | 0.00      | 0.00      | 0.00      | 0.00      | 0.00      | 0.00      | 0.00      | 0.00      | 5.19 E-06 | 3.25 E-05 | 0.00      | 0.00      | 7.96 E-05 | 1.95 E-05 | 1.99 E-05 | 0.00      | 0.00      | 0.00      | 0.00      | 0.00      | 3.46 E-06 |      |           |
| RightWhaleF9      | carnivore     | 0.00      | 0.017     | 0         | 6.85 E-05 | 4.09 E-06 | 5.93 E-05 | 2.04 E-06 | 0         | 0.00      | 0.00      | 0.00      | 0.00      | 0.00      | 0.00      | 0.00      | 0.00      | 5.11 E-06 | 3.78 E-05 | 0.00      | 0.00      | 8.99 E-05 | 4.50 E-05 | 1.94 E-05 | 0.00      | 0.00      | 8.17 E-06 | 3.07 E-06 | 0.00      | 0         |      |           |
| Gorilla           | herbivore     | 8.02 E-05 | 0         | 8.02 E-05 | 0         | 8.02 E-05 | 0         | 0         | 8.02 E-05 | 0.00      | 0.00      | 0.00      | 0.00      | 0.00      | 0.00      | 0.00      | 0.00      | 8.02 E-05 | 8.02 E-05 | 4.01 E-05 | 4.01 E-05 | 0         | 0         | 4.01 E-05 | 0.00      | 4.01 E-05 | 0         | 0         | 0         | 4.01 E-05 | 0    |           |
| AfricanElephant   | herbivore     | 0.00      | 0.012     | 0         | 3.55 E-05 | 7.10 E-06 | 9.94 E-05 | 0         | 5.68 E-05 | 0.00      | 0.00      | 0.00      | 0.00      | 0.00      | 0.00      | 0.00      | 0.00      | 0.00      | 2.84 E-05 | 3.55 E-05 | 5.68 E-05 | 7.10 E-06 | 7.10 E-06 | 0.00      | 1.42 E-05 | 0         | 7.10 E-06 | 7.10 E-06 | 0         | 0         |      |           |
| BigHornsheepSD    | herbivore     | 4.38 E-05 | 0         | 2.19 E-05 | 0         | 0.00      | 0         | 0         | 0.00      | 0.00      | 0.00      | 0.00      | 0.00      | 0.00      | 0.00      | 0.00      | 0.00      | 8.76 E-05 | 2.19 E-05 | 2.19 E-05 | 6.57 E-05 | 2.19 E-05 | 2.19 E-05 | 0.00      | 8.76 E-05 | 2.19 E-05 | 2.19 E-05 | 2.19 E-05 | 0         | 0         |      |           |
| BigHornsheepW3    | herbivore     | 9.64 E-05 | 0         | 0         | 1.93 E-05 | 0.00      | 0.00      | 0         | 0.00      | 0.00      | 0.00      | 0.00      | 7.71 E-05 | 0.00      | 0.00      | 0.00      | 0.00      | 0.00      | 0.00      | 0.00      | 0.00      | 0.00      | 0.00      | 0.00      | 0.00      | 0.00      | 0.00      | 0.00      | 0.00      | 0.00      | 0    |           |
| BlackRhino        | herbivore     | 0.00      | 0.010     | 0         | 1.06 E-05 | 1.06 E-05 | 0.00      | 0         | 0.00      | 0.00      | 0.00      | 0.00      | 0.00      | 0.00      | 0.00      | 0.00      | 0.00      | 0.00      | 6.35 E-05 | 5.29 E-05 | 9.52 E-05 | 1.06 E-05 | 1.06 E-05 | 0.00      | 1.06 E-05 | 0         | 0         | 1.06 E-05 | 0         | 0         |      |           |
| Capybara          | herbivore     | 0.00      | 0.014     | 0         | 0         | 0         | 0.00      | 0         | 0.00      | 0.00      | 0.00      | 0.00      | 0.00      | 0.00      | 0.00      | 0.00      | 0.00      | 0.00      | 2.79 E-05 | 9.31 E-06 | 0.00      | 1.86 E-05 | 0         | 0.00      | 1.86 E-05 | 9.31 E-06 | 0         | 9.31 E-06 | 2.79 E-05 | 0         |      |           |
| ColobusMonkey     | herbivore     | 7.39 E-05 | 0         | 2.96 E-05 | 0         | 8.87 E-05 | 0         | 0         | 0.00      | 0.00      | 8.87 E-05 | 0.00      | 0.00      | 0.00      | 0.00      | 0.00      | 0.00      | 5.92 E-05 | 0.00      | 4.44 E-05 | 0.00      | 0         | 2.96 E-05 | 0.00      | 7.39 E-05 | 1.48 E-05 | 4.44 E-05 | 1.48 E-05 | 0         | 0         |      |           |
| Gazelle           | herbivore     | 4.39 E-05 | 0         | 0         | 1.46 E-05 | 0.00      | 0.00      | 0         | 0.00      | 0.00      | 0.00      | 0.00      | 0.00      | 0.00      | 0.00      | 0.00      | 0.00      | 0         | 4.39 E-05 | 8.79 E-05 | 5.86 E-05 | 1.46 E-05 | 1.46 E-05 | 0.00      | 8.79 E-05 | 1.46 E-05 | 1.46 E-05 | 0         | 0         | 0         |      |           |
| Giraffe           | herbivore     | 0.00      | 0.011     | 0         | 0         | 0         | 0.00      | 0         | 0.00      | 0.00      | 0.00      | 0.00      | 0.00      | 0.00      | 0.00      | 0.00      | 0.00      | 0.00      | 1.86 E-05 | 1.86 E-05 | 0.00      | 5.59 E-05 | 0         | 0.00      | 9.32 E-05 | 5.59 E-05 | 0         | 0         | 1.86 E-05 | 0         |      |           |

|                |           |                  |                  |              |              |              |   |   |              |              |              |              |              |              |              |              |              |              |              |              |              |              |              |              |              |              |              |              |              |              |
|----------------|-----------|------------------|------------------|--------------|--------------|--------------|---|---|--------------|--------------|--------------|--------------|--------------|--------------|--------------|--------------|--------------|--------------|--------------|--------------|--------------|--------------|--------------|--------------|--------------|--------------|--------------|--------------|--------------|--------------|
| Horse          | herbivore | 0.00<br>015<br>2 | 0                | 2.02<br>E-05 | 1.01<br>E-05 | 0.00<br>0111 | 0 | 0 | 0.00<br>0101 | 0.00<br>0486 | 0.00<br>0152 | 0.00<br>0951 | 0.00<br>0283 | 0.00<br>0698 | 0.00<br>0142 | 0.00<br>0881 | 0.00<br>0466 | 0.00<br>0405 | 0.00<br>0162 | 6.07<br>E-05 | 0.00<br>0142 | 0.00<br>0111 | 1.01<br>E-05 | 1.01<br>E-05 | 0.00<br>0425 | 2.02<br>E-05 | 1.01<br>E-05 | 2.02<br>E-05 | 6.07<br>E-05 | 2.02<br>E-05 |
| Horse2         | herbivore | 4.11<br>E-05     | 0                | 8.04<br>E-06 | 0            | 0.00<br>01   | 0 | 0 | 6.16<br>E-05 | 0.00<br>0173 | 1.97<br>E-05 | 0.00<br>0398 | 8.31<br>E-05 | 0.00<br>0133 | 4.74<br>E-05 | 0.00<br>0298 | 0.00<br>0239 | 0.00<br>017  | 5.54<br>E-05 | 1.16<br>E-05 | 6.16<br>E-05 | 4.82<br>E-05 | 5.36<br>E-06 | 6.25<br>E-06 | 0.00<br>0327 | 2.05<br>E-05 | 4.47<br>E-06 | 8.93<br>E-06 | 5.36<br>E-06 | 5.36<br>E-06 |
| HyraxSD        | herbivore | 0.00<br>011<br>9 | 0                | 2.37<br>E-05 | 0            | 9.49<br>E-05 | 0 | 0 | 0.00<br>0119 | 0.00<br>0166 | 0.00<br>0214 | 0.00<br>0300 | 9.49<br>E-05 | 0.00<br>0546 | 0.00<br>0119 | 0.00<br>0973 | 0.00<br>0332 | 0.00<br>0261 | 7.12<br>E-05 | 9.49<br>E-05 | 0            | 7.12<br>E-05 | 7.12<br>E-05 | 4.75<br>E-05 | 0.00<br>038  | 4.75<br>E-05 | 0            | 2.37<br>E-05 | 4.75<br>E-05 | 0            |
| HyraxSTL       | herbivore | 0.00<br>021<br>2 | 0                | 0            | 0            | 0.00<br>0499 | 0 | 0 | 0.00<br>0227 | 0.00<br>0363 | 0.00<br>0166 | 0.00<br>0378 | 0.00<br>0212 | 0.00<br>1059 | 0.00<br>0151 | 0.00<br>0333 | 0.00<br>0318 | 6.05<br>E-05 | 0.00<br>0424 | 4.54<br>E-05 | 3.03<br>E-05 | 0.00<br>0151 | 3.03<br>E-05 | 3.03<br>E-05 | 0.00<br>0529 | 9.08<br>E-05 | 3.03<br>E-05 | 3.03<br>E-05 | 3.03<br>E-05 | 1.51<br>E-05 |
| Kroo3          | herbivore | 0.00<br>027<br>2 | 0                | 0            | 0            | 0.00<br>0181 | 0 | 0 | 9.07<br>E-05 | 0.00<br>0317 | 0.00<br>0136 | 0.00<br>0272 | 0.00<br>0635 | 0            | 0.00<br>0544 | 0.00<br>0317 | 0.00<br>0136 | 0.00<br>0181 | 9.07<br>E-05 | 0.00<br>0181 | 9.07<br>E-05 | 4.54<br>E-05 | 0            | 0.00<br>0227 | 0            | 0            | 0            | 0            | 0            |              |
| Okapi1         | herbivore | 6.10<br>E-05     | 0                | 6.10<br>E-05 | 0            | 6.10<br>E-05 | 0 | 0 | 6.10<br>E-05 | 0.00<br>0488 | 0.00<br>0122 | 0.00<br>0335 | 9.15<br>E-05 | 0.00<br>0427 | 0.00<br>0152 | 0.00<br>0366 | 0.00<br>0549 | 0            | 0.00<br>0122 | 3.05<br>E-05 | 6.10<br>E-05 | 0.00<br>0122 | 0            | 6.10<br>E-05 | 0.00<br>0457 | 0.00<br>0122 | 0            | 0            | 0            | 0            |
| Okapi2         | herbivore | 0.00<br>013<br>3 | 0                | 0            | 0            | 0.00<br>0177 | 0 | 0 | 0.00<br>0133 | 0.00<br>0575 | 0.00<br>0177 | 0.00<br>0354 | 0.00<br>0354 | 0.00<br>0442 | 0.00<br>0133 | 0.00<br>0619 | 0.00<br>0619 | 0.00<br>0354 | 8.84<br>E-05 | 4.42<br>E-05 | 4.42<br>E-05 | 8.84<br>E-05 | 0            | 0            | 0.00<br>0531 | 4.42<br>E-05 | 0            | 0            | 0            | 4.42<br>E-05 |
| Orang1         | herbivore | 6.84<br>E-05     | 0                | 0            | 0            | 6.84<br>E-05 | 0 | 0 | 3.42<br>E-05 | 0.00<br>0171 | 0.00<br>0137 | 0.00<br>024  | 6.84<br>E-05 | 0.00<br>024  | 6.84<br>E-05 | 0.00<br>0171 | 0.00<br>0308 | 3.42<br>E-05 | 3.42<br>E-05 | 6.84<br>E-05 | 0            | 0.00<br>0103 | 0            | 3.42<br>E-05 | 0.00<br>0582 | 6.84<br>E-05 | 3.42<br>E-05 | 6.84<br>E-05 | 0            | 0            |
| Pig            | herbivore | 0.00<br>020<br>3 | 0                | 6.76<br>E-05 | 0            | 0.00<br>0456 | 0 | 0 | 0.00<br>0203 | 0.00<br>0591 | 0.00<br>0169 | 0.00<br>0406 | 0.00<br>0152 | 0.00<br>0591 | 0.00<br>0287 | 0.00<br>0389 | 0.00<br>0439 | 0.00<br>0237 | 0.00<br>0253 | 5.07<br>E-05 | 6.76<br>E-05 | 0.00<br>022  | 3.38<br>E-05 | 5.07<br>E-05 | 0.00<br>0828 | 8.45<br>E-05 | 0            | 0            | 0            | 0            |
| Rabbit1        | herbivore | 0.00<br>013      | 0                | 1.45<br>E-05 | 0            | 0.00<br>0275 | 0 | 0 | 0.00<br>0145 | 0.00<br>0362 | 0.00<br>0159 | 0.00<br>0232 | 0.00<br>0159 | 0.00<br>0145 | 7.24<br>E-05 | 0.00<br>0275 | 0.00<br>0434 | 0.00<br>0145 | 0.00<br>026  | 1.45<br>E-05 | 4.34<br>E-05 | 5.79<br>E-05 | 0            | 0            | 0.00<br>0724 | 0.00<br>0145 | 1.45<br>E-05 | 2.89<br>E-05 | 0            | 1.45<br>E-05 |
| Rabbit2        | herbivore | 8.84<br>E-05     | 0                | 2.05<br>E-06 | 2.90<br>E-06 | 0.00<br>034  | 0 | 0 | 0.00<br>0104 | 0.00<br>027  | 0.00<br>0172 | 0.00<br>0217 | 9.28<br>E-05 | 0.00<br>0161 | 0.00<br>0116 | 0.00<br>0253 | 0.00<br>0238 | 8.55<br>E-05 | 0.00<br>0161 | 8.70<br>E-06 | 4.35<br>E-06 | 8.77<br>E-05 | 4.57<br>E-05 | 1.09<br>E-05 | 0.00<br>0683 | 9.35<br>E-05 | 1.09<br>E-05 | 1.74<br>E-05 | 2.90<br>E-06 | 4.35<br>E-06 |
| Springbok      | herbivore | 8.17<br>E-05     | 0                | 0            | 0            | 0.00<br>0143 | 0 | 0 | 0.00<br>0143 | 0.00<br>0388 | 0.00<br>0143 | 0.00<br>045  | 0.00<br>0102 | 0.00<br>0286 | 0.00<br>0123 | 0.00<br>0572 | 0.00<br>0429 | 0.00<br>0102 | 0.00<br>0102 | 4.09<br>E-05 | 0            | 8.17<br>E-05 | 4.09<br>E-05 | 2.04<br>E-05 | 0.00<br>0163 | 6.13<br>E-05 | 0            | 0            | 0            | 2.04<br>E-05 |
| Urial          | herbivore | 0.00<br>015<br>6 | 0                | 0            | 0            | 0.00<br>0313 | 0 | 0 | 9.38<br>E-05 | 0.00<br>0188 | 0.00<br>0125 | 0.00<br>0375 | 0.00<br>0375 | 0.00<br>0156 | 9.38<br>E-05 | 0.00<br>0281 | 0.00<br>0344 | 6.25<br>E-05 | 9.38<br>E-05 | 3.13<br>E-05 | 0            | 0.00<br>0125 | 0            | 0            | 0.00<br>0375 | 9.38<br>E-05 | 0            | 0            | 0            | 0            |
| Whitetail Deer | herbivore | 0.00<br>011<br>7 | 1.58<br>E-06     | 0.00<br>0185 | 3.96<br>E-06 | 0.00<br>0149 | 0 | 0 | 4.91<br>E-05 | 0.00<br>0173 | 8.87<br>E-05 | 0.00<br>0196 | 0.00<br>0112 | 0.00<br>0109 | 0.00<br>0124 | 0.00<br>0236 | 0.00<br>0183 | 4.59<br>E-05 | 3.17<br>E-05 | 1.66<br>E-05 | 1.82<br>E-05 | 4.99<br>E-05 | 2.22<br>E-05 | 1.74<br>E-05 | 0.00<br>0282 | 3.64<br>E-05 | 7.92<br>E-06 | 3.17<br>E-06 | 7.13<br>E-06 | 2.38<br>E-06 |
| ZebraSTL1      | herbivore | 0.00<br>015<br>6 | 0                | 0            | 0            | 0.00<br>0234 | 0 | 0 | 0.00<br>0156 | 0.00<br>0701 | 0.00<br>0234 | 0.00<br>0934 | 0.00<br>0234 | 0.00<br>0311 | 0.00<br>0117 | 0.00<br>1012 | 0.00<br>0662 | 0.00<br>0311 | 0.00<br>0195 | 3.89<br>E-05 | 0.00<br>0156 | 7.78<br>E-05 | 0            | 0            | 0.00<br>035  | 0            | 0            | 3.89<br>E-05 | 0            | 0            |
| BaboonSTL      | omnivore  | 7.65<br>E-05     | 0                | 1.91<br>E-05 | 0            | 7.65<br>E-05 | 0 | 0 | 7.65<br>E-05 | 0.00<br>0268 | 0.00<br>0153 | 0.00<br>0516 | 0.00<br>0249 | 0.00<br>0459 | 0.00<br>0172 | 0.00<br>0497 | 0.00<br>0363 | 7.65<br>E-05 | 7.65<br>E-05 | 9.56<br>E-05 | 5.74<br>E-05 | 1.91<br>E-05 | 0            | 0            | 0.00<br>0516 | 3.82<br>E-05 | 1.91<br>E-05 | 1.91<br>E-05 | 0            | 1.91<br>E-05 |
| BaboonW        | omnivore  | 6.36<br>E-05     | 0                | 0            | 0            | 0.00<br>0286 | 0 | 0 | 0.00<br>0191 | 0.00<br>0159 | 3.18<br>E-05 | 0.00<br>0286 | 3.18<br>E-05 | 0.00<br>0191 | 0.00<br>0159 | 9.55<br>E-05 | 0.00<br>0127 | 3.18<br>E-05 | 9.55<br>E-05 | 3.18<br>E-05 | 0.00<br>0127 | 0            | 0            | 0            | 0.00<br>0605 | 0            | 3.18<br>E-05 | 6.36<br>E-05 | 0            | 3.18<br>E-05 |
| BlackBear      | omnivore  | 0.00<br>039<br>2 | 0.00<br>066<br>8 | 4.36<br>E-05 | 0.00<br>0102 | 0.00<br>1844 | 0 | 0 | 1.45<br>E-05 | 2.90<br>E-05 | 0            | 1.45<br>E-05 | 1.45<br>E-05 | 5.81<br>E-05 | 0            | 5.81<br>E-05 | 7.26<br>E-05 | 0            | 0            | 0            | 0            | 0            | 0            | 0            | 0.00<br>2047 | 0            | 0            | 1.45<br>E-05 | 0            | 0            |
| BlackLemur     | omnivore  | 0.00<br>021<br>6 | 0                | 0.00<br>0108 | 0            | 0.00<br>0647 | 0 | 0 | 5.39<br>E-05 | 0.00<br>0674 | 5.39<br>E-05 | 0.00<br>0296 | 0.00<br>0135 | 0.00<br>0566 | 8.08<br>E-05 | 0.00<br>0835 | 0.00<br>0674 | 5.39<br>E-05 | 0.00<br>0269 | 0            | 0.00<br>0108 | 0.00<br>0108 | 0            | 2.69<br>E-05 | 0.00<br>0377 | 0.00<br>0189 | 2.69<br>E-05 | 0            | 8.08<br>E-05 | 0            |
| Chimpanzee1    | omnivore  | 0.00<br>015<br>2 | 0                | 3.03<br>E-05 | 0            | 0.00<br>0318 | 0 | 0 | 0.00<br>0167 | 0.00<br>0349 | 0.00<br>0167 | 0.00<br>0303 | 0.00<br>0212 | 0.00<br>0197 | 9.10<br>E-05 | 0.00<br>0318 | 0.00<br>0258 | 0.00<br>0106 | 0.00<br>0152 | 1.52<br>E-05 | 3.03<br>E-05 | 6.06<br>E-05 | 1.52<br>E-05 | 0            | 0.00<br>047  | 0.00<br>0106 | 3.03<br>E-05 | 3.03<br>E-05 | 0            | 0            |
| Chimpanzee2    | omnivore  | 0                | 0                | 0.00<br>0102 | 0            | 0.00<br>0256 | 0 | 0 | 0.00<br>0102 | 0.00<br>0204 | 5.11<br>E-05 | 0.00<br>046  | 0            | 0.00<br>0204 | 0            | 0.00<br>0153 | 0.00<br>0256 | 5.11<br>E-05 | 0.00<br>0102 | 0            | 5.11<br>E-05 | 0.00<br>0204 | 0            | 5.11<br>E-05 | 0.00<br>0409 | 0            | 0            | 0            | 0            | 0            |
| Lemur          | omnivore  | 0.00<br>013<br>9 | 0                | 1.98<br>E-05 | 0            | 0.00<br>0396 | 0 | 0 | 9.91<br>E-05 | 0.00<br>0634 | 0.00<br>0119 | 0.00<br>0515 | 7.93<br>E-05 | 0.00<br>0892 | 9.91<br>E-05 | 0.00<br>0436 | 0.00<br>0694 | 0.00<br>0178 | 0.00<br>0357 | 0            | 5.94<br>E-05 | 0.00<br>0337 | 5.94<br>E-05 | 0            | 0.00<br>0773 | 0.00<br>0258 | 1.98<br>E-05 | 7.93<br>E-05 | 3.96<br>E-05 | 3.96<br>E-05 |
| Marmoset       | omnivore  | 0.00<br>023<br>3 | 0                | 0.00<br>0233 | 0            | 0.00<br>0602 | 0 | 0 | 1.94<br>E-05 | 0.00<br>033  | 9.71<br>E-05 | 0.00<br>0427 | 0.00<br>0214 | 0.00<br>0466 | 0.00<br>0136 | 0.00<br>0913 | 0.00<br>0583 | 0.00<br>0155 | 0.00<br>0214 | 0            | 1.94<br>E-05 | 3.88<br>E-05 | 0            | 0            | 0.00<br>0136 | 0.00<br>0136 | 0            | 3.88<br>E-05 | 0            | 0            |
| Mouse          | omnivore  | 0.00<br>013<br>4 | 0                | 1.38<br>E-05 | 2.43<br>E-06 | 0.00<br>0482 | 0 | 0 | 0.00<br>0211 | 0.00<br>0291 | 9.39<br>E-05 | 0.00<br>0263 | 0.00<br>0181 | 0.00<br>0961 | 0.00<br>0138 | 0.00<br>0313 | 7.12<br>E-05 | 1.46<br>E-05 | 0.00<br>0304 | 8.90<br>E-06 | 4.86<br>E-06 | 0.00<br>0232 | 2.51<br>E-05 | 4.05<br>E-05 | 0.00<br>0565 | 0.00<br>0242 | 1.62<br>E-06 | 1.21<br>E-05 | 5.67<br>E-06 | 1.62<br>E-06 |
| Saki           | omnivore  | 0.00<br>030<br>7 | 0                | 0.00<br>0142 | 7.87<br>E-06 | 0.00<br>0362 | 0 | 0 | 0.00<br>0244 | 0.00<br>085  | 0.00<br>026  | 0.00<br>0456 | 0.00<br>0252 | 0.00<br>1039 | 0.00<br>0291 | 0.00<br>0818 | 0.00<br>074  | 0.00<br>0189 | 0.00<br>0425 | 2.36<br>E-05 | 0.00<br>0102 | 0.00<br>0472 | 4.72<br>E-05 | 0            | 0.00<br>0543 | 7.87<br>E-05 | 3.15<br>E-05 | 7.87<br>E-05 | 0            | 1.57<br>E-05 |
| SpecBear       | omnivore  | 0.00<br>017      | 5.13<br>E-05     | 0            | 5.13<br>E-05 | 0.00<br>0923 | 0 | 0 | 0            | 5.13<br>E-05 | 0            | 0.00<br>041  | 5.13<br>E-05 | 0.00<br>0103 | 0            | 0.00<br>0462 | 0.00<br>0128 | 2.56<br>E-05 | 0.00<br>0103 | 2.56<br>E-05 | 0            | 0.00<br>0128 | 0            | 0            | 0.00<br>0718 | 0            | 0            | 0            | 0            | 0            |





**Supplemental Table S13.**The qPCR primers for *TP53* and amylase genes.

| Primer code     | Sequence (5'->3')     | Target gene | Target species          |
|-----------------|-----------------------|-------------|-------------------------|
| TP53_New_BEAR_F | GAAGACCTACCCTGGCACCTA | TP53        | Ursidae and giant panda |
| TP53_New_BEAR_R | CAGAAAAACCCAAGCGGAT   |             |                         |
| TP53_New_CAT_F  | CCCTGTCATCCTTTGTCCCT  | TP53        | Felidae                 |
| TP53_New_CAT_R  | AAGGTCACGGGCCAAACTA   |             |                         |
| AMY_New_BEAR_F  | GCTTAGAGCTCCACAGCACA  | amylase     | Ursidae and giant panda |
| AMY_New_BEAR_R  | CATTTCCATCCCCAGAAACA  |             |                         |
| AMY_New_CAT_F   | GCTTAGGGTTCTACAACACA  | amylase     | Felidae                 |
| AMY_New_CAT_R   | CATTGCCATCCCCAGAAACA  |             |                         |

**Supplemental Table S14.** Amylase copy numbers in individuals quantified using real time PCR. Mean estimates of each individual from three replicates are reported.

| Common name | Sample_ID | Copy number | Common name | Sample_ID | Copy number |  |  |  |
|-------------|-----------|-------------|-------------|-----------|-------------|--|--|--|
| Giant panda | Yuanrui   | 2.11        | Leopard     | leopard-1 | 0.83        |  |  |  |
|             | Eryatou   | 2.08        |             | leopard-2 | 1.21        |  |  |  |
|             | Longban   | 1.93        | Tiger       | pta03     | 1.05        |  |  |  |
|             | Shulan    | 1.76        |             | pta01     | 0.76        |  |  |  |
|             | Yaqi      | 1.53        |             | pta04     | 1.36        |  |  |  |
|             | Qiuban    | 1.78        |             | pta169    | 1.14        |  |  |  |
|             | Wuyi      | 1.88        |             | pta179    | 1.09        |  |  |  |
|             | Yuanyuan  | 1.68        |             | pta180    | 1.08        |  |  |  |
|             | Yashuan   | 1.59        |             | pta181    | 0.94        |  |  |  |
|             | Maomao    | 1.79        |             | pta199    | 0.98        |  |  |  |
|             | Jili      | 1.87        |             | pta201    | 1.24        |  |  |  |
|             | Yuanyuany | 2.12        |             | pta202    | 0.99        |  |  |  |
|             | Aoliao    | 2.08        |             | pta203    | 1.24        |  |  |  |
|             | Aili      | 1.74        |             | pta204    | 1.04        |  |  |  |
|             | Yingying  | 1.69        |             | pta205    | 1.09        |  |  |  |
|             | Mengmeng  | 1.79        |             | pta206    | 1.19        |  |  |  |
|             | Jinjin    | 2.07        |             | pta216    | 1.18        |  |  |  |
|             | Xiaojiao  | 2.01        |             | pta217    | 1.15        |  |  |  |
|             | Yalin     | 2.18        |             | pta218    | 1.2         |  |  |  |
|             | Qianqian  | 1.83        |             | pta219    | 1.21        |  |  |  |
|             | Dajiaozi  | 1.77        |             | pta220    | 1.09        |  |  |  |
|             | Mengmengm | 1.83        |             | pta221    | 1.22        |  |  |  |
|             | Chengdui  | 2.11        | pta222      | 1.34      |             |  |  |  |
|             | Bingbing  | 2.02        | pta273      | 1.23      |             |  |  |  |
|             | Shuyun    | 1.68        | Lion        | lion-1    | 1.22        |  |  |  |
|             | Yaer      | 1.59        |             | lion-2    | 1.09        |  |  |  |
|             | Menglan   | 1.99        |             | lion-3    | 1.03        |  |  |  |
|             | Hexin     | 2.01        | Average     |           | 1.12        |  |  |  |
|             | Xiaoyatou | 1.93        |             |           |             |  |  |  |
|             | Jiaozi    | 1.83        |             |           |             |  |  |  |
| Saner       | 1.86      |             |             |           |             |  |  |  |
| Chenggong   | 1.93      |             |             |           |             |  |  |  |
| Xinban      | 2.11      |             |             |           |             |  |  |  |
| Kelin       | 1.92      |             |             |           |             |  |  |  |
| Xiangbing   | 1.88      |             |             |           |             |  |  |  |
| Qinghe      | 1.89      |             |             |           |             |  |  |  |
| Nini        | 2.09      |             |             |           |             |  |  |  |
| Qizhen      | 1.8       |             |             |           |             |  |  |  |
| Bingdian    | 2.02      |             |             |           |             |  |  |  |
| Xingya      | 2.01      |             |             |           |             |  |  |  |
| Black bear  | black-1   | 1.74        |             |           |             |  |  |  |
|             | black-2   | 1.79        |             |           |             |  |  |  |

|            |         |      |  |
|------------|---------|------|--|
| Brown bear | brown-1 | 1.99 |  |
|            | brown-2 | 2.07 |  |
| Average    |         | 1.89 |  |

**Supplemental Table S15.** Amylase copy numbers found in whole genome data in *Carnivora* from NCBI.

| Common name        | Scientific name                    | Copy number |
|--------------------|------------------------------------|-------------|
| Amur tiger         | <i>Panthera tigris altaica</i>     | 1           |
| cheetah            | <i>Acinonyx jubatus</i>            | 1           |
| domestic cat       | <i>Felis catus</i>                 | 1           |
| domestic ferret    | <i>Mustela putorius furo</i>       | 1           |
| Hawaiian monk seal | <i>Neomonachus schauinslandi</i>   | 1           |
| leopard            | <i>Panthera pardus</i>             | 1           |
| Pacific walrus     | <i>Odobenus rosmarus divergens</i> | 1           |
| Weddell seal       | <i>Leptonychotes weddellii</i>     | 1           |
| giant panda        | <i>Ailuropoda melanoleuca</i>      | 2           |
| polar bear         | <i>Ursus maritimus</i>             | 2           |
| dog                | <i>Canis lupus familiaris</i>      | 6           |
