# Supplementary material for: Age-associated microbiome shows the giant panda lives on hemicelluloses, not on cellulose
Source: PubMed Central journal article supplement — ISME J. 2018 Feb 1;12(5):1319–28. doi: 10.1038/s41396-018-0051-y (PMC5931968; doi:10.1038/s41396-018-0051-y), 2018-02-01
Supplement: 41396_2018_51_MOESM2_ESM.pdf [file 41396_2018_51_MOESM2_ESM.pdf]

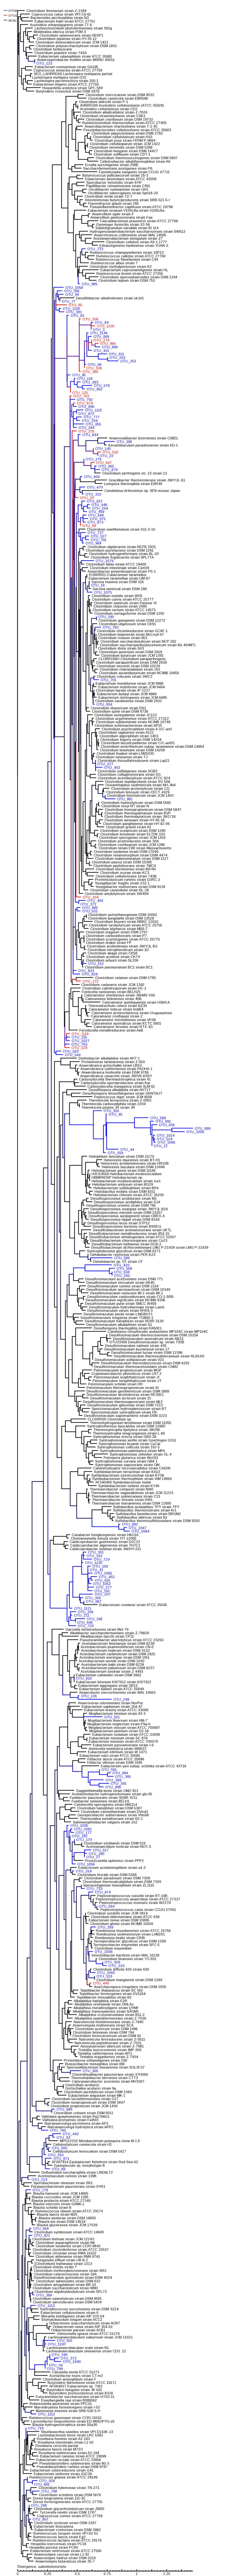

Divergence, substitutions/site

0 0.25 0.5 0.75 1 1.25
